# Supplementary material for: The temperature dependence of Mössbauer quadrupole splitting values: a quantum chemical analysis
Source: Royal Society of Chemistry journal article supplement (doi:10.1039/d4cc03943b), 2025-01-01
Supplement: d4cc03943b1.xlsx [file d4cc03943b1.xlsx]

## Sheet: 77K-Data
Structure-Nr.	FSPE / Ha	Mull (Fe)	α dxy / %	α dxz / %	α dyz / %	α dx²-y² / %	α dz² / %	ß dxy / %	ß dxz / %	ß dyz / %	ß dx²-y² / %	ß dz² / %	Vxx / a.u.-3	Vyy / a.u.-3	Vzz / a.u.-3	η	δ / mm s-1	ΔEQ / mm s-1	tRun / core∙h
1	-3441.21	3.89337	10	96.3	97.6	99.9	97.8	10	78.9	6.5	11.6	11.4	-0.0067	-1.4451	1.4518	0.99074	0.906426	2.71023	18.4442
2	-3441.18	3.84972	98.9	96.1	97.3	99.3	97.9	11	84.8	4.3	11.3	12.5	-0.153	-1.3923	1.5453	0.801968	0.904131	2.75945	18.6639
3	-3441.19	3.87028	99.2	95.9	97.4	99.7	98.1	10.6	84.9	3.7	11.4	11.6	-0.0455	-1.5707	1.6162	0.943638	0.903852	2.98248	16.7884
4	-3441.29	3.85953	99.4	96.4	97.5	99.2	98	14.7	68	6.1	19.6	13.6	-0.2492	-1.6284	1.8776	0.734601	0.974917	3.30487	21.4734
5	-3441.22	3.85932	99.6	96.3	97.5	98.4	98.1	11.9	79.5	10.9	8.7	10.6	-0.2996	-1.2221	1.5217	0.606207	0.954136	2.61247	17.2003
6	-3441.22	3.85043	99.4	96.5	97.4	99.6	97.6	12.4	52.5	29.3	15.2	14.4	-0.1377	-1.6324	1.7702	0.844385	0.864888	3.19116	26.4999
7	-3441.2	3.86913	99.2	96.9	98.1	99.8	98.1	9.2	78.6	9.3	10.8	12.3	-0.1326	-1.4045	1.5371	0.827472	0.962534	2.7605	18.7021
8	-3441.23	3.86809	99.4	95.7	97.7	100	97.7	10.3	82.3	4.1	12.2	12.2	-0.2816	-1.3966	1.6782	0.664384	0.936734	2.91263	18.7896
9	-3441.19	3.88972	99.4	96.3	98.2	99.8	98.2	10.7	78.1	7.3	13.4	10.2	0.2215	1.661	-1.8825	0.764644	0.914362	-3.3346	22.1312
10	-3441.23	3.92147	99.7	95.8	97.4	99.9	98.4	10.3	71.1	11.2	13	12.4	0.0478	1.4746	-1.5224	0.937222	0.846352	-2.80501	18.4789
11	-3441.18	3.87121	99	96.1	97.6	100.4	98.4	9.6	77.6	9.8	12.4	12.1	-0.203	-1.4829	1.6859	0.759201	0.938798	2.98284	17.1424
12	-3441.17	3.84167	99.1	96	97.4	99.1	97.7	9.9	80.2	10.9	11.8	10.6	-0.1483	-1.432	1.5803	0.812301	0.954023	2.82846	18.4712
13	-3441.24	3.87468	98.6	96	97.6	99.5	98	10.5	76.8	8.9	10.6	13.1	-0.2391	-1.2624	1.5015	0.681553	0.954732	2.61468	19.0654
14	-3441.2	3.87016	99.1	96.5	97.5	99.3	97.8	9.5	75.7	10.5	11.5	13.4	-0.3363	-1.4228	1.7591	0.61762	0.949637	3.02634	17.7782
15	-3441.25	3.8524	99.1	96.3	97.7	98.8	97.6	11.3	82.6	3.8	10.5	13.5	-0.0091	-1.4254	1.4345	0.987284	0.91431	2.6756	18.7295
16	-3441.24	3.8674	98.6	96.9	97.7	99.9	98.1	9.6	79	9.8	11.9	9.5	-0.1862	-1.2787	1.4649	0.745734	0.992048	2.58452	18.6283
17	-3441.2	3.85684	99.6	96.3	97.5	99.1	98	13.3	78.1	9.1	12.3	11.1	-0.0361	-1.3952	1.4314	0.949496	0.961386	2.64512	20.1934
18	-3441.22	3.87169	98.5	96.2	97.7	99.7	97.8	9.5	79.1	8.6	11.2	10.6	-0.1617	-1.5198	1.6815	0.807677	0.964579	3.00651	15.6301
19	-3441.22	3.88076	99.2	96.2	97.4	99.8	97.8	10	81.1	5.8	12.1	11.6	-0.0836	-1.2777	1.3613	0.877178	0.929949	2.47263	16.4469
20	-3441.23	3.86262	99.5	96.5	97.8	99.5	97.9	13.1	74.8	6.6	13.9	13.3	-0.3424	-1.5577	1.9001	0.639568	0.953356	3.28224	21.8148
21	-3441.25	3.83881	99.3	96.1	97.7	99.5	98.3	10.1	83.6	3.9	10.8	12.9	-0.3828	-1.3342	1.717	0.554066	0.988769	2.92123	19.352
22	-3441.2	3.8672	99.3	96.4	97.8	99	98.3	12.5	77	7.2	13.2	9.8	-0.2156	-1.643	1.8586	0.768029	0.942218	3.29455	24.642
23	-3441.25	3.83905	99.3	95.9	97.5	99.2	97.4	12.6	83	6.2	10.7	11.1	-0.2625	-1.2355	1.498	0.649549	0.91162	2.59254	17.6746
24	-3441.17	3.85784	99.4	95.8	97.3	98.5	98.2	11.7	81.5	4.4	11.5	12.2	-0.1602	-1.4962	1.6564	0.806568	0.937945	2.96093	18.4278
25	-3441.2	3.83757	98.9	96.6	97.5	98.4	98.5	25.4	60.6	6.7	17.2	12.8	-0.6258	-1.5219	2.1477	0.417225	0.965176	3.57975	21.6236
26	-3441.16	3.86989	99.5	96.4	97.7	99	97.3	10.6	76.4	6.6	10.6	15.4	-0.2793	-1.4115	1.6908	0.669658	0.906981	2.93751	17.5859
27	-3441.22	3.86525	98.9	96.1	97.8	99.5	98	10.5	84.5	3.9	10.7	11.3	-0.0016	-1.4969	1.4985	0.997892	0.959705	2.80232	18.7644
28	-3441.19	3.846	98.8	96.5	97.5	99.2	97.9	9.3	86.5	6	9.8	9.9	-0.2322	-1.4251	1.6573	0.719748	0.997338	2.90826	18.3765
29	-3441.15	3.85049	99.4	95.7	97.3	99.5	97.3	10	84.6	4	10.2	13	-0.3819	-1.3141	1.696	0.549617	0.954093	2.88337	19.1866
30	-3441.22	3.8587	98.9	96.6	97.2	99.3	98.5	9.8	77.8	12.9	11	10.5	-0.2648	-1.357	1.6218	0.67348	0.994489	2.81965	19.6103
31	-3441.21	3.85249	99.6	96.7	97.4	99.6	97.8	11.9	81.8	4.4	13.7	10.6	-0.0419	-1.5509	1.5927	0.947445	0.959699	2.94179	18.16
32	-3441.17	3.85969	99.5	96	98.1	99.5	98.3	11.3	79.9	8	10.8	11.5	-0.226	-1.3054	1.5314	0.704791	0.898276	2.67915	14.804
33	-3441.14	3.84807	99.4	96.6	97.5	99.1	98.2	17.2	64.6	12.7	15.7	11.4	-0.592	-1.2236	1.8156	0.347876	0.955546	3.00079	24.2085
34	-3441.17	3.85839	98.5	96.7	97	99.4	98	14.4	53.2	23.4	17.2	14.2	-0.2415	-1.4274	1.6689	0.710584	0.905705	2.92305	26.7364
35	-3441.21	3.86833	99.8	96.2	97.8	99.6	97.9	11.1	71.2	15.2	11.5	12.2	-0.1791	-1.4283	1.6075	0.777113	0.889428	2.85496	21.6586
36	-3441.12	3.88711	99.2	95.7	97.6	99.5	98.1	11.5	73.6	11.1	11.5	11.7	0.124	1.2759	-1.3999	0.822819	0.869385	-2.51138	17.3504
37	-3441.17	3.87543	99.8	96.1	97.3	99.1	98.2	12.3	66.7	17.1	10.2	14.6	-0.1452	-1.1765	1.3216	0.780293	0.913586	2.34894	16.6215
38	-3441.22	3.85795	99.7	96.2	97.1	99.8	97.8	10.3	85.4	4.4	10.8	10.6	-0.1244	-1.3057	1.4302	0.825967	0.949328	2.56754	19.0044
39	-3441.24	3.87899	99.1	96.9	97.8	99.2	97.8	12.5	83.2	3.8	9.7	9.9	-0.1655	-1.5083	1.6738	0.802281	0.977364	2.98918	17.2621
40	-3441.18	3.8367	98.8	96.9	97.1	99.2	97.8	13.9	60.4	23.9	16.9	9.1	-0.1225	-1.4403	1.5628	0.843179	0.951323	2.81661	20.5824
41	-3441.19	3.85278	99.2	96.8	97.2	99.3	97.7	9.6	56	33.3	12.2	11.3	0.055	1.505	-1.56	0.929474	0.932746	-2.86897	29.8128
42	-3441.25	3.85614	99.4	96.3	97.5	99.4	98.1	10.8	84.5	4.7	12.9	9.5	0.1724	1.363	-1.5354	0.775425	0.956194	-2.72603	18.6951
43	-3441.16	3.88976	98.5	96	98	99.7	97.6	10.2	68.2	12.6	12.9	15	-0.1367	-1.4888	1.6255	0.831855	0.870657	2.92202	21.2646
44	-3441.19	3.86383	98.6	96.5	97.7	99.3	98.4	9.9	75.9	11.5	12.7	11	-0.1891	-1.4569	1.6459	0.770274	0.962006	2.91901	18.8618
45	-3441.1	3.90313	99.3	96.3	97.8	99.7	98.1	10.5	76.2	8.3	12.8	10.4	0.1144	1.5402	-1.6546	0.861777	0.888678	-2.99471	14.3324
46	-3441.21	3.86773	98.6	96.5	97.4	99.4	97.9	10.3	77	11.4	12.7	10	-0.2489	-1.415	1.6638	0.700835	0.980035	2.90852	18.4667
47	-3441.2	3.86661	98.7	96.9	97.9	99.6	98.4	13.4	72.3	3.3	18.4	12.6	0.0134	1.9407	-1.9541	0.986293	0.953527	-3.64397	89.598
48	-3441.23	3.90157	99.3	95.9	97.5	99.9	98	10.7	77.2	7.1	11.2	12.7	0.0279	1.3528	-1.3807	0.959605	0.874065	-2.55773	15.4689
49	-3441.24	3.88542	99.1	96.1	97.9	99.5	97.5	10.7	83.4	4.4	11.3	10.1	0.0215	1.5142	-1.5357	0.972004	0.932676	-2.85365	19.08
50	-3441.17	3.8836	99	96.8	98.5	99.5	98.3	8.6	80.3	6.4	11.7	11.2	-0.3556	-1.3386	1.6943	0.580214	0.992753	2.89541	17.3087
51	-3441.27	3.90648	99	96.4	97.6	99.6	97.9	11.2	67.7	18.1	11.7	10.3	0.0911	1.3901	-1.4812	0.877041	0.911233	-2.6904	16.8878
52	-3441.26	3.8758	99.4	96.3	97.6	99.8	97.8	9.8	78.9	3.7	11.4	15.7	-0.1771	-1.4231	1.6003	0.778607	0.938041	2.84314	18.4031
53	-3441.24	3.84375	98.8	96.4	97.3	99.1	98.3	9.5	80.6	5.9	10	16.1	-0.4067	-1.2282	1.6349	0.502487	0.935406	2.75843	21.0148
54	-3441.27	3.85236	98.6	96.3	97.4	99.5	97.8	18.5	66.3	9.9	14.8	12.8	-0.4222	-1.3359	1.758	0.519742	0.978673	2.9743	21.5509
55	-3441.21	3.91758	99	96.3	98.1	99.4	98	10	76.3	6.2	11.8	12	-0.0023	-1.358	1.3603	0.996574	0.890971	2.54316	15.3674
56	-3441.16	3.87127	99.3	96.8	97.8	99.6	98.1	9.7	81.3	7.4	13	8.6	-0.1155	-1.6641	1.7796	0.870141	1.02819	3.2272	19.5342
57	-3441.29	3.85495	99.3	96.3	97.7	99.2	98	10.7	77.5	9.5	13.6	10.5	-0.1631	-1.3021	1.4652	0.777433	0.970398	2.60249	16.8847
58	-3441.16	3.8619	98.6	96.6	97.2	99.4	97.9	17.8	57.7	13.1	21.3	11.8	-0.7315	-1.2558	1.9873	0.263863	0.951101	3.25749	21.5927
59	-3441.22	3.86473	98.8	96	97.3	99.5	97.9	15.1	69.1	6.6	18.1	12.2	-0.3475	-1.3822	1.7298	0.598155	0.919811	2.96542	21.5424
60	-3441.19	3.84897	98.7	96.7	97.9	99	97.7	12.1	68.1	11.3	17.2	14.3	-0.3962	-1.4152	1.8115	0.562518	0.938235	3.08637	21.5253
61	-3441.25	3.8718	99.3	96.6	97.6	99.2	98	10.6	83	5.5	11.2	10.3	0.0742	1.5573	-1.6315	0.909019	0.952869	-2.9857	18.9768
62	-3441.14	3.84786	99.5	96.5	97.7	98.2	97.7	19.7	67.8	3.7	19.8	11.8	-0.1142	-1.6569	1.7711	0.870996	0.952656	3.21246	21.5031
63	-3441.21	3.89445	99.1	96.2	97.5	99.3	97.6	12	70.5	13.3	10.9	12.3	-0.2688	-1.4896	1.7585	0.69423	0.873345	3.06984	19.9658
64	-3441.2	3.86874	98.9	96.1	97.5	99.3	98.5	9.6	79.6	7.6	11.6	12.8	-0.5722	-1.2014	1.7736	0.354776	0.923788	2.93362	18.7845
65	-3441.1	3.86768	99.3	96	97.3	98.9	97.1	11.3	78	7.8	10.4	13.7	-0.1639	-1.1723	1.3362	0.754654	0.9077	2.36184	18.8225
66	-3441.2	3.85618	99.3	96.9	97.8	99.6	97.6	13	80.2	4.4	13.9	10.2	-0.1215	-1.6225	1.7441	0.860626	0.995554	3.15584	18.7138
67	-3441.1	3.87246	99.2	96.4	97.8	99.2	98.2	12.4	74.5	5.2	15.6	12.6	-0.2461	-1.4746	1.7207	0.713911	0.931652	3.01591	19.2156
68	-3441.18	3.89125	99.7	96	97.8	99.9	97.7	11.6	71.6	4.9	17.4	13.9	0.0403	1.61	-1.6503	0.951112	0.915014	-3.0509	18.4513
69	-3441.1	3.88071	99.3	95.8	97.9	99.5	98.2	11	76.9	7.5	11.4	12.6	-0.1361	-1.3171	1.4531	0.812736	0.888791	2.60103	17.5785
70	-3441.24	3.86091	99.4	96.2	97.8	99.7	97.9	12.4	79.6	3.5	15.4	10.1	0.0747	1.5299	-1.6046	0.906881	0.932338	-2.93499	18.2858
71	-3441.13	3.84929	98.9	95.8	97.3	99.3	97.8	9.1	84.6	5.9	10.7	12.9	-0.511	-1.0252	1.5362	0.334733	0.956458	2.53543	14.2971
72	-3441.15	3.90954	99.3	96.8	98.2	99.3	97.9	11.4	71	11.5	11.5	11.8	-0.0356	-1.4429	1.4784	0.951862	0.902209	2.73367	19.029
73	-3441.2	3.85074	98.8	96.1	97.8	99.9	97.7	17.8	64.3	7.6	20	12.2	-0.3531	-1.432	1.7851	0.604433	0.907064	3.06369	21.7138
74	-3441.21	3.85997	99.1	96.5	97.8	99.2	98.7	16.4	66.1	13.1	13.6	11.9	-0.4374	-1.3634	1.8008	0.514209	0.982532	3.04405	24.2708
75	-3441.14	3.86028	99.5	96.1	97	99	98.2	10.3	84.6	5.8	9.5	11	-0.3074	-1.2893	1.5967	0.614935	0.986401	2.74565	17.0859
76	-3441.17	3.86086	98.8	96.9	98.1	100	98.3	16.2	75.3	7.8	12.5	10	-0.3872	-1.421	1.8082	0.57176	1.00431	3.08557	20.8373
77	-3441.22	3.88825	99.1	96.6	97.4	99.5	97.4	11.5	74.7	8.4	10.6	13.3	-0.0225	-1.495	1.5175	0.970368	0.880975	2.81856	20.6115
78	-3441.16	3.86326	99.5	96	97.4	99.2	97.9	13.5	78.4	6.9	11.6	10.3	-0.0555	-1.4905	1.546	0.928248	0.941209	2.84221	18.7175
79	-3441.23	3.86714	99.8	96.5	97.5	99.8	97.8	12.4	80.1	7	11	11	0.0804	1.4087	-1.4891	0.892015	0.929054	-2.71413	19.9286
80	-3441.19	3.92572	99.6	96.8	97.5	99.2	98.2	10.6	72.8	10.5	10.8	11.3	-0.0355	-1.5381	1.5736	0.954869	0.89945	2.91185	18.3984
81	-3441.26	3.87481	99.7	96.6	97.8	99.4	97.8	11.6	74.7	8.1	12.9	13.1	-0.3728	-1.3198	1.6926	0.559475	0.918495	2.88231	18.9612
82	-3441.22	3.8735	98.7	96.4	97.6	99.9	97.6	10.1	79.4	8.5	11.9	11.2	0.0787	1.5369	-1.6156	0.902579	0.888536	-2.95218	18.6055
83	-3441.24	3.88062	99.1	96.1	97.6	100	98	10	71.6	13	12.9	12	-0.2022	-1.4258	1.628	0.751645	0.934789	2.87578	18.5484
84	-3441.21	3.88996	99.3	96.2	97.6	99.9	98	10.1	75.8	8.9	11.5	12.8	-0.2302	-1.3943	1.6245	0.71663	0.918844	2.84878	18.8184
85	-3441.19	3.89443	99.1	96.1	97.4	99.1	98.4	12	66.9	15.5	10.8	14.2	-0.4336	-1.0919	1.5255	0.431536	0.882145	2.54753	19.8365
86	-3441.24	3.87026	99.5	96.7	96.9	99.7	98.4	16.6	62.3	12.5	17	13.1	-0.3722	-1.2916	1.6638	0.552623	0.885753	2.83005	18.0554
87	-3441.18	3.87476	98.6	96.4	97.5	100.3	98.1	10.5	71.9	12.3	14.1	9.9	-0.0644	-1.7189	1.7833	0.927795	0.937115	3.27818	18.4842
88	-3441.2	3.90835	99.2	96.5	97.9	99.2	97.8	9.3	78.6	7.2	11.8	10.7	0.0046	1.6567	-1.6614	0.994452	0.914225	-3.10431	15.9941
89	-3441.25	3.89012	99.4	96.5	97.5	99.1	97.7	12	74.1	6.4	11.2	15	-0.3304	-1.306	1.6364	0.596235	0.838899	2.80439	18.4537
90	-3441.22	3.83969	99.1	96.3	97.5	99	97.9	31.5	50.6	4.2	24.8	12.1	-0.3523	-1.8571	2.2094	0.681106	0.937463	3.84704	37.4587
91	-3441.26	3.86907	99.1	96.3	97.4	99.9	97.5	14.2	78.4	4.3	12.8	11.3	0.0427	1.4882	-1.5309	0.944247	0.879159	-2.82542	19.086
92	-3441.17	3.8665	99	96.7	97.6	99.2	98	9.8	78.9	4	13.7	15	-0.1041	-1.3441	1.4482	0.856174	0.92484	2.61779	18.3091
93	-3441.2	3.89982	99.2	96.3	97.1	99.1	98.5	10.2	77.3	6.7	11.8	11.9	-0.2431	-1.3324	1.5755	0.69139	0.905098	2.74887	14.7198
94	-3441.17	3.85649	98.7	96.2	97.5	99.4	97.9	10.4	78.8	7	13.2	12	-0.0531	-1.6023	1.6554	0.935851	0.985375	3.04903	34.8494
95	-3441.21	3.8603	98.7	96	97.2	99.7	97.9	9.7	74.2	13.6	12.4	11.8	-0.0791	-1.55	1.6291	0.902849	0.920636	2.97702	21.6499
96	-3441.18	3.858	99.1	96.5	97.8	99.1	97.9	10.8	77.7	9.7	13.8	10.7	-0.0314	-1.1689	1.2003	0.947675	0.940417	2.2171	17.8678
97	-3441.23	3.86722	99.2	96.2	97.2	99.3	98.3	10.2	79.7	7.6	11	11.6	-0.159	-1.513	1.672	0.809821	0.89562	2.99087	18.7789
98	-3441.19	3.86921	98.8	96.5	97.8	99.8	98.2	13.5	75.7	5.3	13.2	12.6	-0.1554	-1.5008	1.6563	0.812316	0.946506	2.96441	21.3369
99	-3441.18	3.86535	99.5	96.2	98.1	99.4	98.1	12.5	82.1	3.5	12	11.2	-0.2001	-1.662	1.8621	0.785112	0.956132	3.31288	18.013
100	-3441.18	3.84884	98.8	96.6	97.4	99.9	98.1	18.4	63.5	11.9	17.3	11.3	-0.6458	-1.3171	1.9629	0.341953	0.98686	3.24222	18.2805
101	-3441.26	3.88315	99.6	96.7	97.9	99.3	98	11.2	82	3.2	11.5	11.4	0.1506	1.5113	-1.6619	0.818756	0.918909	-2.9788	19.6678
102	-3441.17	3.87716	98.9	96.1	98.1	99.6	98.4	10.5	78.2	7.3	12.6	10.5	-0.1997	-1.5137	1.7134	0.766952	0.94464	3.03647	21.6778
103	-3441.27	3.87088	99.6	96.5	97.6	99.2	98	13	82.1	4.7	10.2	10	-0.0274	-1.465	1.4924	0.963223	0.940633	2.76715	18.3462
104	-3441.13	3.86936	99.1	96	97.7	98.7	98.2	14	71.9	5.8	15.4	13.8	-0.3228	-1.3304	1.6532	0.609466	0.901984	2.83994	17.8193
105	-3441.25	3.85528	99.1	96.8	98	99.1	97.9	10.6	77.4	12.6	10	11	-0.3784	-1.3033	1.6817	0.549949	1.015	2.85925	17.5916
106	-3441.23	3.87287	99.5	96.5	97.6	99.3	97.7	12	75.3	11.6	9.8	10.4	-0.1462	-1.5597	1.7058	0.828635	0.976898	3.06428	16.3238
107	-3441.22	3.86938	99	96.2	98.1	99.5	97.8	9.3	82	3.5	11.5	14.3	-0.0053	-1.5699	1.5751	0.993333	0.928976	2.94234	19.19
108	-3441.23	3.83901	99.3	96.1	97.4	99	98	15.4	78.9	5	13.2	11.2	-0.2961	-1.5105	1.8065	0.672235	0.971633	3.14015	18.3541
109	-3441.23	3.90158	99.7	96.2	97	99.3	98.5	11	74.8	6.4	12.8	13.3	-0.0449	-1.4381	1.483	0.939466	0.842862	2.73377	12.9462
110	-3441.17	3.88723	99.3	96.1	97.7	99.6	98.3	10.7	77.7	7.4	11.7	11	-0.0446	-1.4626	1.5072	0.940866	0.876678	2.7794	14.5131
111	-3441.23	3.88744	99.4	95.8	97.8	100	98	9.9	77.3	6.7	12.1	13.5	-0.0211	-1.3438	1.3648	0.96913	0.895634	2.53431	15.3095
112	-3441.24	3.87322	99.4	96.4	97.2	100	98	12.4	67.8	14.9	13.3	12.6	-0.3602	-1.2459	1.606	0.55148	0.903076	2.73121	21.517
113	-3441.21	3.86357	99	96.2	97.9	98.9	97.6	9.9	80.7	7.1	12.8	11.2	-0.361	-1.3281	1.6892	0.572537	0.968613	2.88286	18.5303
114	-3441.17	3.89113	99.3	96.1	97	99.6	97.9	14.6	69.7	8.4	13	12.6	-0.3349	-1.3596	1.6944	0.604738	0.857662	2.90828	18.3526
115	-3441.21	3.89373	99.2	96.3	97.8	99.1	98.2	11.1	75.5	9.5	11.1	12.4	-0.174	-1.3192	1.4932	0.766904	0.878848	2.64629	15.9217
116	-3441.2	3.86107	98.7	96.8	98.4	98.7	97.9	14.7	67	15.4	14.2	9.8	-0.3812	-1.5378	1.919	0.602713	1.00811	3.29248	21.6865
117	-3441.25	3.8561	99.1	96.4	97.9	99.8	97.8	10.6	81	6.3	11.3	12.5	-0.3347	-1.2019	1.5367	0.564357	0.94807	2.61891	18.7265
118	-3441.23	3.92141	99.8	96.3	97.6	99.4	97.5	11.3	74.3	7.7	12.3	12.5	0.1549	1.416	-1.5709	0.802795	0.830239	-2.80574	16.1956
119	-3441.25	3.84977	99.1	96.5	98	99.5	98.5	19.5	70.9	4.4	17.5	9.3	-0.3054	-1.619	1.9244	0.682591	1.03534	3.35179	21.3393
120	-3441.24	3.85299	99.4	96.2	97.4	99.6	98	10.7	83.8	3.9	10.6	12.7	-0.0445	-1.3265	1.3711	0.935022	0.925893	2.52482	19.1441
121	-3441.2	3.87927	99.9	96.3	97.8	99.4	97.5	10.2	80.8	3.2	10.6	14.4	-0.0067	-1.7811	1.7879	0.992455	0.924327	3.33904	18.1373
122	-3441.26	3.86604	99.1	96	97	99.4	98.3	9.3	79.5	10.2	10.4	10.9	-0.3123	-1.2921	1.6044	0.610671	0.951521	2.7567	18.2544
123	-3441.24	3.86934	99.7	95.9	97.7	99.1	97.8	9.9	75.5	9.1	10.9	15.5	-0.4039	-1.1773	1.5811	0.489159	0.866045	2.66238	15.784
124	-3441.21	3.85387	98.9	96.7	97.5	99.5	98	10.1	78.9	9.4	11.4	11.3	-0.1786	-1.1311	1.3097	0.727228	0.94411	2.3018	18.4361
125	-3441.17	3.84382	98.6	96.9	97.9	99	97.9	8.9	87.7	5.2	10.6	10.1	-0.2421	-1.1881	1.4302	0.661406	0.986848	2.48079	17.3825
126	-3441.17	3.8501	98.9	95.9	97.6	99.1	97.5	9.7	84.4	4.1	11.1	12.1	-0.4391	-1.3841	1.8231	0.518349	0.962459	3.0837	30.4578
127	-3441.17	3.87006	99.3	96.3	97.2	99.3	97.5	11.4	74.6	12.1	10.7	13.5	-0.217	-1.323	1.54	0.718181	0.892256	2.70152	18.5437
128	-3441.27	3.85188	98.8	96.9	98	98.9	97.7	13.2	71.8	12.9	12.8	10.3	-0.4319	-1.5111	1.9431	0.555412	0.994132	3.30655	20.1693
129	-3441.27	3.89607	99.4	96.9	98.2	98.9	98.2	10.5	69.2	13.6	10.3	14.6	-0.166	-1.5055	1.6715	0.801431	0.913375	2.98441	18.2277
130	-3441.21	3.88046	99.6	96.3	97.3	99.7	97.7	12.2	76	4.7	13.3	14.5	-0.061	-1.5003	1.5613	0.921886	0.857647	2.86607	18.3746
131	-3441.16	3.87335	99.5	96.7	97.6	99.5	98.3	11	69.6	18.8	9.9	10.8	-0.0889	-1.4713	1.5603	0.885995	0.981751	2.8399	17.9302
132	-3441.27	3.86076	99	96.5	97.6	99.2	97.7	14.8	61.3	10.9	23.2	11.4	-0.5428	-1.6835	2.2263	0.512336	0.938808	3.76216	29.8185
133	-3441.24	3.84538	99.6	96.7	97.4	98.7	97.8	22.1	64.1	4.5	20.9	10.9	0.1379	1.7985	-1.9364	0.857532	1.00921	-3.50142	20.9919
134	-3441.18	3.87317	99.2	96	97.8	98.9	97.9	10.8	81.5	7.6	9.3	10.4	-0.3554	-1.2763	1.6316	0.56442	0.970612	2.78083	19.9123
135	-3441.18	3.83871	98.8	97.4	97.6	99.2	98.2	31.2	16.3	35.7	28.4	10.7	-0.4419	-1.6909	2.1328	0.585608	1.01306	3.64823	31.5533
136	-3441.16	3.90875	99.7	96.3	98.1	100	97.8	11.8	69	14.3	10.8	10.9	-0.0832	-1.4075	1.4907	0.888373	0.901002	2.71473	18.3276
137	-3441.16	3.87633	99.1	96.2	97.7	99.9	98.6	14.9	72.6	6.9	12.9	12	-0.0629	-1.4671	1.53	0.917797	0.852872	2.80582	18.4135
138	-3441.19	3.88405	99.1	96.3	97.4	99.7	98.1	9.2	78.6	8	12.9	11.5	-0.1105	-1.4162	1.5267	0.855247	0.897696	2.75907	18.5299
139	-3441.23	3.86845	98.8	96.6	98.1	99.7	97.5	15	78.2	4.3	12.6	10.7	-0.1197	-1.6389	1.7586	0.863912	0.950257	3.18452	21.0521
140	-3441.17	3.88025	99.3	96.4	97.5	99.7	98.1	9.5	82.2	5	11.7	11.5	-0.2715	-1.3485	1.62	0.6648	0.943027	2.81188	15.6487
141	-3441.21	3.85258	98.9	96.4	97.6	98.5	98.2	13.3	79.9	6.7	11.8	11.1	-0.2342	-1.4947	1.7289	0.729035	0.973315	3.03972	21.6633
142	-3441.13	3.78474	97.8	97	97.5	98.3	97.6	56.1	3	3.9	52.6	12.2	-1.2938	-1.5398	2.8335	0.086816	1.00194	4.59736	35.5111
143	-3441.26	3.86825	99.4	96.8	97.3	99.2	98.1	9.5	77.8	11.7	10.2	11.4	-0.2026	-1.2229	1.4255	0.715757	0.944348	2.4995	18.8145
144	-3441.23	3.83402	98.7	95.9	97.5	99.4	97.8	23.4	57.5	11.2	20.8	10.6	-0.7973	-1.443	2.2403	0.288189	0.961972	3.68027	30.1597
145	-3441.22	3.86627	99.6	96.5	97.3	98.9	97.9	10.3	70.3	19.7	10.9	11.1	-0.2966	-1.2699	1.5665	0.621327	0.941896	2.69686	21.388
146	-3441.14	3.85087	98.8	96.7	97.5	99.9	97.6	18.3	71.7	6.1	16.5	9.7	-0.21	-1.5859	1.7959	0.766157	0.952817	3.18218	21.6632
147	-3441.26	3.8546	99.6	96.3	97.3	100	97.3	10.8	75.8	12.9	12	11.5	-0.02	-1.329	1.349	0.970354	0.926469	2.50566	18.5066
148	-3441.17	3.87546	98.6	96.2	98.1	99.9	97.8	11.3	76.1	5.6	13.1	13.2	-0.3068	-1.3638	1.6705	0.632745	0.931699	2.88202	18.9709
149	-3441.14	3.80183	98.8	96.3	97.3	98.2	98.1	44.4	23.5	4.1	41.4	13.7	-1.0931	-1.3366	2.4297	0.10023	0.978993	3.9438	29.5994
150	-3441.23	3.9141	99.1	96.3	97.8	99.6	97.9	11	72.5	7	12.1	14.2	-0.0808	-1.2989	1.3797	0.88283	0.815279	2.50945	14.196
151	-3441.11	3.85656	98.8	96.5	97.4	100.1	98.1	9	76.1	12.5	11.4	13.4	-0.3168	-1.2205	1.5373	0.587817	0.962314	2.63068	18.4798
152	-3441.19	3.89175	99.1	96.9	97.7	98.6	97.8	10.5	80.5	4.3	11.3	11.6	-0.1944	-1.3596	1.554	0.749835	0.950427	2.74403	19.9653
153	-3441.17	3.87355	99.2	96.6	97.2	99.1	97.9	14	59.1	22.2	13.7	10.7	0.0564	1.6398	-1.6961	0.933552	0.878317	-3.12231	20.1996
154	-3441.15	3.84707	98.7	96.3	97.4	98.7	98	9.4	87.1	4.9	9.9	10.3	-0.288	-1.3869	1.675	0.656099	1.01728	2.90238	19.4646
155	-3441.19	3.86145	99.6	96.6	96.9	99.3	97.9	10.4	74.6	16.1	10.5	9.7	-0.1045	-1.3499	1.4544	0.856341	0.989312	2.62912	24.0069
156	-3441.26	3.88088	99.3	96.1	98	99.3	98	10.7	77.7	10.8	10.5	10.7	-0.1599	-1.4721	1.632	0.803986	0.957026	2.91563	18.7253
157	-3441.23	3.85298	99.3	95.6	97.6	99.6	98.2	20.6	69	4.4	17.6	11.3	-0.0543	-1.8147	1.8689	0.941931	0.89022	3.44734	19.7927
158	-3441.17	3.84309	99	96.4	97.6	99.1	97.9	15.9	71.6	7	15.8	12.1	-0.3608	-1.5377	1.8985	0.619958	0.931251	3.26753	22.0442
159	-3441.22	3.86357	99.3	96.8	97.8	99.2	98.5	10.8	71.3	16.9	10.5	10.9	-0.2765	-1.5537	1.8302	0.697833	1.02499	3.19745	21.4804
160	-3441.21	3.84667	99.4	96.4	97.7	99.2	98.3	14	74.7	7.2	13.2	13.2	-0.4422	-1.414	1.8562	0.523544	0.96484	3.14224	19.723
161	-3441.19	3.88927	98.7	96.2	97.7	98.7	98.2	17.7	64.5	8.1	15.7	13.1	-0.399	-1.5444	1.9434	0.589386	0.866588	3.32648	17.6624
162	-3441.14	3.90012	99.3	96.6	97.5	99.5	98	10	68.6	15	11.7	11.7	-0.1602	-1.4735	1.6337	0.803894	0.900537	2.91849	18.5641
163	-3441.17	3.83059	98.4	96.3	97.7	98.7	98	30.5	29.9	17.1	33.8	11.2	-0.578	-1.7547	2.3327	0.504415	0.981707	3.93712	27.558
164	-3441.22	3.87154	98.6	96.3	98	99.5	98.4	8.6	79.3	10.6	10.9	10.8	-0.2246	-1.4076	1.6322	0.724775	0.967904	2.86718	19.4932
165	-3441.16	3.88894	99.1	95.9	97.7	99.6	98.3	10.4	79.7	6.2	10.7	11.9	-0.3056	-1.3267	1.6323	0.625584	0.898178	2.81232	16.7589
166	-3441.21	3.87774	98.4	96.7	97.8	99.8	98.1	8.6	80.7	3.5	11.6	14.8	-0.2909	-1.5194	1.8103	0.678635	0.912376	3.15055	18.7016
167	-3441.22	3.84812	99	96.9	97.3	98.6	98.3	22.1	59.5	4	26.3	10.2	-0.2934	-1.7756	2.069	0.716411	1.03229	3.62814	38.4723
168	-3441.24	3.882	98.9	96.6	97.5	98.8	98	13.8	76.8	3.2	13.6	11.3	0.0307	1.6384	-1.669	0.963248	0.956572	-3.0947	19.6647
169	-3441.09	3.8464	98.5	96.3	98.2	99.4	98.1	9.2	83.1	3.9	15	10.3	0.0338	1.3564	-1.3903	0.95134	0.970044	-2.57028	21.3778
170	-3441.18	3.90597	99.3	96.6	97.9	99.3	98.3	12.2	77.3	3.3	10.7	15.1	0.2089	1.4687	-1.6776	0.750967	0.902524	-2.96297	21.0292
171	-3441.25	3.88495	99.1	96.2	98.1	99.2	97.8	10.7	82	5.9	9.9	10	-0.0861	-1.4244	1.5105	0.886055	0.971363	2.74933	18.9777
172	-3441.09	3.85186	99.1	97.1	98.2	98.8	97.7	17.1	59.9	10.4	19.5	12.6	-0.4046	-1.7013	2.1059	0.615754	1.001	3.6217	32.2865
173	-3441.23	3.84391	98.4	97.1	97.7	98.9	98.3	20.4	63.2	10.8	16.3	12.4	-0.7762	-1.2761	2.0523	0.243608	0.982074	3.35841	29.9354
174	-3441.2	3.82762	99.5	96.5	97.1	99	97.9	21.2	56.4	12.1	21.9	13	-0.7529	-1.0572	1.8101	0.168154	0.950004	2.94693	30.5385
175	-3441.2	3.88003	98.8	96.4	97.8	99.4	98.4	9	81	8.2	11.2	10.3	-0.1318	-1.4576	1.5894	0.834177	0.984089	2.85871	19.1979
176	-3441.2	3.8796	98.7	96.4	98.1	99.4	98.1	9	82.7	3.7	11.6	12.1	0.0388	1.6625	-1.7014	0.954356	0.951593	-3.14779	17.0912
177	-3441.22	3.88759	98.7	96.7	97.6	99.9	97.8	9.1	69.8	17	11.1	12.6	-0.4022	-1.1697	1.572	0.488249	0.917667	2.64656	18.9867
178	-3441.2	3.82372	98.7	96.9	97	99.4	97.9	34.7	41.3	6.9	30.8	10.9	-0.978	-1.587	2.565	0.237446	0.957653	4.19536	23.399
179	-3441.13	3.84777	99	95.9	97.5	99	97.6	13.3	74.6	6.9	12.8	13.9	-0.4484	-1.3095	1.7579	0.489826	0.985952	2.96036	19.6662
180	-3441.19	3.88044	99	96.5	97.6	99.3	97.6	14.5	75.6	7	11.4	10.2	-0.0097	-1.5387	1.5484	0.987512	0.903588	2.88828	18.6382
181	-3441.23	3.86069	98.9	96.8	98.1	98.8	98.2	14.6	74.5	10	12.6	10.4	-0.4388	-1.4744	1.9133	0.541255	0.998921	3.24819	21.8103
182	-3441.19	3.856	99.1	96.7	97.5	99.4	98.3	11.2	76.6	7.5	15.1	11.9	-0.2887	-1.4503	1.739	0.667987	0.97398	3.02025	18.8143
183	-3441.11	3.87674	99.2	96.4	97.6	98.6	98.5	12.6	78.5	7.7	8.9	12.5	-0.612	-1.2337	1.8457	0.336874	0.949821	3.04685	21.6598
184	-3441.16	3.82127	97.9	97.2	97.2	98	98.3	42.5	12.7	18.3	39.2	11	-0.9943	-1.6886	2.6829	0.258766	0.975809	4.39583	30.7307
185	-3441.11	3.8818	99.1	96.8	97.9	99.8	98.2	9.4	76.6	10.8	10.9	10.9	-0.212	-1.4319	1.6439	0.742102	0.93874	2.89798	21.2005
186	-3441.23	3.80496	98.4	96.9	97.2	98	98.3	45.1	18.3	4	46.2	12	-0.8754	-1.5779	2.4533	0.286367	0.994654	4.02938	25.8521
187	-3441.22	3.88504	98.7	96.7	98.1	99.4	98.3	9.6	80.5	6.3	11.6	11.1	-0.0569	-1.6857	1.7426	0.934646	0.93464	3.20874	20.7019
188	-3441.19	3.87655	99.2	96.4	97.7	98.7	97.7	9.1	86.9	3.2	10.6	9.2	-0.0116	-1.6191	1.6307	0.985811	0.990082	3.04044	17.4001
189	-3441.19	3.87224	99.6	97.1	98.3	99.2	97.8	12	70.8	5.4	14	17.6	-0.2678	-1.4988	1.7665	0.696845	0.986506	3.08555	19.1812
190	-3441.18	3.8574	99.6	96.3	97.6	99.5	97.8	10	85.4	3.2	10.9	12	0.0011	1.4791	-1.4802	0.998487	0.963284	-2.76864	21.1229
191	-3441.13	3.88061	99.6	96.1	98	99.1	97.7	9	83.4	4.8	11.8	10.2	-0.0652	-1.7865	1.8517	0.929533	0.940014	3.40542	24.1356
192	-3441.21	3.93257	99.4	96.4	97.5	99.6	97.8	11.1	68.8	11.4	13.3	11	0.3711	1.1794	-1.5505	0.521281	0.81461	-2.62378	18.2879
193	-3441.13	3.86433	99.2	96.7	97.8	99.8	97.9	10.7	73.4	13.1	11.9	11.6	0.017	1.4805	-1.4975	0.977326	0.946644	-2.7863	17.0628
194	-3441.17	3.88872	99.7	96.9	98.2	99.7	98	9.9	73.2	14.5	10.9	9.5	0.0035	1.5963	-1.5999	0.9956	0.949091	-2.99027	18.894
195	-3441.27	3.87854	98.8	96.1	97.5	99.4	97.9	11.5	79.6	6	11.3	12.7	-0.2558	-1.43	1.6858	0.696489	0.884659	2.9444	15.5005
196	-3441.19	3.86637	98.6	96.4	97.7	99.2	98.3	8.9	83.2	5.5	11.5	11.6	-0.2258	-1.3273	1.5531	0.709181	0.958551	2.71955	18.4809
197	-3441.19	3.87821	99.1	96.8	97.8	98.9	98.3	10.3	78.2	6.1	14.4	9.4	-0.14	-1.4354	1.5754	0.822232	0.983644	2.82593	21.3706
198	-3441.23	3.88251	99	96.5	97.1	99.1	98.2	10.6	39.9	46.1	10.6	11.6	-0.168	-1.4329	1.6008	0.790144	0.925908	2.85123	28.3618
199	-3441.15	3.8606	98.9	96.4	97.9	99.5	97.9	11.5	71.9	13.6	12.9	10.8	-0.0975	-1.3369	1.4344	0.864117	0.923064	2.59758	18.8152
200	-3441.19	3.86545	99.1	96.8	97.6	99.4	98.2	13.6	75	6.4	13.7	12.2	-0.049	-1.532	1.581	0.938043	0.96262	2.91356	19.5485
201	-3441.19	3.88432	99.1	96.1	97.7	99.9	98.3	9.9	83.5	4.9	9.8	11.5	-0.3272	-1.5081	1.8353	0.643422	0.912681	3.17251	18.7429
202	-3441.16	3.89473	99.7	96.9	98	99.4	98.1	11.4	68.4	13.6	9.5	14.6	-0.1319	-1.4528	1.5848	0.833511	0.915273	2.84991	18.418
203	-3441.21	3.88993	99	96.5	97.6	99.5	98.3	11.6	67.9	14.8	12.9	11.4	-0.1421	-1.543	1.6851	0.831332	0.922671	3.02886	19.801
204	-3441.17	3.88437	98.9	96.5	97.8	99.7	98.1	9.6	76.3	6.8	12.1	13.7	-0.3697	-1.243	1.6126	0.541546	0.888709	2.73796	18.0306
205	-3441.15	3.87001	99.1	96.8	97.5	99.5	98	10.4	70.5	15.2	11.7	12.1	-0.1242	-1.3473	1.4715	0.831247	0.911787	2.64481	17.5426
206	-3441.17	3.89913	99.4	96.6	97.7	99.7	98.2	11.5	76.3	8.1	11.8	10.1	-0.0698	-1.5624	1.6322	0.914508	0.937831	2.99096	18.5965
207	-3441.25	3.88112	99.4	96.5	97.4	99.4	97.5	11.4	71.8	12	12.5	12.9	0.055	1.2269	-1.2819	0.914177	0.859646	-2.34886	17.1087
208	-3441.22	3.87712	98.4	96.7	98.1	99.2	98.6	9.9	82.1	7.3	10.3	9.8	-0.0985	-1.5426	1.6412	0.879915	0.988311	2.98297	16.3278
209	-3441.16	3.82501	98.2	96.5	97.8	99.4	98	25.2	59.6	5.5	21.6	11.7	-0.4862	-1.6279	2.1142	0.540029	0.988603	3.58854	20.7233
210	-3441.22	3.88551	99.6	96.6	96.9	98.8	98.1	11	78.2	6	9.3	13.4	-0.2675	-1.1545	1.422	0.623756	0.893873	2.44917	16.2542
211	-3441.24	3.87975	98.9	96.5	97.8	99	97.9	12.5	69.9	9.9	14.6	12.5	-0.0949	-1.34	1.4349	0.867768	0.891204	2.6007	20.1818
212	-3441.24	3.85503	99	96.4	97.4	99.4	98.3	24.1	50.4	11.4	25.4	11.3	-0.7146	-1.2938	2.0083	0.288397	0.977658	3.29917	20.9378
213	-3441.29	3.89012	99	96.4	97.6	99.4	97.7	9.7	78.5	7.5	12.5	10.3	0.137	1.2854	-1.4223	0.807393	0.901353	-2.54296	16.4148
214	-3441.19	3.86611	98.9	96.7	97.2	99.2	97.9	20.7	63.1	6.2	20.4	10.8	-0.3529	-1.5692	1.9221	0.632805	0.950665	3.31601	24.4942
215	-3441.2	3.85213	99.2	96.8	97.8	99	98.7	15.2	58.9	14.9	19.7	12.6	-0.4659	-1.257	1.7229	0.459169	0.953685	2.88836	19.6068
216	-3441.15	3.83527	99.1	96.4	96.9	98.7	97.7	13.2	77.3	9	12.8	11.5	-0.4134	-1.2269	1.6403	0.495961	0.947185	2.76492	21.3843
217	-3441.19	3.84678	98.6	96.5	97.4	99.2	98.2	16.6	61.9	12.5	18.7	12.9	-0.4011	-1.3521	1.7532	0.542395	0.934973	2.97702	21.6391
218	-3441.25	3.87857	99.1	96.3	97.6	99.7	97.9	8.8	78.3	8.8	11	12.6	-0.4165	-1.2561	1.6726	0.501972	0.938521	2.82185	18.8927
219	-3441.21	3.86672	99.4	95.9	97.7	99.8	97.8	11.2	56.1	29.3	11.2	11.7	0.135	1.4404	-1.5753	0.828648	0.931407	-2.82987	29.5049
220	-3441.22	3.8536	98.8	97	98	98.8	98	16.3	59.7	11.8	20	12.8	-0.5473	-1.2876	1.8348	0.403457	0.969843	3.05286	21.9513
221	-3441.22	3.86373	98.8	96.6	97.5	99.4	97.6	14.9	69.9	9.2	14.6	11.7	0.0294	1.5171	-1.5465	0.962013	0.905086	-2.86661	18.7155
222	-3441.15	3.87257	99.1	96.8	97.7	99.3	98	12.2	79.1	6.1	12.5	11	-0.1313	-1.5558	1.6871	0.844335	0.967376	3.04134	19.1273
223	-3441.22	3.89962	99.4	97	98	99.1	97.5	12.2	68.1	10.3	12.9	14.2	-0.122	-1.4416	1.5635	0.844005	0.904707	2.81841	16.8863
224	-3441.19	3.84861	99.1	96.4	97.4	99.7	98.2	14.3	69.8	7.8	19.8	11.2	-0.3802	-1.5032	1.8834	0.596219	0.992583	3.22777	20.1937
225	-3441.23	3.89561	98.6	96.8	97.9	99.2	98	10.7	73.5	11.2	11.7	10.6	-0.2583	-1.2742	1.5325	0.662942	0.976392	2.65902	18.2756
226	-3441.17	3.86152	98.6	96.3	98.1	99.3	98.2	14.7	77	4.7	12.9	10.7	-0.4447	-1.5612	2.0059	0.556628	0.992148	3.41417	19.5243
227	-3441.22	3.83112	98.6	96.5	98	98.6	98	33.5	45.3	5	28.7	11.6	0.0808	2.0082	-2.089	0.922648	0.980981	-3.8354	23.8015
228	-3441.16	3.85877	98.9	96.2	96.9	99.2	98	9.8	75	13.8	11.6	12.1	-0.3215	-1.313	1.6345	0.606658	0.914489	2.80638	27.8965
229	-3441.22	3.86409	99.4	96.3	97.8	99.1	97.9	12.8	78.5	4.7	12.6	12.6	0.0914	1.4055	-1.4969	0.877854	0.917725	-2.71947	21.8212
230	-3441.15	3.87477	99.3	96	98	98.6	97.7	10.6	76.5	12	11.3	10.8	-0.1621	-1.4281	1.5902	0.796087	0.975514	2.836	21.6388
231	-3441.24	3.85545	99	96.4	97.1	99.2	98.7	20.5	55.2	10.6	22.7	13.1	-0.6233	-1.403	2.0263	0.384781	0.9654	3.36348	21.3256
232	-3441.09	3.86004	99.3	96.8	97.6	99.7	97.9	10.1	69.6	18.1	13.1	11.1	-0.4672	-1.1502	1.6173	0.42228	0.971859	2.69757	20.6244
233	-3441.2	3.85839	98.6	96	97.8	99.6	98.4	12.4	71.9	8.5	14.9	13.3	-0.4081	-1.2526	1.6606	0.50856	0.904587	2.80458	23.9313
234	-3441.18	3.86171	98.4	95.9	97.8	99.6	97.9	9.8	83	3.5	11.7	12.5	-0.2618	-1.4493	1.7112	0.693966	0.902212	2.98717	23.9824
235	-3441.21	3.86814	99.2	96.2	97.2	99.3	97.7	10.9	78.3	10	10.5	10.9	-0.0138	-1.5653	1.5792	0.982485	0.940568	2.94196	19.2021
236	-3441.1	3.85387	98.9	96.3	97.9	98.8	97.9	12.8	78.8	5.8	12.3	12.5	-0.4308	-1.3964	1.8272	0.528457	0.943508	3.09556	21.5528
237	-3441.14	3.92421	99.7	96.9	98.2	99.6	98.1	11.5	66.8	17	10.8	9.6	0.1858	1.2662	-1.452	0.744058	0.910479	-2.56074	18.5283
238	-3441.22	3.86457	99.1	96.1	97.7	99.4	98.4	13.5	79.2	5.3	11.7	11.2	-0.3044	-1.4458	1.7502	0.652112	0.973743	3.03048	24.4672
239	-3441.18	3.83067	98.3	96.7	97.2	99	98.4	41	34.3	6.1	31.4	11.6	-1.179	-1.3951	2.5741	0.083962	1.00474	4.17606	24.8162
240	-3441.2	3.80753	98.4	96.6	97.1	98.6	98.5	52	13.8	4	44.1	11.5	-0.8787	-1.7399	2.6186	0.328881	0.998238	4.31918	29.1549
241	-3441.15	3.87354	99.9	95.9	97.9	99.2	98.8	14.4	67.6	10.1	16.7	12.6	-0.5616	-1.414	1.9756	0.43146	0.896074	3.29913	18.7092
242	-3441.18	3.95184	100	96.8	98.4	99.8	98.1	11	68.3	9.3	12.9	11.7	0.1889	1.3991	-1.588	0.762107	0.855253	-2.81132	18.0484
243	-3441.2	3.88883	99	96.4	97.2	99.2	97.8	11.4	72.9	11	13.2	12.9	-0.1365	-1.4312	1.5677	0.825831	0.828988	2.81433	16.6492
244	-3441.08	3.89132	98.6	95.8	97.1	99.3	98.1	12.7	69.2	14.1	11.9	10.7	-0.0569	-1.4383	1.4952	0.923849	0.888299	2.74606	17.2033
245	-3441.14	3.88541	98.3	96.4	97.1	99.7	98	15.5	64.5	12.8	14.3	12.9	-0.2927	-1.2847	1.5774	0.628839	0.909509	2.71932	22.8947
246	-3441.19	3.84454	98.8	96.7	98.5	99.2	98.3	27.6	56.2	4.2	22.5	12.6	-0.4872	-1.6513	2.1385	0.54433	0.982886	3.63237	20.8931
247	-3441.19	3.88425	99.8	96.3	98	100.1	98	11.4	69.9	14.7	13.3	9.9	-0.0452	-1.4073	1.4524	0.937819	0.913011	2.67646	17.5403
248	-3441.21	3.86481	98.3	96.9	97.4	100.2	97.4	9.3	76	12.1	14.3	9.7	-0.0515	-1.46	1.5115	0.931895	0.94698	2.78125	17.459
249	-3441.16	3.83709	99.1	96.3	97.5	98.7	98.3	16.6	70.3	8.7	15.9	11.1	-0.4318	-1.3542	1.786	0.516478	0.968978	3.02006	21.4735
250	-3441.28	3.86923	99.3	96.7	97.6	98.5	97.8	15.5	64.3	13.5	16.4	10	-0.4218	-1.4333	1.8551	0.545215	0.978014	3.15158	24.3518
251	-3441.26	3.87123	98.6	96.3	97.9	99.3	97.8	10.1	81.2	7.5	11.7	11.5	-0.36	-1.3358	1.6958	0.575391	0.9426	2.89569	19.0209
252	-3441.22	3.86082	99	96.5	97.8	99.7	98.2	9.6	84.9	3.4	11.3	11.1	-0.0412	-1.4156	1.4568	0.94341	0.978633	2.68817	18.4178
253	-3441.24	3.86085	99.6	96.5	97.9	99.6	97.7	15.5	77.3	3.6	13.4	11.4	0.0428	1.6477	-1.6905	0.949366	0.970619	-3.12392	18.9783
254	-3441.24	3.86925	98.9	96.2	97.4	100.3	97.8	10.9	81.2	6.4	13.3	10.6	-0.0231	-1.3095	1.3325	0.965347	0.921641	2.47204	18.6348
255	-3441.23	3.86979	99.2	95.9	97.4	99.3	98.2	9.3	74.8	13.3	11.1	13.4	-0.3432	-1.409	1.7522	0.608223	0.90097	3.0094	24.4907
256	-3441.15	3.86449	98.9	96.4	97.8	99.3	98.1	9.4	85.4	4.9	9.5	11.2	-0.3973	-1.2732	1.6705	0.52431	0.983718	2.82829	18.6714
257	-3441.14	3.83369	99.1	96.7	97.7	99.5	97.6	16.8	69.3	12.1	15.2	9.7	-0.4842	-1.1207	1.6048	0.396617	0.973387	2.66785	18.6761
258	-3441.16	3.84745	99.5	95.9	97.5	99.6	97.9	10.4	85.4	6.2	9.6	12	-0.2912	-1.2578	1.549	0.624066	0.976767	2.66798	17.0053
259	-3441.18	3.85058	98.4	96.5	97.9	98.6	98.1	26.2	41.7	12	31.5	10.7	-0.6858	-1.7063	2.392	0.426617	0.924319	3.99202	19.783
260	-3441.25	3.85763	99.2	96.5	97.6	99.3	97.6	17	67.2	10.2	15.1	10.9	-0.5177	-1.4772	1.9949	0.480983	0.959706	3.35501	18.7082
261	-3441.24	3.88253	98.8	96.4	97.5	98.9	97.4	9.7	71.9	16.7	10.5	10.4	-0.1539	-1.2536	1.4074	0.78133	0.943737	2.50199	18.8014
262	-3441.2	3.86202	98.8	96	97.3	99.1	98.3	11.3	75.3	10.7	12.8	10.2	-0.0966	-1.4246	1.5212	0.872934	0.946976	2.76046	21.765
263	-3441.14	3.84624	98.8	96.8	97.6	99.4	97.8	14.3	66	15	16.5	10.2	-0.382	-1.3017	1.6836	0.546244	0.970297	2.8607	20.2726
264	-3441.23	3.84932	98.6	96.8	97.2	99.8	97.9	21.4	60.5	9.7	20.2	10.4	-0.3336	-1.6823	2.0159	0.669005	0.936188	3.50191	27.2621
265	-3441.18	3.86057	99.1	97.1	98.1	98.9	97.7	10.9	79.4	3.6	11.4	15.6	-0.0046	-1.6404	1.645	0.994434	0.99316	3.07373	19.4064
266	-3441.14	3.85009	98.8	96.6	97.9	99.7	98	20	61.8	6.6	21.6	13	-0.5371	-1.547	2.0841	0.484559	0.991903	3.50684	20.664
267	-3441.19	3.86876	99	96.3	97.1	98.9	97.5	18.6	62.6	13.9	15.4	11.4	0.8368	1.023	-1.8598	0.100101	0.888586	-3.01878	24.074
268	-3441.17	3.87358	99.4	96.1	97.5	99.4	98.4	12.7	69.4	13	13.6	10.5	-0.2097	-1.623	1.8327	0.771128	0.93793	3.25082	19.9817
269	-3441.18	3.85455	98.6	96.8	97.6	99.6	98.1	20.2	63	5	14.9	18.4	-0.4761	-1.3188	1.7949	0.469477	0.917099	3.01355	77.5336
270	-3441.28	3.87145	99.6	96.4	96.9	98.9	97.7	12	78.3	8.6	9.6	12	-0.0382	-1.3607	1.399	0.94535	0.927328	2.58264	17.5154
271	-3441.19	3.87785	99.5	96.4	97.7	99.1	97.7	11.3	78.9	5.2	11.5	12	-0.1034	-1.4738	1.5772	0.868944	0.945519	2.85935	18.5603
272	-3441.23	3.86085	99.2	96.8	97.7	99.4	98.1	8.6	85.7	6	10.5	10	-0.1744	-1.425	1.5995	0.781885	1.02213	2.84369	27.7277
273	-3441.24	3.85424	98.6	96.5	97.5	99.8	97.6	9.3	82.9	7	11.6	11.2	-0.2139	-1.3372	1.5511	0.724198	0.951388	2.72432	21.0835
274	-3441.22	3.87714	99	96.3	97.5	99.3	98.6	13.1	67.5	16.4	10.4	12	-0.2383	-1.3081	1.5464	0.691799	0.924385	2.69835	18.8172
275	-3441.14	3.86849	98.8	96.1	97.8	99.5	98.1	12.4	75.3	8.2	12.3	12.1	-0.1068	-1.5151	1.622	0.868282	0.895708	2.94008	20.5835
276	-3441.21	3.88382	99.6	96.3	97.4	100	97.7	12.8	65.1	16.1	13.8	11.2	0.0327	1.698	-1.7307	0.962194	0.910689	-3.20814	18.8618
277	-3441.19	3.90868	99	96.3	97.8	99.8	98.4	10.8	74.4	7.8	13.1	11.3	0.0941	1.1796	-1.2737	0.852223	0.891185	-2.30031	19.5823
278	-3441.21	3.84882	98.7	96.9	97.3	98.7	98.1	18.7	69.3	8.6	15.4	10.8	-0.3789	-1.3603	1.7392	0.564297	0.989405	2.96411	19.7005
279	-3441.16	3.87925	98.8	96.8	97.5	99.7	98.4	15.5	71	7.9	14	10.9	-0.1205	-1.4138	1.5343	0.842899	0.929995	2.76507	18.0072
280	-3441.18	3.85169	98.7	96	97.6	99.4	97.7	14.1	77.7	5	14	11.7	-0.3109	-1.4877	1.7986	0.654309	0.959898	3.11562	18.0613
281	-3441.21	3.89277	98.4	96.1	98.2	100	98.2	8.6	79.9	8	10.6	12	-0.4059	-1.4901	1.896	0.571802	0.940981	3.23547	19.7806
282	-3441.26	3.86014	99.5	96.8	97.5	99.5	97.7	9	85.9	5	10.7	10.4	-0.1363	-1.4609	1.5973	0.829313	0.953106	2.86967	17.6072
283	-3441.16	3.91305	99	96.3	98.1	99.8	98.3	9.8	76.7	6.2	11.7	12.1	-0.1752	-1.3553	1.5306	0.771051	0.902874	2.71484	16.3307
284	-3441.21	3.84247	99.2	96	97.4	99.2	98.1	12.4	79.1	8.3	11.9	11.2	-0.2565	-1.246	1.5025	0.658599	0.933909	2.60485	32.4994
285	-3441.18	3.86429	99.4	96.4	97.9	98.9	98	14.1	73.3	9.4	14.5	9.7	-0.492	-1.5739	2.066	0.523696	0.978606	3.49745	18.7433
286	-3441.22	3.86551	99.3	96.7	96.9	99.3	98.1	18.4	55.1	18.1	19.5	10.6	-0.5609	-1.3365	1.8974	0.408753	0.952922	3.15904	21.7212
287	-3441.24	3.89381	98.9	96.6	97.8	99.3	98.4	11.3	71.1	13.2	10.7	11.4	-0.2431	-1.2606	1.5037	0.676719	0.930666	2.61606	21.4053
288	-3441.2	3.8392	99.6	96.5	97.8	98.7	98.1	19.5	67.4	4	20.5	11.8	0.0872	1.7831	-1.8703	0.906741	0.954581	-3.42089	27.0468
289	-3441.18	3.87387	99.4	96.4	97.6	99.1	97.5	12	80.3	3.7	13.7	10.4	-0.0369	-1.671	1.708	0.956737	0.953929	3.16188	21.2034
290	-3441.22	3.8933	99.8	96.4	97.7	99.3	98	13	76.7	6.3	11.9	11	0.0866	1.5024	-1.589	0.891027	0.868697	-2.89556	17.904
291	-3441.2	3.87287	99.1	96.1	97.6	99.8	97.6	9.7	68.1	18.6	11.3	12	-0.0012	-1.4049	1.4061	0.998284	0.923553	2.62983	20.6148
292	-3441.15	3.86205	99.9	95.9	97.4	99.1	97.8	13.1	80.9	6.7	10.3	11.1	-0.0503	-1.3223	1.3726	0.926677	0.878845	2.52255	17.1079
293	-3441.22	3.87139	98.9	96.5	97.6	99.1	97.9	10.8	76.3	12	10.8	10.4	-0.109	-1.2952	1.4042	0.844784	0.924175	2.53157	18.5212
294	-3441.22	3.85856	98.9	97	97.4	98.8	97.7	14.9	59	18.1	18.3	11.6	0.5498	1.25	-1.7998	0.388993	0.980576	-2.98915	23.6916
295	-3441.15	3.89627	100	96.9	97.1	98.7	97.9	12.6	71.2	15.2	9.6	11.3	-0.0407	-1.5293	1.57	0.948196	0.912876	2.90035	18.862
296	-3441.2	3.88741	100.1	95.7	97.9	99.1	98.3	12.5	75.8	7.4	10.8	12.9	-0.3436	-1.3537	1.6974	0.595078	0.877626	2.90828	18.8567
297	-3441.15	3.81586	98.7	96.4	97.6	98.9	97.8	36.8	35.9	4.4	34.5	14.2	-0.3223	-1.9304	2.2527	0.713888	0.954144	3.9482	100.075
298	-3441.22	3.8903	99	96.2	98	99.2	98.3	13.7	74.2	6.6	13	11.3	-0.2471	-1.3145	1.5616	0.683502	0.928694	2.72037	20.9471
299	-3441.16	3.89617	99.4	96.3	97.9	99.3	98.3	13.5	71.9	10.2	11.8	11.7	-0.0461	-1.6265	1.6726	0.944927	0.882187	3.08748	18.7031
300	-3441.3	3.88905	99.4	96.7	97.8	99.9	97.7	11.7	74.1	9.8	12.3	11.6	0.2798	1.2445	-1.5243	0.632925	0.853589	-2.62977	16.7169
301	-3441.19	3.82568	98.9	96.5	97.4	98.6	97.7	18.9	73.9	7.6	12.7	11.3	-0.4312	-1.402	1.8332	0.529566	0.969022	3.10642	34.591
302	-3441.18	3.85656	100.1	96.1	97.2	99.1	97.6	11.3	62.8	23.3	10.1	14.6	-0.3984	-1.2436	1.6419	0.514728	0.869182	2.7757	42.906
303	-3441.23	3.86716	98.6	96.6	97.8	99.1	98	13.6	71.5	9.5	15.4	10.5	-0.5558	-1.3621	1.9179	0.420388	0.9452	3.19801	24.3228
304	-3441.2	3.85774	99.3	96.5	97.5	99.3	98.1	16.6	69.2	8.6	16	10.8	-0.2257	-1.6116	1.8373	0.754285	0.965687	3.24729	18.9279
305	-3441.15	3.88773	99.6	96.1	97.5	99.2	98	11.8	66.5	15.3	13	13.5	-0.1115	-1.5919	1.7035	0.869052	0.851695	3.08836	20.3082
306	-3441.13	3.85155	98.5	96.9	97.6	98.8	97.6	11.2	83.2	5.9	10.8	10.1	-0.2021	-1.3285	1.5306	0.735893	0.992631	2.69484	21.7175
307	-3441.2	3.83143	99.3	96.7	97.5	98.9	98.1	30.5	44.6	3.8	34.8	9.8	-0.5087	-1.878	2.3867	0.573707	1.04704	4.07423	33.6119
308	-3441.21	3.86098	98.8	96.3	97.7	99.5	97.7	10.9	83.6	5.3	11.4	10.3	-0.249	-1.4351	1.6841	0.704271	0.963965	2.94593	19.0186
309	-3441.21	3.86028	98.5	97	97.6	99.7	97.7	8.1	78.5	8.5	11.5	15	-0.3406	-1.3704	1.711	0.60187	0.998496	2.93515	19.2766
310	-3441.22	3.87913	99.2	96.1	97.6	99.4	98.1	11.2	80.1	6.4	11.9	9.9	-0.01	-1.6352	1.6452	0.987856	0.910578	3.06905	17.4919
311	-3441.16	3.87815	99.5	96	98.1	99.7	98	12.7	75.2	8.1	12.7	11.2	-0.0817	-1.4829	1.5645	0.895589	0.894862	2.85412	18.0597
312	-3441.13	3.83611	99.1	96.5	97.6	99.3	98.3	24.9	63.1	4.2	19.6	10.5	-0.3043	-1.7117	2.016	0.698158	1.03089	3.52216	25.5819
313	-3441.18	3.85375	98.6	96.5	97.7	99.1	98	9.1	79.6	10.8	11.6	10.8	-0.2693	-1.3148	1.5841	0.65999	0.9772	2.74695	19.4222
314	-3441.22	3.86961	98.9	97.5	97	99.2	98	10.4	72.8	13.4	11.2	11.4	0.204	1.4045	-1.6085	0.746392	0.919084	-2.83819	22.0175
315	-3441.32	3.86984	99	96.2	97.5	100.5	97.9	8.6	85.4	4.3	11.7	11.3	-0.2053	-1.3575	1.5628	0.737211	0.947905	2.75234	19.2263
316	-3441.2	3.83241	98.8	97.1	97.2	98.9	98	29.3	50.2	5.4	28.7	10.2	-0.5563	-1.739	2.2953	0.515297	0.981161	3.88048	21.5515
317	-3441.21	3.89015	99.1	95.6	97.6	99.7	97.6	17.1	61.7	8.8	16.2	14.6	-0.3594	-1.5284	1.8878	0.619283	0.840483	3.2487	18.3583
318	-3441.22	3.86907	99.1	96.5	97.8	99.5	97.7	13.4	77	3.6	14.5	11.5	0.1849	1.3807	-1.5656	0.76384	0.941686	-2.77268	17.9911
319	-3441.18	3.90131	98.9	96.8	97.2	98.8	97.8	10.9	67.8	14.8	11.6	12.4	-0.3758	-1.248	1.6238	0.53711	0.912409	2.75489	20.9451
320	-3441.09	3.86687	99	96.3	97.5	99.1	97.9	11.2	75.4	9.4	12	12.6	-0.2646	-1.2888	1.5534	0.659313	0.929987	2.69346	21.4896
321	-3441.12	3.9012	99.2	96.2	98.2	98.7	98.3	12.4	67.8	14.7	12.3	10.4	0.0677	1.7213	-1.789	0.924346	0.884632	-3.28594	16.7835
322	-3441.18	3.88158	99	96.8	97.6	99.2	98	8.9	83.7	6.7	9.8	9.4	-0.1463	-1.4571	1.6034	0.817479	1.00079	2.87304	17.4732
323	-3441.18	3.84839	99.6	96.4	97.8	99.3	97.7	12.5	80.4	5.8	12.3	11.3	-0.2854	-1.4971	1.7825	0.679751	0.996873	3.10299	19.9831
324	-3441.2	3.86816	98.5	96.5	97.9	99.4	97.8	8.8	74.4	5.6	13.5	17.5	-0.4895	-1.3162	1.8058	0.457804	0.943391	3.02666	24.9821
325	-3441.18	3.86068	99.4	96.7	97.7	99.1	98.6	10.7	81.8	4.2	13.1	10.8	-0.2522	-1.3619	1.6141	0.687529	1.01694	2.81415	17.4956
326	-3441.24	3.85559	99.4	96	97.3	98.9	98	10.3	84.9	4.2	10.7	11.3	-0.0651	-1.4295	1.4946	0.912847	0.946628	2.73771	21.3107
327	-3441.11	3.84506	97.8	96.7	98.4	99	97.9	28.9	47.2	10.1	26.1	10.4	-0.7757	-1.4899	2.2656	0.315248	1.01356	3.73158	53.6281
328	-3441.2	3.8712	98.9	96.2	97.6	99.3	98.5	9.7	84.3	3.8	11.9	10.5	-0.0362	-1.477	1.5132	0.952148	0.940599	2.79815	17.3922
329	-3441.24	3.85577	98.5	96.5	98.3	99.1	98.2	17.6	63.3	8.2	19	13.5	-0.4063	-1.3585	1.7648	0.539511	0.983529	2.99534	23.6492
330	-3441.2	3.89207	98.9	96.3	97.3	99.8	97.9	10.7	74.7	8.8	12.7	12.4	0.1323	1.38	-1.5123	0.824974	0.855752	-2.71438	18.9278
331	-3441.21	3.85696	99.6	96.4	97.9	99.4	98.1	10.4	85.4	5.6	9.9	10.8	-0.3637	-1.229	1.5927	0.543304	0.997378	2.70481	18.8611
332	-3441.19	3.88962	99	96	98	100.1	98	9.8	77.2	6.8	12.6	12.7	-0.2296	-1.3187	1.5483	0.703372	0.914735	2.70796	15.4356
333	-3441.22	3.86188	99.6	96.6	97.8	99.2	97.8	8.6	86.6	3.8	10.9	11	-0.265	-1.591	1.856	0.714433	0.95827	3.25332	18.5192
334	-3441.15	3.8914	99.2	96.4	98.1	99.6	98.1	10.1	72.3	8.7	13.4	13.5	0.0633	1.4281	-1.4914	0.915144	0.931561	-2.73334	17.029
335	-3441.18	3.89018	99	96.2	97.7	99.5	98	13.3	73	9.2	12.8	11	-0.0992	-1.5428	1.6421	0.879118	0.912081	2.98403	18.4132
336	-3441.25	3.82659	98.5	96	97.1	99.1	98.6	23.3	56.6	11	22	13	-0.7113	-1.2684	1.9797	0.281418	0.912107	3.25008	21.4789
337	-3441.24	3.86219	99.5	96.5	97.3	99.1	98.1	9.9	81.3	9.1	10	10.7	-0.213	-1.3731	1.5861	0.731373	0.96953	2.78994	18.7873
338	-3441.28	3.89209	100	96.8	97.6	99.1	98.4	10.2	67.6	20.2	10.9	10.5	-0.1899	-1.3875	1.5775	0.7592	0.97294	2.79099	19.7346
339	-3441.18	3.85178	98.9	96	97.3	100.4	98.3	12.4	76.7	6.4	12.7	13.8	-0.4749	-1.2362	1.7112	0.444882	0.961037	2.86284	39.462
340	-3441.15	3.90385	99.4	96.5	97.2	99.3	97.9	11.7	76.5	8.3	10.2	11.5	0.0347	1.3289	-1.3637	0.949074	0.878815	-2.51973	16.5667
341	-3441.26	3.9288	99.2	96.7	98.1	99.8	98.1	11.5	73.4	6.9	11.9	12	0.156	1.2262	-1.3822	0.77429	0.854314	-2.45335	17.8964
342	-3441.13	3.86723	98.5	96.9	97.6	99.4	97.9	9.9	74	14.1	14.5	8.9	-0.0521	-1.4667	1.5187	0.931424	0.989376	2.79429	18.59
343	-3441.22	3.86824	99.1	96.2	97.9	99.2	97.8	9.4	75	12.9	11.7	12	-0.2763	-1.4773	1.7536	0.684928	0.935911	3.05573	18.3917
344	-3441.16	3.87962	99.1	96.6	98.3	99.9	98.6	10.4	76.4	6.6	12.5	13.7	-0.2592	-1.4274	1.6867	0.692602	0.935283	2.94361	20.3827
345	-3441.2	3.85942	98.7	95.3	97.6	99.7	97.9	10.6	77.5	8.4	14.2	12.4	-0.2206	-1.2747	1.4953	0.704939	0.894662	2.61605	21.8848
346	-3441.17	3.80464	98.7	96.9	97	99	98.1	24.3	52.4	5.4	28.4	13.8	-0.8552	-1.4278	2.283	0.250803	0.96522	3.73808	27.1624
347	-3441.21	3.87297	99.5	95.9	97.8	99.5	98	9.7	83.1	4	12.2	11.9	-0.084	-1.4303	1.5143	0.88901	0.939311	2.75822	18.7268
348	-3441.24	3.83339	98.7	96.3	98.1	100.1	97.7	8.8	77.4	13.1	12.7	13.1	-0.2627	-1.2202	1.4829	0.645713	0.940842	2.56452	20.5062
349	-3441.22	3.85559	99.1	96.8	97.6	99.1	97.9	9.8	85.7	3.5	9.1	12.7	-0.278	-1.3955	1.6736	0.667726	0.995094	2.9065	20.2684
350	-3441.26	3.87274	98.9	96.3	97.5	99.1	97.8	9.6	83.3	4.7	11.3	11.2	-0.1645	-1.4282	1.5927	0.793434	0.930003	2.83886	18.67
351	-3441.21	3.86032	98.9	95.9	98	99.2	98.3	13.3	77.8	5.8	14.7	10.6	-0.2247	-1.5774	1.8021	0.750591	0.974392	3.18264	18.9459
352	-3441.23	3.88421	99.6	96.8	97	99.6	98.3	14.6	48.4	30.9	12	13.7	0.0937	1.6427	-1.7364	0.892046	0.878502	-3.16504	36.1331
353	-3441.17	3.8568	99.1	96.4	97.8	99.2	98.2	10.3	80.5	10.2	10.4	10.1	-0.0471	-1.4615	1.5086	0.937598	0.944468	2.77971	20.4809
354	-3441.18	3.88199	99.7	96.3	97.9	99.6	98.4	13.8	75	6.9	11.3	11.8	0.0496	1.5879	-1.6374	0.939473	0.90227	-3.01851	23.832
355	-3441.21	3.86944	99.4	96.8	97.4	99.2	97.9	12.5	71.8	13.2	12.1	11	-0.1528	-1.4331	1.5859	0.807354	0.953972	2.83528	18.4486
356	-3441.19	3.8499	98.7	95.9	97.8	99.6	98	15.3	68.1	11.1	16.1	12.7	-0.3914	-1.3867	1.7781	0.559738	0.918345	3.02797	19.9981
357	-3441.18	3.90507	99.7	96.4	97.7	99.5	98.3	9.5	70.9	14.3	11.5	10.5	0.0001	1.3815	-1.3817	0.99981	0.91944	-2.58514	19.1261
358	-3441.24	3.85957	99	96.2	97.6	99.4	97.6	10.3	78.6	10.6	11.9	10.3	0.0849	1.5266	-1.6115	0.894656	0.923996	-2.93914	18.8442
359	-3441.16	3.88875	100	96.1	97.7	99.8	98.1	10.5	75.2	9.2	12.3	12.8	-0.091	-1.3118	1.4028	0.870244	0.848263	2.54398	18.9997
360	-3441.23	3.86103	99.2	96.7	97.3	99.6	98.2	12.3	75.1	5.8	17.8	12.3	-0.2198	-1.4099	1.6297	0.730287	0.942376	2.86593	18.3864
361	-3441.21	3.87225	99.1	96.2	98.1	99.3	97.9	9.7	81.2	7.1	10.6	10.3	-0.2739	-1.4384	1.7122	0.680108	0.964591	2.9808	18.9674
362	-3441.23	3.8633	98.7	96.5	97.5	99.2	98	15.7	67.9	12.8	14.4	11.2	-0.4108	-1.3792	1.79	0.541007	1.00229	3.03878	21.993
363	-3441.23	3.8472	99	96.4	97.3	99.3	97.7	19.9	57.8	8.6	23.3	13.1	-0.7553	-1.3793	2.1345	0.292345	0.906526	3.50782	20.9735
364	-3441.19	3.87267	99.8	96.5	98	99.7	97.7	10.4	78.9	6.7	11	13.1	-0.0757	-1.6237	1.6993	0.910949	0.929519	3.11133	17.6626
365	-3441.25	3.86537	98.7	96.7	98.2	98.9	98.2	8.6	78	10.1	11.2	11.5	-0.3446	-1.5059	1.8505	0.627586	1.01257	3.18939	26.319
366	-3441.19	3.86867	98.8	96.8	97.9	99.3	98.5	22.8	57.4	8.4	21.6	11.5	-0.4955	-1.5648	2.0602	0.519036	0.952222	3.4852	21.3441
367	-3441.23	3.87537	99.2	96.4	97.3	99.5	97.6	9.2	82	4.5	11.5	13.6	-0.2024	-1.4899	1.6924	0.760753	0.920601	2.99524	18.2676
368	-3441.27	3.87671	98.5	96.4	97.7	99	98.2	8.7	79.8	9.4	10.6	11.5	-0.1191	-1.4494	1.5684	0.848152	0.982565	2.82993	17.1047
369	-3441.25	3.83222	99	96.9	97.4	99	98.2	36.2	34.3	7.4	34.5	12	-0.8666	-1.6524	2.5191	0.311933	0.971818	4.1477	30.0255
370	-3441.17	3.88392	99.4	96.7	97.8	99.3	97.8	10.4	76.2	11.8	10.7	10.5	-0.1465	-1.5558	1.7023	0.827829	0.979945	3.0574	17.6483
371	-3441.18	3.87307	99.1	95.8	97.7	99.4	98	10.2	83.4	3.4	11	11.7	-0.1302	-1.4002	1.5304	0.829885	0.991208	2.74991	18.7258
372	-3441.18	3.8524	99.4	95.7	96.9	99	98.4	13.3	80.7	6.6	10.8	11.3	-0.0416	-1.3174	1.3591	0.938747	0.888022	2.50496	17.9514
373	-3441.16	3.86123	99.3	96.1	97.4	99	97.7	9.8	83.6	4.3	12.2	10.2	-0.054	-1.4882	1.5422	0.92996	0.947573	2.83645	18.7567
374	-3441.21	3.87008	99.2	96.6	98.1	99	98	14	72.4	6.5	15	12.4	0.2898	1.5613	-1.8511	0.686869	0.969987	-3.22689	22.2209
375	-3441.21	3.90822	99.6	96.3	98	99.8	98.7	9.2	76.2	9.6	12	10.9	-0.1053	-1.483	1.5882	0.867443	0.914278	2.87839	17.0442
376	-3441.22	3.87381	99.5	96.6	97.7	99.6	97.9	8.9	83.8	3.1	12.3	11.4	-0.0126	-1.4982	1.5108	0.983288	0.990499	2.81519	18.7681
377	-3441.24	3.87974	100	96	97.4	99.7	98.2	10.9	66.6	21.7	10.6	9.7	-0.1535	-1.4644	1.6179	0.810295	0.960272	2.89444	18.763
378	-3441.19	3.87326	99.8	96.2	97.2	99.2	98	16.1	67.4	11.5	14.7	11.8	-0.4646	-1.5019	1.9664	0.527509	0.931963	3.33102	21.9788
379	-3441.21	3.86831	99.8	96.2	97.3	100.1	98.1	10.6	77	12	11.1	10.1	0.1377	1.2329	-1.3706	0.799084	0.901402	-2.44589	20.2533
380	-3441.19	3.89851	99.3	96.6	98	99.2	98.1	11.8	69	16.2	11.1	10.6	0.0706	1.4855	-1.5561	0.909299	0.893571	-2.84787	18.8282
381	-3441.27	3.90417	99.5	96.4	97.8	99.3	98.4	10.8	73.7	10.8	9.9	11.6	-0.2468	-1.5496	1.7963	0.725256	0.906709	3.15577	18.5057
382	-3441.24	3.86293	98.8	96.3	97.7	99.3	97.5	10.4	75.2	15.1	9.9	9.9	-0.1788	-1.5473	1.726	0.792876	0.992285	3.0761	23.1667
383	-3441.23	3.89224	100	96.4	97.8	99.6	97.9	9.7	78.1	7.3	11	11.9	-0.029	-1.565	1.594	0.96358	0.930195	2.95582	16.6708
384	-3441.27	3.87387	99.6	96.3	98	99.7	97.9	13.4	78.4	7.1	11	10.7	-0.1567	-1.6269	1.7836	0.824338	0.961166	3.20084	22.186
385	-3441.21	3.85676	99	96.1	98.1	99.6	98.3	11.4	82.2	4.3	12.6	11	-0.2295	-1.5689	1.7984	0.744787	0.984189	3.17214	24.2482
386	-3441.21	3.86959	98.9	96.6	97.6	99	97.5	9.1	76.9	10.8	11.4	12.4	-0.1854	-1.5161	1.7015	0.782029	0.974282	3.02528	27.97
387	-3441.19	3.83535	98.9	96.5	97.5	99.1	97.4	12.5	79.9	3.9	14	13.6	-0.1511	-1.4655	1.6166	0.813038	0.950867	2.89389	21.8745
388	-3441.31	3.8878	99.4	96.5	97.4	99.2	98.1	10.4	79.4	6	13.4	11.1	0.1799	1.4242	-1.6041	0.775702	0.872481	-2.84808	17.9376
389	-3441.25	3.79899	98.4	96.8	96.6	99.6	97.8	41.6	31.3	4	36.6	13.7	-0.9421	-1.5334	2.4756	0.23886	0.981878	4.04947	28.7126
390	-3441.18	3.89523	99.7	96	97.9	98.8	98	11.8	72.7	11.3	10.1	12.2	0.0505	1.4161	-1.4666	0.931099	0.886694	-2.69813	15.3118
391	-3441.24	3.87511	98.7	96.4	97.5	99.1	98	15.4	71.6	9.7	13.4	10.8	-0.4826	-1.385	1.8676	0.483217	1.0014	3.14193	19.9445
392	-3441.18	3.88985	98.8	95.7	97.4	99.5	97.8	10.7	75	9.4	11.4	13.4	-0.4025	-1.2005	1.603	0.497779	0.871185	2.70269	16.4184
393	-3441.23	3.88942	99.7	95.9	97.8	98.9	98	11.6	79.3	6.4	10.5	12	-0.0966	-1.3231	1.4197	0.863949	0.883251	2.57086	19.2654
394	-3441.16	3.84965	98.5	95.9	97.6	99.6	98.2	13	67.5	11.1	17.9	12.6	-0.5757	-1.1924	1.7681	0.348824	0.975588	2.92256	24.2898
395	-3441.23	3.90396	99.6	96.9	97.9	99.6	98	12.2	68.7	13.9	11.6	12	0.0132	1.5178	-1.531	0.98273	0.90367	-2.85245	17.6706
396	-3441.2	3.87705	99.1	96.6	98.1	100	97.9	8.8	78.6	9.9	12.1	9.5	-0.0702	-1.5763	1.6465	0.914679	0.944596	3.01728	18.3395
397	-3441.15	3.87494	99.3	96	97.8	99	98.2	12.4	77	6.6	11.9	12.3	-0.1972	-1.5299	1.7272	0.771606	0.893745	3.06399	18.189
398	-3441.26	3.85067	99.2	96.5	97.4	99.3	97.9	15	59	14.8	22.8	10.6	-0.7317	-1.4155	2.1471	0.318475	0.959719	3.53762	25.4004
399	-3441.15	3.83747	98.6	96.8	97.8	98.6	98.3	24.2	54.6	6.4	26.6	10.8	-0.5123	-1.5663	2.0785	0.507083	1.00233	3.50955	24.966
400	-3441.17	3.85456	99.6	96.1	97.4	98.8	98.2	12.1	78	6.2	13.4	12	-0.3568	-1.3901	1.7469	0.59146	0.973778	2.99124	35.6438
401	-3441.2	3.8666	98.6	96	98.1	99.8	98.4	8.8	81.7	6.5	10.8	12.7	-0.2228	-1.4513	1.6741	0.733836	0.974591	2.94616	17.2659
402	-3441.17	3.8766	99.1	96.6	97.5	99.6	98.2	11	72.1	10.2	15.3	11.7	-0.2771	-1.3541	1.6312	0.660231	0.94067	2.82882	18.922
403	-3441.16	3.87998	99.4	96.5	97.6	99.5	97.5	11.5	73.1	10.1	12.8	11.5	-0.2142	-1.4667	1.681	0.745094	0.942945	2.96527	18.5891
404	-3441.23	3.88636	99.4	96.5	97.7	99.1	98.3	11.6	78.2	7.4	10.7	11.8	-0.0809	-1.3946	1.4755	0.890306	0.940044	2.68843	18.3925
405	-3441.24	3.88758	99.4	96	97.5	99.8	98.4	10.8	74.9	10.3	11.1	12	-0.0538	-1.5526	1.6064	0.933006	0.925232	2.95668	20.7124
406	-3441.24	3.88472	98.9	96.6	98	99.3	98.4	10.5	76.6	6.6	15	11.1	-0.2671	-1.5051	1.7721	0.69861	0.956887	3.09642	18.4325
407	-3441.18	3.88896	99	96.2	97.8	100.1	97.2	10.5	77	7.8	11.8	12.5	-0.009	-1.2226	1.2316	0.98536	0.851675	2.29617	15.9712
408	-3441.24	3.86926	99.3	96.4	98	99.2	98.2	9.5	79.9	8	10.6	11.9	-0.1573	-1.4173	1.5745	0.800227	0.954566	2.81061	18.4648
409	-3441.22	3.88996	99.6	96.5	98	99.3	98.1	9.9	76.3	10.4	11.7	10.6	0.0005	1.5628	-1.5633	0.999396	0.905109	-2.92463	18.7307
410	-3441.17	3.87101	99.5	96.7	97.6	99.3	97.7	11.2	79.2	6.9	11.6	11.9	-0.0151	-1.3692	1.3843	0.978207	0.901905	2.57615	14.3511
411	-3441.25	3.8658	99.6	96.8	97	99.5	97.8	9.8	79.3	10	12.2	10.3	-0.0233	-1.5702	1.5935	0.970721	0.938602	2.96015	28.2249
412	-3441.26	3.86779	99	96.5	97.6	99.7	98.4	9.8	78.8	11.4	11.6	9.7	-0.0692	-1.5273	1.5966	0.913286	0.963568	2.92476	17.7913
413	-3441.22	3.8966	98.9	96.4	97.8	99.7	98.1	10.3	79.8	5.4	13.3	10.9	0.2348	1.3008	-1.5356	0.694208	0.89221	-2.6808	18.6279
414	-3441.18	3.87146	99.5	95.4	97.3	99.1	97.2	11.1	78.6	7.2	10.5	14.3	-0.3094	-1.1951	1.5045	0.588663	0.845484	2.57488	17.321
415	-3441.18	3.88649	98.1	96.4	97.3	99.4	98.2	10	73.6	12.2	11.8	10.7	0.0365	1.3106	-1.3471	0.945882	0.90274	-2.4872	18.748
416	-3441.26	3.85473	98.7	96.8	97.3	99.1	98.1	9.9	83.8	5.1	12	11.4	-0.3804	-1.2142	1.5946	0.522927	1.02461	2.69911	18.4832
417	-3441.27	3.85834	99.1	97.3	97.6	98.6	98.5	17.9	66	6.7	18.5	11.8	-0.3369	-1.4692	1.8061	0.626964	0.983415	3.11256	30.0122
418	-3441.2	3.88575	99.5	96.4	98.1	99.2	97.4	10.1	79.1	5.2	13.9	11.9	-0.1086	-1.4451	1.5536	0.860244	0.914507	2.81101	16.6118
419	-3441.24	3.87928	99.2	96.8	97.6	99.5	97.7	10.2	65.1	18.3	11.4	15.6	-0.0305	-1.485	1.5156	0.959689	0.919265	2.80772	27.4797
420	-3441.16	3.88103	99.2	96.3	98	99.5	98	10.3	80.7	3.8	12.1	13.3	-0.253	-1.3046	1.5576	0.675151	0.933985	2.70898	18.4516
421	-3441.26	3.85072	98.9	95.8	97.8	99.4	97.9	7.8	85.9	3.6	13.2	11.3	-0.3127	-1.5191	1.8318	0.658573	0.96258	3.17573	21.6266
422	-3441.24	3.89499	99.1	96.2	97.8	99.8	98.1	11.9	78.4	6.6	11.8	9.8	-0.0304	-1.4129	1.4433	0.957852	0.926124	2.67264	19.2316
423	-3441.17	3.87398	99.3	96.2	97.8	99	98.2	10.6	79.9	9.2	9.4	11.3	-0.327	-1.3121	1.639	0.60101	0.976305	2.81132	18.7779
424	-3441.23	3.87462	99.4	96.2	97.2	99	98	11.6	73.9	12.5	11.7	11.8	-0.1556	-1.246	1.4017	0.777915	0.90459	2.48995	18.7989
425	-3441.21	3.89588	99.7	96.4	97.6	99.4	98	13.8	69.1	10.8	13.4	11.4	-0.13	-1.431	1.561	0.833407	0.872633	2.80718	20.0401
426	-3441.24	3.8888	99.3	96.2	98.2	99.2	98.2	13.3	69	14.4	11.1	10.9	-0.1433	-1.3653	1.5086	0.809968	0.931678	2.69877	19.2984
427	-3441.22	3.87853	99	96.7	97.9	99.4	98.3	11.6	78.9	9.7	11.3	8.9	-0.0306	-1.7292	1.7598	0.965233	0.991409	3.26455	24.3792
428	-3441.2	3.85873	99.3	96.3	97.5	99.7	98.1	13	75.4	6.9	11.6	13.1	-0.4219	-1.3304	1.7523	0.518452	0.96699	2.96395	21.5729
429	-3441.15	3.8441	98.8	96.8	97.9	98.5	98	30	46.1	6.1	30.4	9.8	-0.7147	-1.7196	2.4343	0.412813	1.03217	4.05512	21.1831
430	-3441.26	3.83966	98.7	96.7	97.8	99.6	97.9	19.8	64.4	6.6	21.3	11.2	-0.4684	-1.5061	1.9745	0.525557	0.972681	3.34364	21.5596
431	-3441.26	3.89508	99.3	96.4	97.6	99.2	98.3	10.2	74.6	13.2	10	10.1	-0.1014	-1.6108	1.7122	0.881534	0.950674	3.11319	22.0513
432	-3441.2	3.87377	99.3	95.7	97.2	99.2	98.2	15.4	68.3	8.9	16	12.6	-0.4186	-1.5003	1.9189	0.563713	0.869372	3.27008	18.6534
433	-3441.08	3.87435	99	96.6	97.2	98.8	97.9	10.3	67.6	19.8	11.2	11.8	-0.1411	-1.3744	1.5155	0.813749	0.899781	2.71336	20.4332
434	-3441.16	3.85516	99.3	96.3	97.5	99.5	97.8	13	80.8	4.9	13.5	10.1	-0.0531	-1.6294	1.6825	0.936863	0.943339	3.09966	21.5081
435	-3441.14	3.87531	99.6	96.5	97.9	99.3	98.1	10	82	3.4	12.1	11.4	-0.1978	-1.4461	1.644	0.759302	0.973599	2.90871	18.8182
436	-3441.22	3.85597	98.5	96.9	98.1	99.5	97.9	17.7	74.2	5.6	13.9	9.7	-0.3572	-1.5265	1.8837	0.620791	1.05581	3.24253	38.9083
437	-3441.19	3.8365	98.6	96.2	97.7	98.8	97.7	13.7	68.9	4.3	13.9	19.8	0.0412	1.4599	-1.5011	0.945162	0.943778	-2.77103	19.0267
438	-3441.2	3.8535	98.9	96.4	97.5	99.1	97.6	10	80.3	8.1	11.9	11.6	-0.3042	-1.4328	1.737	0.649764	0.949788	3.00621	27.3941
439	-3441.17	3.85402	98.7	96.1	96.9	99.6	97.3	10.9	79.7	5	14.5	12.3	-0.0078	-1.4274	1.4352	0.989189	0.824478	2.67818	21.6867
440	-3441.29	3.82883	98.7	96.2	97.9	99	97.7	23.5	50.2	15.1	22	12.4	-0.7119	-1.2041	1.916	0.256867	0.982936	3.13873	24.6449
441	-3441.17	3.86608	98.8	96.5	97.6	99.2	97.7	10.7	79.3	5.8	11.7	13	-0.0613	-1.508	1.5692	0.921932	0.918389	2.88065	21.826
442	-3441.07	3.84827	99.3	96.5	97.9	98.9	97.8	9.6	83.2	9.3	11.3	9.5	0.0134	1.4434	-1.4569	0.981542	0.982984	-2.71348	21.599
443	-3441.22	3.83815	98.8	96.3	97.5	98.9	98	24.3	58.3	5.5	21.2	12.9	-0.4487	-1.3616	1.8103	0.504263	0.93789	3.05525	33.3005
444	-3441.12	3.87686	98.7	97	96.3	100.2	98	11.1	33.4	52.7	11.1	11.7	-0.1477	-1.3708	1.5185	0.805506	0.904635	2.71365	27.4292
445	-3441.14	3.8629	98.9	96.3	97.3	99.3	97.8	9.8	83.6	4.3	11.5	12.3	-0.2929	-1.1555	1.4484	0.595533	0.884562	2.48185	21.2243
446	-3441.2	3.85224	98.5	96.9	97.1	99.6	98	11.2	76.5	7.5	17.2	10.5	-0.3994	-1.6036	2.0031	0.601167	0.97703	3.43584	21.8316
447	-3441.19	3.88695	99.1	96.6	98.1	99.7	98	9.2	82	5.8	10.4	11.7	-0.2011	-1.3515	1.5526	0.740941	0.990631	2.73649	16.5448
448	-3441.15	3.85821	99	96.5	97.4	99.3	98	13.6	69.7	8.1	13.7	15.4	-0.4753	-1.3941	1.8694	0.491462	0.940557	3.14892	38.282
449	-3441.21	3.86167	98.9	95.9	97.5	99.2	97.7	15.7	72.5	5.6	15.3	14.4	-0.0556	-1.5876	1.6432	0.93228	0.864206	3.02394	20.7375
450	-3441.25	3.8646	99	96.6	97.6	99.3	97.8	9.2	58.1	31.2	12.8	10.3	-0.0518	-1.6793	1.7311	0.94013	0.945677	3.1918	24.6915
451	-3441.23	3.83771	98.4	96	97.2	99.8	97.3	10	82.8	5.8	12.6	11.5	0.0798	1.4663	-1.546	0.89682	0.884241	-2.82117	17.0626
452	-3441.18	3.85564	99	95.8	97.5	100	97.7	11.5	78.2	8.6	12.3	12	-0.1032	-1.4376	1.5408	0.866091	0.910694	2.79155	18.8067
453	-3441.22	3.82061	98.3	96.5	97	98.7	97.6	41.2	28.5	6.6	37.4	11.3	-1.1038	-1.6447	2.7485	0.196814	0.933293	4.48249	25.8394
454	-3441.25	3.86159	99.2	96.6	97.7	99.3	97.9	10.4	76.5	13.7	10.6	10.6	-0.0771	-1.2717	1.3488	0.885675	0.963765	2.45479	17.9915
455	-3441.22	3.81776	97.9	96.8	97.3	98.6	98.4	45.5	20.8	9.5	37.2	11.8	-0.9208	-1.555	2.4757	0.256163	0.994607	4.0554	28.142
456	-3441.21	3.84276	99.1	96.2	97.5	98.5	98	10.2	83.7	4.2	13.2	11.5	-0.2675	-1.4062	1.6737	0.680312	0.953401	2.9139	21.5973
457	-3441.19	3.8509	98.6	96.3	97.6	99.3	97.8	12.8	76.7	7.1	13.2	11.5	-0.2943	-1.3982	1.6925	0.652227	0.992973	2.9307	21.5332
458	-3441.19	3.89211	99.3	96.6	97.1	99.3	97.4	12	67	18.6	10.6	10.8	0.227	1.2099	-1.4369	0.684009	0.8819	-2.50338	19.5144
459	-3441.16	3.87547	99.3	96.2	97.7	99.3	98.2	9.1	84.2	4	12.1	11	-0.0676	-1.5866	1.6542	0.918253	0.945136	3.03402	21.7552
460	-3441.15	3.85312	99.2	96.6	98.1	99.1	97.8	11.6	73.9	6.3	15.9	14.4	-0.2434	-1.3931	1.6365	0.702548	0.999737	2.86165	19.1078
461	-3441.16	3.82761	98.6	96.4	97.8	98.5	98.5	38.3	29.1	10	36.3	10	-0.8056	-1.8531	2.6587	0.393989	0.978212	4.41835	25.2276
462	-3441.21	3.88307	99	96.7	97.4	99.2	98.2	9.9	82.2	5.7	10.8	10.5	-0.0685	-1.5269	1.5954	0.914146	0.946302	2.92328	17.302
463	-3441.09	3.85077	99.5	97.1	97.7	99.1	97.9	10.9	69.1	14.1	11.3	16	-0.1616	-1.4097	1.5713	0.794269	0.972268	2.8012	18.1601
464	-3441.21	3.89761	98.9	96.2	97.9	99.5	98	14.1	69.2	7.8	15	12.2	-0.2536	-1.4937	1.7473	0.709703	0.908507	3.05991	21.4892
465	-3441.13	3.87304	98.6	97	97.5	99.8	98	9	78.3	12.1	11.8	9.2	-0.1229	-1.5442	1.6672	0.852537	0.992481	3.01108	19.6053
466	-3441.23	3.86323	99.2	96.8	97.5	99.6	97.1	12.9	70.7	6.4	16.1	15	-0.1957	-1.4159	1.6116	0.757184	0.951631	2.85011	21.1925
467	-3441.2	3.88063	98.9	96.5	97.6	99.2	97.9	13.8	72.1	9.6	12.7	10.7	-0.3306	-1.5283	1.8589	0.644283	0.956062	3.21398	18.847
468	-3441.24	3.84448	99.4	96.3	97.2	99.4	97.7	15.3	71.1	4.3	20.3	12.3	-0.1117	-1.5564	1.6682	0.866024	0.91863	3.02223	21.7765
469	-3441.18	3.85939	99	96.5	97	99.5	97.4	14.7	37.6	42.8	10.3	16.3	-0.1802	-1.4253	1.6054	0.775535	0.915237	2.8504	29.817
470	-3441.25	3.91474	99.9	96.1	97.9	100	98	12.2	71.9	10.1	12.7	11.4	0.2166	1.5202	-1.7368	0.750584	0.84957	-3.06735	16.9984
471	-3441.2	3.87888	99.1	96.4	97.3	99.5	98.3	11.7	77.1	6.7	12.5	11.6	-0.2096	-1.3965	1.6062	0.738955	0.955415	2.82973	18.8774
472	-3441.25	3.86968	99.6	97	96.8	99.5	98	11.8	41.4	41.5	11.7	13.5	0.0767	1.4761	-1.5528	0.901217	0.855633	-2.83643	25.615
473	-3441.2	3.88363	99.4	96.6	97.2	99.8	98	9.6	69	18.6	11.5	12.1	-0.1567	-1.2484	1.4051	0.777014	0.916617	2.4955	27.4414
474	-3441.23	3.84791	99.5	96.6	97.6	99.7	98.1	10.1	81	6.2	13.2	13	-0.3432	-1.3688	1.712	0.599018	0.951641	2.93551	17.503
475	-3441.27	3.89096	99.9	96.2	97.3	99.4	98.3	10.4	77.6	4.7	12.5	13.3	-0.3467	-1.2444	1.5912	0.564192	0.913083	2.71175	17.2488
476	-3441.17	3.88043	99.6	96.3	97.7	99.5	97.7	10.7	81.7	6.9	10.5	11	-0.0642	-1.4469	1.5111	0.914974	0.909811	2.76941	15.1662
477	-3441.15	3.88292	99.6	95.9	97.7	99.5	97.8	10.4	82.6	4.8	11.8	10.3	-0.0036	-1.5283	1.5319	0.995296	0.924671	2.86298	21.3883
478	-3441.23	3.8567	99.2	95.9	97.6	99.1	97.8	10.5	81.5	5.1	11.3	13.6	-0.1338	-1.2045	1.3383	0.800054	0.893003	2.38883	21.6594
479	-3441.24	3.87549	99.3	95.9	97.7	99.2	97.8	15.9	71.9	4.6	15.3	12.3	-0.3048	-1.6673	1.9721	0.690871	0.915528	3.44055	21.7604
480	-3441.15	3.81834	98.7	97.2	98.1	98.4	98.4	34.4	38.1	3.9	34.8	12.6	-0.7994	-1.4547	2.2541	0.290749	1.04479	3.70375	27.0138
481	-3441.22	3.87261	98.6	96.5	97.9	99.5	98.3	10.9	81.4	5.4	11	11	-0.2974	-1.3815	1.6789	0.645679	0.956845	2.90346	17.8758
482	-3441.21	3.87579	98.8	96.7	98.1	99.7	97.7	9.9	77.9	6.5	11.2	14.6	-0.0184	-1.4287	1.4471	0.974571	0.936519	2.69063	15.2166
483	-3441.18	3.88222	99.1	96.2	97	99.5	98.1	10.5	76.9	5.1	13.2	14.8	-0.0484	-1.269	1.3174	0.926516	0.845643	2.42097	18.6539
484	-3441.25	3.86552	99.5	96.1	97.6	99.7	97.8	10.7	81.8	6.9	10.7	10.6	0.0816	1.4098	-1.4914	0.890577	0.94744	-2.71755	20.4478
485	-3441.17	3.87461	99.6	96.5	97.5	99.9	97.8	11.8	80.8	4.1	10.8	11.7	0.0288	1.4843	-1.5131	0.961941	0.91466	-2.80461	21.5367
486	-3441.24	3.86771	99.3	95.9	97.5	99.6	97.6	11.2	71.9	8	15	14.6	-0.1395	-1.577	1.7165	0.837472	0.895904	3.0895	21.3198
487	-3441.1	3.8819	98.9	95.6	98	99.6	97.6	10	76.5	9.5	12.3	11.8	-0.1775	-1.6551	1.8325	0.806323	0.901838	3.27556	17.4717
488	-3441.23	3.84727	99.2	96.7	97.8	99.3	98	9.7	84.9	5.5	11.1	11.3	-0.0428	-1.5115	1.5543	0.944929	0.992439	2.86919	21.3498
489	-3441.23	3.87916	99.1	96.1	97.5	99.7	97.5	10.8	75.7	10.6	10.9	12.4	-0.0265	-1.2187	1.2452	0.957424	0.869141	2.30557	17.2859
490	-3441.17	3.84795	98.2	96.4	97.3	98.9	98.1	16.5	60.9	12.4	22.8	9.8	-0.3359	-1.5168	1.8527	0.637366	0.942155	3.1991	21.7449
491	-3441.23	3.86029	99.4	97	97.3	98.9	97.8	17.3	57.2	12.9	21.8	11.6	0.6789	1.2771	-1.956	0.305798	0.948871	-3.21865	25.2532
492	-3441.16	3.88655	99.4	96.5	97.9	99.6	98	11.2	70.6	16.1	9.9	10.6	-0.0288	-1.4427	1.4715	0.960824	0.936679	2.72677	19.33
493	-3441.18	3.84952	99.5	96.4	97.9	99.1	97.8	11.5	84.6	3.7	9	12.1	-0.3373	-1.2788	1.6161	0.582588	0.992796	2.763	22.7453
494	-3441.21	3.85336	99.6	96.6	97.8	98.8	98.1	22.4	49.5	14.3	25.2	11.6	-0.5399	-1.457	1.9968	0.459291	0.970258	3.34758	19.3694
495	-3441.14	3.84637	98.8	96.1	97.7	99.7	98	9	78.2	6.8	10.8	16.7	-0.3103	-1.2241	1.5344	0.59559	0.957032	2.62932	8.11319
496	-3441.24	3.85064	99.2	95.9	98.1	99.1	97.9	10.8	81.1	3.8	12	13.4	-0.396	-1.423	1.819	0.564608	0.967701	3.10032	15.9442
497	-3441.28	3.85386	98.2	96.3	98	98.8	97.7	9.1	85.4	3.4	10.2	12.3	-0.2348	-1.4307	1.6655	0.718081	0.999124	2.92162	27.3069
498	-3441.16	3.86104	98.9	96.7	97.6	99.4	98.3	16.5	65	12.2	15.5	11.1	-0.7166	-1.2338	1.9503	0.265183	0.971273	3.19725	18.958
499	-3441.19	3.88098	100	96.5	97.4	99.1	97.9	10.3	78.4	9.7	10.7	10.2	0.0049	1.5357	-1.5406	0.993695	0.969888	-2.87809	24.7019
500	-3441.22	3.851	99.5	96.3	97.7	98.9	97.7	15.3	75.5	6.7	14.8	10.3	-0.2532	-1.5847	1.8379	0.724512	0.972819	3.22826	18.7863
501	-3441.24	3.8928	98.6	96.6	97.6	99.3	98.4	11.4	76.3	8.7	12.3	11.1	-0.193	-1.3377	1.5307	0.747842	0.906863	2.7018	17.1463
502	-3441.19	3.82958	98.5	96.7	97.9	99.3	98	29.5	52.9	3.6	26.7	11.6	-0.066	-1.9891	2.055	0.935813	0.969457	3.78501	35.4119
503	-3441.29	3.87425	98.4	96	98.3	99.3	97.6	11.6	75.4	7.4	15.8	11.1	-0.0705	-1.5782	1.6487	0.914471	0.91919	3.02114	18.5258
504	-3441.16	3.87189	99.7	96.6	97.2	99	97.7	11.7	81.9	5.3	8.9	12.5	-0.1901	-1.3499	1.54	0.753103	0.935578	2.72125	18.528
505	-3441.27	3.85806	99.3	96.5	97.6	100.3	97.7	16.6	74.6	6.6	13	9.9	-0.0936	-1.6581	1.7517	0.893189	0.949548	3.19374	19.1044
506	-3441.16	3.87322	99.5	96.8	97.4	98.7	97.8	14.7	64.8	13.9	15.5	12.2	-0.3767	-1.4483	1.825	0.587191	0.938585	3.1227	18.8433
507	-3441.22	3.84767	99.5	96.5	98.1	99.3	97.7	11.7	78.1	5	12.5	15.1	-0.2925	-1.3473	1.6398	0.64321	0.9478	2.8346	19.6872
508	-3441.23	3.88978	99.5	96.8	97.6	99.5	98	11.8	75.8	7.1	12.8	10.6	-0.1121	-1.6423	1.7545	0.872163	0.953759	3.18315	18.6488
509	-3441.23	3.85363	98.8	96.2	97.4	99.6	97.6	9.9	84.1	7.8	11.5	9.8	0.1284	1.2587	-1.3871	0.814833	0.953369	-2.48405	14.6872
510	-3441.14	3.89371	99.8	96.6	97.2	98.6	97.9	12.8	71.9	6.6	13.4	14.5	-0.3684	-1.2403	1.6086	0.542	0.903551	2.73136	18.6029
511	-3441.24	3.91301	99.7	96.2	97.9	99.8	98	11.6	77.6	4	12.1	11.3	0.0246	1.4267	-1.4513	0.966146	0.885801	-2.69287	14.5335
512	-3441.26	3.82746	98.7	96.9	97.7	99.2	98.2	34.9	37.7	7	32.8	11.4	-0.7736	-1.7581	2.5318	0.388858	0.981312	4.20471	69.1248
513	-3441.09	3.83861	98.3	97.1	98.1	98.9	98	25.5	35.2	21.7	29.5	10.2	0.3386	1.7784	-2.117	0.680111	1.0329	-3.68547	46.4238
514	-3441.22	3.88314	98.4	96.5	97.5	99.3	97.7	11.1	79.5	3.9	14.8	11	0.0076	1.6822	-1.6898	0.991021	0.945543	-3.15477	24.3292
515	-3441.26	3.86732	99.1	96.4	97.9	99.4	97.9	12	78.4	9.2	11.1	9.9	-0.228	-1.2016	1.4296	0.680976	0.985077	2.48922	18.7797
516	-3441.2	3.81447	98.2	96.9	97.6	98.3	98.2	40.3	28.7	11.1	31	14.4	-0.7032	-1.7983	2.5015	0.437752	0.966126	4.18097	70.0068
517	-3441.15	3.84687	99.3	96.3	97.4	98.7	97.6	15.5	71.9	5.1	17.2	14	-0.2591	-1.5065	1.7656	0.706519	0.944307	3.08999	17.7955
518	-3441.16	3.8753	99.5	96.4	97.8	100.3	97.8	10.4	77.8	4.4	13.7	15.3	0.3138	1.0563	-1.3701	0.541878	0.843591	-2.32632	17.8904
519	-3441.18	3.85126	98.5	96.4	97.9	99.6	98	14.2	75.7	3.6	17.6	11.4	-0.0661	-1.6442	1.7104	0.922659	0.946571	3.14028	21.8233
520	-3441.29	3.85008	100.1	96.1	97.5	98.9	98.1	10.3	88.2	4.3	9.6	10.8	-0.25	-1.3746	1.6246	0.692275	0.981451	2.83498	18.5253
521	-3441.15	3.87878	98.5	96	97.5	99.7	97.9	11.8	76.1	4.9	13.8	14.5	-0.0997	-1.441	1.5407	0.870618	0.880696	2.79431	21.6742
522	-3441.16	3.81895	97.9	97.2	97.5	98.3	98.1	46.2	15.4	13.9	37.9	11.7	-0.4618	-1.9766	2.4383	0.621251	0.989622	4.19766	42.5147
523	-3441.16	3.86194	99.1	96.7	98.5	98.7	98	13.5	77.5	3.2	13.4	12.7	-0.0952	-1.5245	1.6198	0.882415	0.992205	2.94575	21.0819
524	-3441.19	3.8754	99.3	96.4	97.8	98.8	97.2	9.9	84.7	3.3	10.7	11.2	0.0525	1.6187	-1.6713	0.93713	0.964733	-3.07916	18.5793
525	-3441.25	3.88198	99.4	96.1	97.7	99.5	98	10.1	69.5	15.4	12.2	12.3	-0.2999	-1.2477	1.5476	0.612461	0.91028	2.65995	19.7563
526	-3441.27	3.86515	98.5	96.7	97.4	98.9	97.5	12.7	76.1	9.1	11.5	12.4	-0.0107	-1.573	1.5837	0.986442	0.954769	2.95329	18.9966
527	-3441.16	3.87732	98.9	96.4	98	99	98.6	22.4	52.1	10	24.4	11.8	-0.7498	-1.6181	2.3679	0.366704	0.93587	3.92205	21.6084
528	-3441.19	3.85487	100.1	96.4	97.2	99.1	98.4	13.7	74.1	12.4	10.4	12.2	-0.1547	-1.3218	1.4765	0.790432	0.90627	2.62993	18.7857
529	-3441.18	3.88286	98.9	96.7	98.1	99.8	97.7	14.5	77.6	3.2	13.2	11.1	-0.126	-1.544	1.6699	0.849105	0.962249	3.01374	21.6824
530	-3441.25	3.88632	99.6	96.3	98	98.6	98.4	12.8	74.5	6.8	12.5	12.9	-0.1652	-1.6323	1.7974	0.816232	0.920507	3.21982	18.5459
531	-3441.15	3.88303	99.1	95.7	97.9	99	98.2	10.1	77.8	8.3	9.8	13.2	-0.3221	-1.2013	1.5234	0.577071	0.90469	2.60201	17.4627
532	-3441.19	3.85975	99	96.6	97.9	98.4	98.2	15	75	5.8	14	11.9	-0.2431	-1.4436	1.6867	0.711719	0.973301	2.95505	18.758
533	-3441.22	3.87181	98.9	96.4	97.9	99.2	97.9	14.1	70.4	6.9	15.7	13.4	-0.221	-1.3868	1.6078	0.725127	0.927137	2.82448	21.3042
534	-3441.24	3.85694	98.6	96.4	97.5	99.6	97.6	9	81.1	7.6	11.6	13.5	-0.3007	-1.2404	1.5411	0.609815	0.953467	2.64752	17.3968
535	-3441.18	3.87268	99.6	95.9	97.9	99.8	98	9.8	80.4	4.7	12.6	12.4	-0.2823	-1.4791	1.7615	0.679429	0.933853	3.06612	18.8632
536	-3441.25	3.84242	99.2	95.8	97.9	99.2	97.6	12.4	82.4	5	12.2	11	-0.2734	-1.4045	1.6779	0.674118	0.958251	2.91758	18.5941
537	-3441.18	3.87039	98.5	96.4	97.5	98.9	98.1	9.6	83.6	3.5	10.1	12.8	-0.2823	-1.3189	1.6012	0.647355	0.947795	2.77002	18.4807
538	-3441.19	3.88262	99	96.6	97.8	99.9	98	8.6	68.6	18.3	12.5	12	-0.0781	-1.4377	1.5157	0.896969	0.94131	2.76599	19.0469
539	-3441.23	3.87583	99.5	96.6	97.2	99.5	97.8	12.2	68.2	16.3	10.5	14.6	-0.0426	-1.356	1.3985	0.939141	0.915002	2.57792	18.3978
540	-3441.14	3.86441	99.4	96.6	97.5	98.9	97.6	14.1	73	8.5	14.8	12	-0.1434	-1.4403	1.5838	0.818902	0.89774	2.83878	18.5279
541	-3441.1	3.86227	98.8	95.9	97.5	99	97.7	9.4	82.3	4.5	10.7	14.3	-0.689	-1.2418	1.9308	0.286323	0.936903	3.17121	15.4905
542	-3441.2	3.88835	99	96.4	98.2	99.2	98.3	8.8	77.5	10.1	11.3	11.1	-0.2213	-1.4075	1.6288	0.728292	0.985478	2.86326	18.0181
543	-3441.2	3.85498	99.1	96.6	97.6	98.8	98.1	16.4	78.7	4.9	12.7	9	-0.3392	-1.5008	1.84	0.631314	1.00851	3.17347	18.1797
544	-3441.15	3.89226	99.8	97.1	97.8	98.8	97.9	10.9	75.1	11.8	9.6	11	-0.1488	-1.2027	1.3515	0.77979	0.935562	2.40184	17.3523
545	-3441.21	3.85556	99.2	96.2	97.8	98.8	98	11.2	84.2	4.6	10.1	12	-0.1043	-1.3224	1.4268	0.853776	0.926209	2.5776	20.6781
546	-3441.19	3.86782	99.3	96.6	97.7	99.9	97.5	9.9	78.9	7.3	12.6	12.7	0.0505	1.5534	-1.6039	0.936997	0.916203	-2.95505	18.126
547	-3441.1	3.89952	98.8	96.5	98.1	99.9	98.3	11	73.3	11	12.2	10.8	0.1215	1.4045	-1.526	0.840821	0.889096	-2.74874	16.8166
548	-3441.22	3.88526	98.8	96.3	98.2	100	98.5	8.5	78	8.6	12.1	12.4	-0.3432	-1.2933	1.6365	0.580559	0.91268	2.7969	19.0607
549	-3441.22	3.86022	99.9	96.2	96.8	99.1	98	12.9	80.3	5.6	11.1	12.2	-0.1863	-1.3488	1.5351	0.757231	0.874294	2.71489	19.4086
550	-3441.18	3.87684	99.2	96	97.9	99.2	97.9	9.7	79.3	7.8	11.5	11.9	-0.2877	-1.4355	1.7232	0.666119	0.927301	2.99167	24.285
551	-3441.21	3.87169	98.9	95.9	97.9	99.6	97.9	10.7	85.6	4	10.1	10.9	-0.2315	-1.4528	1.6844	0.725071	0.958324	2.95893	18.7511
552	-3441.19	3.85664	99.8	96.3	98	99.2	97.9	11.5	77.9	7.5	11.9	12.2	-0.2456	-1.3753	1.6209	0.696964	0.972695	2.83121	18.6154
553	-3441.19	3.82206	98.2	96.5	97.1	98.8	97.3	25.2	47.7	8.3	28.8	14.2	-0.478	-1.3909	1.8689	0.488467	0.906116	3.14655	22.0242
554	-3441.21	3.8765	99.5	96.3	97.4	98.7	97.8	11.3	77.5	7.8	13.4	10.3	-0.2763	-1.6834	1.9597	0.71801	0.949938	3.43772	18.839
555	-3441.27	3.89493	98.5	96.3	97.6	99.3	98.7	10.4	75.3	8.5	11.8	11.7	-0.207	-1.4357	1.6426	0.747988	0.917321	2.89941	19.7046
556	-3441.2	3.856	99.4	96.2	97.8	98.8	97.8	9.9	84.3	5.7	11.9	11	-0.2926	-1.443	1.7356	0.662862	0.977214	3.01136	16.671
557	-3441.23	3.84396	99.6	96.3	98.1	99.4	98.1	10	82.4	8.3	10.8	10.2	-0.447	-1.3678	1.8148	0.507399	1.01591	3.06438	21.5344
558	-3441.2	3.87683	99.3	96.6	98.2	98.9	97.7	8.6	88.1	3.7	10.1	8.3	-0.1286	-1.6082	1.7369	0.85187	1.04099	3.13653	18.49
559	-3441.16	3.92394	99.2	96.2	98	99.9	98.1	11	75.5	7	12.3	10.5	0.1927	1.4786	-1.6712	0.769439	0.871794	-2.96335	14.8716
560	-3441.22	3.87683	99.1	96	97.3	100	97.6	9.4	75	11.6	11.5	12.6	-0.1585	-1.4667	1.6252	0.80489	0.920101	2.90402	22.6354
561	-3441.22	3.8703	99.4	96.5	97.6	99	97.9	19	59.6	7.4	24.3	10.9	-0.4891	-1.7103	2.1993	0.555259	0.898317	3.74255	18.682
562	-3441.21	3.86445	99.5	96.1	98	99.1	98.1	9.5	87	3.8	9.9	10.8	-0.3898	-1.3631	1.7529	0.555297	1.00461	2.98283	17.5475
563	-3441.28	3.87326	99.7	95.9	97.3	99.7	97.9	10	80	4.5	12.3	14.4	-0.1753	-1.3426	1.5178	0.769055	0.853482	2.6911	18.7894
564	-3441.21	3.88319	99.9	96.8	98.2	99.5	98.2	9.8	78.8	10.1	10.5	9.8	0.0115	1.4356	-1.4471	0.984043	0.951681	-2.69702	18.3738
565	-3441.22	3.90391	98.9	96.2	97.5	99.9	98.3	13.1	75	4.7	14.1	12.5	-0.1286	-1.3773	1.5059	0.829224	0.857184	2.7055	18.251
566	-3441.23	3.87802	99.3	96.5	97.6	99.1	97.8	10.1	75.2	11.5	10.7	11.7	-0.3088	-1.318	1.6267	0.620391	0.946232	2.80005	18.5758
567	-3441.15	3.85031	99.2	96.4	97.8	99.5	97.8	13.9	76.4	3.6	16.6	12.3	0.1201	1.6501	-1.7702	0.8643	0.956742	-3.20577	17.238
568	-3441.23	3.88377	98.7	95.7	97.8	99.6	97.8	9	76.7	10.8	11.1	10.8	-0.1673	-1.5176	1.6849	0.801414	0.925075	3.00847	17.2798
569	-3441.13	3.87391	98.2	96.6	98	99.5	98.3	10.5	80.5	7.3	10.6	10.1	-0.2133	-1.6412	1.8544	0.769978	0.957222	3.28857	18.2709
570	-3441.22	3.86652	99.1	95.8	97.8	99.7	98	9.9	84.1	4.7	11.8	10.9	-0.043	-1.5272	1.5702	0.94524	0.922553	2.89861	18.7665
571	-3441.17	3.87614	99.6	96.5	97.2	98.9	98.2	16.3	70.1	9.5	13	11.2	-0.2375	-1.3907	1.6282	0.708266	0.934545	2.85052	18.5255
572	-3441.24	3.85578	98.9	95.9	97.7	99.9	97.9	14.4	76.3	6.3	13.9	10.1	-0.2511	-1.5197	1.7708	0.716415	0.945737	3.10523	18.5027
573	-3441.25	3.8784	99.7	96.2	97.6	100.1	98.1	9.6	82.1	3.7	11.7	13.1	-0.0519	-1.393	1.445	0.928109	0.912277	2.65646	19.946
574	-3441.22	3.86142	99.4	96	97.6	99.7	97.6	13.5	78.3	5.7	11.1	12.5	-0.1207	-1.4579	1.5787	0.847029	0.9064	2.84766	18.3828
575	-3441.21	3.85057	99.1	96.5	98	99.1	98	17.3	70.7	3.6	16	13.8	-0.0311	-1.7098	1.7409	0.96428	0.979346	3.2288	31.8747
576	-3441.17	3.86981	99.2	96.2	98.2	99.2	98.4	10	81.3	8.4	10.9	9.6	-0.2257	-1.4593	1.685	0.732071	0.973543	2.96441	21.1871
577	-3441.19	3.85853	99.8	96.3	97.7	99.2	97.5	10.5	85.3	3.8	9.5	12.3	-0.0877	-1.5887	1.6764	0.895389	0.999829	3.05801	22.1073
578	-3441.2	3.8954	99	97	97	99.5	98	13.7	24.2	47.8	15.6	15.8	-0.168	-1.4229	1.5909	0.788847	0.851856	2.83272	29.7302
579	-3441.15	3.88554	99.5	96.7	97.8	99.3	98	10.5	77.8	8.9	11.8	11	-0.0406	-1.5137	1.5544	0.947714	0.928936	2.87114	16.4595
580	-3441.25	3.85892	99.8	96.5	98.4	98.6	98	13.9	76.2	4.4	14.6	11.6	0.2541	1.5339	-1.788	0.715765	0.961976	-3.13492	22.5944
581	-3441.12	3.87505	99.8	96.6	98	99.4	97.9	10.6	79.8	9.5	9.4	10.9	-0.135	-1.5032	1.6382	0.835183	0.978669	2.94708	21.4216
582	-3441.21	3.8744	99.5	96.3	97.8	100.1	97.5	8.7	84.2	6.5	11.7	8.3	0.139	1.7063	-1.8452	0.849385	0.993168	-3.33031	20.6002
583	-3441.21	3.85413	99	96.2	97.5	99.6	98.1	11.4	76.2	7.7	12.1	13.8	-0.3785	-1.135	1.5134	0.499861	0.893947	2.55251	19.0562
584	-3441.19	3.85377	99.1	96.8	98	99.1	98	12.5	78.1	8.7	13.7	9.7	0.2377	1.4469	-1.6846	0.717788	0.921314	-2.95493	18.7238
585	-3441.24	3.88695	99.3	96.2	97.2	99.7	98.1	11.2	78.4	6.1	12.6	10.6	-0.0952	-1.6048	1.7	0.888016	0.948052	3.0957	17.5134
586	-3441.13	3.86499	98.8	96.5	97.5	99.6	98.1	8.6	77.9	10.2	12.3	10.4	-0.0244	-1.6945	1.719	0.971565	0.982037	3.19378	24.1175
587	-3441.17	3.87085	99.5	96.7	97.2	99.5	97.7	12.5	78.8	5.6	12.9	10.8	0.1302	1.5373	-1.6675	0.843837	0.931669	-3.0058	21.6586
588	-3441.18	3.87411	99.5	97	97.5	99.4	97.5	10.6	76.3	12	10.3	11.1	-0.0457	-1.428	1.4737	0.93803	0.933221	2.71577	18.6493
589	-3441.2	3.86377	99.3	96.5	97.7	99.2	97.2	11.5	76.3	10.1	13	10.5	-0.0218	-1.4069	1.4287	0.969499	0.920902	2.65316	18.5005
590	-3441.25	3.85359	98.9	96.8	97.5	99.2	97.5	9	82.3	10.8	11.6	9.8	-0.0266	-1.2691	1.2957	0.958884	0.980714	2.39997	17.6655
591	-3441.18	3.8792	98.8	96.5	97.5	99.4	98	10.8	74.1	10.6	12	12.1	-0.1397	-1.3714	1.5111	0.815102	0.91805	2.70632	20.8953
592	-3441.21	3.87849	99	96.7	97.9	99.4	98.3	9.5	86.5	3.7	10	8.8	-0.1381	-1.5844	1.7225	0.839672	1.03025	3.10193	16.174
593	-3441.22	3.90635	99.7	96.5	97.6	99.4	98.1	11.8	70.8	12.8	10.3	11.9	-0.0977	-1.3478	1.4455	0.864822	0.885966	2.61808	15.1603
594	-3441.23	3.87741	98.5	96.2	97.8	100.2	97.8	10.6	78.3	9	11.6	10.5	-0.0467	-1.5722	1.6188	0.942356	0.910601	2.98638	18.7063
595	-3441.22	3.86614	99.1	96.6	97.4	99.9	97.6	13.9	65.6	18.4	13.4	10	0.5328	1.2052	-1.7379	0.386884	0.94065	-2.88564	26.0255
596	-3441.26	3.87243	99.3	96.3	97.5	99.7	98.2	9.4	80.4	8.6	11.3	11	-0.2324	-1.443	1.6754	0.722623	0.98022	2.94165	18.0582
597	-3441.19	3.86853	99.6	96.5	97.9	99.5	97.8	11.1	84.8	4	11.5	9.7	0.1763	1.4097	-1.5861	0.777656	0.946207	-2.81729	21.5207
598	-3441.17	3.89216	99.1	96.3	97.9	99.3	98.1	9.2	77.1	5.6	11.6	15.7	-0.4294	-1.2877	1.717	0.49988	0.890948	2.89587	18.4899
599	-3441.19	3.85175	98.9	96.5	97.6	98.4	98.5	19	64	15.5	12	11.8	-0.5405	-1.1409	1.6814	0.357098	0.958854	2.78192	26.5799
600	-3441.22	3.83559	98.4	97	97	99	98	30	12.2	32.4	36.8	11.8	-0.9998	-1.3778	2.3776	0.158966	0.950755	3.86896	38.0455
Average	-3441.2	3.86802	99.116	96.4115	97.634	99.3283	97.9738	13.3877	72.4942	9.06417	14.0215	11.7787	-0.206148	-0.990848	1.197	0.726999	0.939499	2.08392	21.0845
Standard-Deviation	0.0417315	0.0208882	0.414138	0.33194	0.327379	0.404966	0.289768	6.40406	12.6018	5.8231	5.69757	1.53101	0.247349	1.05805	1.21291	0.193525	0.0423334	2.14493	7.26227

## Sheet: 195K-Data
Structure-Nr.	FSPE / Ha	Mull (Fe)	α dxy / %	α dxz / %	α dyz / %	α dx²-y² / %	α dz² / %	ß dxy / %	ß dxz / %	ß dyz / %	ß dx²-y² / %	ß dz² / %	Vxx / a.u.-3	Vyy / a.u.-3	Vzz / a.u.-3	η	δ / mm s-1	ΔEQ / mm s-1	tRun / core∙h
1	-3441.17	3.81044	97.6	96.9	97.6	98.9	98.2	50.7	18.6	7.6	38.2	10.6	-1.2727	-1.315	2.5877	0.016352	0.964519	4.19335	24.9776
2	-3441.23	3.86788	99.6	95.9	97.8	99.1	97.8	23	56.3	7.7	20.7	14	-0.517	-1.4756	1.9926	0.48105	0.865111	3.35115	28.2034
3	-3441.27	3.8512	99	96.2	97.9	98.8	98.2	21.6	67.3	4.4	18.1	10.4	-0.0986	-1.7226	1.8212	0.891684	0.964308	3.31934	18.6205
4	-3441.16	3.85391	99	95.5	97	99.6	97.2	9.5	81.3	4.9	11.5	15.6	-0.2639	-1.3137	1.5776	0.665451	0.897798	2.73853	18.4851
5	-3441.12	3.86099	99.1	96.6	98	99	98.3	13.3	74.4	6.3	10.3	16.4	-0.2105	-1.4552	1.6656	0.747278	0.927659	2.93956	18.6165
6	-3441.17	3.85707	99.9	96.2	97.2	99.5	97.6	11.2	75.1	13	10.2	13.8	-0.3674	-1.154	1.5213	0.517061	0.895035	2.57275	18.5008
7	-3441.21	3.90672	99.4	96.4	98	99.8	98.4	13.8	72.4	8.3	12	10.5	0.0214	1.4919	-1.5133	0.971751	0.90099	-2.81175	16.9388
8	-3441.23	3.8705	98.7	96.3	97.5	99.5	98	12.9	80	3.9	14.4	9.1	0.0792	1.5971	-1.6763	0.905461	0.969169	-3.06513	18.4128
9	-3441.19	3.88021	99	96.7	97.5	99.5	98.1	9.7	63.7	16.5	11.5	18.4	-0.3718	-1.3772	1.749	0.57486	0.897807	2.98622	18.4456
10	-3441.16	3.85416	99.2	97.1	97.9	99.2	97.8	9.4	80.1	4	14.7	12.1	0.0213	1.4567	-1.478	0.971219	0.981501	-2.74578	28.1115
11	-3441.19	3.82746	98.9	97	97.5	98.7	98	26.4	50.6	4.1	32.3	10	-0.6604	-1.8177	2.4781	0.466992	1.02603	4.15902	58.1354
12	-3441.22	3.86382	98.9	96.8	97.8	99.2	98.6	11.6	77	7.2	13	11.9	-0.4178	-1.0499	1.4678	0.430666	0.977377	2.45086	20.8586
13	-3441.27	3.86377	99.8	96.4	97.9	99.3	97.2	11.4	78.5	6.5	10.6	14	-0.0998	-1.5007	1.6005	0.875268	0.994884	2.90594	18.8788
14	-3441.15	3.86422	99.4	96.7	97.6	99.7	97.5	12.5	74	7.9	11.1	14.6	0.0593	1.3356	-1.3949	0.914927	0.876008	-2.55636	21.5536
15	-3441.19	3.85949	99.8	96.6	97.6	99.2	97.4	12.9	75.1	3.7	15.4	14.1	-0.0069	-1.6081	1.6151	0.991415	0.935135	3.01556	22.4462
16	-3441.2	3.82682	98.4	97	97.4	98.5	98.3	40.3	31.1	3.4	38.5	10.5	-0.7698	-1.7912	2.5611	0.398813	1.02221	4.25866	31.8102
17	-3441.17	3.8713	99.3	96.5	97.7	99.6	97.9	10.1	74.7	13.5	10.6	10.2	-0.1242	-1.3267	1.4509	0.828785	0.965192	2.60645	18.5025
18	-3441.18	3.88795	99.2	96.4	97.9	99	97.7	10.6	74.7	9	12.2	12.6	0.1997	1.1884	-1.3881	0.712302	0.872886	-2.43205	17.681
19	-3441.22	3.86212	99	96.4	97.4	98.8	98.7	11.6	84.2	5.7	8.6	11.2	-0.2688	-1.4322	1.701	0.683974	0.967952	2.96354	18.2716
20	-3441.16	3.86402	99.5	96.3	97.6	99.7	98	12.8	73	11.5	11.9	11.1	-0.1523	-1.4207	1.573	0.8063	0.92783	2.81161	18.3691
21	-3441.24	3.85677	99.8	96.2	97.5	100	97.6	10.3	85.2	4.4	10.9	11	-0.1167	-1.3694	1.4862	0.842884	0.982176	2.67826	19.2473
22	-3441.2	3.86874	98.9	96.3	97.2	99.5	97.8	16.2	75.5	5.4	13	11.3	-0.2681	-1.534	1.8022	0.702434	0.953517	3.15131	27.1498
23	-3441.23	3.85344	99.1	96.6	97.9	99.2	98.3	10.8	77	9.8	12.7	11.7	-0.4499	-1.332	1.7819	0.495041	0.96045	3.00318	24.369
24	-3441.05	3.88923	99.3	96.3	97.5	99.3	98	10.7	74.7	9.1	11.8	11.9	-0.1973	-1.5607	1.758	0.775535	0.878786	3.12132	17.594
25	-3441.17	3.88711	99.1	95.6	97.6	99.9	98.2	10.4	76.8	4.5	14.4	12.7	0.0037	1.1687	-1.1724	0.993713	0.865513	-2.1903	18.2438
26	-3441.21	3.84819	98.7	96.4	97.2	99.4	97.6	10.3	73.2	6.8	17.1	15.5	-0.4779	-1.3773	1.8553	0.48478	0.956233	3.1219	21.4189
27	-3441.1	3.84588	98.8	96.7	97.9	98.8	97.8	10.5	78	9.1	10.5	14.8	-0.1011	-1.1652	1.2664	0.840262	0.972946	2.28079	19.0219
28	-3441.23	3.87954	98.8	96.2	97.1	99.9	97.8	11.1	74.4	10.7	12.9	12.3	0.0618	1.2215	-1.2833	0.903661	0.867273	-2.34552	18.4723
29	-3441.09	3.86612	99.2	95.8	97.5	99.2	97.8	16.4	63.2	9.3	18.4	12.9	-0.3557	-1.712	2.0678	0.655918	0.935272	3.58295	21.4924
30	-3441.21	3.85473	98.6	95.7	97.7	99.8	98.2	8.6	86.7	4	10.3	11.2	-0.3399	-1.3629	1.7029	0.600747	1.00943	2.92069	26.8134
31	-3441.21	3.86003	99.3	96.5	98.2	99.2	97.8	13.1	74.1	4.5	15.7	13.2	-0.1257	-1.5941	1.7198	0.853819	0.972632	3.10704	17.4726
32	-3441.26	3.87152	99	96.6	97.5	99.1	98.2	16.5	64.3	10.3	17	12	-0.2691	-1.3973	1.6663	0.677032	0.935359	2.89918	21.7652
33	-3441.17	3.88508	98.7	96.3	97.8	99.1	97.7	9.9	81	4	11.6	11.8	0.0352	1.7217	-1.757	0.959875	0.950144	-3.25509	30.2844
34	-3441.19	3.90223	99.5	96.8	97.6	99.6	97.8	14.5	64.8	15.9	13	9.9	0.347	1.1993	-1.5463	0.551206	0.880456	-2.62956	18.5158
35	-3441.15	3.86306	99.1	95.9	97.5	99.8	98.5	16.8	64.9	5.5	22.8	11.2	-0.3285	-1.7017	2.0302	0.676363	0.93867	3.53176	24.3992
36	-3441.15	3.85482	98.8	97	97.8	100.1	97.9	19.2	64.8	4.6	22.2	10.6	-0.4057	-1.5763	1.9821	0.590601	0.992568	3.3934	17.5289
37	-3441.17	3.86342	99.7	96.6	97.6	99.6	98.5	9.5	78.2	13.2	9.4	10.4	-0.3265	-1.3262	1.6527	0.60493	1.02818	2.83674	19.0277
38	-3441.25	3.86698	98.8	96.6	97.3	98.8	97.9	16.9	70.4	5	17.4	10.7	-0.1614	-1.6122	1.7736	0.817966	0.965444	3.17848	19.2158
39	-3441.16	3.87092	99.4	96.5	97.5	99.1	98.3	11.6	75.7	10.6	10.3	11.7	-0.1037	-1.2841	1.3878	0.850604	0.898164	2.5054	18.7879
40	-3441.27	3.86215	98.8	96.7	97.7	99.6	97.7	13.5	76.8	9	11.7	9.7	-0.1966	-1.555	1.7516	0.77554	0.969507	3.10989	21.4498
41	-3441.19	3.83236	99.3	96.5	97.8	98.7	98.1	27.5	51.1	11.8	22.5	10.8	-0.7102	-1.3132	2.0234	0.298023	0.934136	3.32701	16.929
42	-3440.97	3.85596	99.2	96	97.4	99.9	97.6	10.6	69.4	19.7	11	11.4	-0.1055	-1.1264	1.2318	0.82876	0.925169	2.21284	18.7355
43	-3441.22	3.86868	99.6	96.2	97.6	99.4	98.2	10.8	77.3	7.9	12.2	12	-0.2847	-1.3022	1.5869	0.641155	0.931242	2.74206	18.3509
44	-3441.19	3.84087	98.4	95.8	97.1	99	97.5	14	76.7	5.9	14.7	13.2	-0.4257	-1.3101	1.7358	0.509539	0.874217	2.93192	19.8036
45	-3441.15	3.89409	99.5	96.7	97.9	99.3	98	10.3	76.6	8.7	10.7	11.8	-0.1813	-1.361	1.5423	0.76484	0.911501	2.73211	14.5318
46	-3441.15	3.90369	99.1	96.6	97.6	99.6	98.3	17.7	56.4	7.8	23	12.3	-0.6173	-1.505	2.1223	0.418275	0.905384	3.53793	18.0423
47	-3441.02	3.85397	99.2	96.2	97.5	99.2	97.4	13.1	78.2	9.7	11.6	9.5	0.0685	1.6817	-1.7502	0.92171	0.927057	-3.21277	16.7478
48	-3441.14	3.86877	99.4	96.6	98.2	98.8	97.6	11.7	79.6	7.9	10.2	9	0.1172	1.475	-1.5921	0.852831	0.963092	-2.87578	16.6284
49	-3441.15	3.87459	99.4	96.2	97.7	99.4	97.7	11.4	84.8	3.2	10.9	9.3	-0.0181	-1.5681	1.5862	0.977216	1.01075	2.95126	18.5373
50	-3441.18	3.86611	98.6	96.5	97.9	99.5	98	10.2	84.6	3.3	10.9	11.2	-0.2654	-1.3905	1.6559	0.679459	0.984792	2.88239	24.3078
51	-3441.19	3.85733	99.2	96.9	97.8	99.4	98	13.9	77.9	6.9	12	10.5	-0.1441	-1.4071	1.5512	0.814252	0.95881	2.77757	18.6726
52	-3441.19	3.86251	98.9	96.3	97.9	99.3	98.1	9.3	82.5	5.8	12.7	12.1	-0.1503	-1.3101	1.4604	0.794149	0.918181	2.60343	18.0333
53	-3441.12	3.87725	99.1	97	97.9	99.1	97.9	11.3	67.1	16.1	13.5	11.3	-0.1296	-1.6348	1.7644	0.853043	0.966181	3.1871	18.6539
54	-3441.16	3.88704	99.3	96.3	97.3	98.9	98.3	10.3	77.1	10.7	10.9	10.6	-0.0449	-1.2422	1.2871	0.930185	0.908585	2.36749	17.9765
55	-3441.15	3.86304	99.2	96.3	97.7	99.3	97.2	12.5	56.8	30	11.1	10.2	0.0345	1.5164	-1.5508	0.955553	0.930471	-2.87014	24.4147
56	-3441.15	3.85322	98.8	96.5	98	99.4	97.6	10.2	71.1	13.3	13.6	12	-0.0401	-1.6579	1.698	0.952741	0.950558	3.14039	18.359
57	-3441.23	3.83324	98.4	96.4	98	99.4	98.5	32.3	43.3	4.4	31.8	11.4	-0.3546	-1.8161	2.1707	0.673318	0.9906	3.77388	42.1882
58	-3441.11	3.88925	100.2	96.6	97.8	98.8	97.8	11.6	84.6	3.7	9.4	9.2	0.184	1.3892	-1.5733	0.766041	0.94123	-2.78761	15.4989
59	-3441.13	3.87657	99.3	96	97.7	99.7	97.8	10.6	71.4	13.1	13.7	11.1	-0.0359	-1.6375	1.6734	0.957036	0.899711	3.09809	17.6393
60	-3441.13	3.8573	99.3	96.3	97.6	99.5	97.7	10.1	80.5	5.1	10.9	15.3	-0.1443	-1.2201	1.3644	0.788535	0.960556	2.42925	16.7454
61	-3441.16	3.86185	98.5	95.9	97.8	99.5	98.2	8.6	81.3	8.1	10.5	12.4	-0.5587	-1.1439	1.7027	0.343704	0.952044	2.81288	21.5429
62	-3441.09	3.79796	98.7	95.9	97	99.2	97.7	36.7	30.1	11.8	36.9	11.2	-1.0334	-1.5448	2.5782	0.198367	0.934913	4.20513	39.6694
63	-3441.15	3.82429	98.8	96.5	97.7	98.8	97.9	39.2	36.1	4.3	34	11.9	-0.846	-1.702	2.548	0.335952	0.967225	4.20582	17.1849
64	-3441.15	3.84427	99.4	96.2	97.7	99.3	98	11	78.9	8.1	14	10.3	-0.1596	-1.4409	1.6004	0.800585	0.940711	2.85705	18.5042
65	-3441.25	3.86777	99	96.2	97.6	99.4	97.4	10.6	81.8	5.3	12.6	11	0.128	1.3032	-1.4312	0.821188	0.887437	-2.56656	18.4061
66	-3441.24	3.85467	99.4	96.3	97.8	98.8	98	11.8	79.4	8.8	11.6	11.6	-0.3878	-1.1367	1.5245	0.491242	0.897782	2.56774	18.4257
67	-3441.14	3.89806	99.5	96.7	97.5	99.3	98	11.4	73.4	10.2	11.5	12.7	0.0402	1.2524	-1.2926	0.937824	0.915598	-2.38193	18.5641
68	-3441.17	3.86076	98.8	96.5	97.3	99.4	97.9	14.1	72.2	4.9	15.3	14.9	-0.2597	-1.5761	1.8358	0.717041	0.923382	3.21963	26.4587
69	-3441.17	3.88143	99.6	96.4	97.8	99.7	97.9	11.6	74.2	5.4	10.6	18.3	-0.2005	-1.3864	1.5868	0.747323	0.908752	2.80054	18.424
70	-3441.12	3.85725	99.3	96.4	98.1	99.8	98.1	10.5	78.7	10.2	11.7	11.2	-0.1195	-1.3459	1.4654	0.836922	0.928773	2.63731	17.556
71	-3441.23	3.85824	99.4	96.5	97.8	98.5	98.2	9	86.5	5.5	9.3	11.5	-0.5408	-1.4644	2.0052	0.460632	0.978283	3.36225	21.6318
72	-3441.15	3.85914	99.3	96.3	97.3	99.8	97.7	17.2	68.5	6.9	16.6	12.4	-0.3678	-1.5365	1.9043	0.613717	0.971025	3.27385	17.3755
73	-3441.21	3.88528	98.9	96.9	98.2	99.4	98.2	10	75.5	12.4	11.2	10.3	-0.1615	-1.317	1.4785	0.781599	0.937734	2.62845	17.4852
74	-3441.16	3.87908	98.6	96.2	97.3	99.6	97.8	10.7	75.9	10.1	12.9	10.9	0.037	1.5123	-1.5493	0.952198	0.901253	-2.86496	19.5024
75	-3441.19	3.91057	99	96.4	98	98.8	98	11.6	75	5.7	12.5	12.1	-0.2047	-1.5023	1.707	0.760218	0.912833	3.02079	18.5201
76	-3441.15	3.85672	98.9	96.3	98	99.1	98.4	8.8	86.1	3.8	11.6	11.6	-0.332	-1.2471	1.5791	0.579513	0.97333	2.6983	20.7606
77	-3441.14	3.87581	99.8	96	97.6	99.4	98.4	15.1	77.4	4.6	12.1	11.5	0.0063	1.5893	-1.5956	0.992136	0.919062	-2.9797	21.6135
78	-3441.21	3.87754	98.9	96.3	97.6	99.2	98.2	9.7	76.1	8.9	11.7	13.4	-0.2295	-1.2857	1.5153	0.697026	0.920779	2.64682	15.6647
79	-3441.12	3.79027	98.6	97	97.5	98.1	98	47.6	6.9	12.6	47.9	12.6	-1.2031	-1.4865	2.6896	0.105388	0.964898	4.3664	64.5696
80	-3441.18	3.84356	99.6	96.8	97	98.7	98.1	11.7	57.4	27.2	14	12.1	-0.0693	-1.5403	1.6096	0.913833	0.982527	2.94904	42.4143
81	-3441.19	3.88217	99.2	96.2	97.4	99.1	97.6	10.8	78.5	4.5	12.6	12	-0.0842	-1.7382	1.8224	0.907574	0.896871	3.33397	18.3984
82	-3441.17	3.87195	100.3	96	98.1	99.3	97.8	13.3	75.9	8.1	9.7	13.4	0.0887	1.3373	-1.426	0.875644	0.902898	-2.58929	21.8338
83	-3441.22	3.88814	98.9	95.9	97.2	99	97.7	13.8	71.8	9.1	11.4	12.3	-0.0632	-1.5515	1.6148	0.921678	0.824097	2.96402	16.7115
84	-3441.17	3.85514	99.2	97.1	97.2	99.1	98.3	14.4	61.5	24.7	10.1	9.5	-0.1309	-1.2054	1.3364	0.804067	0.949825	2.38747	18.033
85	-3441.21	3.88747	99.4	96.5	98.5	99.5	97.3	15.8	62.6	12.5	16.2	11.6	-0.0755	-1.7858	1.8613	0.918894	0.885708	3.41425	18.7236
86	-3441.11	3.9043	99	95.9	97.8	99.5	97.6	11.6	66.2	13.6	13	14.8	0.2647	1.4479	-1.7126	0.690865	0.794565	-2.98777	17.6726
87	-3441.13	3.85494	98.8	96.3	96.9	99.4	98.2	12.2	79	10.3	10.4	11	-0.215	-1.2756	1.4906	0.711551	0.996194	2.61133	18.3402
88	-3441.15	3.86856	98.9	96.6	98	99.6	97.9	9.2	78.8	8.7	12.5	11.4	-0.1319	-1.2679	1.3998	0.811577	0.970934	2.505	18.1094
89	-3441.16	3.79151	98.4	96.7	97.6	98.9	98.3	43.8	23.5	5.5	41.3	12.2	-0.8701	-1.5156	2.3856	0.270562	0.997635	3.91269	33.3576
90	-3441.14	3.84844	98.8	96.2	97.4	99.3	98.1	11	77.8	6.9	11	15.1	-0.302	-1.0082	1.3102	0.539012	0.926164	2.22347	18.6856
91	-3441.24	3.87671	99.2	96.2	97.6	99.5	98.2	10.4	75.5	10.2	11.9	13	-0.1405	-1.3749	1.5154	0.814596	0.88875	2.71363	15.5168
92	-3441.24	3.86852	99.4	96.3	97.4	99.6	98.1	10	84.6	5.3	10.9	9.7	-0.1243	-1.4793	1.6036	0.844927	0.964305	2.89128	19.835
93	-3441.2	3.86295	99.6	96.1	97.5	99.3	97.9	10.2	75.8	12.6	10.4	13.8	-0.3553	-1.392	1.7474	0.593288	0.893601	2.99306	33.5548
94	-3441.12	3.8495	99	96.5	97.6	98.8	98.1	10.5	80.9	10.6	10.5	9.6	0.0269	1.1034	-1.1304	0.952359	0.962487	-2.09032	17.7945
95	-3441.18	3.87668	98.7	96.1	97.4	99.4	97.6	10.1	81.5	4.5	12.5	11.4	0.028	1.573	-1.601	0.965046	0.903743	-2.96982	24.7717
96	-3441.15	3.89914	98.7	96	97.7	99.9	97.7	9.7	81.1	3.6	14	10.8	0.3522	1.5054	-1.8576	0.620823	0.817377	-3.19765	18.5533
97	-3441.06	3.88761	98.9	95.8	98	99	97.8	9.6	72.4	13.4	11.9	11.1	-0.1018	-1.3778	1.4795	0.862424	0.907587	2.67829	18.8259
98	-3441.14	3.86789	98.7	97	97.2	99.8	97.9	12.1	79.9	6.6	11.5	9.6	-0.0148	-1.4244	1.4393	0.979392	0.97174	2.67928	16.3537
99	-3441.2	3.88592	98.8	95.6	98	99.7	98.2	9.9	80.4	4	14	12.4	0.0314	1.7242	-1.7555	0.964283	0.855594	-3.2559	20.951
100	-3441.22	3.86433	99.4	96.2	97.7	99.2	98.5	10.1	81	4.2	9.9	14.8	-0.2957	-1.4599	1.7556	0.6631	0.922485	3.04621	18.8165
101	-3441.14	3.8578	99.3	95.9	97.7	99.9	97.6	9.1	82	5.1	13.7	12.3	0.1149	1.1189	-1.2338	0.813708	0.860294	-2.20897	17.5569
102	-3441.23	3.87087	98.8	96.5	97.7	99.3	98.8	9.7	78.2	10	11.2	10.2	-0.1557	-1.2009	1.3566	0.770413	0.948766	2.40597	18.4568
103	-3441.22	3.89526	100.1	96.8	97.5	99.4	98	11.8	76	9.4	11.5	9.3	0.3375	1.4575	-1.795	0.623983	0.878818	-3.09163	18.3428
104	-3441.12	3.88892	99.1	96.8	98	99.6	97.6	13.2	77.7	4.3	10.7	13.3	-0.0489	-1.8082	1.8571	0.947329	0.927081	3.43003	18.4896
105	-3441.11	3.88059	98.3	95.4	98	99.5	97.4	9.7	79.6	4.8	12.4	13.6	-0.4332	-1.3751	1.8084	0.52085	0.910577	3.06	20.0055
106	-3441.23	3.86589	99.9	96.8	97.6	99	97.9	13.5	72.7	10.1	13	11.7	-0.3468	-1.3361	1.6829	0.587847	0.949594	2.87981	18.8768
107	-3441.06	3.92025	99.5	96.9	98	99	97.8	11.3	66.9	13.5	11.3	13.4	0.0288	1.3949	-1.4236	0.959572	0.862615	-2.63732	16.6616
108	-3441.1	3.89727	98.9	96.5	98.6	99.4	98.5	10.3	78.9	7.8	11.1	9.3	-0.0903	-1.5934	1.6836	0.892759	0.957001	3.06935	17.7665
109	-3441.09	3.87742	99.3	97.7	96.7	99.5	98	13	7.3	73.8	15.7	9.5	-0.0276	-1.3304	1.358	0.959358	0.964885	2.51559	32.1563
110	-3441.12	3.86698	99.6	96.2	97.4	99.6	98.4	12.2	76.1	8.7	12.7	11.7	0.0387	1.5437	-1.5823	0.951146	0.938087	-2.92524	20.7937
111	-3441.17	3.87053	98.7	96.3	98.1	99.6	97.5	10.3	73.3	6.2	15.6	15.9	-0.0296	-1.7782	1.8078	0.967278	0.905167	3.35535	17.8617
112	-3441.24	3.88738	99.4	95.9	97.8	99.6	98.7	11.8	71.8	11.1	10.2	12.8	-0.3681	-1.4014	1.7694	0.583977	0.935043	3.02588	18.3928
113	-3441.23	3.84758	99.1	96.6	97.3	99.9	98.1	11	82.5	5.3	10.8	12.7	-0.0274	-1.309	1.3364	0.95899	0.959348	2.4754	25.3565
114	-3441.07	3.85366	99	96.1	97.3	99.5	97.9	13.8	77.4	4.6	12.4	13.9	-0.3573	-1.3223	1.6796	0.574541	0.916743	2.86757	22.8629
115	-3441.15	3.78346	98.5	96.6	97.3	98.8	98.2	46.9	22.1	4.6	41.7	12.6	-1.1501	-1.4558	2.6058	0.117319	0.977562	4.23231	34.0456
116	-3441.13	3.86514	99.5	96	97.3	100.2	98.4	12.9	76.8	8	11.9	11.5	-0.0936	-1.4334	1.527	0.877352	0.919278	2.77382	16.9739
117	-3441.18	3.89873	99.4	96.8	97.3	99.3	98.2	10.7	80.2	5.8	10.3	11.5	-0.1567	-1.4033	1.56	0.799135	0.957013	2.78396	20.9809
118	-3441.19	3.85501	98.9	96.5	97.5	98.8	97.7	12.5	77.5	4.3	14.2	12.9	0.0019	1.5136	-1.5155	0.997511	0.928898	-2.83387	19.8487
119	-3441.13	3.83241	99.4	96.4	97.9	98.9	97.8	13.2	78.3	7.8	13.6	10.5	-0.3423	-1.385	1.7272	0.603694	0.997045	2.964	21.8064
120	-3441.13	3.87084	99.4	96	97.1	99.8	97.9	9.4	72.9	14.6	11.2	11.4	-0.1658	-1.5496	1.7154	0.806687	0.91979	3.06634	18.8458
121	-3441.16	3.91281	98.8	97.2	97.4	100	98.1	10.5	71.8	11	11.7	12	0.0651	1.1994	-1.2645	0.897021	0.905713	-2.30757	15.5443
122	-3441.08	3.87432	98.8	96.4	98	99.5	97.8	11.7	78.3	6.5	13	10.1	0.1775	1.2843	-1.4619	0.757105	0.924801	-2.58531	17.2853
123	-3441.27	3.88133	99.4	97.2	97.8	99.6	98.1	12.2	69.1	17.4	11	10.5	-0.0615	-1.4982	1.5597	0.921117	0.96635	2.86265	20.7816
124	-3441.2	3.87022	98.7	96.2	97.3	99.3	97.8	12.1	75	9.3	11.9	12.9	-0.1558	-1.2664	1.4223	0.780858	0.897483	2.52813	17.2143
125	-3441.1	3.84023	98.4	96.2	97.3	99	98	21.8	59.9	10.6	19.5	11.8	0.4324	1.4251	-1.8576	0.534414	0.915019	-3.15009	22.3575
126	-3441.23	3.85407	99.3	96.8	98.1	99.8	97.9	9.1	70.9	18.9	10.3	11.5	-0.3259	-1.239	1.5649	0.583502	1.01026	2.67579	27.1821
127	-3441.17	3.86726	99.6	96.1	98	99.5	98	10.7	78.1	6	11.9	12.7	-0.2326	-1.4809	1.7135	0.728477	0.997987	3.01222	19.9085
128	-3441.23	3.86203	99.6	96.6	98.2	99.2	97.8	11.3	84.2	4.2	10.7	11.3	-0.0687	-1.658	1.7267	0.920421	1.02571	3.1685	21.278
129	-3441.07	3.86815	99	96.1	97.3	100.1	98.2	14.2	75.4	4.7	15.1	11.5	-0.0676	-1.4726	1.5402	0.912251	0.902218	2.82086	26.4218
130	-3441.2	3.85191	99.5	96.7	98.4	98.8	98.1	16.6	70.6	6.6	17.2	10.3	-0.3049	-1.5967	1.9016	0.679289	1.0378	3.30998	22.5149
131	-3441.21	3.86611	99.4	96.4	97.9	98.9	98	11	76.5	12	10.1	11.5	-0.3228	-1.4935	1.8163	0.644574	0.97174	3.14035	18.3757
132	-3441.23	3.86789	98.9	95.9	97	99.5	97.6	9.7	79.6	8.9	11.1	11.2	-0.3321	-1.3202	1.6523	0.598025	0.928404	2.83257	19.1624
133	-3441.15	3.87192	98.8	96.4	98	99.4	97.9	11.6	67.5	19.9	10.6	11.2	0.153	1.4572	-1.6102	0.809999	0.883938	-2.8805	17.2437
134	-3441.15	3.8496	98.6	96.7	97.5	100.4	97.8	15.9	60	12.3	14.8	19.1	-0.4157	-1.4981	1.9138	0.565571	0.991524	3.26228	29.6709
135	-3441.1	3.84597	98.9	96.7	97.1	99.7	97.8	25.3	46.2	16.8	23.8	10.8	-0.7384	-1.4248	2.1632	0.317316	0.979486	3.56363	24.1905
136	-3441.22	3.86505	98.6	96.4	98	99.6	97.9	15.4	68.2	3	19.2	15.3	0.04	1.7943	-1.8343	0.956344	0.925247	-3.39544	18.6321
137	-3441.17	3.82668	98.9	96.8	98	98.3	98.5	34.9	27.6	10.2	38.4	11.1	-0.9164	-1.6414	2.5579	0.28344	1.00705	4.20004	39.0408
138	-3441.16	3.85552	99.9	96.5	97.4	99.2	98.4	11.3	79.7	8.6	10.1	10.7	-0.1122	-1.511	1.6232	0.861767	0.947992	2.93784	17.9838
139	-3441.07	3.84632	99.1	96.3	97.8	99.2	98.1	10.2	88.8	3.4	9.3	10.9	-0.076	-1.3824	1.4584	0.895763	1.00224	2.66065	17.6692
140	-3441.14	3.81625	98.2	96.4	97.4	99.7	98.2	30.4	49.8	4.7	27.6	12.7	-0.4371	-1.5436	1.9807	0.5586	0.937006	3.37243	26.9916
141	-3441.13	3.8473	99.2	96.4	97.6	99.3	98	11.2	81.5	8.5	10.2	10.5	-0.1935	-1.322	1.5155	0.744643	0.997153	2.67305	21.308
142	-3441.23	3.86153	99.3	96.5	97.4	99	97.7	11.3	81.5	7.9	10.6	11.6	-0.2264	-1.3552	1.5816	0.713657	0.922517	2.77195	17.009
143	-3441.15	3.87088	99.3	95.8	97.3	98.9	98.1	10.9	81.2	5.2	10.2	13.9	-0.3434	-1.334	1.6775	0.590547	0.903926	2.87188	18.6571
144	-3441.16	3.86576	98.8	95.6	97.4	99.6	98	10.2	61.6	24.5	12.2	12.4	-0.07	-1.3905	1.4606	0.904086	0.880368	2.66978	21.0876
145	-3441.11	3.85274	99.2	96.1	97.6	99.4	97.7	10.3	87.3	3.6	11.3	9.2	0.208	1.5141	-1.7221	0.75843	0.997131	-3.04636	41.3426
146	-3441.07	3.84833	98.6	96.6	97.4	99.6	97.4	18.7	68.7	4.2	21.2	10.3	0.2163	1.6704	-1.8867	0.770694	0.951876	-3.34638	19.9032
147	-3441.24	3.86554	98.7	96.8	97.6	99.1	98	14.4	67.3	11.1	16.2	11.9	-0.4289	-1.4288	1.8577	0.538275	0.978678	3.1523	30.2682
148	-3441.19	3.89205	99.1	96.8	97.8	99.3	97.5	10.9	73.1	12.9	11.6	10	0.2299	1.3152	-1.545	0.702423	0.904651	-2.70172	17.8553
149	-3441.17	3.85227	98.2	96.6	98.2	99.1	98.2	29.1	50.5	9.4	20.9	11.9	-0.9357	-1.563	2.4987	0.251018	0.967999	4.09133	27.2763
150	-3441.22	3.85997	98.9	95.9	97.7	99.5	97.4	11	84.7	4.2	12.3	10.7	-0.0044	-1.6047	1.6091	0.994575	0.932209	3.00673	18.5257
151	-3441.15	3.88638	99	96.4	97.8	99.7	98	10.3	71.2	12.6	12.7	11.8	-0.0872	-1.5481	1.6353	0.893301	0.904399	2.98161	18.1379
152	-3441.08	3.84949	98.3	96.4	97.6	99	98.1	18.3	59.4	9.2	24.2	11.8	-0.5097	-1.4473	1.957	0.479115	0.919802	3.2903	20.741
153	-3441.1	3.87455	99.3	96.6	97.6	98.8	97.6	12.8	77.6	3.7	12.7	14.1	0.0386	1.5727	-1.6113	0.952039	0.903283	-2.97953	21.4015
154	-3441.21	3.84566	98.4	96.6	97	98.9	97.6	13.1	75.7	8.4	12.3	13.8	-0.286	-1.253	1.5389	0.628341	0.933953	2.65279	18.3399
155	-3441.21	3.85519	99	96.4	98.1	99.5	97.9	16.6	78.5	4.3	12.5	10.8	-0.2707	-1.5424	1.8131	0.701399	0.983078	3.16981	21.7655
156	-3441.14	3.85047	99	96.8	97.5	98.5	98	15.5	64.6	13	17.9	11	-0.5438	-1.5143	2.058	0.471574	0.97521	3.45635	21.8923
157	-3441.22	3.82931	99.7	96.5	97.3	99.3	97.5	12	69	14.4	10.9	15	-0.1453	-1.4371	1.5824	0.816358	0.922203	2.83472	23.9218
158	-3441.23	3.86128	98.7	96.9	97.8	98.3	98.6	18.4	63.6	3.8	20.3	14.5	-0.2298	-1.8504	2.0802	0.779078	1.0121	3.69618	18.3109
159	-3441.2	3.86313	99.2	96.6	97.4	100.3	97.6	9.7	82.2	8.3	10.8	10.5	-0.055	-1.4122	1.4672	0.925076	0.977743	2.69535	19.492
160	-3441.08	3.88057	100.1	96	97.4	99.4	97.3	10.9	78.7	4.1	10.1	15.9	-0.1207	-1.4557	1.5765	0.846839	0.929117	2.84359	20.2815
161	-3441.14	3.88451	99.1	96.1	97.8	99.7	98	10.2	75.6	5.5	13.1	14.8	-0.0843	-1.4619	1.5462	0.890941	0.861004	2.81754	14.7132
162	-3441.2	3.87422	99.2	95.9	97.9	99.5	97.8	10.6	80.3	6.4	12	11.7	-0.0244	-1.4025	1.4269	0.965738	0.89558	2.64734	16.8954
163	-3441.14	3.86878	99.3	96.7	98.1	99.4	97.5	8.9	82	5.3	12.1	12	-0.1602	-1.4503	1.6105	0.801091	0.96969	2.8753	18.8685
164	-3441.15	3.84962	99.1	95.9	97.5	99.1	97.8	14.4	77.3	3.4	13.8	12.4	-0.0227	-1.4714	1.4941	0.969558	0.943438	2.77462	30.2987
165	-3441.06	3.87908	98.7	96.2	97.4	100.6	98	9.8	67.5	19.3	12.6	11.5	-0.0998	-1.415	1.5147	0.868256	0.916624	2.74568	18.4164
166	-3441.15	3.85572	98.8	96.6	97.9	99.5	98.1	11.2	78.4	10.7	10.1	10.5	-0.2081	-1.4572	1.6653	0.750091	0.973648	2.94078	20.3456
167	-3441.24	3.87163	99.4	96.5	97.5	98.7	98.1	11.1	78.4	7.9	12.3	11	-0.2378	-1.4285	1.6663	0.714562	0.946994	2.92089	18.1753
168	-3441.21	3.85925	98.2	96.7	97.7	99.2	98.2	9.5	81.8	7	12.6	10.7	-0.003	-1.3993	1.4023	0.995763	0.951135	2.62108	17.1589
169	-3441.15	3.85624	99.4	95.8	97	98.9	98.4	27.5	41.4	14.2	24.8	13.5	-0.7236	-1.4032	2.1268	0.31954	0.885672	3.5045	18.4042
170	-3441.13	3.84672	98.9	96.9	97.7	98.9	98.2	10.6	79.2	7.8	13.3	11.5	-0.4766	-1.5156	1.9922	0.521532	0.967668	3.37136	21.5245
171	-3441.27	3.8993	99.5	96.1	97.9	99.4	97.6	9.9	72	14.3	10.5	9.7	-0.0473	-1.6442	1.6914	0.944122	0.937946	3.12157	20.8803
172	-3441.17	3.86309	98.6	96.6	97.3	98.8	97.9	8.9	66.7	24.1	10.9	9.7	-0.0205	-1.5511	1.5716	0.973886	1.0227	2.92173	21.0944
173	-3441.17	3.883	99.2	96.2	98.1	98.9	98	13.4	68.5	15.4	11.9	9.6	-0.2982	-1.4066	1.7048	0.650152	0.984331	2.95077	21.3642
174	-3441.1	3.87514	99.5	96.3	98.2	99.1	98.2	10.2	85.7	3.6	9.6	10.5	-0.3373	-1.4284	1.7657	0.617938	1.01525	3.03792	19.303
175	-3441.15	3.88252	99	96.6	97.7	99.6	98.1	14.6	70.5	9.2	13.2	13.2	-0.2491	-1.4775	1.7266	0.711472	0.923161	3.02472	18.4652
176	-3441.23	3.86501	99	96.1	97.5	98.9	97.9	12.9	81.7	4	12.5	9.8	0.185	1.2356	-1.4205	0.739556	0.943795	-2.50298	18.309
177	-3441.18	3.85135	99.7	96.5	98	98.8	97.6	19.1	66.3	9.3	16.9	10.9	-0.3054	-1.5416	1.847	0.669264	0.953993	3.20872	19.8536
178	-3441.25	3.86005	98.9	96.6	97.5	99.1	98.1	9.5	82.8	8.5	11.2	10	-0.1627	-1.3249	1.4876	0.781296	0.99469	2.64448	19.3398
179	-3441.24	3.82081	98.5	96.7	97.8	99.3	97.9	39.5	34	4.8	33.9	11.1	-0.8988	-1.5608	2.4595	0.269151	1.01358	4.0334	26.5239
180	-3441.18	3.8666	99.1	95.9	97.1	99.5	97.8	10	80.8	6.3	11.8	11.8	-0.0755	-1.5361	1.6116	0.906283	0.90619	2.94749	17.505
181	-3441.16	3.86136	98.9	96.3	97.7	99.1	98.3	9	76.3	11	11.6	12.1	-0.1902	-1.2414	1.4316	0.734273	0.939235	2.51968	19.1814
182	-3441.09	3.88065	99.7	96.6	97.8	99.3	97.7	11.3	79.3	3.7	10.3	15.3	-0.1752	-1.3153	1.4906	0.764866	0.90292	2.64041	18.6391
183	-3441.2	3.87475	99.2	96.4	97.7	99.8	98.3	9.9	77.6	10	10.8	11.4	-0.2167	-1.2651	1.4818	0.707525	0.949751	2.59384	17.4682
184	-3441.1	3.84593	99	96.8	97.8	98.9	97.4	9.1	82.4	8.5	10.8	11	-0.3694	-1.1339	1.5033	0.508523	0.991408	2.53879	19.6061
185	-3441.2	3.87137	99.6	96.7	97.7	99.1	97.4	12.1	83.5	5.4	10.5	10.5	0.1194	1.5045	-1.6238	0.852976	0.919892	-2.9331	18.9913
186	-3441.13	3.86293	99.1	96.6	97.2	99.7	97.7	10.1	78.3	9.4	13.8	10.8	0.0308	1.3307	-1.3615	0.954784	0.942731	-2.51927	16.0711
187	-3441.13	3.90298	99.4	95.9	98	99.6	98.3	11.2	75.2	6.5	10.4	15	-0.5201	-1.1587	1.6788	0.380413	0.877837	2.78524	18.3656
188	-3441.22	3.88121	99	96.1	97.6	99.9	98.1	13.5	69.3	8.7	16.1	13	-0.691	-1.3263	2.0173	0.314951	0.906531	3.32255	18.7939
189	-3441.14	3.87149	99.4	96.7	97.1	99.5	97.9	11.8	70.8	17.8	9.6	10.3	0.0005	1.5572	-1.5578	0.999323	0.954088	-2.91431	37.381
190	-3441.2	3.85756	99.2	95.8	97.3	99.5	97.5	10.5	78.6	10.1	11.4	12.2	-0.1358	-1.2651	1.4008	0.806153	0.877609	2.5038	17.9429
191	-3441.1	3.88	99.3	96.4	97.5	99.6	98.3	10.6	80.5	6.2	10.7	10.7	0.132	1.4438	-1.5758	0.832486	0.954384	-2.83314	17.4301
192	-3441.22	3.80376	98.2	96.3	97.2	98.9	97.9	43.3	34	5	32	12.5	-0.8005	-1.6084	2.4089	0.335401	0.950852	3.97605	26.8638
193	-3441.12	3.88185	99.4	96.5	97.9	99.3	97.7	9.7	81.6	6.8	10.8	10.3	-0.1938	-1.506	1.6998	0.771977	0.993018	3.01571	18.2573
194	-3441.04	3.86914	98.8	96.4	97.9	99.3	97.7	9.2	82.7	5.4	11.2	11.8	-0.3231	-1.4314	1.7545	0.631697	0.917848	3.02632	18.4376
195	-3441.17	3.86268	98.9	96.5	97.2	99.6	98.3	9.2	85.1	4.9	10.8	10.5	-0.2297	-1.656	1.8857	0.756348	0.997985	3.33435	21.0378
196	-3441.2	3.87472	99.6	96.6	97.7	99	98.1	12.5	77.5	4.4	13.4	13.6	-0.1935	-1.4291	1.6225	0.761541	0.854442	2.87216	18.806
197	-3441.13	3.84377	98.5	96.4	97.8	99.5	98.1	18.3	64.4	4.7	20.1	14.9	-0.206	-1.7698	1.9759	0.791467	0.944096	3.52022	44.3741
198	-3441.23	3.83226	98.8	96.6	97.5	99	98.6	34.9	32.9	5.7	37.8	11.8	-1.0389	-1.4613	2.5002	0.168972	1.02059	4.07061	31.4554
199	-3441.2	3.86879	98.9	96.3	97.4	99.6	98.3	9.8	82.6	7.2	12.1	10.1	0.0016	1.4768	-1.4785	0.997782	0.947232	-2.7649	20.3412
200	-3441.08	3.86914	98.9	96.3	98.5	99.1	98.5	9.5	80.8	5.6	11.4	11.8	-0.4749	-1.521	1.9959	0.524082	0.992743	3.37908	21.5157
201	-3441.22	3.90264	99.6	96.4	97.8	98.7	98.5	11.8	73	8.2	13.8	10.4	0.0406	1.3402	-1.3807	0.941248	0.909069	-2.54644	15.7252
202	-3441.18	3.86526	99.2	96.7	98.4	99	98.3	12.1	82.7	6.1	10.4	8.9	-0.1059	-1.3194	1.4253	0.851337	1.01131	2.57354	15.9093
203	-3441.19	3.861	99.3	96.7	97.6	99.6	98.6	11.2	71.4	8.3	18.3	10.6	-0.3154	-1.5647	1.8801	0.664437	0.982838	3.26311	21.4834
204	-3441.15	3.85224	99.5	96.3	97.4	99.1	98.2	30.8	47.6	6.2	27.7	11.8	-0.6428	-1.7173	2.3601	0.455305	0.910986	3.95429	18.0451
205	-3441.13	3.89014	99.8	97	97.4	99.1	98.2	17.8	68	8.2	12.4	11.2	-0.386	-1.442	1.828	0.577659	0.936139	3.12258	18.2899
206	-3441.18	3.86114	99.5	96.3	97.8	99.3	97.9	11.4	79	6.9	12.8	10.8	0.0209	1.4285	-1.4494	0.971124	0.929006	-2.69271	21.645
207	-3441.09	3.87333	99.4	96.3	98.1	98.8	97.8	10.2	86.2	3.3	9.3	10.2	0.0238	1.4979	-1.5218	0.968685	1.00501	-2.82539	21.6586
208	-3441.15	3.86725	99.4	96.3	97.8	98.6	97.7	13.6	67.6	19.1	9.8	11.1	-0.2776	-1.5963	1.8739	0.703729	0.994344	3.27764	21.5385
209	-3441.11	3.84104	99	96	96.9	98.5	97	12.3	79.5	6.9	10.4	14.1	-0.2848	-1.345	1.6298	0.65048	0.875189	2.82107	24.6996
210	-3441.07	3.86145	99.8	96.8	97.4	99.4	98.2	17.4	57.6	12.2	22.4	12.4	-0.5026	-1.3738	1.8764	0.464261	0.916746	3.14802	20.8533
211	-3441.13	3.87229	99.6	96.7	97.8	99	97.5	10.2	77	13.1	9.3	10.9	-0.289	-1.3734	1.6624	0.652288	0.988602	2.87848	22.2737
212	-3441.12	3.87275	99	96.7	98.1	99.6	97.6	10.9	82.3	6.2	11.3	9.5	0.059	1.455	-1.514	0.922064	0.923276	-2.7794	17.563
213	-3441.17	3.85588	98.8	96.3	97.3	99.2	98.4	12	77.9	9.2	11.6	10.9	-0.6439	-1.2475	1.8914	0.319167	0.965132	3.11653	38.1146
214	-3441.19	3.87995	99.4	96.8	97.5	99.7	97.3	11.3	69.4	14	11.3	14.4	0.1199	1.473	-1.5929	0.849475	0.902289	-2.875	19.6354
215	-3441.22	3.85369	99.4	96.5	97.7	99.8	98.1	10.8	80.9	3.8	13.2	11.4	-0.1265	-1.519	1.6455	0.846286	0.961821	2.96772	24.1192
216	-3441.23	3.85637	99.6	95.9	97.4	98.8	97.9	10.6	72.3	15.4	12.3	10.1	-0.184	-1.3052	1.4891	0.752911	0.958173	2.63118	21.8253
217	-3441.11	3.85304	98.4	96.1	97.2	98.9	97.3	20.2	59.5	5.2	25.1	12.2	-0.1953	-1.7446	1.9399	0.798633	0.91091	3.46154	21.2679
218	-3441.23	3.87779	100.2	96.8	96.9	99.1	97.3	11.3	38.5	49.9	10.6	10.5	0.1748	1.064	-1.2388	0.717821	0.896482	-2.17291	26.2974
219	-3441.2	3.89949	99.2	96.1	98.2	99.1	98.1	14.1	68.9	5.5	16.7	11.9	-0.1308	-1.5084	1.6392	0.840424	0.920385	2.95244	17.837
220	-3441.18	3.89346	99.6	96.4	98.4	99.7	98.6	10.3	74.1	10.2	12	10.5	-0.3002	-1.2929	1.5932	0.623093	0.957657	2.74362	20.0712
221	-3441.19	3.87968	99	96.5	97.6	99.7	98	9.8	64.5	22.5	12.1	10.5	0.0566	1.3716	-1.4282	0.920778	0.930593	-2.62098	21.3872
222	-3441.19	3.87799	99.4	96.3	97.4	98.7	97.7	14.7	69.8	9.6	15.3	11.5	-0.2093	-1.4926	1.7018	0.754084	0.886119	3.00773	18.6406
223	-3441.18	3.87792	99.6	96.8	97.3	99.5	98.3	13.7	68.3	8.9	14	14	-0.3711	-1.2808	1.6518	0.550731	0.893522	2.80876	21.1545
224	-3441.21	3.87687	98.9	95.8	97.9	100	98.6	7.9	79.7	8.2	13.9	10.8	-0.109	-1.4628	1.5718	0.86131	0.940264	2.84464	18.5274
225	-3441.17	3.86037	98.4	96.9	98	99.4	98	24.5	49.3	8.5	26.1	11.9	-0.625	-1.5449	2.1699	0.42397	0.983515	3.62004	20.7048
226	-3441.13	3.83582	99.6	96.2	97.2	99	98	30.1	31.3	26.6	23.6	12	-0.2257	-1.848	2.0738	0.782288	0.977521	3.68729	36.226
227	-3441.24	3.86319	100	96.7	98.1	98.7	98	11.5	80	3.6	10.4	15.9	0.1298	1.2514	-1.3812	0.812044	0.9312	-2.47199	17.7157
228	-3441.09	3.83935	99.2	96.4	97.9	99	97.1	10.2	85.8	5	10.8	13.1	-0.2668	-1.257	1.5238	0.649843	0.930063	2.6373	17.4965
229	-3441.17	3.89163	99.6	96.3	97.8	98.8	98.2	11.3	76.6	7.4	11.6	12.1	-0.2005	-1.2418	1.4423	0.722034	0.912952	2.53208	19.3051
230	-3441.23	3.88156	98.4	96.3	97.7	100.1	98.1	9.7	79.7	5.5	12.1	13	-0.1441	-1.3299	1.474	0.804516	0.901851	2.6336	19.0985
231	-3441.21	3.8846	99.5	96.6	97.7	98.7	98.8	10.3	77.6	6.2	9.9	14.4	-0.3802	-1.2197	1.5999	0.524779	0.935895	2.70894	23.0014
232	-3441.19	3.86498	98.9	96.1	97.8	99.6	97.6	10.5	79.4	8.4	11.4	11.5	-0.3132	-1.2996	1.6128	0.61163	0.945186	2.77163	16.8754
233	-3441.03	3.86732	99.8	96.1	97.6	99.4	98.2	15.6	69.1	7.5	17.4	10.1	0.6249	1.3716	-1.9965	0.374041	0.971096	-3.30976	23.3962
234	-3441.18	3.84042	99.8	96.7	97.7	99.2	97.6	11.4	73.8	12.3	10.7	13.9	0.0595	1.2716	-1.3311	0.910598	0.927622	-2.43699	19.7524
235	-3441.2	3.88575	99.1	96.1	97.8	99.5	97.8	11.4	77	8.6	11.7	11.4	-0.0953	-1.3787	1.474	0.870631	0.905066	2.67332	16.4074
236	-3441.2	3.86223	99	96.3	97.7	99.1	98.2	8.4	76.5	12.6	12.2	11.1	-0.171	-1.39	1.561	0.780938	0.954702	2.7747	21.469
237	-3441.18	3.81325	98.9	96.6	97.9	98.5	97.9	41.8	18.9	3.5	48.7	12.5	-1.0047	-1.6004	2.6051	0.22868	1.00013	4.25799	39.9309
238	-3441.12	3.84917	99.2	96.7	97.1	99.5	98.2	9.8	78.3	10.2	10.9	12.8	-0.0629	-1.4218	1.4847	0.915328	0.980918	2.72112	17.1676
239	-3441.04	3.87867	99.2	96.4	97.6	99.6	98	10.8	77.4	8.2	10	12.8	-0.1673	-1.2919	1.4592	0.770632	0.922282	2.58806	18.3544
240	-3441.07	3.83863	98.7	96.4	97.8	99.5	97.7	16.1	64.6	14.8	13.5	14.8	-0.7696	-1.1658	1.9354	0.204684	0.942353	3.1581	21.0605
241	-3441.29	3.85841	99	96.5	97.5	99.1	97.4	12.6	68.4	8.3	16.2	15.8	-0.2501	-1.3967	1.6467	0.696306	0.94596	2.876	20.1977
242	-3441.11	3.85601	99.2	96.2	97.5	100	98.1	9.2	85.7	3.8	9.6	13.1	-0.3123	-1.373	1.6854	0.629383	0.991573	2.90575	18.5299
243	-3441.27	3.85552	99.6	96.2	97.4	99.1	97.2	12.2	82.1	4.9	10.3	13.5	0.0227	1.2705	-1.2932	0.964874	0.903846	-2.39873	18.433
244	-3441.16	3.8513	99.1	95.8	97.3	98.9	98.3	16.6	70.6	4.8	17.7	12.6	-0.1721	-1.6948	1.8669	0.815666	0.913992	3.34384	24.0207
245	-3441.17	3.88158	99.3	96.6	97.4	99.3	98.2	12.1	71.9	8.1	14.7	11.8	-0.05	-1.5953	1.6453	0.939208	0.95521	3.03288	20.6869
246	-3441.16	3.89629	98.9	96.4	97.7	99.3	97.9	12.1	60.9	16.9	14.4	14.4	-0.1021	-1.2408	1.3429	0.847946	0.760227	2.42294	13.9893
247	-3441.19	3.87641	98.9	96.2	97.4	100.2	97.7	8.6	76	11.3	12.4	11	-0.1093	-1.4785	1.5878	0.862379	0.94326	2.87422	18.6351
248	-3441.2	3.86351	99.3	96	97.8	99.2	97.6	13.6	80.1	4.1	11.2	11.8	-0.0857	-1.638	1.7237	0.900539	0.888647	3.14818	21.7846
249	-3441.13	3.85206	98.7	96.3	97.7	98.5	97.9	20	60.3	11.4	17.2	13.9	-0.6336	-1.3158	1.9494	0.349923	0.85233	3.22278	20.9168
250	-3441.21	3.87497	99.1	96.9	98	99.7	97.4	10.6	80.5	4.5	13.9	12.1	-0.0722	-1.454	1.5262	0.905445	0.939262	2.79066	17.375
251	-3441.19	3.85977	98.5	96.7	97.5	99.1	98.1	9.2	83.3	5.5	10.1	12.9	-0.2847	-1.3258	1.6106	0.64642	1.00146	2.78569	20.2509
252	-3441.17	3.87066	99	96.4	97.6	99.6	97.5	10	80.3	7.1	12.9	10.5	-0.1089	-1.2542	1.3631	0.840178	0.948047	2.45501	17.4343
253	-3441.15	3.86762	98.5	96.2	97.2	99.4	98.1	12.4	78.1	5.3	13.8	11.2	-0.2547	-1.4963	1.7511	0.70907	0.961356	3.06606	18.6928
254	-3441.16	3.86701	98.8	96.3	98.1	99.7	97.7	10.2	82.4	3.5	12.2	12.7	-0.052	-1.7057	1.7577	0.940825	0.901552	3.24138	18.2462
255	-3441.14	3.87477	99	96.5	97.8	99.3	97.9	12.7	76	10.1	12	9.5	0.0452	1.4533	-1.4985	0.939699	0.973631	-2.76251	18.2906
256	-3441.2	3.88996	98.6	96.3	97.6	99.7	98.3	9.3	81.8	4.8	11.4	10.9	-0.2532	-1.5669	1.8201	0.721757	0.946628	3.19527	18.2686
257	-3441.13	3.86531	99.1	96	98	99.8	98.4	10.7	80.6	5.7	10.3	12.7	0.0275	1.6137	-1.6412	0.966463	0.931921	-3.04544	16.9971
258	-3441.13	3.84043	99.3	96.9	98	98.4	97.3	12.9	75.9	4.4	15.8	13.9	0.0511	1.6201	-1.6711	0.938861	0.967262	-3.08024	19.9609
259	-3441.14	3.87846	99.1	96.6	97.5	99.8	98	8.5	81.2	8.1	11.8	10.4	-0.1332	-1.4542	1.5874	0.832119	0.968878	2.8538	18.4582
260	-3441.18	3.8816	99.4	96.6	98	99.7	98	12	73.5	5.4	11.2	16.6	0.0405	1.2356	-1.2761	0.936546	0.867311	-2.35078	14.9529
261	-3441.22	3.86249	98.9	97	97.4	99.7	98.6	13.1	68	14.6	14.1	11	-0.1042	-1.4951	1.5993	0.869694	1.00466	2.89997	20.8187
262	-3441.14	3.85971	99	96.2	97.5	100	98.3	17	68.3	7.6	17	10	-0.4699	-1.2719	1.7418	0.460442	0.971902	2.92059	18.6318
263	-3441.14	3.84961	98.9	96.8	97.4	99.3	97.6	10.7	75.4	9.3	12.2	13.4	-0.1034	-1.4707	1.5741	0.868662	1.03309	2.85357	20.607
264	-3441.21	3.86206	98.6	96.7	97.7	98.6	97.5	19.2	62.6	11.1	17.1	11.9	-0.4562	-1.3751	1.8313	0.501812	0.866637	3.08948	20.3594
265	-3441.2	3.87964	98.6	96.7	98.1	100.2	97.8	12.5	56.5	22.6	17.7	11	-0.2937	-1.6164	1.91	0.692475	0.958159	3.33333	21.5316
266	-3441.16	3.88285	99.7	96.8	97.4	99.2	97.8	11.6	37.4	48.9	9.5	11.4	-0.0956	-1.4115	1.5071	0.873102	0.930461	2.73493	37.5216
267	-3441.2	3.83321	98.8	96.6	96.8	99.4	97.8	10.1	77.3	11.3	14	11.2	-0.483	-1.1312	1.6141	0.401577	0.970216	2.68497	24.0931
268	-3441.17	3.8801	99.2	95.7	97.9	99.4	98.1	9.6	81	8.2	11.3	10.1	-0.1376	-1.6628	1.8004	0.847189	0.938859	3.24772	18.7105
269	-3441.22	3.89107	99.8	96	97.7	99.5	97.9	11.1	78	5.9	12.2	11.2	-0.0578	-1.6492	1.707	0.932277	0.899453	3.14132	17.0103
270	-3441.23	3.84906	99.4	96.2	97.5	98.7	97.6	10.3	74.1	12.9	12	13.8	-0.0808	-1.323	1.4038	0.884905	0.953818	2.55448	18.6823
271	-3441.21	3.86098	98	96.4	97.8	99.7	98	9.5	69.1	16.4	13.2	12.4	-0.1699	-1.4936	1.6635	0.795776	0.961375	2.96643	21.6843
272	-3441.17	3.87184	99.3	96.4	97.6	99.1	98	10.8	78.1	9.8	9.4	12.2	-0.219	-1.2791	1.4981	0.707573	0.97596	2.6224	17.5884
273	-3441.05	3.85102	99.2	96.5	97.6	98.8	98	10.4	76.3	12.4	10.3	13.4	-0.3843	-1.1874	1.5716	0.511015	0.986751	2.6553	19.1075
274	-3441.2	3.88014	98.9	96.3	97.8	99.4	98.3	11.4	72.9	9.1	14.5	11.2	-0.1448	-1.8629	2.0077	0.855768	0.913375	3.62887	18.8133
275	-3441.22	3.83074	99.6	96.1	97.6	98.5	97.9	11	81.7	5.2	9.8	13.9	-0.0225	-1.4595	1.482	0.969665	0.930152	2.75227	21.7799
276	-3441.19	3.85039	98.9	96.6	97.5	99.7	98.5	9.5	81.4	5.4	12.1	13.8	-0.2529	-1.3427	1.5956	0.683008	0.956487	2.77933	15.6729
277	-3441.17	3.86143	99.2	96.1	98	99.9	97.9	9.9	83	4.9	13.2	10.8	0.0792	1.4932	-1.5724	0.899261	0.950578	-2.87093	18.8465
278	-3441.19	3.87813	99.7	96.7	97.6	99.4	98.5	11.3	75	11.4	9.9	11.3	-0.4139	-1.3723	1.7863	0.53654	0.951007	3.03023	21.4469
279	-3441.18	3.86405	99	97	97.6	98.5	98.6	9.9	65.4	18.7	14.2	11.4	-0.3389	-1.2942	1.6331	0.584989	1.0017	2.79315	18.5438
280	-3441.2	3.83525	98.7	97	97.4	99.5	97.2	29.9	42.7	4.7	29.9	15.2	-0.6327	-1.636	2.2688	0.442213	0.983108	3.79435	27.0175
281	-3441.18	3.89945	99	96.9	98.3	99.3	98.1	10.8	74.3	11.1	11.8	10.8	0.1643	1.3491	-1.5134	0.782853	0.944107	-2.69118	16.6765
282	-3441.22	3.85709	99	96.2	96.8	99.3	98.3	9.6	76.8	9.7	10.7	15.3	-0.6194	-1.0926	1.712	0.276357	0.895983	2.80928	20.9766
283	-3441.22	3.87133	98.8	96.9	98.4	99.1	98.1	19	64.2	7.4	17.5	11.2	-0.2487	-1.5289	1.7776	0.720187	0.971364	3.11952	18.7754
284	-3441.12	3.8704	98.9	96.2	97.8	99.5	98.2	17	65.1	7.9	18.2	11.5	-0.326	-1.457	1.783	0.634299	0.918431	3.07689	21.5471
285	-3441.09	3.87127	99.3	96.4	98	99.7	98	10.6	82.5	5.1	9.8	13	-0.6049	-1.1505	1.7553	0.310841	0.911217	2.88989	21.1186
286	-3441.21	3.85524	99	96.6	97.2	98.9	97.9	11.5	75.2	13.2	9.3	13.5	-0.501	-1.1486	1.6496	0.392533	0.963316	2.74089	19.5245
287	-3441.12	3.88763	98.2	96.2	98.1	99.3	98.1	11.8	70	15.3	13.1	9.8	-0.3655	-1.418	1.7836	0.590102	0.990777	3.05329	20.6034
288	-3441.09	3.8632	99.1	96.9	96.7	99.4	97.9	14	26.4	52.7	14.5	13.9	0.0274	1.4739	-1.5013	0.963453	0.918001	-2.7838	27.2367
289	-3441.18	3.86447	99.2	96.7	98.1	99.4	97.9	8.9	83.3	6.6	11.1	10.3	-0.0533	-1.6149	1.6683	0.93607	0.981197	3.07288	17.3444
290	-3441.19	3.89949	99.3	96.2	97.5	99.3	98.1	11.4	74.4	8	11.4	12.7	-0.1845	-1.6318	1.8163	0.796822	0.898608	3.23969	14.5786
291	-3441.18	3.85706	98.9	96	97	99.2	97.8	13.1	78.2	7.9	11.9	11	-0.2959	-1.3193	1.6153	0.633578	0.93522	2.78711	18.019
292	-3441.18	3.83896	98.8	97	97	99.5	97.8	26.2	27.6	21.5	34.3	14.7	-0.3324	-1.8655	2.1979	0.697531	0.932676	3.8396	26.6713
293	-3441.03	3.84529	99	96.5	96.9	99.1	97.2	17	60.3	20	12.1	13.1	-0.2182	-1.318	1.5362	0.71593	0.880237	2.69358	21.8305
294	-3441.19	3.884	98.3	96.5	97.5	100.3	98.2	9.8	76.5	8.7	12.5	12.3	-0.3345	-1.1628	1.4973	0.553244	0.952135	2.54703	18.517
295	-3441.13	3.86381	98.7	96.2	98.2	99.6	97.6	11.9	80.8	4.7	13.2	10.4	0.0553	1.2877	-1.343	0.917625	0.897503	-2.46289	16.0984
296	-3441.21	3.88813	99.2	96.2	98	99.7	97.8	9.7	81.3	6.7	11.6	10.5	-0.1634	-1.4375	1.6008	0.795899	0.940303	2.85481	21.5987
297	-3441.13	3.85896	98.5	96.6	98	99.5	97.8	9.4	82.2	7.9	11.2	9.8	0.0264	1.5702	-1.5966	0.96693	0.976624	-2.96299	17.4595
298	-3441.24	3.84018	99.1	95.8	97.8	99.8	98.1	11.1	76.9	6.6	11.8	16.2	-0.4901	-1.2204	1.7105	0.426982	0.954146	2.85479	19.5452
299	-3441.17	3.84577	99	96.3	97.7	99.6	97.9	15.1	74.3	4.9	17.5	11.3	-0.1122	-1.5906	1.7028	0.868223	0.937341	3.08649	18.8516
300	-3441.11	3.87354	99.2	96.3	98.2	98.6	97.9	12.9	74	12.1	11.1	10	0.028	1.5933	-1.6214	0.965415	0.948266	-3.00792	18.9822
301	-3441.2	3.87909	99.5	96.2	97.7	98.6	98	10.8	81.9	4.4	10.7	11.7	-0.1554	-1.568	1.7234	0.819635	0.982696	3.08967	21.1529
302	-3441.19	3.91107	99.3	96.3	97.2	99.5	97.9	12.1	72.4	10.7	12.1	10.7	0.2536	1.2905	-1.5441	0.671576	0.874587	-2.68355	17.8465
303	-3441.19	3.88408	99.4	96.2	97.8	99.7	97.9	9.7	84.6	3.9	11.2	11.3	-0.0918	-1.372	1.4638	0.874557	0.938968	2.65718	21.0048
304	-3441.15	3.85248	99.4	96	97.4	99.8	97.6	11.1	81.4	4	11.9	13.4	-0.0527	-1.3791	1.4317	0.92641	0.927932	2.63106	24.0281
305	-3441.2	3.89283	99.1	96.2	98.1	99.8	97.6	10.8	79.5	4.9	12.1	12.5	0.1715	1.3221	-1.4935	0.770392	0.926169	-2.64878	17.8703
306	-3441.11	3.84828	99.2	96.3	97.8	99.3	98	10.3	77.7	10.3	11	12.1	0.0195	1.7352	-1.7547	0.977774	0.91126	-3.26511	18.2793
307	-3441.11	3.88054	98.9	96.3	98.2	98.8	97.9	8.6	82	3.5	11.6	12.8	-0.2068	-1.5709	1.7778	0.767305	0.972909	3.15082	19.1829
308	-3441.16	3.87074	98.9	96.5	97.3	98.7	97.6	9.9	78.7	4.5	10.1	17.8	-0.4864	-1.2294	1.7158	0.433055	0.865222	2.86594	18.7879
309	-3441.24	3.86488	99.8	96.4	97.4	99.1	97.8	12	82.6	5.7	10.1	9.7	0.1636	1.4285	-1.5922	0.794449	0.924971	-2.83845	14.629
310	-3441.14	3.86835	99.8	96.5	98	98.8	97.9	10.8	78.3	6.6	9.7	15	-0.2643	-1.2072	1.4715	0.640763	0.921844	2.54239	18.4202
311	-3441.15	3.87356	99.1	96.3	97.7	99.8	97.8	17.5	68.3	5.4	16.2	11.7	-0.3713	-1.5225	1.8938	0.60784	0.991637	3.25233	21.3499
312	-3441.22	3.90182	98.9	96.6	98.4	99.7	98.1	9.4	77.4	7.6	11.8	11.9	0.0407	1.7069	-1.7476	0.953398	0.946084	-3.23264	15.5376
313	-3441.18	3.87753	99.1	96.2	98	98.5	98	14.9	78.5	3.3	14	9.4	0.0953	1.7739	-1.8692	0.898082	0.933094	-3.41185	19.3252
314	-3441.15	3.85535	99	96.4	97.1	99.2	97.8	17	54.7	21.1	15.9	12	0.4941	1.2632	-1.7573	0.437674	0.92882	-2.93718	37.4914
315	-3441.11	3.80388	97.9	96.7	97.3	98.5	98.5	39.1	31.1	4.6	39.2	11.9	-0.799	-1.6251	2.4241	0.340823	0.959134	4.00344	19.2864
316	-3441.24	3.85182	99.2	96.6	97.4	99.4	98.7	14.3	72	9.5	15.7	10.2	-0.6083	-1.5581	2.1664	0.438404	0.972165	3.62132	24.583
317	-3441.09	3.88071	99.4	96.3	97	99.2	98.1	11.5	72.8	13.8	10.6	11.4	-0.1243	-1.3837	1.5079	0.835147	0.901926	2.71277	19.7027
318	-3441.2	3.86707	99.6	97.2	96.8	99.1	98	9.4	19.8	69.5	11.4	11.1	-0.0772	-1.3822	1.4594	0.894175	0.96406	2.66144	29.7845
319	-3441.17	3.85646	99.8	96.2	98.1	99	97.9	11.2	83.5	4.3	9.7	11.5	-0.0378	-1.472	1.5098	0.949982	0.989823	2.79035	19.7411
320	-3441.18	3.8779	99.4	95.8	98	99	98.4	11.9	80.8	3.6	12.1	10.8	0.1221	1.6794	-1.8014	0.864465	0.868515	-3.26251	20.1995
321	-3441.17	3.84944	99.3	96.8	97.7	99.3	97.7	12.9	75.6	8.8	12.3	12.7	-0.233	-1.3318	1.5648	0.702201	0.96013	2.73615	19.4938
322	-3441.19	3.86633	99	96.3	97.4	99	97.9	10.3	81.8	5.7	11.2	10.7	0.0099	1.5452	-1.5551	0.98729	0.955244	-2.90053	20.5036
323	-3441.16	3.89875	99.9	96.5	98.4	99.5	98.1	9.6	82.1	4.3	11.4	10.8	-0.0874	-1.6138	1.7012	0.89725	0.937424	3.10465	18.2217
324	-3441.07	3.89893	99.4	96.1	97.3	100.4	98.3	10.1	67.9	16.9	12.5	11.7	-0.1005	-1.4319	1.5324	0.86877	0.875079	2.77807	18.3275
325	-3441.13	3.79526	97.9	97.2	97.3	98.5	97.9	57.8	3.4	8.7	46.6	12	-1.3101	-1.6779	2.988	0.123106	0.958742	4.85411	45.7258
326	-3441.14	3.84854	99	96.1	97.4	98.9	97.9	14.1	70.1	4	20.9	12.5	0.2435	1.3867	-1.6302	0.701214	0.923058	-2.84998	23.4007
327	-3441.16	3.8833	99.7	96.5	97.2	98.7	98	12.4	79.9	4.5	10.6	12.5	-0.2953	-1.3655	1.6608	0.644435	0.913896	2.87147	18.4607
328	-3441.13	3.83746	98.3	96.2	97.7	99.5	97.5	24.7	59.3	8.1	20.4	10.7	-0.8423	-1.494	2.3363	0.278946	1.03081	3.83459	25.3695
329	-3441.17	3.84227	98.5	96.3	97.5	99.3	98.8	31.8	37.3	7.2	33.8	12.7	-0.6783	-1.5942	2.2725	0.402999	0.989911	3.78085	38.4347
330	-3441.11	3.87363	99.3	96.7	98.4	99	97.8	9.3	84.4	5.5	9.3	10.8	-0.2385	-1.2374	1.4759	0.67675	0.998016	2.56776	18.6232
331	-3441.2	3.85573	98.9	96.4	98.1	98.7	97.8	15.7	70.4	10.5	15	10.7	-0.3293	-1.4662	1.7954	0.633228	0.973417	3.09771	17.6701
332	-3441.11	3.84704	98.8	96.1	97.5	99.6	97.6	10.6	82.7	3.8	13.5	9.9	-0.1618	-1.5349	1.6968	0.809231	1.02847	3.03486	20.8356
333	-3441.18	3.83743	99.2	96.5	97.5	98.7	97.8	14.7	72	9.9	14.9	11.8	-0.5382	-1.2904	1.8287	0.411321	0.998287	3.04567	21.1752
334	-3441.2	3.85263	98	96.9	97.3	100.1	97.8	26.1	5.9	58.3	20.3	11.7	-0.8038	-1.2577	2.0615	0.220196	0.977815	3.36751	55.892
335	-3441.14	3.85917	99.1	96.3	97.3	99.7	97.5	9.5	78	12.3	12.1	10.7	-0.0249	-1.4119	1.4368	0.965351	0.951412	2.66552	18.5295
336	-3441.25	3.89862	99.9	96.5	97.6	99.7	98.2	12.2	66.6	9.7	14.8	15	-0.0538	-1.3816	1.4355	0.925016	0.845819	2.63704	16.5549
337	-3441.2	3.89639	100	96.2	97.6	99.9	97.8	11.3	77.2	4.8	11.8	14.1	0.0169	1.3707	-1.3876	0.975651	0.866225	-2.58079	18.9605
338	-3441.19	3.8497	98.7	96.3	97.5	99.3	98.5	10.3	70.5	13.8	15.8	11.4	-0.4356	-1.2539	1.6894	0.484349	0.96539	2.84268	22.4131
339	-3441.02	3.86997	99.7	95.9	97.4	99.1	97.8	12	81.1	4.3	9.8	13.2	-0.1298	-1.3531	1.4829	0.824976	0.876353	2.66163	18.4502
340	-3441.18	3.86093	99	96.2	97.6	99.2	98	10.5	77.4	12	11.2	11.6	-0.177	-1.2796	1.4566	0.75695	0.91952	2.57589	17.3712
341	-3441.17	3.85527	99	96.4	98.1	98.6	97.9	8.4	86.8	4.1	10.9	9.4	-0.0972	-1.5805	1.6777	0.884096	1.04423	3.05231	18.177
342	-3441.19	3.82617	98.9	96.4	97.4	98.7	98.1	28.3	44.3	7.5	31.9	12.9	-0.6623	-1.4906	2.1529	0.384765	0.959401	3.57373	26.6527
343	-3441.13	3.88705	99.2	96.5	97.8	99.8	97.8	10.2	83	3.7	11.6	10.7	0.1596	1.3546	-1.5142	0.789173	0.938647	-2.69643	27.3772
344	-3441.19	3.8569	99.1	97	97	99.1	97.6	13.6	80.7	4.4	11.1	11.7	0.0727	1.2028	-1.2755	0.885936	0.939921	-2.32165	18.6177
345	-3441.16	3.86912	98.5	96.2	97.5	99.2	97.6	10.7	76.8	8.5	11.9	12.4	-0.236	-1.4546	1.6906	0.720774	0.888093	2.96727	14.4373
346	-3441.08	3.86552	98.5	95.9	97.7	99.7	97.8	10.6	76	6.2	11.9	16.3	-0.3404	-1.3026	1.643	0.585605	0.908036	2.81052	21.5687
347	-3441.2	3.85159	99.2	96.2	97.7	99.6	98.1	9.4	79.3	10.1	10.7	12.3	-0.3493	-1.2448	1.594	0.561762	0.976449	2.71551	18.7894
348	-3441.06	3.83887	99.6	96.4	97.1	99.4	97.5	14.4	76.8	3.5	11.6	16.4	-0.2971	-1.4312	1.7283	0.656214	0.942265	2.99493	28.4078
349	-3441.2	3.85947	98.6	95.7	97.4	99.1	97.6	10.6	78.9	9.9	11.5	12	-0.1468	-1.1103	1.2571	0.766455	0.871192	2.22767	15.7071
350	-3441.06	3.83072	98.7	96.6	97.4	99.6	97.9	18.8	68.1	6	19.4	12.3	-0.1973	-1.5301	1.7274	0.77154	0.927546	3.06431	22.0774
351	-3441.15	3.8532	98.9	96.9	98.2	99	97.9	10.9	77.3	3.9	14.5	15.7	-0.2185	-1.6556	1.8741	0.766819	0.983887	3.32118	23.7862
352	-3441.11	3.84911	99.5	96.5	97.3	99.3	97.5	12.8	60.4	22.1	16.7	11.4	-0.15	-1.5412	1.6911	0.822627	0.861109	3.03378	19.9833
353	-3441.12	3.86784	99.3	96.9	97.9	99.2	98	12.2	60.4	15.7	17.4	13.2	-0.5994	-1.2493	1.8487	0.351549	1.02813	3.05675	20.9469
354	-3441.17	3.87999	99.4	95.8	97.9	99.5	97.6	10.5	79.3	5.3	12.5	13.2	-0.0609	-1.5157	1.5766	0.922767	0.892127	2.89477	18.6778
355	-3441.18	3.9179	99.3	96.5	97.8	99.9	97.5	11.3	68.6	15.2	11.4	9.9	0.1149	1.4113	-1.5262	0.84948	0.908937	-2.75447	18.5966
356	-3441.15	3.85724	99.6	96.5	96.9	99.2	97.5	10.2	82.8	5.4	12.1	11.2	0.0283	1.1785	-1.2068	0.953138	0.89159	-2.23214	18.1596
357	-3441.18	3.84883	98.7	96.7	97.5	99.3	98	26.1	58	6.8	17.6	13.3	-0.6116	-1.5865	2.1981	0.443485	0.965273	3.67687	31.0535
358	-3441.08	3.85026	98.7	96.2	97.8	99.3	97.8	9.6	81.7	3.8	13.2	13.3	0.1839	1.3042	-1.4881	0.752852	0.971014	-2.6293	23.9401
359	-3441.23	3.87175	99.2	96	97.3	99.1	98.5	12.3	79.3	5.6	12	12.3	0.0078	1.4619	-1.4697	0.989389	0.900101	-2.74266	20.7989
360	-3441.14	3.87091	99.6	96.6	97.9	99.7	97.9	12	79.6	7.7	11.8	9.6	0.0311	1.5717	-1.6027	0.961242	0.92406	-2.97031	17.5319
361	-3441.12	3.85384	99.1	97.1	97.6	98.9	97.9	13.9	69.7	9.9	18.9	9.6	-0.2315	-1.606	1.8375	0.748042	1.03924	3.24342	20.7066
362	-3441.18	3.90285	99.1	96.7	98.2	99.4	98.5	10.8	71.6	9.9	13	13.3	-0.0899	-1.1958	1.2857	0.860153	0.84928	2.32626	17.5086
363	-3441	3.84107	99.1	96.5	97.6	99	97.7	25.1	57	6.7	22.1	12.5	-0.4918	-1.3949	1.8868	0.478655	0.93148	3.17198	22.4254
364	-3441.2	3.86562	99	96.5	97.4	99	97.9	9.3	72.3	16.9	11.5	9.9	-0.0609	-1.4634	1.5244	0.920059	0.954388	2.79703	18.4849
365	-3441.15	3.84792	98.6	96.8	97.6	99.1	97.9	14.6	64.8	3.7	25.1	14.6	0.1872	1.7488	-1.936	0.80663	0.928924	-3.46072	21.3248
366	-3441.17	3.8431	98.4	96.1	97.3	99.3	97.2	10.2	77.4	7.9	14.6	12.9	0.08	1.5643	-1.6443	0.902744	0.942219	-3.00469	19.1162
367	-3441.19	3.87766	99.2	96.6	98.2	98.8	97	11.3	75.6	10	10	10.5	-0.0638	-1.486	1.5498	0.917722	0.932758	2.84204	17.3298
368	-3441.2	3.87054	99	96.6	97.5	99.2	97.8	10.9	82	5.2	12.5	9.7	0.1505	1.4215	-1.572	0.808487	1.004	-2.81125	17.8219
369	-3441.16	3.85435	99	96.3	97.5	99.6	97.8	9.5	69.8	18	12	12.5	-0.4135	-1.0852	1.4988	0.448179	0.935732	2.50865	18.7294
370	-3441.18	3.88761	99.8	96.2	97.3	99.6	97.6	11.5	75.5	9.4	11.4	11.9	-0.006	-1.289	1.295	0.990737	0.89287	2.41758	15.9671
371	-3441.18	3.9073	99.4	96.7	97.7	99.3	98.1	11	66	15.5	13.5	11.3	0.0775	1.3285	-1.406	0.889785	0.868889	-2.56138	18.2269
372	-3441.05	3.87979	99.6	96.2	98.5	99.6	98.3	9.6	83	3.5	12.4	11.4	-0.1115	-1.5145	1.626	0.862889	0.961006	2.94367	17.9261
373	-3441.17	3.86166	99.1	96.2	98.2	100	98.2	8.7	83.4	5.8	11	11.4	-0.3568	-1.3682	1.725	0.58632	1.00426	2.95107	18.0406
374	-3441.25	3.92346	99.7	96	97.5	99.3	98.4	14.1	67.6	10.7	11.8	12.7	0.1294	1.2173	-1.3467	0.807888	0.783336	-2.40795	15.3787
375	-3441.22	3.87094	99.9	96.3	97.9	99.8	98	12.2	75.1	9.6	12.4	11	-0.161	-1.5127	1.6737	0.807625	0.934774	2.99253	18.4299
376	-3441.2	3.87064	98.8	96.3	98.4	99.7	97.9	11.3	80.6	4.9	14.6	10.1	0.0133	1.6198	-1.6332	0.983694	0.927374	-3.04348	23.7037
377	-3441.11	3.86741	99	96.4	97.8	98.8	98.3	9.6	71.5	13.1	13	11.5	-0.0668	-1.6261	1.6929	0.921033	0.936821	3.10703	20.5681
378	-3441.09	3.86419	99.8	96.4	97.7	99.1	97.3	12.5	72.4	13.2	12.2	10.8	-0.2158	-1.3419	1.5577	0.722965	0.954711	2.73525	18.0104
379	-3441.19	3.8324	98.9	96.5	97.1	98.6	98	11.1	71.3	18.5	9.7	11.9	-0.2609	-1.0428	1.3037	0.599798	1.00922	2.23562	18.427
380	-3441.17	3.88568	98.9	95.4	97.3	99.8	98.2	10.5	77.6	6.8	13	12.8	0.1288	1.382	-1.5108	0.82947	0.829489	-2.71439	15.8766
381	-3441.21	3.86639	99.8	96.7	97.7	99	97.8	10.5	77.2	12.3	10.5	10.6	-0.1427	-1.2238	1.3665	0.791095	0.956314	2.4344	21.3799
382	-3441.17	3.86836	99.1	96.3	97.9	99.2	97.7	11.4	73.3	4.1	15.8	16.2	0.1419	1.5977	-1.7396	0.836886	0.914127	-3.13075	34.092
383	-3441.13	3.89746	98.7	96.5	97.7	99.5	98.4	10.2	71	7.6	12	16.4	-0.0221	-1.2681	1.2902	0.96572	0.865658	2.39377	18.1688
384	-3441.16	3.84623	98.7	96.3	97.9	98.9	97.5	11.7	69.5	15.7	9.6	16.2	-0.3384	-1.3011	1.6395	0.587172	0.930641	2.80525	21.2545
385	-3441.17	3.85174	98.5	96.3	98	98.6	98	20.4	66.6	10.7	12.8	11.4	-0.608	-1.4816	2.0896	0.418031	0.971805	3.48336	28.5853
386	-3441.18	3.86471	98.9	96.7	97.8	99.4	97.3	9.4	86.3	3.3	12	9.9	0.122	1.4442	-1.5662	0.84423	0.981177	-2.82342	20.8968
387	-3441.2	3.89248	98.6	95.6	97.9	99.8	98.5	8.5	74.9	12.4	11.4	10.8	-0.2507	-1.3062	1.5569	0.677956	0.937821	2.70924	18.2387
388	-3441.27	3.86258	99.5	96.5	97.9	99.3	98.2	9.8	87.7	3.1	10.6	9.6	-0.161	-1.5804	1.7414	0.815134	1.00721	3.11865	18.1769
389	-3441.21	3.90118	99.6	96.1	97.5	99.3	98	11	66.5	18.6	10.8	11.1	0.0744	1.4814	-1.5558	0.904355	0.898806	-2.84412	18.9918
390	-3441.11	3.89087	99.4	96.6	97.9	98.9	98.2	12	76.3	6.8	11.9	10	0.0108	1.5647	-1.5754	0.986304	0.9208	-2.93783	16.6681
391	-3441.23	3.88612	99.3	96.7	97.6	99.9	98.2	10.5	73.4	9.4	14.2	12.2	-0.009	-1.2733	1.2823	0.985934	0.924373	2.39098	15.5605
392	-3441.19	3.87863	99.6	96.5	97.8	99.2	98	13	76.7	8.3	11.8	9.6	-0.1432	-1.3161	1.4593	0.803752	0.95333	2.60697	17.4708
393	-3441.21	3.85303	99.1	95.9	97.4	99.6	98.6	9	87.2	4.1	11.4	10.3	-0.0498	-1.4167	1.4665	0.932119	0.945456	2.69859	19.2949
394	-3441.1	3.87533	98.8	96.3	98.1	99.6	97.6	11.4	76.9	5.7	14	11.6	-0.133	-1.6013	1.7343	0.846616	0.941639	3.12815	19.6331
395	-3441.18	3.84685	99.3	96.7	97.5	98.8	98.3	18.8	65.8	7	19.1	10.7	-0.3145	-1.6083	1.9227	0.672892	0.994026	3.34256	29.5756
396	-3441.29	3.86017	98.8	96.2	97.8	99.4	97.9	8.9	77.1	6	12.9	16	-0.3394	-1.0802	1.4195	0.521857	0.916304	2.40245	16.0138
397	-3441.12	3.84651	98.8	96.3	97.6	99.4	97.8	10.5	79.4	4.9	15.3	12.1	0.0284	1.606	-1.6344	0.965274	0.90833	-3.03199	19.2957
398	-3441.17	3.87976	99.1	96.3	97.8	98.9	97.8	10.3	81.1	7	10.3	10	-0.0339	-1.6754	1.7093	0.960379	0.925253	3.16708	15.742
399	-3441.16	3.89023	99.5	96.5	97.9	99.5	98.6	11.4	80.2	4.2	11	11.9	0.1043	1.6329	-1.7372	0.87993	0.880971	-3.15749	18.6985
400	-3441.23	3.85031	99.3	96.3	98	99	97.8	15.1	70.1	9.5	17.3	11.4	-0.4617	-1.4594	1.9211	0.51933	0.941934	3.24992	24.1309
401	-3441.15	3.90339	98.8	96.2	97.6	99.7	98.2	11.4	78.3	4.1	12.9	11.6	0.0913	1.4153	-1.5066	0.878824	0.877191	-2.73763	18.8243
402	-3441.15	3.8544	98.7	96.6	97.7	99.4	97.4	8.2	79.3	10.1	10	12.8	-0.2261	-1.2142	1.4402	0.686091	1.01552	2.51027	21.6026
403	-3441.17	3.84256	99.5	96.7	97.9	99.2	98.4	20.5	60.9	12.7	17.8	11.6	-0.5076	-1.5529	2.0605	0.507309	0.970494	3.47916	21.6401
404	-3441.26	3.86761	98.5	96.6	98.1	99.4	98.7	11.7	81.8	7.8	10.9	9	-0.1597	-1.5276	1.6872	0.810714	0.972116	3.01877	16.1889
405	-3441.15	3.84156	99.6	96.7	98.1	99.6	98.2	23.6	50.4	12.7	25.3	10.9	-0.7098	-1.4399	2.1497	0.339623	0.93096	3.54984	21.0797
406	-3441.26	3.85952	99.5	96.9	97.3	100	97.5	9.8	71.5	19.3	11.8	10.3	-0.0321	-1.3246	1.3567	0.952676	0.948564	2.50912	17.8982
407	-3441.13	3.91381	100.1	96.2	97.4	99.5	98.2	13.1	69.8	4.7	13.6	15.4	0.1357	1.3813	-1.517	0.821095	0.807414	-2.72043	16.2371
408	-3441.18	3.8776	98.9	95.6	97.5	98.8	98.2	11.8	69.6	15.2	10.4	13.3	-0.2691	-1.3389	1.608	0.665269	0.870714	2.79134	20.9415
409	-3441.16	3.86489	98.7	96.7	98	99.9	98.1	8.6	82.6	5.4	12.6	12.1	-0.231	-1.5165	1.7475	0.735671	0.939303	3.07659	24.332
410	-3441.13	3.86823	99.2	96.3	97	99	98.1	12.9	60.6	20	15.2	12.3	-0.4452	-1.2917	1.7369	0.487349	0.941804	2.9239	21.6
411	-3441.15	3.87734	99.4	95.9	98.3	99.7	97.9	10.9	70.7	15.9	11.3	11.4	-0.2319	-1.4306	1.6625	0.720965	0.914546	2.91808	18.8544
412	-3441.18	3.89063	99.1	96.2	97.5	100	98	12.1	73.8	8.5	11.7	12.2	-0.5936	-1.2568	1.8503	0.358425	0.90777	3.06189	18.766
413	-3441.22	3.87779	99.5	96.1	97.5	99.6	97.8	12	78.1	7.8	12.2	10.8	-0.0207	-1.3988	1.4195	0.970798	0.914143	2.63698	16.697
414	-3441.22	3.86532	98.2	96.7	97.1	99.4	97.9	10.1	62.4	27	11.3	11.6	-0.1138	-1.1452	1.259	0.819208	0.946905	2.25677	21.2411
415	-3441.21	3.86272	99.3	96.4	97.3	98.7	98.1	10.7	74.4	15	9.8	10.8	-0.2123	-1.6353	1.8476	0.770188	0.940733	3.27663	21.7925
416	-3441.17	3.87529	99.4	96.7	97.8	99.8	98.5	11.1	68.9	11.9	11.3	16.6	0.071	1.3384	-1.4095	0.899213	0.941382	-2.57343	16.5322
417	-3441.16	3.86338	98.7	96.2	97.3	98.6	97.4	14.5	78.6	4.4	11.3	13.2	-0.0098	-1.4063	1.4161	0.986123	0.878612	2.64057	18.6741
418	-3441.18	3.87347	98.7	96.1	97.5	99.6	98.6	9.9	84.7	4.5	10.6	10.8	-0.1431	-1.3305	1.4736	0.805729	0.95089	2.63363	21.5654
419	-3441.24	3.90963	99	96.7	97.8	99.1	98.2	13.5	69.2	10	14.2	10.9	-0.2021	-1.6777	1.8798	0.784997	0.909743	3.34442	17.472
420	-3441.09	3.85665	98.6	96.2	97.5	99.7	98	9.5	83.5	3.9	11.8	12.4	-0.1644	-1.4779	1.6423	0.799809	0.941096	2.93134	21.5086
421	-3441.25	3.85332	99.7	96.4	97.3	99.5	97.4	10.9	79.6	8	10.7	12.6	-0.0663	-1.3631	1.4294	0.90728	0.928381	2.61473	18.5408
422	-3441.09	3.85602	98.8	97.1	97.3	100	98.5	12.6	75.3	8.9	11	14.5	0.1549	1.3994	-1.5543	0.800683	0.953157	-2.77472	19.8911
423	-3441.15	3.85345	99.1	97.1	98	99.1	98.4	17.5	62.5	15.1	16.5	9.6	-0.4974	-1.5264	2.0239	0.508431	1.05613	3.41793	21.3492
424	-3441.17	3.86503	99	96.4	97.3	98.6	98	11.1	79.7	7.1	10.7	13.5	-0.2173	-1.3336	1.5509	0.719819	0.917467	2.72157	8.57965
425	-3441.12	3.86668	98.6	96.6	97.8	99.9	98	17.2	63.2	16.2	14.8	10.3	-0.2417	-1.7771	2.0188	0.760523	0.931781	3.57286	22.0271
426	-3441.15	3.85667	99.4	95.8	97	98.6	98.3	12.2	72.4	13.1	9.8	14.8	-0.523	-1.1004	1.6234	0.355666	0.842195	2.68546	16.714
427	-3441.19	3.88909	99.1	97	98	99.8	97.9	10.1	73.7	12.2	10.7	11.6	-0.2209	-1.4	1.6209	0.727484	0.949982	2.84887	16.6652
428	-3441.14	3.82441	99	96.4	97.5	99.3	97.8	22.8	48.3	11.5	29.9	10.7	-0.7753	-1.3486	2.1239	0.269947	0.969086	3.48322	29.9907
429	-3441.17	3.8812	99.3	96.8	97.8	99.1	97.6	12.5	79.2	6.2	10.3	10.8	0.0363	1.4854	-1.5217	0.952279	0.962281	-2.81398	17.8861
430	-3441.22	3.8723	99	96.6	98.2	99.2	98.2	9.4	85	3.6	11.8	10.2	-0.113	-1.4743	1.5873	0.857661	0.977322	2.87023	18.667
431	-3441.19	3.82478	98.6	96.2	97.4	99.3	98.5	29.1	53.1	8.6	19.9	11.9	-0.7564	-1.3855	2.1419	0.293724	0.986552	3.52046	68.1665
432	-3441.25	3.88408	98.9	96.2	97.7	99.2	97.6	9.3	74.3	7.3	12.1	15.8	-0.144	-1.4512	1.5952	0.819473	0.907646	2.85967	17.5597
433	-3441.18	3.84138	98.1	96.8	97.8	98.9	97.9	21.4	61.7	7.9	21	9.5	-0.4902	-1.3483	1.8385	0.466746	1.01118	3.08553	18.0387
434	-3441.14	3.87987	99.3	96.2	97.6	99.2	98	14.5	68.9	11.2	11.5	13.3	-0.4314	-1.1863	1.6177	0.466702	0.857894	2.7149	18.4272
435	-3441.21	3.84859	99.5	97.5	97.2	98.7	97.6	29.7	10.5	42.1	29.8	10.6	-0.9735	-1.3703	2.3437	0.169306	0.974924	3.81597	42.2009
436	-3441.16	3.84547	99.3	96.8	97.8	98.8	98.2	13.9	66.5	16.2	15	11.3	-0.3492	-1.2284	1.5777	0.557261	0.979594	2.6856	24.252
437	-3441.15	3.84915	99.1	96.1	97.8	99.6	97.6	13.3	78.1	3.4	15.6	11.2	-0.0257	-1.5505	1.5762	0.967359	1.01336	2.92552	21.6515
438	-3441.25	3.87331	99	96.2	97	99.4	97.5	12.7	77.2	8.2	13.5	10	0.1693	1.51	-1.6793	0.798422	0.874166	-2.99643	16.2715
439	-3441.19	3.85502	100.2	95.9	97.8	99.8	97.7	10.2	81.5	3.9	11.6	13.1	0.0451	1.5075	-1.5526	0.941872	0.900634	-2.8638	18.6178
440	-3441.25	3.87854	99.2	96.4	97.6	99.5	97.9	10.9	72.6	14	11	11.1	-0.0493	-1.4569	1.5062	0.934569	0.895733	2.77337	19.0021
441	-3441.17	3.88748	99.6	96.2	97.4	99.7	98.1	11	80	4.9	12	12	-0.1445	-1.4404	1.5849	0.817668	0.852172	2.84007	21.7491
442	-3441.06	3.86424	99.8	96.4	97.4	98.9	98.2	11.6	83.3	6.3	10.1	9.8	-0.1125	-1.5493	1.6618	0.864638	0.974728	3.00969	18.8375
443	-3441.18	3.87153	99.8	96.3	97.6	99.6	97.8	11.5	81.2	8.4	10.4	10.1	0.0798	1.453	-1.5328	0.895895	0.923492	-2.79647	18.878
444	-3441.12	3.8658	98.7	95.9	97.3	99.3	98	10.8	77	8.4	10	15.6	-0.7019	-0.9691	1.671	0.159903	0.844406	2.71931	14.6324
445	-3441.19	3.88752	99.3	96.4	97.8	99.4	98.1	10.7	67.4	11.5	11.5	18.6	-0.0991	-1.5199	1.619	0.877524	0.90737	2.94103	17.356
446	-3441.12	3.87894	99.1	96.5	98.1	99.4	98.4	10.7	72	9.7	14.6	12.4	-0.3791	-1.3596	1.7387	0.563922	0.968105	2.96298	18.5364
447	-3441.16	3.83729	99.1	97	97.3	99	98.3	15	68.4	15	13.2	11	-0.5428	-1.235	1.7778	0.389331	0.995588	2.95275	26.7914
448	-3441.23	3.86371	99.8	96.3	97.8	99	98	11.6	74.7	13.4	11.2	10.1	-0.1844	-1.7041	1.8885	0.804729	0.950397	3.37432	24.5588
449	-3441.25	3.87379	99	96.5	97.4	99.7	98	9.4	75.5	13.6	11.3	10.4	0.0341	1.2554	-1.2895	0.947106	0.948416	-2.38156	18.3917
450	-3441.14	3.85702	98.6	96.6	97.6	99.7	97.9	16.9	62.6	10	16.9	16.1	-0.4273	-1.2041	1.6314	0.476136	0.940951	2.74173	17.9904
451	-3441.15	3.85871	98.9	96.5	98	99	98.6	18.6	72.3	7	12.5	10.2	-0.4818	-1.2614	1.7432	0.447234	0.967086	2.91745	18.5843
452	-3441.15	3.84966	99.1	96.4	98.1	100	97.9	8.4	77	14.7	12.3	10	-0.2366	-0.9962	1.2328	0.616194	0.947036	2.12026	19.7778
453	-3441.21	3.88321	99.4	96	97.6	99.4	98.1	12	77.2	5.9	12.8	12.6	-0.0985	-1.4032	1.5017	0.868779	0.905646	2.72244	17.7803
454	-3441.11	3.85735	99.4	95.9	97.2	99.3	97.9	19.7	63.1	5.8	20.3	12.6	-0.3771	-1.3089	1.6861	0.55263	0.941206	2.86787	20.2315
455	-3441.14	3.88652	99.7	95.8	97.8	98.6	97.9	13.3	66.7	14.3	13.9	12	-0.237	-1.4294	1.6663	0.715585	0.841659	2.92159	19.2564
456	-3441.11	3.84596	98.2	96.8	97.8	99.1	97.5	9.4	79.5	5.2	11.4	15.2	-0.213	-1.3859	1.5989	0.733613	0.953012	2.81374	21.3825
457	-3441.15	3.84984	99.2	96.6	97.7	99.2	97.9	11.2	73.9	11.3	14.5	12	0.0479	1.4772	-1.5251	0.937223	0.914184	-2.80992	21.3916
458	-3441.02	3.87926	99	96.8	97.4	99.2	98	14.8	64.9	14.7	15.8	9.7	-0.1863	-1.5903	1.7765	0.790295	0.957183	3.16429	21.0198
459	-3441.21	3.83342	99.1	96.6	97.7	98.7	97.9	24.8	53.1	6.3	25.4	13.1	-0.2946	-1.5895	1.8841	0.687248	0.96701	3.28469	27.0775
460	-3441.2	3.92465	99.3	96.2	97.8	99.7	98.2	10.4	74.7	5.8	13.3	10.5	0.1598	1.6643	-1.8241	0.824823	0.861845	-3.27394	17.0272
461	-3441.16	3.83142	98.7	96.1	96.7	99.4	97.5	20.1	56.6	13.6	21.2	11.8	-0.6294	-1.2948	1.9242	0.345824	0.945831	3.17968	25.0212
462	-3441.17	3.84344	98.9	96.3	97.4	99.9	97.5	11.4	73.5	8.7	11.9	17.5	-0.2274	-1.199	1.4264	0.681108	0.959126	2.48377	18.379
463	-3441.13	3.83742	99.4	96.7	97.7	98.8	98.5	28.7	49.2	7.2	26	11.4	-0.7791	-1.3612	2.1403	0.271939	1.01133	3.51072	22.7558
464	-3441.18	3.86954	98.9	96.5	97.8	100.4	97.8	10.6	79.1	8.1	13.1	9.1	-0.1358	-1.2911	1.4268	0.8097	0.998934	2.55227	15.7824
465	-3441.22	3.86634	98.5	96.6	97.9	99.2	98.1	23.9	61.9	8	17.4	9.3	-0.5788	-1.5546	2.1333	0.457401	0.95618	3.57546	21.5262
466	-3441.11	3.85763	98.8	96.2	97.8	99.5	98.3	12.1	76.2	7.5	13.3	11.6	-0.2492	-1.5605	1.8097	0.724589	0.955581	3.17877	27.1502
467	-3441.16	3.89118	99.8	96.3	97.8	99.5	98.1	10.7	81.6	4.4	11.4	10.6	0.01	1.628	-1.638	0.987763	0.933863	-3.05557	19.4879
468	-3441.13	3.8963	99.4	96.6	98	99.7	98.2	10.3	81.9	4	11.2	10.2	0.0261	1.5216	-1.5477	0.966271	0.932153	-2.87176	15.5492
469	-3441.16	3.85791	98.1	96.1	97.9	98.5	97.9	10.1	70.1	14	11	15.1	-0.2862	-1.42	1.7062	0.664509	0.913333	2.96127	22.157
470	-3441.21	3.84337	99.5	96.5	97.2	98.9	98.2	13.3	77.9	7.7	11.3	11.7	-0.4176	-1.3796	1.7972	0.535278	0.989478	3.04819	21.5085
471	-3441.14	3.86736	99.4	96.1	97.4	99.5	97.9	9.1	71.7	17.4	12.5	11.8	-0.0404	-1.3906	1.4311	0.943472	0.940986	2.64069	24.0772
472	-3441.13	3.88897	99	96	97.5	99.2	98.1	11	76.4	8.5	10.6	11.4	-0.0893	-1.3421	1.4314	0.875251	0.898417	2.59882	17.7515
473	-3441.16	3.84762	98.5	96.6	97.6	99.1	97.7	15.7	73.2	9	12.9	12.1	-0.2896	-1.4431	1.7327	0.665743	0.94559	3.00806	19.1018
474	-3441.07	3.86485	99.8	96.2	98.5	99.4	97.9	9.9	86.9	3.9	10.3	9.2	-0.1843	-1.5825	1.7668	0.791352	0.988267	3.14769	21.9569
475	-3441.19	3.84548	98.7	96.3	97.7	98.3	98.4	16.5	65.6	6	21	12.3	-0.2067	-1.6072	1.8139	0.772105	0.911812	3.21815	18.6876
476	-3441.16	3.8582	99.4	96.2	97.8	99.2	97.5	12.4	76.6	10.8	10.7	11.9	-0.2846	-1.3396	1.6242	0.649541	0.928461	2.81083	19.3334
477	-3441.21	3.92672	99.3	97	97.9	100	97.7	11.3	67.9	12.2	12.5	12.5	0.3255	1.254	-1.5795	0.587865	0.832153	-2.70291	17.2077
478	-3441.15	3.84342	98.8	96.9	97.9	98.9	97.4	14.8	56.2	26.9	15.5	8.8	-0.217	-1.5507	1.7677	0.754482	0.971951	3.12447	23.3881
479	-3441.19	3.88485	99	96.1	97.9	99.5	97.7	11.5	73.8	10.7	11.7	12.8	0.1134	1.3047	-1.4181	0.840063	0.860758	-2.55406	18.6765
480	-3441.05	3.88785	99	96.1	97.2	99.4	98	10.6	68.8	15.5	12.7	11.5	-0.0744	-1.1372	1.2116	0.877248	0.86828	2.20079	18.9998
481	-3441.22	3.90033	99.1	96.7	97.2	99.4	98	11.9	63.2	18.4	11.1	13.1	-0.1239	-1.4357	1.5596	0.84107	0.862594	2.80953	17.2255
482	-3441.24	3.87818	99.3	96.2	97.5	99.6	98.4	10.6	73.7	12.5	12.4	11.9	0.0087	1.0307	-1.0395	0.983187	0.869189	-1.93689	18.5445
483	-3441.22	3.86466	98.9	96.4	97.8	99.1	98.4	12.9	78.8	6.4	12.4	10.8	-0.5404	-1.3912	1.9316	0.440464	0.93221	3.2296	18.8695
484	-3441.18	3.88101	99.3	96.1	97.3	99.4	98	10.9	71.2	12.8	12.6	14.1	-0.2185	-1.212	1.4305	0.694568	0.790475	2.4974	17.3005
485	-3441.18	3.80684	98	97	97.1	98.5	98.5	45.5	7.2	17.9	42.3	12.4	-1.1154	-1.433	2.5483	0.124629	0.961468	4.14008	39.3887
486	-3441.14	3.84946	99.7	96.3	98	99.2	98	9.7	82.9	3.6	11.9	13.9	-0.0269	-1.4985	1.5253	0.964789	0.979898	2.8293	18.6616
487	-3441.18	3.86933	98.4	97.2	98	99.1	97.5	8.3	80.4	7.3	11.8	12.1	-0.0651	-1.2368	1.3018	0.900044	0.984559	2.37737	18.0565
488	-3441.2	3.88604	99.2	96.1	97.9	99.8	98.3	9.3	73.7	14.4	10.8	11.7	-0.418	-1.4709	1.8889	0.557458	0.947806	3.21548	19.9944
489	-3441.22	3.87366	99.4	95.9	98	99.1	97.9	10.6	83.6	4.9	10.5	10	-0.1234	-1.5776	1.701	0.85492	0.982975	3.0738	19.6961
490	-3441.2	3.85713	99.2	96.6	97.3	99.6	97.4	10	80.4	6.8	13.5	12.3	-0.0842	-1.2553	1.3395	0.874258	0.888183	2.43152	14.3899
491	-3441.19	3.84886	98.5	96.5	97.3	99.1	98	26.2	58.8	3.6	22.9	11.1	-0.1766	-1.9244	2.101	0.831913	0.976545	3.77686	20.6474
492	-3441.19	3.89296	99.5	96.4	97.7	99.3	98.3	9.6	85.5	4.1	10.5	9.4	-0.0015	-1.6257	1.6273	0.998118	0.971789	3.04342	18.6367
493	-3441.17	3.8581	99.3	96.4	97.8	99.4	98	11.7	74.4	6.3	14.6	14.4	0.0999	1.609	-1.7089	0.8831	0.931775	-3.10834	19.2477
494	-3441.22	3.85624	98.9	96.7	97.9	99.2	97.8	12.7	82.1	5.5	12.7	10.5	0.0175	1.5039	-1.5214	0.977013	0.929596	-2.83054	18.2851
495	-3441.07	3.83727	99.1	96.5	97.3	98.6	97.9	24.4	54.5	6.7	22.5	15.4	-0.4366	-1.5792	2.0157	0.566842	0.966556	3.43686	21.0798
496	-3441.17	3.88117	99.3	95.9	97.8	99.5	98.1	10.7	66.7	19.5	11.8	11.4	-0.0619	-1.4349	1.4967	0.91732	0.934347	2.74455	18.8552
497	-3441.17	3.84635	99.1	97	97.6	98.9	98.1	16.6	68.6	7.5	13.5	16.6	0.1184	1.505	-1.6235	0.854079	0.973194	-2.93316	19.5173
498	-3441.17	3.84931	99.2	96.8	97.3	99.4	98	15.3	67.7	8.1	20	10.4	-0.32	-1.4489	1.7689	0.638234	0.972478	3.05479	24.5581
499	-3441.16	3.85876	99	96.6	97.9	99.3	97.8	15	75	8.8	12.5	9.3	-0.0894	-1.549	1.6384	0.890861	0.971725	2.98549	18.3632
500	-3441.13	3.86698	99.5	96.2	98	99.7	98.2	9.7	81.5	8.1	11.4	10.1	0.053	1.5057	-1.5587	0.931985	0.984684	-2.86832	18.642
501	-3441.08	3.87446	99.3	95.4	97.8	99.1	97.9	9.3	85.6	3.3	10.5	10.3	-0.2148	-1.4993	1.7141	0.749385	0.974538	3.02644	21.3566
502	-3441.21	3.9097	98.6	97	97.4	99.8	97.5	11.1	69.2	6	13.3	17.9	0.1621	1.3918	-1.5539	0.791366	0.873393	-2.76842	17.1488
503	-3441.18	3.87698	99.4	97	97.8	98.9	97.8	9.3	68.5	19.9	11.7	9	-0.1512	-1.6451	1.7963	0.831653	0.987668	3.22893	21.607
504	-3441.18	3.85909	99.2	96.2	97.8	99	98.2	17	62.9	12.7	18.1	11.7	-0.3629	-1.5425	1.9053	0.619112	0.939318	3.27882	21.6359
505	-3441.2	3.86839	98.5	96	97.7	99.4	97.5	13.7	73.1	4.1	16.2	13.5	0.0295	1.5762	-1.6057	0.963288	0.886465	-2.97726	27.6912
506	-3441.19	3.85886	98.8	96.2	97.8	99.4	98.6	12.2	78.8	5.2	14.7	9.5	0.183	1.5771	-1.7602	0.792047	0.909138	-3.13633	24.4336
507	-3441.3	3.86019	98.9	96.7	97.5	99.3	97.8	19.1	66	8.6	17.6	10.9	-0.4814	-1.3534	1.8348	0.475259	0.986082	3.08317	20.184
508	-3441.17	3.87587	99.2	96.7	98.3	99.1	98.2	10	79.9	9	10.5	9	-0.3737	-1.3369	1.7106	0.563108	1.00264	2.9147	18.6058
509	-3441.2	3.86388	99.1	96.4	97.3	99	97.9	13.1	75.7	9.4	12.2	10.7	-0.3136	-1.3376	1.6511	0.620179	0.978389	2.84192	18.6088
510	-3441.16	3.85169	100.1	96.3	97.5	99.2	97.5	12.8	82.6	4.6	10.3	11.8	0.022	1.3097	-1.3317	0.966898	0.927285	-2.47147	20.7395
511	-3441.19	3.87372	98.9	96.5	97.7	99.7	97.4	10.3	74.4	8.7	16.2	11	0.1017	1.6255	-1.7271	0.882261	0.886545	-3.14088	30.0166
512	-3441.16	3.85508	99.1	97.4	98	99.3	97.6	16.6	58.9	16.7	13.5	16	-0.3599	-1.4463	1.8062	0.601487	1.03224	3.0984	21.1399
513	-3441.19	3.85622	98.9	96.1	97.5	98.9	98.3	21	73.6	2.9	13.4	10.5	-0.0836	-1.6652	1.7487	0.90444	0.990308	3.19679	16.6596
514	-3441.15	3.88273	99.4	96.2	97.3	100.4	98.1	8.8	74.6	10	14.5	11	-0.0023	-1.7733	1.7757	0.997383	0.896837	3.32035	18.5789
515	-3441.1	3.88107	99	96.3	98	99.4	98.1	9.4	77.4	7	13.6	12.3	-0.3211	-1.4436	1.7647	0.636109	0.931365	3.04635	18.3739
516	-3441.13	3.84083	98.8	96.2	97.5	99.4	97.7	12.9	73.1	10.4	13.1	12.3	-0.4854	-1.1228	1.6082	0.396358	0.932504	2.67331	21.4242
517	-3441.19	3.85967	99.1	96.1	97.4	99.2	98.2	11.2	84.3	3.5	12.4	9.6	-0.1147	-1.6141	1.7287	0.867348	0.993891	3.1329	19.8713
518	-3441.18	3.87924	98.5	96.5	98.2	99.9	98.3	19.9	59.5	10.2	16.5	14.8	-0.504	-1.4111	1.9151	0.473621	0.955141	3.21725	21.1599
519	-3441.21	3.85085	98.8	96.9	97.9	99	98.1	23.3	56.2	10.1	23.5	9	-0.4484	-1.7266	2.175	0.587676	1.01536	3.7218	30.9776
520	-3441.04	3.8587	98.5	96.5	97.9	99.1	98.2	20.1	69.7	4.8	14.8	10.6	-0.2734	-1.5063	1.7797	0.692792	0.971748	3.10608	21.3473
521	-3441.22	3.86358	98.7	96.2	97.8	99.7	98.1	11.3	78.2	5.3	14.3	11.8	-0.0163	-1.5469	1.5632	0.979104	0.905632	2.90989	21.7955
522	-3441.22	3.87571	99.8	96.8	97.5	99.2	98.3	10.3	82.3	4.8	11.5	11.1	-0.0066	-1.3356	1.3422	0.990207	0.92993	2.50526	18.2897
523	-3441.22	3.90141	99.2	96.2	97.7	99.5	97.8	11.4	76.4	5.6	12	12.3	-0.0072	-1.6211	1.6283	0.991157	0.921786	3.04011	21.0888
524	-3441.23	3.87223	98.4	96.1	97.5	99.7	98.2	9.6	75.3	10.3	12.9	13.5	-0.2831	-1.3471	1.6303	0.652643	0.895091	2.82308	16.686
525	-3441.2	3.89396	99.2	96.6	97.4	99.6	98.2	8.8	76.5	8.3	11.4	13.2	-0.2827	-1.1275	1.4101	0.599109	0.898823	2.41786	18.131
526	-3441.1	3.88777	99.1	97.1	98.2	99.2	98.2	19.8	53.4	15.4	17.8	11.3	-0.6731	-1.4255	2.0985	0.35852	0.943589	3.47265	18.3645
527	-3441.21	3.84937	99.3	96.9	97.3	99.1	97.4	14	51.1	25.9	18.7	14	-0.4799	-1.5019	1.9818	0.515655	0.966644	3.35075	21.0036
528	-3441.16	3.88122	100.1	97.2	97.7	98.7	97.8	11.2	67.7	19.8	11.1	10.3	-0.0835	-1.4946	1.5781	0.894214	0.934825	2.87788	21.872
529	-3441.2	3.85503	98.3	96.8	97.7	99.2	97.7	9.4	80.2	7.4	12.1	12.1	0.0294	1.3214	-1.3508	0.956519	0.940752	-2.50042	18.228
530	-3441.3	3.82693	98.8	96.5	97.7	99	98.3	31.9	41.4	4.2	33.5	12.8	-0.613	-1.5876	2.2006	0.442849	0.957888	3.68068	33.1867
531	-3441.13	3.85666	98.4	97	97.9	99.3	98.3	29.7	39.9	15	26.8	9.4	-0.6637	-1.7897	2.4533	0.45897	1.02645	4.1127	28.7275
532	-3441.16	3.86385	99.1	96.2	97.4	99.1	98.3	11.5	75	11.3	9.6	13.6	-0.3374	-1.3231	1.6605	0.593634	0.878514	2.84432	18.4791
533	-3441.1	3.86959	98.7	96.2	97.8	99.5	98.5	11.1	77.8	9.6	10.2	11.3	-0.1377	-1.4013	1.539	0.821055	0.967746	2.7598	21.3188
534	-3441.23	3.82665	99.2	97.1	96.7	98.3	98.6	43	3.4	29	38.4	10.8	-1.06	-1.7143	2.7742	0.235858	1.00103	4.53701	36.3344
535	-3441.19	3.8779	99.2	96.6	97.2	99.8	97.9	10.9	69	19	10.9	10.1	0.0587	1.1544	-1.2131	0.903263	0.889144	-2.21699	21.8602
536	-3441.17	3.8558	99	96.4	97.5	99.5	98.6	20.1	66.1	6.8	17.4	11.7	-0.5866	-1.6189	2.2055	0.468092	0.914748	3.70212	86.2947
537	-3441.17	3.84999	99.1	96.1	97.1	99.1	97.8	11	75.5	11	14.9	11	-0.0126	-1.0735	1.0861	0.976873	0.900181	2.02052	18.5536
538	-3441.24	3.84396	98.9	96.5	97.9	99.2	99	23.2	51.4	12.3	24.9	10.9	-0.7644	-1.3383	2.1027	0.272956	0.969662	3.44939	26.8612
539	-3441.19	3.86709	99.3	96.1	97.3	99.1	98.2	15.9	68.1	9.2	15.1	11.5	-0.2797	-1.4221	1.7019	0.671276	0.929579	2.95765	18.316
540	-3441.11	3.85303	99.2	96.2	97.9	100.1	97.7	13.3	74.2	4.2	13.2	16.7	-0.1568	-1.6344	1.7912	0.824892	0.878286	3.215	18.1646
541	-3441.14	3.84826	99.3	96.4	97.6	99.7	98.2	17.5	73.5	4.7	15.8	10.4	-0.0804	-1.7287	1.8091	0.911076	0.9117	3.31245	18.6764
542	-3441.22	3.87919	99.3	96.6	98.1	99.3	97.7	10	81	4.3	10.6	14	-0.116	-1.5889	1.705	0.863891	0.907342	3.08738	24.4748
543	-3441.23	3.88499	98.9	96.3	97.7	99.6	98.3	9.5	80.4	5.4	11.8	12.5	-0.2647	-1.4253	1.6899	0.686762	0.917823	2.94585	17.9103
544	-3441.16	3.86982	99.3	96.9	97.2	98.8	97.6	13.6	73.4	11.6	11.4	11.3	0.1804	1.2076	-1.388	0.740071	0.881889	-2.44583	18.2831
545	-3441.25	3.88108	98.9	96.6	97.5	99.1	98.4	9.6	80.7	5.5	13.9	10.2	-0.1067	-1.5112	1.6179	0.868056	0.96491	2.93258	21.6811
546	-3441.25	3.86747	99.7	97	98.2	98.9	98	10	82.5	7.4	9.8	11.4	-0.0081	-1.5149	1.523	0.989384	1.01205	2.84218	18.6388
547	-3441.16	3.90233	99.2	96.6	97.7	99.5	97.7	12.3	60.7	17.6	14.3	12.1	-0.2881	-1.4814	1.7695	0.67432	0.867191	3.07702	20.4238
548	-3441.18	3.86302	99.5	96.7	98.1	99.2	97.8	9.1	79	9	11.9	11.2	-0.2635	-1.6042	1.8677	0.717819	0.980282	3.27613	17.7457
549	-3441.18	3.8654	99.1	95.7	98	98.7	98	9.3	79.3	6.9	12	13.4	-0.3631	-1.3476	1.7107	0.575544	0.9073	2.92112	21.4737
550	-3441.19	3.87204	98.6	96.8	98.1	98.9	98	12.6	77.6	3.8	14	11.6	-0.0001	-1.7042	1.7043	0.999868	1.00026	3.18885	19.1441
551	-3441.18	3.8598	99.4	96.7	97.1	98.9	98.5	9.3	73.4	17.6	10.2	11.4	-0.2648	-1.4051	1.6699	0.682877	0.965093	2.90864	21.5579
552	-3441.24	3.89181	99	96.5	97.8	98.8	97.7	12.6	74.8	9.6	13.4	8.9	0.0613	1.596	-1.6573	0.926037	0.937074	-3.04523	18.2126
553	-3441.21	3.87405	99.4	96.4	97.5	99.2	97.8	10.2	80.2	7.4	9.7	12.2	-0.3517	-1.4948	1.8465	0.619049	0.912817	3.17754	14.9324
554	-3441.1	3.87994	99.4	96.6	97.8	99.6	98.2	10.5	68	15.7	13.9	10.9	-0.3539	-1.286	1.6399	0.568382	0.957072	2.79678	18.4767
555	-3441.1	3.87788	99.6	96	97.8	99.1	97.8	14.1	68	15.3	11.4	11.5	0.2072	1.3543	-1.5615	0.734619	0.869391	-2.74851	18.3493
556	-3441.13	3.8886	99.1	96.6	97.8	99.5	98.5	11.2	74.7	10.6	11.1	11.5	-0.1096	-1.5761	1.6857	0.869938	0.939217	3.05684	19.3748
557	-3441.19	3.86196	99.2	96.4	98	99	97.7	10.2	79.4	2.8	10.1	17.7	-0.2191	-1.5606	1.7797	0.753765	0.954321	3.14519	18.6013
558	-3441.16	3.85366	99.2	97	97.3	99.4	97.9	9.8	77.2	4.4	12.3	18.1	-0.0423	-1.2173	1.2596	0.932815	0.933336	2.31831	18.1216
559	-3441.11	3.86849	98.5	96.7	97.8	99.1	97.6	13.6	77.8	7	12.7	10.2	0.0643	1.5627	-1.627	0.920907	0.941546	-2.98602	18.7539
560	-3441.14	3.87718	99.4	96.3	97.9	99.5	97.6	10.1	76.1	12	12.1	9.1	0.0681	1.37	-1.4381	0.905269	0.948526	-2.62956	18.0578
561	-3441.21	3.85442	99.7	96	97.6	99.2	97.6	11.1	78.4	3.7	9.8	17.3	-0.0538	-1.5073	1.561	0.9311	0.908689	2.87194	18.1578
562	-3441.26	3.86306	98.6	96.3	97.7	99.3	97.7	16	64.1	4.7	15.8	19.8	-0.0926	-1.5986	1.6912	0.890457	0.8675	3.08153	21.0906
563	-3441.2	3.8361	99	96.5	97.4	98.8	97.6	22.4	66.7	7.1	17	10.3	-0.3483	-1.5047	1.853	0.624046	0.957662	3.19167	18.6209
564	-3441.21	3.85411	99.4	97.1	97.3	99.4	97.9	20.2	58.1	13	18.7	11.9	-0.5053	-1.399	1.9043	0.469282	0.961663	3.19705	21.3252
565	-3441.22	3.87433	99.1	96.6	97.4	99.5	97.4	10.3	70.5	15.5	12.4	11.9	0.0277	1.5426	-1.5703	0.964688	0.918793	-2.91273	19.5309
566	-3441.17	3.81944	98.8	97.6	97	99.2	98.5	41.8	19	11.6	41.7	11.5	-1.1439	-1.4622	2.6061	0.122125	1.03489	4.23355	35.6455
567	-3441.17	3.87363	99.5	96.4	97.9	99.1	97.9	10.9	78.4	9.2	10.6	11.5	-0.1743	-1.3151	1.4894	0.765922	0.948465	2.63895	17.3535
568	-3441.24	3.85726	99	96	97.1	99.1	98.6	9.7	83.7	4.7	11	12.4	-0.3715	-1.2375	1.609	0.538216	0.973373	2.73024	17.314
569	-3441.15	3.82952	98.9	96.1	97.4	98.8	98	26	62.1	4.6	18.1	11.7	-0.2903	-1.6644	1.9547	0.702979	1.01965	3.41847	24.0758
570	-3441.21	3.89267	99.4	96.2	97.8	99.3	98.2	12.6	61	22	12.4	10.8	0.0063	1.6288	-1.6351	0.992298	0.906923	-3.0536	18.7412
571	-3441.23	3.86266	98.8	96.9	98	99	97.7	16.7	66.7	10.1	17.8	10.4	-0.4592	-1.3416	1.8008	0.490001	0.921503	3.03265	17.4325
572	-3441.23	3.86783	99.8	96.4	97.7	99.6	97.9	9.4	88.1	3.2	10.1	10	-0.177	-1.5319	1.709	0.792837	0.996676	3.04562	21.1429
573	-3441.14	3.87677	99.3	95.9	97.3	99.1	97.8	11.6	77.9	8.2	10.7	11.8	-0.2486	-1.4995	1.7481	0.715569	0.906826	3.06494	19.6558
574	-3441.16	3.84467	99.5	96.6	97.3	99.2	97.4	12.9	64.7	11.8	15.8	16	-0.4069	-1.3901	1.797	0.547104	0.956449	3.05373	21.1458
575	-3441.13	3.839	98.6	96.4	97.6	99.1	97.7	15.8	64.8	7.3	22.9	12.4	-0.3507	-1.5715	1.9222	0.635148	0.934508	3.31766	21.6584
576	-3441.16	3.84619	98.8	96.6	97.5	99.5	97.7	20.2	64.4	11.9	15.1	9.8	-0.3315	-1.6727	2.0042	0.669218	0.987885	3.48165	21.2109
577	-3441.09	3.87323	99.2	96.8	98.2	98.8	98.2	10.1	66.9	17.8	13.8	10	-0.3087	-1.5811	1.8898	0.67327	1.01452	3.28563	29.1252
578	-3441.05	3.88357	99.1	96.6	97.8	99.7	98.2	8.8	83.1	5.1	11.3	10.5	-0.0691	-1.3392	1.4082	0.901919	0.958303	2.57285	19.1264
579	-3441.24	3.81475	98.7	96.9	97	99.3	98.2	33.4	49	3.8	26.3	12.3	-0.4309	-1.8092	2.2401	0.615294	0.994891	3.85214	35.2779
580	-3441.21	3.87682	99.9	96.7	97.6	99.2	97.5	14.1	76.7	3.5	15.9	10	0.2271	1.544	-1.7711	0.743539	0.931208	-3.12322	22.0611
581	-3441.25	3.85496	99.3	96.5	97.1	99.7	98.1	11.4	68.5	18.4	10.5	12.7	-0.1278	-1.3774	1.5052	0.830223	0.928854	2.70475	18.3705
582	-3441.19	3.89209	99.5	96.6	98.1	99.4	98.1	13.5	75.8	7.9	10.8	11.5	0.0549	1.6247	-1.6797	0.934577	0.920791	-3.09276	18.5411
583	-3441.17	3.87328	98.7	96.2	98.4	99.7	97.8	10.1	72.7	11.9	11.8	12.1	-0.0353	-1.5747	1.61	0.956153	0.941832	2.98011	16.521
584	-3441.19	3.86876	99.1	97.1	98.1	99.1	98.1	10.3	81.4	3.8	11.3	12.6	-0.1343	-1.6086	1.7428	0.845933	1.00515	3.14299	18.9164
585	-3441.11	3.92752	99.2	96.5	98	99.6	98.9	10.6	73.3	9	11.4	11.7	-0.1909	-1.2132	1.4041	0.728067	0.898963	2.46815	16.0261
586	-3441.2	3.85442	99.6	96.3	97.7	99.4	98.8	14.8	72.3	8	16.7	10.7	-0.3507	-1.436	1.7867	0.607451	0.997294	3.06817	21.2497
587	-3441.15	3.86607	100	96	97.4	99.2	98.3	11.5	74.1	11.1	13.2	12.3	-0.3191	-1.2491	1.5682	0.59303	0.89408	2.68594	18.3905
588	-3441.1	3.86835	99.7	97	97.2	99.5	97.3	12.3	30.1	50.1	11.4	16.7	0.1056	1.521	-1.6266	0.870127	0.948937	-2.94971	100.302
589	-3441.1	3.88455	99.9	96.7	98.3	99.1	98.5	17.3	71.3	7.6	11.5	10.1	-0.4168	-1.3435	1.7603	0.526484	1.00561	2.98132	18.1879
590	-3441.13	3.85824	98.8	97.1	97.7	98.5	98.8	21.5	50.8	10.6	23.1	13.3	-0.4069	-1.5592	1.9661	0.586066	0.949558	3.36343	21.9976
591	-3441.14	3.89636	99.2	96.4	97.5	100.5	97.9	9.5	73.2	12.3	12.8	11.4	0.101	1.3041	-1.4051	0.85622	0.897563	-2.53987	17.5027
592	-3441.18	3.86242	99	96.7	97.9	99.1	97.9	9.2	85.9	4.9	10.2	11	-0.1426	-1.5531	1.6957	0.831764	0.990345	3.04822	15.8172
593	-3441.18	3.85774	99.1	96.4	97.4	99	97.7	11.3	73	12.8	9.4	14	-0.2298	-1.2073	1.4371	0.680146	0.936981	2.5019	18.2478
594	-3441.15	3.87548	98.7	96.2	97.4	99.9	97.3	10.1	74.8	11.3	14	10.9	0.1853	1.2589	-1.4442	0.743393	0.884398	-2.54674	17.8602
595	-3441.21	3.89119	99	96.8	97.8	99.9	97.9	10.4	77.6	7.8	12	10	0.0823	1.4836	-1.5659	0.894874	0.926739	-2.85615	17.3296
596	-3441.11	3.84257	99.1	96.2	97.6	98.8	97.8	14.6	71.9	3.7	17.4	13.6	0.0254	1.7539	-1.7793	0.971397	0.93268	-3.30582	27.452
597	-3441.16	3.83832	98.9	95.6	97.6	99.6	97.5	9.8	83.4	4.4	10.5	14	-0.4527	-1.2045	1.6571	0.453681	0.963497	2.77587	18.5302
598	-3441.18	3.86194	99.3	96.6	97.5	99.3	97.8	14.7	61	14.3	19.9	10.2	-0.2494	-1.7395	1.9889	0.749229	0.929422	3.51149	16.9409
599	-3441.25	3.8312	99.3	96.7	97.6	98.1	98.3	34.3	35.8	3.9	39.1	11.2	-0.5492	-1.8613	2.4104	0.544342	0.97285	4.09431	23.9022
600	-3441.1	3.8593	98.9	96.4	96.9	99.2	97.8	10.2	76	8	13.2	14.8	-0.3238	-1.1399	1.4637	0.557594	0.83421	2.49168	13.375
Average	-3441.17	3.86539	99.1117	96.4253	97.6425	99.3007	97.9597	13.7818	71.184	9.589	14.3317	11.9597	-0.200429	-0.783745	0.984172	0.728826	0.939323	1.69428	21.1685
Standard-Deviation	0.0509159	0.0205048	0.415408	0.346687	0.340113	0.402409	0.336957	6.78757	13.8676	7.28236	6.12042	1.86237	0.267968	1.21647	1.3936	0.203574	0.0446405	2.46712	7.19698

## Sheet: 300K-Data
Structure-Nr.	FSPE / Ha	Mull (Fe)	α dxy / %	α dxz / %	α dyz / %	α dx²-y² / %	α dz² / %	ß dxy / %	ß dxz / %	ß dyz / %	ß dx²-y² / %	ß dz² / %	Vxx / a.u.-3	Vyy / a.u.-3	Vzz / a.u.-3	η	δ / mm s-1	ΔEQ / mm s-1	tRun / core∙h				98	206	400	522	557
1	-3441.14	3.85154	98.8	96.3	98.1	99.3	97.9	13.2	71.8	7.8	15.5	14.1	-0.5267	-1.2241	1.7509	0.398346	0.978527	2.91123	24.6196				4	4	16	8	8
2	-3441.19	3.85481	98.9	96.2	97.2	98.9	97.6	9.7	79.4	10.2	11.3	11.3	-0.0712	-1.1833	1.2546	0.886424	0.944138	2.28376	18.4713
3	-3441.22	3.85868	99.1	97	97.1	99.4	98	11.3	74.8	8.1	15.1	12	-0.4755	-1.2038	1.6793	0.433718	0.964793	2.80528	21.6204
4	-3441.26	3.86928	99.5	97	97.6	99.2	97.8	10.5	75.1	14.8	9.8	9.1	-0.0138	-1.3027	1.3165	0.979048	0.977969	2.45049	18.8125
5	-3441.15	3.84605	99	96.9	97.5	99.6	97.4	8.6	76.3	4.9	11.9	19.8	-0.002	-1.3407	1.3428	0.996971	1.00977	2.51062	15.2558
6	-3441.21	3.87165	98.6	95.9	97.4	99.6	97.7	8.8	81.3	5.5	13.3	10.8	0.1336	1.6744	-1.808	0.8522	0.968321	-3.26513	24.8429
7	-3441.13	3.87718	98.7	96.7	97.6	99.9	97.9	10.7	79.9	4.1	11.6	13.4	0.0763	1.3852	-1.4615	0.895641	0.906386	-2.6661	18.7762
8	-3441.03	3.82467	98	97.2	97.7	98.9	98.4	34.4	45.5	8	23.3	11.3	-0.8166	-1.2351	2.0517	0.203938	1.03303	3.34764	30.2094
9	-3441.16	3.86748	99.2	97	97.2	99.6	97.7	10	86.9	5.5	10	7.5	0.2166	1.4193	-1.636	0.735174	1.01621	-2.87992	17.4118
10	-3441.06	3.82122	98.4	97.4	97	98.6	98.2	27.5	17	28.7	37.1	13.4	-0.7121	-1.4967	2.2088	0.355207	0.967787	3.65376	26.4687
11	-3441.07	3.8697	98.6	96.2	97.6	99.5	98.3	10.7	73	14.5	11.2	11.1	-0.2819	-1.1669	1.4488	0.610849	0.932412	2.48946	18.9898
12	-3441.14	3.81556	98.3	97.3	97.7	99	98.3	29.6	44.2	6	28.8	14.7	-0.9346	-1.4418	2.3764	0.213437	1.01426	3.87993	37.0726
13	-3441.16	3.82343	98.4	97.1	97.4	98.4	98.5	45.3	21	16.5	29.7	12.8	-0.4263	-1.9584	2.3847	0.642465	0.975648	4.12158	37.2302
14	-3441.08	3.825	98.7	95.6	97.1	99.4	97.9	9.6	79.3	12	9.5	13.3	-0.6253	-1.0933	1.7187	0.272311	0.943312	2.8192	25.2729
15	-3441.2	3.87578	99.4	96.9	97.1	99.5	98.4	10.7	74.9	12.6	9.8	11.8	-0.3251	-1.1827	1.5078	0.568772	0.96192	2.57162	18.6715
16	-3441.18	3.84596	98.5	95.7	97.7	98.8	97.9	28.5	45.6	8	26.9	13.6	-0.6156	-1.5279	2.1435	0.425579	0.908576	3.57679	21.5086
17	-3440.95	3.84503	98.8	97.1	97.9	99.3	98.5	29.4	50.7	5	25.4	10.8	-0.6987	-1.5752	2.2739	0.385468	1.0423	3.77491	31.9328
18	-3441.02	3.85833	98.8	97.2	97.7	99.6	98	23.3	59.4	10.5	15.4	13	-0.5627	-1.4128	1.9755	0.43029	1.01443	3.29854	21.3056
19	-3441.13	3.86177	98.9	95.7	97.6	98.6	97.5	11.6	73.7	12.8	10.8	12	-0.1188	-1.2259	1.3447	0.823282	0.918532	2.4126	15.9916
20	-3441.09	3.85285	99.5	96.6	98.2	98.8	97.9	11.4	80.5	9.8	10.2	10.6	-0.107	-1.3054	1.4124	0.848479	0.963678	2.5486	18.5453
21	-3441.17	3.83923	99	96.6	97.4	99.3	98.3	9.1	78.4	11.5	12.9	10.6	-0.0108	-1.2803	1.2911	0.983347	0.914439	2.4058	17.173
22	-3441.17	3.87626	98.7	96.7	97.9	99.4	98.2	11.8	61.3	16.6	17.7	12.4	-0.0974	-1.296	1.3933	0.860216	0.962875	2.52096	19.9455
23	-3441.18	3.87032	99.3	96.6	98	99	98.4	13.1	70.4	13.3	12.8	11.8	-0.3619	-1.5747	1.9367	0.626231	0.969085	3.33711	19.1817
24	-3441.14	3.88592	99.8	97.1	97.7	99.1	98	10.1	75.1	4.1	10.9	17.9	0.0899	1.5786	-1.6685	0.892295	0.945861	-3.04135	17.5445
25	-3441.11	3.87169	98.7	97.4	97.8	99.9	97.8	8.9	80.9	8.4	11.2	10.4	-0.1307	-1.2535	1.3842	0.811139	0.99966	2.47675	28.3161
26	-3441.18	3.89698	99.6	96.9	98.1	99.1	97.7	11.6	72.8	12.5	11.2	9.6	0.2275	1.207	-1.4345	0.68286	0.94041	-2.4987	18.1825
27	-3441.18	3.84692	98.4	97.5	97.3	99.2	98.2	10	44.6	27.6	12.9	25	0.2733	1.45	-1.7233	0.6828	1.0094	-3.00173	24.5482
28	-3441.19	3.86238	98.9	96.5	98.2	98.9	98.3	19	55.6	9.9	25.5	11.7	-0.5073	-1.5833	2.0906	0.514694	0.966588	3.53411	21.408
29	-3441.07	3.83839	98	96.5	97.6	99.4	97.7	11.1	42.8	44.8	11.3	12.6	-0.031	-1.4235	1.4545	0.957434	0.940529	2.69307	22.1416
30	-3441.09	3.89487	99.2	96.6	97.6	99.3	98	11	67.7	12.2	12	17	-0.1775	-1.3439	1.5214	0.766666	0.890395	2.69607	18.0576
31	-3441.08	3.87287	98.9	97.1	98	99.3	97.9	8.5	69	15.1	13.2	13.8	0.0682	1.2942	-1.3623	0.899942	0.943474	-2.48778	18.1607
32	-3441.12	3.83627	99.4	96.7	97.9	99.3	97.5	26.8	57.2	4.8	24.8	11.1	-0.3672	-1.8004	2.1676	0.661203	0.950828	3.75968	22.9525
33	-3441.11	3.85324	99.2	97	98.4	99	97.9	10.4	75.9	14.2	10.1	11.4	-0.3625	-1.5101	1.8725	0.612866	0.989209	3.21868	20.7711
34	-3441.12	3.86556	98.9	96.5	97.8	99.3	98.2	13.4	68.4	9.6	17.1	10.8	-0.2678	-1.4774	1.7453	0.693065	0.962604	3.04614	20.0302
35	-3441.12	3.87633	99.2	96.5	98.3	99.4	97.4	13.1	72.8	7.5	14.8	13.3	-0.1526	-1.6522	1.8048	0.830867	0.86831	3.24372	19.0566
36	-3441.11	3.849	99.1	95.7	97.3	100	97.8	12.8	67.5	13.6	14	14.4	-0.2742	-1.236	1.5102	0.636884	0.909413	2.60734	18.4177
37	-3441.16	3.87102	98.6	96.3	97.3	99.9	98	14.2	65.3	14.7	15.9	11.3	0.0136	1.4787	-1.4923	0.981788	0.902095	-2.77968	18.5632
38	-3441.11	3.79413	98.8	97.3	97	98.3	98.4	46.4	6.4	8.6	54.1	11.3	-1.2242	-1.5796	2.8038	0.126748	0.993861	4.55557	42.8012
39	-3441.07	3.84458	98.5	95.5	97.3	99.2	98.5	12.9	68.7	14.3	15.5	12.9	-0.2763	-1.0874	1.3637	0.594811	0.895708	2.33647	20.3251
40	-3441.2	3.87403	98.8	96.9	97.9	99.5	98.1	13.2	81.2	4.5	11	10.6	-0.0911	-1.5216	1.6126	0.887057	0.965379	2.93598	19.0478
41	-3441.07	3.83302	98.8	96.3	97.4	99.3	98	23.2	61.3	8.6	20.5	10.1	-0.2807	-1.786	2.0668	0.728326	0.930559	3.63315	18.4777
42	-3441.1	3.83427	98.6	96.8	97.7	98.8	98.1	32.1	48.5	7	25.2	9.7	-0.8377	-1.6604	2.498	0.329342	0.986845	4.12047	32.7793
43	-3441.13	3.80365	98.2	96.9	97.6	98.4	98	40.5	15	12.9	44.8	12.2	-0.8065	-1.6609	2.4674	0.34628	1.00894	4.07739	29.7298
44	-3441.23	3.86542	98.8	96	97.5	99.2	98.2	10.6	76.9	9.2	12.7	12.2	-0.3315	-1.3662	1.6977	0.60948	0.913744	2.91637	18.6653
45	-3441.15	3.87121	99.1	96.9	97.8	99.1	98.2	16.7	57.6	11.9	21.4	13	-0.5005	-1.33	1.8305	0.453201	0.912646	3.06604	19.1055
46	-3441.13	3.85331	99	96.8	97.4	98.9	98	22.6	53.8	14.4	18.2	12.7	-0.3976	-1.4985	1.8961	0.580617	0.968316	3.24063	24.6623
47	-3441.12	3.87689	99.6	96.5	97.4	99.1	97.3	11.2	75.7	11.9	11.8	8.9	0.2412	1.3797	-1.621	0.702346	0.948611	-2.83446	18.8881
48	-3441.19	3.82844	99.2	96.7	97.9	98.8	97.8	14.4	67.4	6.4	15.4	20	-0.1945	-1.3257	1.5202	0.74412	0.993738	2.68106	21.8518
49	-3441.19	3.8398	99.3	95.3	97.5	99.2	97.9	11.2	80.4	10.9	9.4	11.9	-0.6159	-1.0675	1.6834	0.268287	0.947137	2.76043	26.3925
50	-3441.23	3.89285	99	96.4	97.3	99.6	98	10.5	79.1	5.9	13.1	11.2	0.009	1.1939	-1.2029	0.984961	0.88448	-2.24242	17.0595
51	-3440.99	3.86705	98.6	97.4	97.5	99.4	97.5	21.5	72.1	3.7	12.6	9.1	0.0856	1.5535	-1.6391	0.895499	0.959561	-2.99015	18.7387
52	-3441.13	3.84746	99.1	96.9	97.8	99.4	97.4	13.7	69.8	7.5	14.9	16.9	0.2502	1.5342	-1.7843	0.719571	0.911514	-3.13104	24.5059
53	-3441.08	3.83281	98.9	96.9	97	98.7	98.4	28.9	25.7	19.3	35.8	13.4	-0.9424	-1.3587	2.3011	0.180894	0.963717	3.74909	24.3809
54	-3441.09	3.87986	99.1	96.9	98	98.9	98	18.9	65	10.7	14.7	9.2	-0.2925	-1.6156	1.9081	0.69342	0.994522	3.33062	20.7564
55	-3441.1	3.86286	99.5	96.2	97.3	98.9	98.1	10.9	80.2	6.8	12	12.5	-0.6416	-1.4035	2.0451	0.372575	0.983353	3.38984	22.4934
56	-3441.03	3.78572	97.8	96.2	97.6	98.4	98.2	44	23.5	6.4	41.7	11.9	-1.1104	-1.809	2.9194	0.239282	0.905124	4.77564	25.5127
57	-3441.16	3.88762	98.5	96.5	97.7	100.2	97.6	14	71.4	7.2	12.6	13.4	-0.113	-1.2803	1.3933	0.837821	0.865912	2.50799	18.7452
58	-3441.23	3.8328	98.7	96.7	97.5	99	97.7	20.2	54.4	6.6	30.1	13.4	-0.4091	-1.5376	1.9467	0.579722	0.941535	3.32645	27.0339
59	-3441.21	3.89199	98.9	96.8	98.2	99.8	98.5	8.9	79.4	7.2	12	10.8	-0.1274	-1.4733	1.6007	0.840864	0.933669	2.88336	15.4178
60	-3441.14	3.86277	99.1	96.5	97.4	98.9	98.2	11.6	82.6	3.7	11.4	12	-0.2502	-1.3987	1.6489	0.696506	0.942431	2.87992	17.3363
61	-3441.2	3.90467	98.8	95.5	97.7	99.2	98.3	11	76.5	5.3	11.8	13.3	-0.2246	-1.3163	1.5409	0.70847	0.823333	2.69768	18.781
62	-3441.19	3.79852	98.1	96.7	97	97.6	98.8	40.8	20.3	5	46.2	12.5	-0.9821	-1.2887	2.2708	0.134981	0.97733	3.69089	43.7256
63	-3441.13	3.83741	98.9	96.3	97.1	98.8	98	13.8	68.6	7.9	18.3	15	-0.4483	-1.2978	1.7461	0.48649	0.908614	2.93899	21.5161
64	-3441.09	3.87018	98.8	96.1	97.8	99.3	97.4	9.6	80.3	5	12.3	12.7	-0.3461	-1.307	1.6531	0.581259	0.914672	2.82557	18.1405
65	-3441.09	3.84178	99	96.2	97.7	98.5	97.5	10.9	69.2	14	9.3	19.6	-0.5601	-1.0267	1.5869	0.294039	0.908871	2.60825	18.7084
66	-3441.16	3.84326	99.2	96.8	98.2	99.1	97.3	10.6	68.5	20.1	13.2	8.9	-0.1111	-1.5417	1.6528	0.865615	1.02458	2.99406	19.1354
67	-3441.13	3.87323	98.7	96.6	97.5	99.3	98.1	10.3	81.4	6.7	10.9	11.8	-0.078	-1.296	1.374	0.886518	0.94274	2.50119	16.913
68	-3440.96	3.84498	99.1	96	97.4	99.7	98.1	9	75.4	9.5	12.1	15.4	-0.0677	-1.5946	1.6623	0.91852	0.942633	3.049	24.3846
69	-3441.03	3.86569	98.6	96.8	97.6	99.1	97	10.1	80.4	8.1	11.1	9.5	0.2352	1.1019	-1.337	0.648243	0.939252	-2.31334	18.8971
70	-3441.15	3.84849	98.4	96.8	97.4	99.2	97.9	15.8	70.1	4.5	17.1	14.7	-0.0486	-1.6652	1.7138	0.943282	0.998239	3.16227	20.7535
71	-3441.11	3.78334	97	97.6	97.8	97.5	98.6	61.9	3	4.2	47.5	10.4	-1.3142	-1.7175	3.0317	0.133049	1.00078	4.92722	41.2605
72	-3441.21	3.83145	99.5	96.8	98.2	100.1	97.7	9	76.7	6.5	11.1	17.6	0.1525	1.2555	-1.408	0.783362	0.969607	-2.50404	19.3753
73	-3441.08	3.84262	98.6	97	97.7	98.7	97.7	19.6	64.1	5.9	19.3	12	0.5822	1.3545	-1.9366	0.398794	0.932507	-3.22035	27.4982
74	-3441.06	3.85489	99.1	96.6	98.2	99.5	98	9.1	83.9	6.4	11.3	10.5	-0.0828	-1.4621	1.5449	0.892867	0.988069	2.81648	18.3902
75	-3441.1	3.86786	99.2	96.6	97.4	99.4	97.9	9.5	59.8	24.4	14.7	11.8	0.341	1.2536	-1.5946	0.572253	0.912446	-2.72139	27.1977
76	-3441.19	3.84617	99	96.9	97.6	99.1	97.4	13.6	67	8	18.8	15.1	-0.3492	-1.5228	1.8719	0.626918	0.978134	3.22598	20.4108
77	-3441.08	3.83749	99.2	96.5	97.4	99.1	98	10.1	76.7	11.7	12.7	12.3	-0.5324	-0.9917	1.524	0.301358	0.948961	2.50672	18.8085
78	-3441.03	3.8857	99	96.4	97.8	99.9	98.5	9.7	69.7	14.8	13.1	12	0.1116	1.433	-1.5447	0.855474	0.882532	-2.7917	18.3761
79	-3441.17	3.86963	99.3	96.6	97.4	98.8	98.1	10.7	67.8	19.4	11.5	10.6	-0.2594	-1.2135	1.4729	0.647819	0.970378	2.54819	21.6985
80	-3441.05	3.84986	99	96.7	97.9	99.9	97.9	9.1	70.3	17.5	15.6	9.5	-0.4887	-1.357	1.8456	0.470468	1.04902	3.09914	23.9481
81	-3441.08	3.82478	99.1	96.3	97.6	99.2	97.8	16.1	64.9	5.9	17.6	18.9	0.3186	1.6206	-1.9392	0.671406	0.950951	-3.37019	21.2609
82	-3441.14	3.86741	99.2	96.2	97.9	99.2	97.9	10.8	72	16.4	11.2	10.2	0.0123	1.489	-1.5013	0.983623	0.954077	-2.79765	18.6325
83	-3441.16	3.85051	99.3	96.1	98	99.8	98.2	9.7	86.1	3.9	13.1	10.2	0.1483	1.1876	-1.3359	0.777928	0.954631	-2.37307	19.1804
84	-3441.17	3.85787	99.1	96.4	97.5	99	97.8	21	63.8	10.3	13.8	12.4	-0.4311	-1.4775	1.9086	0.548297	0.896092	3.24404	21.7362
85	-3441.25	3.86466	99.6	96.9	98.2	99.1	97.7	10.9	86.4	3.5	9.9	10.6	0.0187	1.5539	-1.5726	0.976213	0.977468	-2.92516	18.4359
86	-3441.11	3.8675	99.7	96.2	97.2	100.1	98.1	10.1	69.2	16	11.3	14.4	-0.5985	-0.938	1.5365	0.22094	0.891828	2.51007	18.9747
87	-3441.1	3.8629	98.8	96.4	97.7	99.8	98.1	11.6	72	14.5	14.1	9.6	0.0314	1.3424	-1.3739	0.954265	0.952611	-2.54179	17.189
88	-3441.13	3.86026	99	96.8	97.7	98.5	97.9	9.8	55.3	32.6	12.9	9.4	-0.0365	-1.6561	1.6926	0.956897	0.943024	3.13347	21.7281
89	-3441.15	3.86692	98.8	96.2	98	99.6	97.7	14.8	70.2	8.3	16	10.6	-0.2063	-1.5247	1.731	0.761669	0.949703	3.06422	18.1317
90	-3441.11	3.87564	98.6	96.1	97.6	100.5	98.1	11.6	81.5	3.4	12.2	12	-0.0825	-1.5021	1.5847	0.895855	0.915258	2.89099	21.2618
91	-3441.17	3.83324	98.7	96.4	97.5	99.5	97.7	8.7	82.9	3.4	11.4	16.4	-0.0989	-1.1937	1.2925	0.847006	0.978349	2.3315	18.1565
92	-3440.99	3.86116	98.7	96.4	97.4	100.1	98.3	10.6	84.9	3.9	11.8	11.1	-0.0982	-1.4069	1.5051	0.869566	0.951835	2.729	21.3045
93	-3441.21	3.85463	99.2	96.7	97.9	99.1	97.9	20.1	65.4	7.3	20.7	9.6	-0.3681	-1.6901	2.0581	0.642341	0.958276	3.55706	17.8474
94	-3441.14	3.90256	99	96.6	97.8	99.5	98.2	10.5	78.8	8.7	9.4	9.7	-0.0664	-1.639	1.7053	0.922152	0.956259	3.13065	18.75
95	-3441.1	3.85166	99.3	97.1	96.5	100.2	97.9	28.7	8.8	49.9	21.7	12.5	-0.7128	-1.3861	2.0989	0.320782	0.91406	3.45902	33.6374
96	-3441.15	3.81067	99.2	97.5	97.9	97.9	98.8	48.2	3.8	7.2	55.1	10.7	-1.2225	-1.4443	2.6669	0.083172	1.07721	4.32653	38.7234
97	-3441.04	3.88849	99.2	97.1	98.2	99.1	98	14.5	68.3	11	11.7	11.9	0.0164	1.2175	-1.2339	0.973461	0.87128	-2.29364	17.3098
98	-3441.07	3.83375	98.4	95.8	97.5	98.4	98.2	11.6	83.5	5.4	9	11.9	-0.5768	-1.1566	1.7334	0.334513	0.964948	2.8608	26.9338
99	-3441.19	3.87892	99.5	96.2	97.9	98.8	97.5	11.4	76	10.4	11.3	10.7	0.1976	1.7003	-1.8979	0.791774	0.868888	-3.38152	21.4659
100	-3441.21	3.84148	99.1	96.2	97.7	98.1	98.1	10.4	78.4	13.7	8.3	10.9	-0.396	-1.2144	1.6104	0.508223	0.981917	2.71956	18.8326
101	-3441.15	3.8455	98.3	96.2	97.5	99.1	98.7	29.1	50.6	6.2	22.9	13.7	-0.604	-1.6652	2.2692	0.467657	0.957777	3.80884	17.0367
102	-3441.16	3.84327	99.4	96.7	97.5	99.1	97.7	12.3	79.9	7.2	10.6	12	-0.114	-1.2709	1.3848	0.835423	0.924496	2.49141	17.298
103	-3441.12	3.86006	99.2	96	97.3	99.3	97.8	10.9	81.6	4.6	12.7	11.7	-0.0651	-1.3755	1.4406	0.909684	0.891418	2.63674	18.8157
104	-3441.06	3.84274	97.9	96.3	98.1	98.6	98.1	31.2	43.4	3.7	31.8	12.4	-0.3193	-2.0479	2.3672	0.730253	0.89569	4.16294	30.2714
105	-3441.15	3.86945	99.1	96.3	97.5	98.8	98.3	20.8	60.9	6.9	18.8	12.3	-0.4676	-1.6234	2.091	0.552708	0.979405	3.5567	21.2509
106	-3441.13	3.87328	98.9	97.2	98.2	99.5	97.7	9.2	75	15	10.9	9.3	0.0571	1.5887	-1.6458	0.930566	1.02394	-3.02753	19.1671
107	-3441.12	3.85164	98.8	96.4	97.4	98.9	97.1	9.1	81.8	4.9	12.3	13.8	-0.0204	-1.5795	1.5999	0.974445	0.934145	2.97472	21.7342
108	-3441.04	3.89492	98.7	96.5	97.5	99.4	98.4	12.9	72	11.8	12.4	11	-0.2957	-1.3642	1.66	0.643706	0.86301	2.86964	19.6204
109	-3441.09	3.82699	99.5	96.1	97.6	98.6	97.8	10	82.7	7.6	12.8	12.7	-0.3853	-0.9779	1.3632	0.434748	0.920221	2.27751	18.0031
110	-3441.18	3.85837	99	96.2	97.4	99.1	98.1	9.9	84.2	4.8	11.3	11.8	-0.141	-1.2257	1.3667	0.793706	0.952216	2.43607	16.5713
111	-3441.14	3.8686	98.9	96.2	97.4	98.8	98.1	12.8	80	4.3	10.6	11.7	-0.3841	-1.4536	1.8377	0.581955	0.949548	3.14149	18.6153
112	-3441.1	3.8723	99	96.2	97.6	99.2	98.2	12.4	81.1	6	11.3	9.3	0.124	1.3241	-1.4481	0.828727	0.951014	-2.60132	17.6764
113	-3441.13	3.8609	98.9	96.7	97.6	99.7	97.7	14.5	61.4	20.4	13.7	11.5	-0.3264	-1.3269	1.6533	0.605124	0.924442	2.83785	38.424
114	-3441.16	3.86679	99.2	96.4	97.9	99.8	97.2	11.5	84.2	3.5	11.5	9.8	0.2167	1.3753	-1.592	0.727759	0.934607	-2.79824	18.1423
115	-3441.15	3.87715	99.1	96.5	98.4	98.9	98.1	19.5	59.9	6.3	20.4	12.5	-0.3579	-1.6363	1.9942	0.641037	0.978301	3.44571	23.0493
116	-3441.09	3.85924	99.4	95.9	97.6	99.6	97.7	9.9	83.9	5.5	11.6	9.7	0.1938	1.3928	-1.5866	0.755745	0.917197	-2.805	16.8886
117	-3441.03	3.86865	99.1	96.5	97	99.3	97.6	10.9	64.6	19	11.2	14.9	-0.2895	-1.2195	1.5091	0.616307	0.895157	2.59554	17.9543
118	-3441.13	3.89531	99.6	96.5	97.5	99.3	97.8	11.1	72.2	8.8	12.5	15.1	-0.4707	-1.0991	1.5698	0.40036	0.902964	2.61084	16.4031
119	-3441.16	3.88859	99.8	95.9	98.1	98.5	98.2	12.1	74.3	6.8	12.8	13.2	0.0381	1.3629	-1.401	0.945626	0.868694	-2.58651	15.8327
120	-3441.17	3.85196	98.5	96.2	97.3	99	97.7	11.3	73.9	8.6	14.6	14.7	0.089	1.2156	-1.3046	0.863513	0.856369	-2.3622	17.3147
121	-3441.12	3.92824	99.4	96.3	97.1	100.3	98.8	9.5	72.1	9.2	12.7	12.1	-0.015	-1.3899	1.4049	0.978609	0.856918	2.61483	15.9856
122	-3441.17	3.81939	98.6	97.6	97.6	98.7	98	48.7	3.8	19.4	40.1	11.6	-1.2549	-1.3601	2.615	0.040204	1.08355	4.23862	36.3331
123	-3441.19	3.83989	99.2	96.3	97.4	98.7	98.1	12.5	80.2	4.3	12.3	13.6	0.1329	1.4157	-1.5486	0.828417	0.933504	-2.78169	21.2566
124	-3441.18	3.85255	98.9	96.4	97.5	99.1	97.7	15.9	49	28.4	15.8	12.9	-0.4045	-1.5406	1.945	0.58412	1.00314	3.32625	20.4923
125	-3441.12	3.8486	99.2	96.4	97.4	99	97.5	11	83.6	4.1	12.5	10.7	0.0516	1.3862	-1.4378	0.928253	0.94365	-2.64342	20.9501
126	-3441.18	3.8731	98.9	96.9	97.8	98.9	98.4	9.7	71	14.7	11.6	12.6	-0.2169	-1.4612	1.6781	0.741545	0.927292	2.95799	19.5572
127	-3441.18	3.86235	99	96.3	98	99.7	98.3	10.4	80	6.2	13.4	11.5	-0.2261	-1.6504	1.8766	0.758997	0.964941	3.32003	22.3054
128	-3441.09	3.91893	98.8	96.2	97.9	99.9	97.8	10.1	63.3	15.2	15.5	11.5	0.0935	1.6832	-1.7767	0.89477	0.802089	-3.24051	19.5844
129	-3441.2	3.85944	99.4	96.2	98	99.6	97.6	10.8	81.2	3.7	11	13.8	0.0071	1.5151	-1.5221	0.990736	0.957152	-2.84149	17.3069
130	-3441.15	3.85638	99.4	96.4	97.8	99	97.6	10.5	73.6	8	15.2	14.3	0.103	1.2467	-1.3497	0.847397	0.894798	-2.43482	17.9825
131	-3441.18	3.87156	98.4	96.6	97.9	99.3	97.9	10.9	83.5	5.9	10.8	9.5	-0.086	-1.4417	1.5278	0.887413	0.920234	2.78166	18.1624
132	-3441.18	3.82918	99.3	96.6	97.4	99.5	97.2	9.3	76.2	3.9	13.3	19.4	0.0261	1.5214	-1.5474	0.966313	0.909251	-2.87141	18.4724
133	-3441.17	3.82078	98.4	97.6	97.7	99.1	97.8	41.7	5.9	26.8	40.8	9.8	-1.149	-1.6861	2.835	0.189455	0.982636	4.62139	66.3016
134	-3441.06	3.81412	98	97.5	97.7	97.8	98.1	47.5	6.7	7	52.7	10.6	-0.951	-1.8264	2.7774	0.315178	1.07373	4.57448	27.0447
135	-3441.16	3.84106	99.4	96.8	96.8	99.1	97.4	24.8	50.2	9.3	26.4	13.3	-0.8624	-1.2002	2.0626	0.163755	0.966959	3.35723	17.1633
136	-3441.12	3.8967	99.7	96.3	98.2	99.7	98.1	13.8	73.7	4.5	14.6	11.6	0.1868	1.6336	-1.8204	0.794794	0.866622	-3.24562	17.6042
137	-3441.13	3.87005	98.2	96.6	97.6	98.9	98	22.2	61.8	8.5	17.3	11.1	-0.4821	-1.6219	2.104	0.541726	0.985732	3.57226	21.6523
138	-3441.16	3.83841	98.3	97.1	97.3	99.5	97.6	23.1	41.8	25.8	20.1	13.6	-0.435	-1.6727	2.1077	0.587256	0.916328	3.60641	25.7163
139	-3441.09	3.87736	99.1	96.8	97.6	99.5	97.8	12.3	79.6	7.4	10.3	10.1	0.1595	1.2814	-1.4409	0.778623	0.915881	-2.55999	18.0822
140	-3440.91	3.86395	99.4	96.7	97.5	99.6	97.6	11.7	83.6	4.7	10.8	9.4	-0.0395	-1.3392	1.3787	0.942752	0.960025	2.5436	19.0012
141	-3440.97	3.82847	98.6	96.7	96.4	98.7	97.6	21.4	57.1	11.3	24.1	11.2	-0.9504	-1.2589	2.2093	0.13963	0.880955	3.59174	33.4682
142	-3441.06	3.86284	98.9	96.4	97.6	99.6	97.8	10	84.9	3.9	10.1	11.2	-0.3438	-1.1845	1.5283	0.550039	0.97126	2.59845	23.6829
143	-3441.16	3.85819	99	96.3	97.5	99	97.9	8	81.3	10.4	11.7	10	-0.1471	-1.2846	1.4316	0.794533	0.975643	2.55233	17.5957
144	-3441.2	3.88038	99.2	97.1	97.7	99.2	98.1	9.5	75.7	14.1	10.3	10	-0.1037	-1.6708	1.7745	0.883075	1.0066	3.22768	19.3874
145	-3441.12	3.83345	98.3	96.4	97.3	98.9	98.1	20.3	61.8	5.6	23.3	11.3	-0.395	-1.3256	1.7205	0.540853	1.02229	2.92082	20.7863
146	-3441.09	3.85559	99.6	96.2	97.7	99.2	97.6	10.6	83.3	3.5	9.8	13.3	-0.0513	-1.5783	1.6296	0.937059	0.972466	3.00241	18.4961
147	-3441.2	3.87603	99.7	96.5	97.6	99.1	98	11.7	80.3	5.8	12	11.5	0.0508	1.4331	-1.484	0.93147	0.898412	-2.73042	21.1812
148	-3441.2	3.86345	99.7	96.6	97.7	99.1	97.7	21.1	56.7	11.2	19.6	12.5	-0.4053	-1.7186	2.1239	0.618349	0.905509	3.65434	29.2545
149	-3441.12	3.84063	98.7	96.4	97.6	99.1	98.1	16.2	71.8	6.9	18.1	9.8	-0.3256	-1.5034	1.829	0.643962	1.02022	3.16198	21.9017
150	-3441.23	3.84318	100.1	96.3	97.9	98.9	97.3	14.7	77.4	3.6	10.9	15.7	0.3441	1.2244	-1.5685	0.561232	0.935754	-2.67175	18.4553
151	-3441.18	3.84863	99.5	97.1	98.6	99	98	11.7	76.5	8.1	15.4	9	-0.1793	-1.6126	1.7919	0.799859	1.07422	3.19831	30.1462
152	-3441.16	3.86029	99.2	96.2	97.8	98.8	97.7	8.8	84.7	5.1	11.5	9.5	0.0674	1.6089	-1.6762	0.919624	0.955411	-3.07536	21.7795
153	-3441.02	3.88349	99	96.8	97.1	99.4	98.1	15.6	45.5	34.6	13	11.7	0.0053	1.6186	-1.6239	0.993469	0.938437	-3.03354	28.4436
154	-3441.14	3.85153	99.6	96.7	97.8	99.1	97.8	10.9	85.3	3.4	11	11.9	-0.1122	-1.3424	1.4546	0.845761	0.977403	2.62314	21.1582
155	-3441.12	3.81367	98.9	96.9	97.2	98.8	98	34.7	32.4	10.3	34.5	12.4	-0.1322	-1.7654	1.8975	0.860701	0.967384	3.43356	45
156	-3441.12	3.86167	98.8	96.8	98.2	98.8	97.4	10.9	68.4	14.9	16.7	8.3	0.0868	1.6366	-1.7234	0.899246	0.934707	-3.14669	18.1881
157	-3441.11	3.8466	98.5	96.6	97.7	98.5	98.7	11.2	81.6	7.5	10.5	12.1	-0.4049	-1.2415	1.6464	0.508188	0.958669	2.78031	20.6019
158	-3441.18	3.84179	99.4	96.4	97.8	99.9	97.9	12	82.4	5.5	11.6	10.5	-0.0358	-1.4205	1.4564	0.950819	0.957734	2.69216	20.1562
159	-3441.16	3.90716	99.3	96.4	97.6	99.5	98.1	12.2	68.9	13.2	11.7	11.7	-0.2336	-1.2864	1.52	0.692579	0.872775	2.65276	19.9968
160	-3441.06	3.8588	98.9	96.2	97.7	99.8	97.4	10	77.6	3.8	15.9	15.6	0.1772	1.3774	-1.5546	0.772038	0.940381	-2.75808	17.7833
161	-3441.09	3.89692	99.3	96.8	97.8	99.2	97.7	13.2	63	7.3	12.3	22.8	0.009	1.4726	-1.4816	0.987818	0.861747	-2.76385	20.8757
162	-3440.98	3.86455	98.1	96.5	97.5	99.8	98.1	9.2	75.5	14.9	11.5	9.4	0.0398	1.3882	-1.428	0.944276	0.955433	-2.63545	24.3215
163	-3441.15	3.87114	98.8	96.3	97.6	100.2	97.6	9.9	84.8	4.7	11.5	10.6	0.0405	1.5296	-1.5701	0.948411	0.930638	-2.90066	18.7432
164	-3441.22	3.8429	98.8	96.3	97.5	98.9	97.3	13.8	75.2	5.8	17	12.5	-0.0766	-1.3981	1.4747	0.896106	0.899862	2.69058	20.0792
165	-3441.13	3.87516	98.7	96.6	98.3	98.8	98.6	11.9	79.9	4.8	13.4	10.6	-0.1326	-1.6295	1.7621	0.84953	0.983446	3.18034	20.8465
166	-3441.06	3.88506	99	96.3	97.7	99	97.9	11.8	72.6	5.8	15.4	15.1	0.0526	1.6966	-1.7492	0.939813	0.89879	-3.22496	24.4019
167	-3441.23	3.91106	98.9	96.1	97.6	100.3	97.6	11	76.9	6.2	12.5	12.8	0.0857	1.3098	-1.3955	0.877163	0.839223	-2.53481	17.0488
168	-3441.15	3.89254	99	96.3	98	99.3	98.3	12.1	71	13.5	11.3	10	-0.0852	-1.5743	1.6595	0.89733	0.948752	3.02853	18.786
169	-3441.16	3.84655	99.4	96.6	97.4	99.3	97.8	10.9	76.6	13.3	12.5	10.1	-0.1801	-1.1077	1.2878	0.72029	0.991773	2.26015	19.4157
170	-3441.18	3.8672	99.4	96.3	97.7	99.1	98.3	11.5	71.4	8	12.8	17	-0.4864	-1.2485	1.7349	0.439225	0.941289	2.90029	18.4797
171	-3441.22	3.84841	98.5	96.5	97.6	98.6	98.1	27	49.9	9.5	23.1	13.1	-0.6473	-1.3624	2.0097	0.355807	0.957481	3.32463	24.324
172	-3441.01	3.86951	98.8	96.6	97.5	99.9	98	9.7	83.9	4.7	11.8	12	-0.1288	-1.2319	1.3607	0.810752	0.934115	2.43454	18.4089
173	-3441.19	3.88222	99.9	96.7	97.8	99.6	98	15.2	77.7	5.2	10.3	10.4	0.0937	1.4065	-1.5001	0.875127	0.91611	-2.72354	22.4961
174	-3441.19	3.86094	99.3	96.1	97.4	99.2	97.8	10	81.1	5.4	11.3	13.2	-0.3056	-1.2465	1.5521	0.606204	0.92189	2.66466	21.7105
175	-3441.18	3.88608	99.3	96.3	97.9	98.9	98	11.9	72.1	7.5	14.2	13.9	-0.2521	-1.2387	1.4908	0.661854	0.862153	2.58608	18.7505
176	-3441.2	3.86036	99.1	96.5	97.3	99	98.6	14.2	79.1	5.7	11.3	10.3	-0.2745	-1.3531	1.6275	0.662729	1.03084	2.82381	22.2881
177	-3441.14	3.88805	99	96.4	97.9	100	98	13.7	73.8	6.7	13.9	10.7	-0.057	-1.4641	1.5211	0.925097	0.906599	2.79433	17.9386
178	-3441.07	3.83908	98.6	97.4	98	98.1	98	31.1	37.8	6.9	36.3	11.3	-0.5203	-1.8665	2.3868	0.564022	0.992415	4.06764	20.2372
179	-3441.09	3.85931	98.8	96.2	98.2	99.5	98.4	9.8	70.7	3.6	14.9	20.7	-0.1311	-1.6046	1.7357	0.848887	0.925096	3.13224	20.9982
180	-3441.17	3.86387	98.9	96.6	97.3	99.6	97.8	10.4	81.7	5.1	12.8	10.7	0.1812	1.5919	-1.7731	0.795657	0.961554	-3.16184	18.718
181	-3441.14	3.85878	98.9	96.2	98.2	99.5	98.5	8.5	85.7	5.7	10.4	11	-0.4458	-1.2078	1.6535	0.460845	0.993454	2.77269	18.7213
182	-3441.2	3.88301	98.7	96.1	97.5	99	98.1	9.7	76.6	9.2	13.2	12.6	-0.2991	-1.4408	1.7399	0.656195	0.87396	3.01495	17.4211
183	-3441.07	3.85002	98.9	96.3	96.9	99.7	97.6	9.7	79.1	8.9	13.5	11.7	-0.156	-1.3636	1.5196	0.794722	0.905267	2.70924	20.2425
184	-3441.12	3.86835	99	96.3	97.6	99.7	97.6	10	79.1	8.8	11.5	11.9	-0.1633	-1.5477	1.711	0.809094	0.90288	3.06025	19.7032
185	-3441.07	3.85655	99	96.7	98.4	99	98.3	16.5	78.4	5.1	10.1	10.4	-0.132	-1.6623	1.7943	0.852883	0.980282	3.24097	16.6233
186	-3441.16	3.86491	98.3	96.4	97.8	99.9	97.2	10	80.7	5.2	14.4	10.6	0.2161	1.4318	-1.648	0.737691	0.878544	-2.90257	27.3654
187	-3441.21	3.90809	98.6	96.5	97.8	99.3	98.2	9.9	65.2	18.5	12.7	10.6	0.0367	1.4314	-1.4682	0.949956	0.912684	-2.71343	18.5072
188	-3441.24	3.86219	98.8	95.7	97.7	99.5	98.3	12	80.1	6.7	10.8	11.1	-0.1873	-1.2101	1.3975	0.731917	0.933415	2.45838	21.3908
189	-3441.1	3.86444	99.3	95.9	98.3	99.3	98.4	12.1	78.7	9	12.1	9.5	-0.1281	-1.7275	1.8556	0.861905	0.972743	3.35865	17.244
190	-3441.16	3.91297	98.8	96.2	98.1	99.7	97.7	9.4	71.4	6.7	13.9	14.6	0.0742	1.6363	-1.7106	0.913202	0.807718	-3.13354	17.8492
191	-3441.11	3.84482	99.1	95.9	97.4	99.4	97.9	16.6	68.3	4.2	21.1	12.5	-0.1526	-1.6759	1.8286	0.83308	0.931499	3.28801	24.6117
192	-3441.08	3.88354	99.5	96.4	98.6	99	97.8	10.8	79.9	7.1	9.3	11.4	-0.276	-1.6239	1.8998	0.709487	0.971347	3.32683	21.406
193	-3441.19	3.84413	98.3	96.2	97.5	98.7	97.6	32.6	42.5	7.5	30.5	9.4	-0.8911	-1.5503	2.4414	0.269993	0.980421	4.00386	18.0553
194	-3441.17	3.87788	99.5	96.6	97.5	99	98.4	12.5	74.6	4.7	14.1	13.9	-0.0881	-1.6461	1.7342	0.898366	0.933643	3.16578	21.3554
195	-3441.12	3.86155	99	96.7	97.8	99.1	97.6	18.1	54.9	13.7	22.2	12.1	-0.4536	-1.8184	2.272	0.600712	0.961282	3.89676	27.7152
196	-3441.21	3.84521	99.5	96.5	97.5	99.2	98.1	11.7	31.6	59.8	9.5	9.5	-0.0888	-1.4298	1.5186	0.883041	0.990908	2.76217	26.4589
197	-3441.06	3.89092	98.9	96	97.7	99.3	98.4	9.9	68.1	12.9	12.7	14.4	-0.157	-1.1535	1.3104	0.760455	0.862623	2.31914	17.9587
198	-3441.16	3.83656	97.9	96.6	97.7	98.9	98.1	29.3	50.1	4.8	26.1	13.3	-0.6375	-1.8302	2.4677	0.483318	0.91886	4.15156	22.9408
199	-3441.18	3.83984	98.8	96.3	97.7	98.9	98.7	13.7	69.2	17.1	12.4	10.7	-0.4071	-1.241	1.6481	0.505993	1.01931	2.78228	21.6539
200	-3441.01	3.87132	99.3	96.4	97.5	99	97.9	12.3	83.6	4.7	11.3	9.5	0.2226	1.2141	-1.4367	0.690176	0.916866	-2.50614	21.166
201	-3441.21	3.86788	98.6	96.5	97.6	99.8	97.5	16.1	63.3	10.5	14.2	15.6	-0.1093	-1.519	1.6284	0.865702	0.915351	2.94997	28.1626
202	-3441.15	3.88367	98.6	96.2	97.4	99.9	98	16.8	57.3	15.8	18.4	11.5	-0.343	-1.5053	1.8483	0.628852	0.852572	3.18629	16.5098
203	-3441.16	3.8577	98.6	96.1	97.9	98.7	98.3	20	62.2	8	18	13.6	-0.5987	-1.5055	2.1042	0.43095	0.959593	3.51375	26.2106
204	-3441.1	3.84378	98.6	96.9	97.7	99	97.8	9.8	82.3	4.7	14.1	10.9	0.0459	1.3607	-1.4066	0.934796	0.990949	-2.59001	18.9281
205	-3441.14	3.86151	98.9	96.4	97.4	99.2	98.2	10	81.3	6.5	11.5	11.8	0.0611	1.0444	-1.1055	0.889429	0.931406	-2.01378	15.1178
206	-3441.19	3.86085	99.4	96.4	97.9	99.7	98.1	9.7	85.2	4.5	11.5	10.4	-0.1436	-1.5217	1.6654	0.827499	0.98131	2.9908	34.3301
207	-3441.1	3.85211	98.5	96.7	97.5	99.7	97.7	10.4	52.6	35.5	10.9	10.9	0.223	1.3395	-1.5624	0.714597	0.983738	-2.73882	21.2313
208	-3441.08	3.86522	99.3	97.2	97.8	99.2	98.1	14.4	71.7	11.8	12	10.8	-0.0837	-1.5986	1.6823	0.90046	0.982552	3.07244	21.794
209	-3441.06	3.83285	98.6	96	96.9	99.2	97.3	8.7	76.9	14.3	9.7	13.4	-0.745	-0.9441	1.6891	0.117895	0.945548	2.7434	25.0056
210	-3441.08	3.88847	99.1	96.8	97.2	99.7	98.3	11.3	65	15.5	15.2	11	-0.2251	-1.4765	1.7016	0.735455	0.953287	2.99566	31.3452
211	-3441.24	3.83243	99	97.2	97.2	98.7	98.1	28.2	58.6	5.4	20.4	11.7	-0.5478	-1.4879	2.0357	0.461804	0.981291	3.41406	20.9101
212	-3441.15	3.88	99.2	96	97.5	98.9	98	10.8	72	10	13	13	-0.2298	-1.513	1.7428	0.736323	0.881959	3.06868	18.0774
213	-3441.14	3.90604	99.5	96.7	98.1	99.7	97.5	12.9	61.7	19.4	11.9	12.2	0.2815	1.2739	-1.5554	0.63807	0.826045	-2.68596	20.192
214	-3441.2	3.82742	98.2	97.3	98.1	98.9	97.9	22	57.9	7.1	20.2	15.3	-0.4905	-1.4801	1.9705	0.502212	1.06726	3.32468	21.2059
215	-3441.1	3.85338	99.5	97.1	97.8	99.5	97.8	10.3	79.1	9.8	14.3	7.9	0.1766	1.4522	-1.6288	0.783141	1.00052	-2.89666	37.5337
216	-3441.14	3.83212	98.8	96.7	97.7	98.7	98.5	19.1	63.6	13.1	14	12.8	-0.5053	-1.301	1.8064	0.440493	0.977731	3.02034	20.9651
217	-3441.13	3.83652	99.1	97	97.7	99.3	97.3	10.3	65.3	7.3	20.7	18.4	-0.2785	-1.19	1.4685	0.620723	0.942771	2.52778	28.3009
218	-3441.11	3.86931	99	96.4	97.8	99.6	98.1	9	83.3	3.6	13.1	11.8	-0.1792	-1.3316	1.5108	0.76282	0.934864	2.67502	17.4116
219	-3441.1	3.88103	99.2	96.7	97.5	99.3	98.2	12.7	71.7	12.7	11.9	10.9	-0.1443	-1.347	1.4913	0.80649	0.968779	2.66566	18.029
220	-3441.07	3.85274	100.4	96.2	97.2	99.1	98.2	23.7	60	5.2	22.9	10.7	-0.2647	-1.9393	2.204	0.759774	0.985977	3.89999	32.8271
221	-3441.14	3.83148	99.3	96.2	97	99	97.9	14.3	63	19.2	13.6	14.5	0.2439	1.5475	-1.7915	0.727659	0.917728	-3.14879	21.4319
222	-3441.09	3.84891	98	95.9	97.8	99.4	98.3	10.3	82	6.4	13.5	10.3	-0.3802	-1.3563	1.7364	0.562132	1.00239	2.95826	18.0652
223	-3441.07	3.86927	99.4	96.5	97.6	99.2	98.3	11.8	77	4.9	10.9	15.6	-0.1844	-1.2411	1.4255	0.741224	0.944962	2.51263	18.6662
224	-3441.21	3.88034	99.4	96.5	98.1	99.2	97.3	14.6	72.7	9.4	11.9	10.8	-0.0421	-1.5668	1.609	0.947624	0.9128	2.97194	21.4244
225	-3441.2	3.84943	99.6	96.6	97.4	99	98	20.1	65.7	3.7	19.8	13.6	-0.2111	-1.7778	1.9889	0.787709	0.928242	3.54063	21.8525
226	-3441.15	3.88082	99.7	97	98	99.4	97.8	11.7	66.4	11.8	15.8	13.8	-0.1822	-1.4875	1.6696	0.781757	0.957538	2.96839	18.2084
227	-3441.14	3.87262	98.6	96.4	97.8	99.7	97.8	9.7	71.6	16.1	12.3	9.4	0.1497	1.4434	-1.5931	0.812117	0.944427	-2.85122	18.5252
228	-3441.08	3.91981	98.4	97.4	97.2	99.4	98.3	9.6	46.8	29.3	17.1	12.6	-0.0966	-1.5611	1.6578	0.88342	0.878265	3.01557	23.8078
229	-3441.15	3.86081	99.1	96	97.8	99.6	98.5	9.8	82.9	5.7	10.6	10.7	-0.3793	-1.4106	1.7899	0.576216	0.977469	3.05676	18.6558
230	-3441.01	3.86713	98.8	96.1	97.5	99.5	98.1	10.8	78.1	8.4	11.3	12.2	-0.1475	-1.3351	1.4826	0.801035	0.872835	2.647	18.4294
231	-3441.17	3.8833	98.8	96.5	97.5	99.5	97.8	10.5	71.9	13.9	11.7	11.5	-0.0164	-1.1122	1.1286	0.970965	0.907	2.09657	19.5773
232	-3441.17	3.85763	99.1	96.7	97.8	99.6	98.2	11.1	75.5	6.5	17.8	12.2	-0.2759	-1.4913	1.7672	0.687793	0.969185	3.08118	19.1785
233	-3441.2	3.82508	98.6	95.9	96.6	99	97.5	17.1	71.1	8.7	14.7	13.1	-0.2991	-1.1579	1.4569	0.58944	0.844796	2.49386	18.5553
234	-3441.18	3.84267	98.6	96.4	97.4	99	97.1	12.1	75.4	6.9	16.9	10.4	0.3974	1.4259	-1.8233	0.56412	0.926112	-3.10731	42.2315
235	-3441.18	3.80516	99.1	96.7	97.8	98.2	98.1	42.9	17.9	3.3	50.4	12	-0.978	-1.732	2.7099	0.278236	0.99486	4.44759	40.5863
236	-3441.19	3.86674	99.7	95.7	97.7	98.8	98	12	83.6	4	10.9	12.1	0.0991	1.2917	-1.3908	0.85752	0.874624	-2.51479	19.1459
237	-3441.09	3.86549	100	96.1	97.3	99.3	98	16.3	67.1	11.1	14.9	11.8	-0.294	-1.412	1.706	0.655349	0.950076	2.95576	18.8961
238	-3441.24	3.78061	98.4	96.9	97.4	98.7	97.7	47.5	18.1	6.5	44.4	12.6	-0.9277	-1.289	2.2166	0.162995	1.01102	3.60783	33.1189
239	-3441.14	3.90796	99.1	95.8	97.7	99.2	98.1	9.6	72.8	11.4	11.4	11.3	-0.0896	-1.5474	1.637	0.890586	0.894749	2.98274	17.6804
240	-3441.15	3.86874	99.1	96.1	96.8	99.6	98.1	11.1	75.2	11.4	13.3	11.5	0.0058	1.0718	-1.0776	0.989301	0.879573	-2.0109	21.8463
241	-3441.14	3.86708	98.1	97.1	97.8	99.2	98.3	15.9	53.6	13.1	22.1	14.4	-0.472	-1.4198	1.8918	0.500988	0.957916	3.1913	21.0851
242	-3441.19	3.92422	99	95.9	97.7	99.9	98.2	10.3	74.4	4.2	12.9	14.7	-0.1309	-1.455	1.5859	0.834871	0.821343	2.85286	15.9598
243	-3441.17	3.85244	99.4	95.9	97.6	98.8	98	14.2	77.2	6.5	12.2	13.1	-0.2306	-1.4422	1.6729	0.724259	0.846175	2.93822	21.0012
244	-3441.13	3.87061	99.8	96.3	97.6	99.4	98.3	11.4	75.7	9.1	11.5	13.3	-0.255	-1.3738	1.6288	0.68683	0.937374	2.83934	17.6306
245	-3441.15	3.86149	98.6	96.7	97.8	99.4	98.1	11.5	80.9	5.5	12.8	9.3	-0.0148	-1.5797	1.5945	0.981447	0.965855	2.96979	24.1625
246	-3441.17	3.84116	99	96.5	97.9	99.5	98.5	19.5	58.2	12.6	21	12.3	-0.7388	-1.294	2.0328	0.273143	0.979471	3.33477	21.3157
247	-3441.12	3.86105	99.2	96.3	97	99.4	98.2	10.4	75.6	14.2	9.1	12.6	-0.5494	-1.0802	1.6296	0.325734	0.925962	2.68702	18.9191
248	-3441.16	3.83959	98.6	96.6	97.2	99	98.1	8.3	85	6.7	11.2	11.7	-0.162	-1.354	1.516	0.786317	1.01059	2.69786	24.1575
249	-3441.11	3.86394	98.6	95.9	97.9	99.8	98.2	9.4	83.1	5.7	12.3	10.9	-0.303	-1.33	1.6329	0.628914	0.926109	2.81514	19.3096
250	-3441.09	3.86285	98.9	96.3	97.6	99.7	97.4	11.2	80.1	6.2	14.4	10.4	-0.0846	-1.4609	1.5455	0.890521	0.960689	2.81609	18.571
251	-3441.21	3.89601	98.7	96.6	98.2	99.3	97.5	11.3	71.5	13.4	11.1	11.3	-0.2805	-1.5944	1.8749	0.700825	0.920362	3.27742	18.5758
252	-3441.09	3.9158	98.7	96.1	97.6	100.2	97.9	11.9	70.9	10.5	12.1	11.6	0.1599	1.5663	-1.7262	0.814788	0.865614	-3.09126	18.1785
253	-3441.11	3.90621	99.6	96.2	97.8	99.5	98.1	11.5	75.3	5.2	12	12.3	-0.1831	-1.2094	1.3925	0.737034	0.871159	2.45227	17.141
254	-3441.24	3.85566	99.7	96.3	97.3	99.7	97.6	10.4	76.6	9.7	12.5	13.6	-0.1292	-1.3719	1.5011	0.827865	0.920106	2.696	19.2825
255	-3441.17	3.89488	99	97	96.8	99.4	97.9	11.1	53.5	31.4	10.3	11.6	-0.2746	-1.5253	1.7999	0.694892	0.941621	3.14268	46.6272
256	-3441.26	3.82416	98.5	97.5	98	98.1	98.2	41.7	14.6	3.5	53.5	11	-1.2734	-1.6568	2.9303	0.130841	1.00177	4.76187	34.3616
257	-3441.18	3.85299	99.6	96	97.8	99	98	10.7	78.9	12.2	9.8	10.4	-0.2013	-1.5516	1.7529	0.770308	0.984831	3.10876	18.5984
258	-3441.21	3.8198	98	96	97.3	99.1	97.4	26.1	55.3	4.9	25.4	13.2	-0.0568	-1.7011	1.7578	0.935412	0.941319	3.23735	24.5093
259	-3441.13	3.85409	98.8	96.3	98	98.4	97.9	9.6	82	3.7	13.1	13.1	-0.3831	-1.5069	1.89	0.594561	0.963956	3.23808	18.7079
260	-3441.07	3.83853	98.9	97.5	96.7	99.1	98.1	18.8	15.7	53.6	22.7	11.9	-0.3241	-1.604	1.9281	0.6638	0.966493	3.34593	27.2458
261	-3441.11	3.84947	98.8	96.5	97.9	98.5	98	24.5	51.3	12.8	23.2	10.3	-0.5513	-1.6253	2.1766	0.493436	0.973132	3.66735	21.22
262	-3441.06	3.876	99.5	96.6	97.6	99.4	97.7	10.1	81.3	7.4	11.2	11.1	-0.2699	-1.4064	1.6762	0.678012	0.969714	2.91693	22.4553
263	-3441.19	3.83771	98.6	96.2	97.5	98.7	97.8	15.7	58.4	11.4	24.3	12.6	-0.7283	-1.1473	1.8756	0.223368	0.92836	3.06445	21.7674
264	-3441.18	3.85092	98.9	96.4	97.4	99.6	97.7	11	77	8.8	9.8	13.8	-0.1414	-1.2808	1.4222	0.801185	0.941974	2.53915	18.6052
265	-3441.11	3.84973	99	96.7	97.3	99.4	97.8	19.8	45.9	21.4	20.8	14.9	-0.2919	-1.5318	1.8237	0.679917	0.91011	3.17467	19.1467
266	-3441.21	3.89018	99	97	97.7	99.7	98.3	10.2	73.2	11.3	10.3	12	-0.0222	-1.4701	1.4922	0.970293	0.921077	2.77168	18.7272
267	-3441.18	3.8602	98	96.9	97.6	100.2	98.1	11.7	78.1	7.7	14.8	9.5	0.1724	1.4574	-1.6298	0.788403	0.995997	-2.90174	18.8344
268	-3441.07	3.8411	98.7	95.9	97.8	99.1	98.4	9.5	79.1	4.6	11.6	16.3	-0.1131	-1.2533	1.3664	0.834489	0.913587	2.45775	21.0209
269	-3441.18	3.88539	99.4	96.2	97.6	99.2	97.7	10.8	78.9	8.7	9.9	12.1	-0.2428	-1.3046	1.5474	0.686182	0.945338	2.69707	17.5196
270	-3441.18	3.86091	99	96.8	97.9	99.2	97.6	20.4	57.6	10	19.3	13	-0.4282	-1.6609	2.0891	0.590107	0.926234	3.57633	18.596
271	-3441.19	3.8149	98.3	97.1	97.4	98.5	98.2	25	36.8	17.9	31.9	11.5	-0.6996	-1.4464	2.146	0.348009	1.01079	3.54701	29.7602
272	-3441.09	3.85019	99.5	96.7	97.2	98.6	97.2	11.7	88.2	3.1	9.3	10	0.0944	1.3636	-1.4579	0.87054	0.977682	-2.64413	19.6158
273	-3441.18	3.82215	99	97.1	97.3	98.9	97.7	28.5	37.4	17.1	28.3	12.6	-1.1115	-1.2179	2.3294	0.045709	0.984073	3.77597	23.8897
274	-3441.2	3.83387	99.3	96.7	97.6	99.2	98	24.5	40.8	17.9	23.7	16	-0.6095	-1.7131	2.3226	0.475154	0.929034	3.90277	29.9092
275	-3441.11	3.8981	99.1	96.2	97.7	99.5	98	10	78.6	6.6	11.7	10	-0.0773	-1.6173	1.6946	0.908787	0.927376	3.10095	16.9231
276	-3441.12	3.86321	99.6	96.2	97.4	99.6	98.3	9.6	79.5	8.9	10.8	11.8	-0.1872	-1.3698	1.557	0.759535	0.971264	2.75504	18.8163
277	-3441.21	3.79144	98	96.4	97.4	98.9	97.8	49.4	16.6	6.5	42.7	11.5	-0.7666	-2.0513	2.8179	0.455885	0.95062	4.72176	29.0775
278	-3441.11	3.82139	98.2	96.8	97.2	98.9	98.5	26	40.1	13.6	29.7	14.9	-0.8854	-1.2108	2.0963	0.155231	0.967581	3.41048	26.2973
279	-3441.07	3.81288	99	96.2	98	98.1	98.6	33	39.1	3.8	36.5	12.1	-0.508	-1.8459	2.3539	0.568374	0.929597	4.01454	28.9927
280	-3441.17	3.88366	99.1	96.1	98	99.7	98.2	12.9	77.3	5.5	13.3	10.8	-0.0964	-1.4608	1.5572	0.876172	0.943697	2.82791	18.077
281	-3441.11	3.87579	98.7	96.2	97.5	99.5	98.3	13	73.1	11.1	10.8	10.3	-0.0895	-1.6127	1.7022	0.894841	0.944365	3.10474	23.072
282	-3441.22	3.87872	99.8	96.3	98.2	98.8	98.1	11.8	79.2	6	11.3	11.8	-0.1564	-1.5209	1.6773	0.813505	0.92133	3.0029	24.4379
283	-3441.09	3.83911	98.7	96.6	98.3	99.1	97.6	9.4	81.5	12.1	11	8.8	0.0611	1.3964	-1.4574	0.91622	1.0082	-2.67173	18.4252
284	-3441.17	3.89823	99.5	96.1	98	99.6	98.1	12.7	73.4	8.4	12.5	11.4	-0.0981	-1.3843	1.4824	0.867664	0.845383	2.68675	16.8699
285	-3441.15	3.86531	99.5	96.4	97.8	99.1	97.9	12.4	62.4	18.3	10.9	15.8	0.159	1.3585	-1.5175	0.790462	0.919598	-2.70302	17.7912
286	-3441.17	3.86802	99.5	96.2	97.3	98.3	98.3	9.7	78.2	11.1	8.8	11.6	-0.3291	-1.5454	1.8745	0.648872	1.00081	3.24367	25.8453
287	-3441.12	3.88187	99.7	96.4	97.8	99	97.3	11.3	75.2	7.7	11.1	14.2	-0.1212	-1.3111	1.4322	0.830817	0.887112	2.57405	17.4256
288	-3441.06	3.86253	99.1	97.4	97.1	100	98	8.3	29.8	54.4	11.9	16.1	0.12	1.5082	-1.6282	0.852611	1.00559	-2.94083	28.9821
289	-3441.14	3.86375	99.1	96	98.3	99.1	97.8	9.7	77.5	11.1	11	10.8	-0.2044	-1.6294	1.8338	0.777032	0.9004	3.25692	18.8742
290	-3441.23	3.88444	98.5	96.9	98	99.1	97.5	9.6	69.2	10.7	14.4	14.3	-0.1371	-1.4039	1.541	0.822088	0.991302	2.76403	18.5518
291	-3441.17	3.85913	99.2	96.6	97.6	99.5	98	12.6	75	9.5	11.5	12.8	-0.2274	-1.4455	1.6729	0.728135	0.978736	2.9407	18.2873
292	-3441.2	3.83594	99.1	95.8	97.7	99.7	97.8	23.9	59.9	9.3	17.9	13.2	-0.7286	-1.545	2.2735	0.359091	0.957714	3.76248	20.8142
293	-3441.12	3.8241	98.9	96.1	97.3	99.4	97.3	13.1	70.6	4	17.7	19.1	0.0818	1.6304	-1.7123	0.904433	0.852514	-3.13012	27.1026
294	-3441.07	3.88553	98.6	96.5	96.7	100.3	97.8	11.9	52.3	26.1	16.8	12.4	-0.2085	-1.4834	1.6918	0.753569	0.8751	2.98976	24.3203
295	-3441.06	3.87061	99.3	96.2	97.8	99.5	98	11.7	72.3	8.4	16.9	11.9	0.0659	1.6136	-1.6795	0.921478	0.855892	-3.08281	18.855
296	-3441.18	3.84566	99	96.6	97.3	98.6	97.8	11.8	80.5	7.4	10.9	11.3	-0.4449	-1.3448	1.7897	0.502789	0.989527	3.0199	38.6801
297	-3441.07	3.88165	99.8	96.3	97.9	98.7	98.2	11.6	83.5	3.2	10.1	11.6	-0.1358	-1.5005	1.6364	0.834	0.92515	2.94303	19.0431
298	-3441.13	3.86672	99.3	96.8	97.8	99.7	98.1	12.7	73.4	8.5	14.8	10.8	-0.2984	-1.517	1.8155	0.671257	0.995992	3.15506	18.2077
299	-3441.16	3.84095	98.8	96.5	97.6	99	97.9	16.2	70	11.2	15.6	11.1	-0.7657	-1.2087	1.9743	0.22438	0.991514	3.22607	21.3751
300	-3441.2	3.84136	99	96.2	97.7	99.1	97.8	13.4	63.5	14.9	18	14.5	-0.4028	-1.004	1.4068	0.427401	0.857708	2.34799	21.0756
301	-3441.09	3.86009	98.8	96.1	97.8	99.7	97.5	11	73	13	14.6	10	-0.001	-1.3446	1.3455	0.998558	0.915931	2.51679	17.9967
302	-3441.19	3.86715	99	96.9	97.6	98.9	97.8	9.1	78.6	9.5	11	12.9	-0.3144	-1.3604	1.6749	0.62453	0.926419	2.8851	19.0339
303	-3441.11	3.78656	97.5	97	97.2	98.2	98.1	55.9	3.7	4.6	51.1	11.4	-1.1657	-1.7161	2.8817	0.191004	0.991811	4.69803	28.4171
304	-3441.15	3.86684	99.3	96.5	97.3	99.2	98.3	15.4	70.1	14.1	11.7	9.1	-0.1873	-1.7088	1.8961	0.802428	0.958991	3.3863	20.504
305	-3441.14	3.87702	99.7	96.8	97.9	99.2	98.1	9.8	86	4.5	10.2	8.8	-0.0239	-1.6382	1.6621	0.971256	1.00116	3.08788	19.1968
306	-3441.1	3.867	99.9	96.2	97.5	99.6	98.1	10.6	84.2	4.3	10.8	11	0.0276	1.5715	-1.5992	0.965429	0.962599	-2.96677	21.4026
307	-3441.13	3.87092	99	97.1	97.1	100	97.6	11.7	38.4	42.3	12.1	15.3	0.1433	1.2154	-1.3587	0.789068	0.926395	-2.41937	29.7358
308	-3441.21	3.84462	98.8	97.2	97.9	98.5	98.3	20.1	58.6	4.4	23.1	16.1	-0.0302	-1.7637	1.7939	0.966303	1.02424	3.32872	19.8512
309	-3441.12	3.85139	99.5	96.4	97.5	100	98	14.3	72.9	11.2	12.3	11.7	-0.2665	-1.3115	1.578	0.662221	0.971645	2.73759	21.1656
310	-3440.94	3.86565	99.3	96.4	98	99.4	98	9.8	82.9	7.6	11.5	9	0.085	1.6158	-1.7008	0.900075	0.981504	-3.10599	18.9584
311	-3441.1	3.85531	99.1	96.3	98.3	99.4	97.7	9.5	77.3	8	15.7	9.8	0.5124	1.4195	-1.9318	0.46954	1.00024	-3.24344	21.6576
312	-3441.18	3.87641	99.2	96.2	97.3	99.4	97.5	11.1	74.2	9.7	13.2	12	-0.0975	-1.6656	1.7631	0.889362	0.926112	3.21161	18.7031
313	-3441.18	3.85651	98.8	97.1	97.7	98.8	97.8	24.8	45.5	4.8	31.7	14.4	-0.1515	-1.8331	1.9845	0.847368	0.974357	3.58005	29.6478
314	-3441.06	3.86752	99.1	96.4	97.4	99.2	97.6	12.5	71.3	7.2	14.4	14.1	-0.2489	-1.4217	1.6706	0.70207	0.951831	2.92105	18.334
315	-3441.15	3.86869	98	96.9	98	99.5	98.4	24.8	59.5	7.9	16.9	10.5	-0.42	-1.5667	1.9867	0.577182	0.95594	3.39338	21.3791
316	-3441.16	3.86723	98.8	96.7	97.5	99.3	98.5	8.4	75.8	13.4	11.5	11.1	-0.3899	-1.1129	1.5028	0.481144	0.940976	2.52745	18.2998
317	-3441.19	3.86346	99.9	97	97.7	99.6	97.2	11.3	81.5	10.1	10.4	8.3	0.0555	1.292	-1.3474	0.917664	0.991018	-2.47097	16.6389
318	-3441.22	3.85638	99.5	96.1	97.5	99	98.2	11.3	72.6	10	11.7	15.1	-0.0093	-1.3004	1.3097	0.985837	0.8596	2.44197	18.6507
319	-3441.1	3.83229	98.8	97	97.6	98.7	98.2	28.9	55.6	13.1	14.8	11.2	-0.6087	-1.2705	1.8792	0.352188	0.953892	3.10745	20.3682
320	-3441.18	3.86447	99.2	96.2	97.1	99.8	98.3	10.6	80.5	4.6	12.7	13	0.0755	1.2955	-1.371	0.889815	0.898397	-2.49764	18.8031
321	-3441.14	3.81236	97.9	97.3	97.6	98.6	97.9	52.1	4.2	12.5	44.7	10.4	-1.1269	-1.6319	2.7588	0.183042	1.03707	4.49543	28.4311
322	-3441.16	3.82014	98.4	97.4	97.7	98.3	98.3	31.1	36.7	3.6	41.4	11.1	-0.2807	-1.8411	2.1218	0.735422	1.01959	3.7353	45.1668
323	-3441.17	3.84377	98.5	96.6	97.4	99.6	97.9	18.3	63	7.9	19.5	14.7	-0.678	-1.2776	1.9556	0.306583	0.955845	3.21818	20.9658
324	-3441.08	3.84817	98.9	96.6	97.4	98.8	97.4	9.7	84.8	3.6	10	12.4	-0.1236	-1.2288	1.3523	0.817261	0.935107	2.42311	18.4908
325	-3441.23	3.84603	98.3	96.6	97.8	99.4	98	8.5	75.7	18.9	9.1	8.9	-0.4756	-1.1764	1.652	0.424222	1.03087	2.75612	21.7669
326	-3441.21	3.84824	99	96.7	97.4	98.9	98.5	11.4	72.3	12.9	12	12.7	-0.6024	-1.1873	1.7897	0.326776	0.970233	2.95124	21.5375
327	-3441.15	3.88398	99.3	96.2	97.4	99.6	97.8	9.3	83.4	3.3	11.8	11.7	-0.2469	-1.6375	1.8844	0.737958	0.951058	3.31919	29.5403
328	-3441.13	3.84655	99.3	96.2	97.7	98.7	98	15.2	71.7	6.5	17.6	11.8	-0.2703	-1.5315	1.8018	0.699942	0.943208	3.1492	21.6505
329	-3441.04	3.85377	98.8	96.2	97.6	99.4	97.5	11.7	59.1	26.4	13.6	11.1	0.1782	1.4743	-1.6525	0.784314	0.954696	-2.93949	27.5778
330	-3441.15	3.82821	99.1	96.4	97.1	98.6	97.5	18.1	65.2	12.4	17.6	10.4	-0.3917	-1.2789	1.6706	0.531088	0.984463	2.8315	22.4644
331	-3441.13	3.90281	98.9	96.6	98	99.2	98.5	11.5	72.7	11.1	11.9	10.8	-0.1388	-1.2535	1.3923	0.800639	0.93824	2.48552	17.7085
332	-3441.14	3.85309	98	96.6	97.4	99.7	98.4	25.6	59.5	4.8	20	11	-0.4845	-1.6816	2.166	0.552672	0.993233	3.68429	22.2509
333	-3441.15	3.87028	99	96.7	97.4	99.9	97.7	13.3	60.7	19.8	13.3	13.4	-0.1317	-1.666	1.7977	0.853472	0.875538	3.24747	18.8364
334	-3441.14	3.88557	99.6	96.3	97.8	99.3	98	11	74.4	8.9	12.5	12.6	0.1293	1.5065	-1.6359	0.841883	0.904689	-2.94737	17.5393
335	-3441.11	3.89417	99.1	97.3	96.6	99.9	98	10.1	10.8	73.1	13.2	11.5	0.0691	1.3219	-1.391	0.900686	0.87982	-2.5406	30.6149
336	-3441.15	3.86704	99.1	96.4	97.8	99.4	97.8	10.2	77.9	5.1	10.4	17.2	-0.1398	-1.4693	1.6091	0.826212	0.923446	2.88891	18.2901
337	-3441.09	3.84435	99.3	96.4	96.8	98.8	97.9	14.8	60.8	21.3	12.3	13.6	-0.7415	-1.132	1.8734	0.208451	0.896431	3.05772	22.0696
338	-3441.2	3.82583	98.1	96.5	97.5	99.1	97.9	39.2	10.7	27.6	35.9	11.2	-1.2521	-1.4798	2.7319	0.083323	0.932482	4.43201	78.4362
339	-3441.18	3.85121	99.1	96.3	96.7	99.2	98.2	8.7	85.9	3.8	9.4	13.8	-0.6132	-1.2198	1.833	0.330938	0.990746	3.02409	34.5612
340	-3441.06	3.87333	99.1	96.3	97.5	99.6	98.4	10.3	66.8	18.2	11.9	13.7	-0.1082	-1.368	1.4762	0.853367	0.897237	2.66675	17.4695
341	-3441.08	3.84636	98.4	96.4	97.1	99.6	98.4	11.4	79.7	6.3	13.3	11.9	-0.2944	-1.2308	1.5253	0.613921	0.927058	2.62232	18.6293
342	-3441	3.85674	99.7	96.4	97.7	98.9	97.8	24.7	59.3	4.9	22	10.4	-0.2969	-1.7471	2.044	0.709476	0.966424	3.57932	17.231
343	-3441.13	3.85939	98.9	96.4	97.5	99.7	97.8	9.5	74.5	13.9	9.4	12.9	-0.3085	-1.1477	1.4563	0.576256	0.969052	2.48697	18.9369
344	-3441.11	3.87429	99.8	96.6	97.4	98.7	97.4	12.7	77	5.7	13.5	12.3	0.3217	1.2706	-1.5924	0.595912	0.893589	-2.72879	18.6942
345	-3441.11	3.86594	99	96.2	97.5	98.7	98.6	10.5	83	5	9.3	10.5	-0.4366	-1.319	1.7556	0.50261	1.00404	2.96225	20.8726
346	-3441.18	3.85286	99.6	96.3	98	98.5	97.7	20.9	71.9	4.9	14.3	9.8	-0.3038	-1.6687	1.9725	0.69193	0.982264	3.44201	19.3985
347	-3441.11	3.87842	98.4	96.4	97.4	99.6	97.7	10.4	65.7	15	17.2	11.6	-0.3741	-1.3556	1.7297	0.567412	0.912871	2.94947	18.6747
348	-3441.25	3.82268	98.6	96.6	97	99	97.5	27.1	46.2	4.4	34.7	12	-0.7036	-1.6471	2.3507	0.401389	0.944316	3.91012	39.514
349	-3441.17	3.86542	99	96.1	97.7	98.8	98.1	17.6	72.7	4.1	15.9	9.9	-0.234	-1.6787	1.9127	0.755324	1.00378	3.38132	24.292
350	-3441.16	3.88532	99.3	96.4	97.9	99.4	97.7	10.9	81.5	5.9	11	10.5	0.0727	1.622	-1.6947	0.914162	0.921688	-3.10523	16.9572
351	-3441.18	3.85842	98.5	96.4	97.6	99.1	97.8	9.7	72.5	13.1	14.5	10.4	0.0181	1.2727	-1.2908	0.97193	0.926948	-2.39857	18.4216
352	-3441.07	3.84223	98.9	96.3	97.8	99.2	97.7	10.9	72.6	12.2	10	16.5	-0.3538	-1.1388	1.4926	0.525957	0.967752	2.52773	18.3583
353	-3441.18	3.85495	99.6	96.6	97.3	99.3	98.2	10.7	79.6	9.6	9.8	12.2	-0.0078	-1.481	1.4888	0.989515	0.970075	2.77856	19.6788
354	-3441.06	3.85649	98.9	96.4	97.6	99.3	97.7	10.2	88.7	3.3	9.6	8.9	-0.0889	-1.4282	1.5171	0.882817	1.01218	2.75936	26.4536
355	-3441.15	3.83344	98.6	96.5	97.4	98.5	97.9	15.4	57.9	11.3	25.3	15.4	-0.5184	-1.3572	1.8756	0.447223	0.896898	3.13896	21.4913
356	-3441.07	3.86188	99.4	96	97.8	99.7	98	11.3	79.3	6.2	12.5	12.1	-0.5208	-1.3744	1.8951	0.45041	0.984886	3.1731	23.7774
357	-3440.93	3.86639	99	96.4	98.1	98.9	98.5	10.7	75.1	13	9.8	10.7	-0.3107	-1.4278	1.7385	0.642546	0.961828	3.00469	23.8813
358	-3441.09	3.84832	98.6	96.1	97.6	99.4	98	12.5	76.9	7.9	10.6	14.5	-0.1368	-1.2299	1.3666	0.799868	0.925872	2.43932	21.0948
359	-3441.16	3.90278	100	96.1	97.6	99.5	97.9	11.3	72.4	12.1	10.8	12.1	0.0302	1.5256	-1.5559	0.961117	0.887968	-2.88335	17.3081
360	-3441.17	3.91011	98.8	96.2	97.6	100.3	97.9	8.9	76.5	8.2	12.9	10.9	0.0239	1.6344	-1.6583	0.97117	0.902588	-3.08075	17.112
361	-3441.15	3.8169	98.8	96.8	97.2	98.1	97.6	36.9	27.3	11	37.3	12.8	-1.092	-1.2644	2.3564	0.073171	0.944562	3.82187	28.2495
362	-3441.19	3.8913	98.2	96.5	97.5	99.6	98	8.8	69.1	16.4	12.9	11.9	0.0117	1.8519	-1.8636	0.987464	0.885979	-3.47621	21.5486
363	-3441.07	3.86517	99	96.1	97.4	99.2	98	9.9	66.3	21.5	10.6	12.6	-0.3313	-1.471	1.8023	0.632332	0.93646	3.10912	21.4653
364	-3441.19	3.87041	99.3	96.5	97	99.6	97.4	10.4	53	35.7	12.2	8.7	0.3959	1.0835	-1.4794	0.464794	0.922469	-2.48215	27.518
365	-3441.11	3.89208	99.2	96.8	97.8	100.2	97.4	10.3	74.4	8.8	11.5	13.5	0.3503	1.505	-1.8553	0.622343	0.934528	-3.19468	17.6579
366	-3441.13	3.87023	99.1	96.3	98.1	99.7	97.5	11.5	76.4	7.4	11.7	13.9	-0.0185	-1.3064	1.3249	0.972038	0.884509	2.46194	17.4572
367	-3441.22	3.88242	99.4	96.7	98.1	99.2	98	10.5	78.6	8.4	10.9	11.3	0.0091	1.3333	-1.3424	0.986493	0.93869	-2.50328	14.9425
368	-3441.19	3.83565	98.1	96.4	97.7	99.6	97.7	21.6	64.3	4.5	19.9	13.5	-0.2736	-1.605	1.8786	0.708725	0.888798	3.28912	20.0972
369	-3441.17	3.89785	98.8	96.6	98.1	99.3	97.8	10.6	72.9	10.2	11.5	13.1	-0.2732	-1.434	1.7073	0.679933	0.867716	2.97207	17.6742
370	-3441.16	3.84608	98.1	96.9	97.9	99.2	97.9	12.1	74.2	14.4	11.1	10.2	-0.0296	-1.1162	1.1459	0.948296	0.937818	2.11691	18.4876
371	-3441.19	3.86069	99.7	96.7	97.8	99.2	98.2	11.1	79.7	7.5	11.9	12.2	-0.3711	-1.2671	1.6382	0.546924	0.930678	2.78389	17.4295
372	-3441.22	3.83905	98.2	96	97.7	99.5	98.4	8	85.2	6.4	12.3	11.3	-0.5192	-0.894	1.4133	0.265183	0.944082	2.31679	21.1745
373	-3441.26	3.86904	99.1	97	97.6	99.7	97	10.2	64.3	17.1	12.8	16.1	0.2142	1.5844	-1.7986	0.761848	0.926486	-3.18398	17.8102
374	-3441.13	3.87005	99.1	96.5	97.6	100.1	97.6	11.8	75.9	8.3	15	9.7	-0.1012	-1.5326	1.6339	0.876072	0.979227	2.96704	20.0012
375	-3441.09	3.83977	98.4	96.8	97.8	99.7	97.7	16	64.2	8.2	23.3	10.8	-0.4868	-1.4173	1.904	0.488701	0.958969	3.20584	21.4871
376	-3441.15	3.82995	98.9	97.7	98.1	98.8	98.6	50.4	6.6	2.8	53	10.5	-1.301	-1.413	2.714	0.041286	1.11041	4.39919	29.8233
377	-3441.17	3.90304	99.6	96.2	97.7	98.9	98.4	11.1	73.7	9.8	10.5	13	-0.0262	-1.6431	1.6692	0.968655	0.872335	3.09917	17.1365
378	-3441.14	3.85249	99.1	96	96.9	99.9	97.7	10.6	77.2	9.7	9.2	15.8	-0.6167	-1.1937	1.8103	0.318714	0.934082	2.98282	18.7278
379	-3441.18	3.85805	99.1	96.9	96.9	98.8	98	15.2	57	21.7	13.5	14.7	-0.3506	-1.3012	1.6518	0.575465	0.98314	2.82047	23.6731
380	-3441.14	3.88097	99.2	96.2	97.9	98.8	97.9	10.1	80.4	5.3	10.7	13.4	-0.4523	-1.2115	1.6638	0.456318	0.911254	2.78815	17.1689
381	-3441.2	3.85919	99.3	96.5	97.9	99.2	97.9	10	84.8	4.6	12	10.9	-0.1815	-1.3897	1.5713	0.768949	0.932441	2.7858	19.4355
382	-3441.15	3.89505	99.8	96.7	97.2	99.7	97.6	10.7	80.2	5.5	11.7	10.8	0.2488	1.3213	-1.5701	0.68309	0.915076	-2.73506	24.2713
383	-3441.2	3.84339	99.2	96.8	98.3	98.8	97.9	14.1	73.4	10.8	13.1	10.2	-0.4605	-1.3448	1.8053	0.489826	0.987325	3.04005	31.3516
384	-3441.21	3.85129	98.7	96.3	97.6	99.4	98.6	10.3	73.4	15	12.9	10.9	-0.4906	-1.3191	1.8097	0.457806	0.978189	3.03327	21.797
385	-3441.1	3.92767	99.3	96.5	97.6	100.3	98.2	10.8	69	9	13.6	13.7	0.1389	1.2092	-1.3481	0.793954	0.834118	-2.40311	20.5799
386	-3441.18	3.81355	98.2	96.5	97.4	98.8	98.6	48.5	16.9	5.2	43	12.3	-1.0026	-1.5153	2.5179	0.203645	1.04616	4.10821	29.312
387	-3441.22	3.83599	99.2	96	97.2	98.5	98.5	17.5	57.8	12	23.1	12.8	-0.7545	-1.1834	1.9379	0.221282	0.963164	3.16582	20.4378
388	-3441.03	3.86141	100	96	98.1	99.1	97.5	10.8	69.6	15.3	10.6	14.7	0.23	1.4753	-1.7053	0.730254	0.933084	-2.99889	24.5943
389	-3441.21	3.85971	98.8	96.2	97.4	99.7	97.6	8.9	79.5	4.6	12.7	15.3	0.019	1.5773	-1.5963	0.976254	0.937277	-2.96926	21.824
390	-3441.13	3.88172	98.9	96.5	97.5	99.5	97.8	19.4	45.1	25.8	20.5	10	-0.1759	-2.0612	2.2371	0.842736	0.898747	4.03136	20.0669
391	-3441.24	3.84884	98.5	96.5	97.9	99.5	97.8	9.3	84.1	5.3	12.6	11.3	-0.3117	-1.1619	1.4735	0.576988	0.977441	2.51681	19.6615
392	-3441.11	3.87747	99.4	96.4	97.7	99.3	97.9	12.1	74.1	12.3	11.3	9.3	0.0806	1.6741	-1.7547	0.908096	0.950987	-3.21051	19.1433
393	-3441.17	3.92676	99.3	96.3	98.1	99.1	98.4	10.7	69.5	13	11.4	10.9	-0.0824	-1.5825	1.6649	0.900979	0.915344	3.04108	20.8194
394	-3441.12	3.86377	99.5	96.6	97.4	99.3	97.9	10.7	69.2	20	11.4	10.7	-0.0333	-1.3948	1.4281	0.95337	0.930555	2.64155	17.1467
395	-3441.16	3.8687	98.7	96.6	97.7	99.8	97.8	11.5	65.1	9	18.5	15.6	-0.308	-1.344	1.652	0.627082	0.90764	2.84702	18.8314
396	-3441.03	3.85309	99.1	97.1	97	99.3	98.4	18.3	17.4	53.3	22.3	11.1	-0.5475	-1.5868	2.1344	0.486923	0.900532	3.59272	30.382
397	-3440.97	3.91858	99.3	96.1	97.6	99.3	98.1	11.7	72.2	7.6	11.7	13.3	0.1998	1.4856	-1.6854	0.762931	0.874319	-2.98424	18.3735
398	-3441.2	3.85666	99.3	97.1	98.4	98.6	97.7	20.8	61.4	3.4	24.3	10.5	-0.0236	-1.9477	1.9713	0.976071	1.02845	3.66663	18.6535
399	-3441.17	3.88814	99.3	96.3	97.6	99.6	97.9	10.1	75.8	6.3	11.2	15.5	-0.1407	-1.3447	1.4855	0.810537	0.877486	2.65765	15.7956
400	-3441.16	3.89402	99.8	96.9	97.8	99.9	97.7	11.1	70.1	14.2	11.6	11.6	0.2114	1.3425	-1.5539	0.72787	0.926317	-2.73136	20.7257
401	-3441.09	3.84445	98.5	96.8	97.5	99.1	98.1	22.9	61	6.7	21.4	10.6	-0.4969	-1.5654	2.0623	0.518121	0.95965	3.48824	17.8081
402	-3441.17	3.86524	99.4	96	97.3	99.7	97.4	12.3	79.1	6.7	12.5	11.8	-0.1994	-1.4806	1.68	0.762588	0.897059	2.97457	17.1019
403	-3441.07	3.85833	98.6	97	97.6	98.9	98.2	14.3	79.9	7.8	10.2	10.7	-0.3129	-1.36	1.673	0.625916	0.954153	2.88253	21.2896
404	-3441.21	3.85096	99.1	96.9	97.9	98.9	98.4	26.5	55.8	5.2	18.8	15.4	-0.4912	-1.5142	2.0054	0.510091	1.01234	3.38761	23.2148
405	-3441	3.86658	99.3	97.1	97.3	99.1	97.4	11	81.1	7.2	10.2	10.4	0.0658	1.415	-1.4807	0.911189	1.01942	-2.71123	19.4145
406	-3441.16	3.8485	98.9	96.9	97.8	100.2	97.8	16.1	67.5	9.2	18.5	9.9	-0.5063	-1.6459	2.1522	0.529534	0.976618	3.64687	21.9796
407	-3441.14	3.85652	99.2	96.5	97.5	99.3	98.1	11.6	70.2	19.9	10.4	11.1	-0.0902	-1.3364	1.4265	0.873606	0.931918	2.58902	17.7951
408	-3441.05	3.89397	98.9	96.6	97.8	99.5	98.2	9.5	73.3	11.9	12.4	10.6	0.0341	1.4823	-1.5163	0.955028	0.897375	-2.80593	16.2276
409	-3441.16	3.85342	98.7	96.4	98.1	99	98.3	10.9	72.6	12.2	9.9	16.2	-0.5248	-1.1548	1.6797	0.375067	0.988676	2.78491	17.993
410	-3441.1	3.85697	99.2	96.8	97.2	99.6	97.5	10	73.2	16.2	12.5	9.9	-0.0224	-1.3949	1.4173	0.968391	0.982076	2.63123	18.4257
411	-3441.17	3.85916	99.7	96.3	97.5	99.5	97.9	11.2	82.5	7	10.6	9.8	-0.4339	-1.3503	1.7842	0.513646	0.971169	3.01559	18.6954
412	-3441.21	3.84096	98.5	96.5	97.8	98.7	97.8	14.1	73.1	7.7	17.4	8.9	-0.3778	-1.6967	2.0745	0.635755	1.01608	3.581	37.6718
413	-3441.21	3.83649	98.8	96.7	97.6	99.3	97.6	33.7	50.5	7.2	19	13.2	-0.7411	-1.4192	2.1602	0.313902	0.996948	3.55755	27.0163
414	-3441.13	3.8754	98.2	96.7	97.6	99.2	97.2	9.3	82.6	4.1	10.5	12.8	-0.0823	-1.4915	1.5738	0.895412	0.944404	2.87097	17.908
415	-3440.99	3.87905	99.8	96.5	97	99.1	98.1	10.3	74.6	12.1	11.2	11.3	0.1337	1.2964	-1.4301	0.813	0.880417	-2.56006	21.0645
416	-3441.12	3.88853	99	96	97.9	99.4	98.2	9.6	81.5	3.7	12.5	12.5	-0.2098	-1.5184	1.7282	0.757171	0.901797	3.05632	18.6531
417	-3441.1	3.83283	98.6	96.4	97.5	99.4	98.1	26.6	57.2	6.9	20.4	11.9	-0.6832	-1.4047	2.0879	0.34556	0.998998	3.45	21.5556
418	-3441.16	3.8662	98.8	96.4	97.5	99.7	98.5	8.5	71.5	13.5	10.6	16.3	-0.1013	-1.5419	1.6432	0.876737	0.957275	2.98434	23.6126
419	-3441.22	3.83388	99.2	96.9	97.2	98.9	97.3	9.8	77.8	4.8	10.9	19.5	-0.5298	-0.9441	1.4739	0.281029	0.931027	2.41962	18.267
420	-3441.13	3.89246	99.2	96.6	98.2	100	97.4	13.4	77.4	2.7	13.9	11.6	0.2771	1.5426	-1.8197	0.695423	0.905054	-3.17747	22.5179
421	-3441.11	3.87111	99	96.6	97.5	99.5	98.4	11.1	78.1	9.5	10.8	11	-0.1741	-1.1693	1.3435	0.740752	0.933319	2.36778	15.3597
422	-3441.15	3.86438	98.8	96.6	97.2	99.3	97.4	9.7	75.3	12.8	10.3	12.5	-0.1652	-1.3556	1.5207	0.782792	0.965233	2.70424	18.9433
423	-3441.2	3.86323	98.8	95.9	97.4	99.1	98.1	11.6	75.9	12.2	11.3	10.9	-0.5079	-1.3382	1.8461	0.449751	0.962856	3.09068	18.93
424	-3441.22	3.85961	97.9	96.6	97.9	99.3	98.4	20.7	70.5	5.9	14.8	10.1	-0.2572	-1.5546	1.8118	0.716054	1.00008	3.17693	17.8137
425	-3441.13	3.78502	98.1	96.5	97.2	98.3	97.6	46.9	7	23.3	36.5	14.2	-0.6524	-1.5761	2.2285	0.414512	0.939732	3.71315	29.859
426	-3441.23	3.88198	99.3	96.9	98.1	99.6	97.7	11.6	73	12.7	11.5	10.9	0.3397	1.3905	-1.7302	0.607368	0.90888	-2.97112	18.8771
427	-3441.12	3.87441	98.9	96.6	97.2	99.5	98.4	13	59.2	25.8	9.8	11.6	0.0303	1.279	-1.3093	0.95371	0.921067	-2.422	17.4103
428	-3441.17	3.89349	98.9	96.7	98	99.5	97.7	11.7	73.6	8.8	14.1	11	0.0274	1.2222	-1.2495	0.956203	0.864071	-2.31288	17.2993
429	-3441.11	3.85644	98.3	96.1	97.8	99.3	98.1	11.2	76	11.2	13.4	10.2	-0.338	-1.2794	1.6174	0.582001	1.00049	2.76499	21.4686
430	-3441.12	3.85591	98.6	96.6	97.8	99.2	98	11.6	82.3	5.9	11.3	9.4	-0.2521	-1.5584	1.8105	0.721563	1.02346	3.17821	21.3541
431	-3441.09	3.84761	98.3	97.9	97	99.5	97.8	31.9	8.5	44.6	26.5	11.6	-0.7333	-1.4769	2.2101	0.336465	0.929278	3.64836	40.9651
432	-3441.1	3.82889	98.4	96.5	97.7	99.5	98.3	7.2	81.6	7	11.9	14.4	-0.2003	-1.3818	1.5822	0.746759	1.02418	2.79195	21.3099
433	-3441.05	3.84237	98.7	96.3	97.5	99.6	98.3	8.9	79.5	13.7	11.3	10.3	-0.1976	-1.1629	1.3606	0.709473	0.977582	2.38249	18.6336
434	-3441.17	3.89436	98.9	96.3	97.5	100.3	97.8	10.4	75.3	8.5	12.7	13.3	0.2493	1.2618	-1.5111	0.670024	0.852137	-2.62554	17.4337
435	-3441.19	3.87452	98.6	96.4	97.4	99.7	98	15.7	70.4	4.4	17	12.7	-0.0519	-1.5174	1.5693	0.933874	0.885279	2.88899	18.6093
436	-3441.12	3.8514	99.5	96.1	97.8	99.4	97.4	11.8	80.5	5	11.6	12.8	0.1657	1.3007	-1.4664	0.774042	0.878438	-2.60265	20.0016
437	-3441.15	3.88285	99.3	96.8	96.8	99.7	98.4	10.3	51.2	33.8	11.9	11.7	-0.0671	-1.7067	1.7737	0.92437	0.88822	3.25795	50.3672
438	-3441.1	3.84936	98.7	96.3	97.6	98.5	98	16.4	71.8	3.5	18.7	10.5	0.289	1.6028	-1.8917	0.694475	0.898059	-3.30271	21.8696
439	-3441.18	3.85935	98.8	96.8	98	99.1	98.5	20.4	66.2	4.5	17.8	13.3	0.1987	1.757	-1.9557	0.796785	0.941557	-3.48833	27.5826
440	-3441.05	3.85293	99	96.9	97.6	98.6	97.8	22.9	71.3	6.4	9.1	11.6	-0.4579	-1.2463	1.7042	0.462619	0.919712	2.8583	24.6371
441	-3441.1	3.83561	98.7	96.6	97.1	98.2	97.6	26	42.6	11.3	31.5	11.4	-0.8174	-1.4896	2.307	0.29134	0.992546	3.79093	21.4875
442	-3441.2	3.86903	98.9	96.3	98	99.3	97.7	10	86.9	3.7	10.6	10.1	-0.2305	-1.4181	1.6486	0.720359	1.00426	2.89327	19.0909
443	-3441.16	3.87483	99.2	96.1	97.7	99.2	98.2	9.2	85.4	3.8	11.3	10.7	-0.1392	-1.4587	1.5979	0.82576	0.962775	2.86852	21.3939
444	-3441.12	3.85666	98.9	96.9	97.3	99.6	98.2	11.8	77.4	7.5	14.4	10.7	-0.2903	-1.4397	1.7301	0.664365	1.01932	3.00262	18.2513
445	-3441.08	3.83669	99.3	95.9	97.1	99.1	97.5	11.6	82	4.1	12.2	12.4	0.2265	1.2056	-1.4322	0.683647	0.881975	-2.49496	18.7581
446	-3441.15	3.86617	98.8	96.2	98.3	99.3	98.5	7.5	87.4	3.7	12	9.1	-0.2428	-1.5971	1.8398	0.736107	1.00907	3.2394	15.7962
447	-3441.11	3.80117	98.1	96.9	97.4	98.8	98.6	51.9	5.5	11.1	46.9	10.9	-1.2407	-1.6441	2.8848	0.139837	1.0128	4.68986	43.8652
448	-3441.17	3.873	99	95.7	97.4	98.7	97.7	12.3	78.1	5.5	11.6	14.6	-0.5761	-1.2509	1.827	0.369338	0.860736	3.02719	21.1714
449	-3441.24	3.83509	98.8	96.2	97	99.2	97.8	14	76.5	5.5	15.9	11.7	-0.1836	-1.2991	1.4827	0.752394	0.965449	2.61953	18.5021
450	-3441.17	3.87708	99.7	96.5	97.3	98.5	97.8	12.4	65.5	21.7	9.5	12.9	-0.3441	-1.4646	1.8087	0.619483	0.890839	3.11278	18.8131
451	-3441.19	3.83844	98.1	96.8	97.9	99	97.7	16.3	56.5	14.3	21.2	13.6	0.6824	1.379	-2.0614	0.337912	1.01634	-3.4034	27.2081
452	-3441.17	3.87452	98.8	96.6	97.5	99	97.7	11.5	73.5	14	10.7	10.4	-0.0649	-1.4097	1.4747	0.911932	0.96531	2.70061	18.356
453	-3441.11	3.85089	98.9	96.5	97.7	98.7	98.2	12.6	75.9	5.2	11.7	16.7	-0.36	-1.5727	1.9328	0.627428	0.915775	3.3311	18.4377
454	-3441.13	3.84974	98.5	96.9	98.4	99.6	98	9.4	85	6.2	10	9.6	-0.0967	-1.5709	1.6676	0.884008	1.03137	3.0339	18.0093
455	-3441.19	3.85688	98.7	96.3	97.6	99.2	98.1	15.3	71.6	7.9	13	12.7	-0.641	-1.3213	1.9624	0.346694	0.986663	3.24297	19.9641
456	-3441.17	3.87139	99.5	96.1	98.1	99.1	98	11.4	81.3	5.6	11.9	9.9	-0.0402	-1.4998	1.5401	0.947735	0.956774	2.84479	17.9045
457	-3441.11	3.87766	98.9	96.3	97.4	99.9	98	16.8	65.6	6.7	16.1	17.2	-0.2649	-1.323	1.5878	0.666381	0.848212	2.75686	16.7262
458	-3441.18	3.87634	99.2	96.1	97.8	100	98.1	9.4	80	4.6	13.3	12.5	0.1135	1.4479	-1.5614	0.854607	0.887025	-2.82144	16.9848
459	-3441	3.83454	98.2	97.4	98.1	99	98.3	15.8	65	10.6	10.7	19.7	-0.7356	-1.1537	1.8893	0.221278	1.01033	3.08638	30.2727
460	-3441.11	3.85956	98.6	96.6	98.3	100.3	98.1	8	87.4	5.9	11.2	8	-0.0838	-1.4544	1.5382	0.891103	1.07163	2.80303	18.5011
461	-3441.22	3.87863	99.3	97.2	98.3	99.6	97.7	10.3	75.3	4.1	12.5	16.4	-0.2416	-1.6929	1.9345	0.75018	0.943432	3.41613	18.2101
462	-3441.09	3.84303	98.8	96.3	97.5	99.7	98.1	8.6	86.7	4.7	12.5	10.3	-0.1001	-1.3944	1.4946	0.865993	0.985258	2.70772	17.8964
463	-3441.12	3.86723	98.9	96.3	98	99.6	98.4	11.1	74.5	11.2	12.4	10.1	-0.1653	-1.7588	1.924	0.828188	0.906583	3.45589	18.882
464	-3441.21	3.85178	98.9	96.5	97.7	99.2	98.2	25	51.7	3.8	28	12.1	-0.3427	-2.0945	2.4372	0.718786	0.871215	4.27596	30.2378
465	-3441.14	3.83955	98.7	96.8	97.4	99.2	98.5	12.3	79.3	7.3	13.5	10.4	-0.3249	-1.1876	1.5124	0.570419	1.01812	2.5803	19.2699
466	-3441.09	3.85634	99.1	96.4	97.4	99.3	97.7	10.8	70.8	8.4	11.6	17.4	0.2341	1.2538	-1.4878	0.685344	0.87339	-2.59284	16.5388
467	-3441.1	3.867	98.7	96.7	97.7	99.5	98	7.9	66.3	15.6	11.8	17.6	-0.3669	-1.5694	1.9363	0.621057	0.949463	3.33332	20.5901
468	-3441.2	3.82077	97.5	96.4	97	99.1	97.8	22.6	60.6	4.7	21	15	-0.2071	-1.6832	1.8903	0.78091	0.930964	3.36001	20.4209
469	-3441.17	3.84737	98.8	96.5	97.9	99.2	97.9	15.4	83.3	3.1	10.6	9	-0.2709	-1.5132	1.7842	0.696283	1.02092	3.11603	18.2753
470	-3441.09	3.86914	99.1	96.1	97.4	98.8	97.4	10.5	81.3	5.7	11.7	10.2	0.0128	1.3113	-1.3241	0.980662	0.930868	-2.46571	17.4236
471	-3441.22	3.849	98.6	95.8	97.3	99.5	97.8	9.7	79.8	8.7	10.7	14	-0.3615	-1.4449	1.8063	0.599756	0.907564	3.09761	23.1683
472	-3440.99	3.85554	99.6	97.1	97.4	99.4	98.3	8.6	49.7	38.5	13.4	10.1	-0.1369	-1.4761	1.613	0.830252	0.980961	2.89849	30.1715
473	-3441.18	3.85341	98.7	96.6	98	99.4	97.8	14.4	77	3.6	11.1	14.5	0.1372	1.5401	-1.6773	0.836371	0.972863	-3.01834	24.5846
474	-3440.88	3.84521	99.6	96.2	97.8	99	97.4	12.6	80.5	5.5	11.2	12.4	-0.2058	-1.3112	1.517	0.728669	0.925972	2.66693	24.0319
475	-3441.15	3.9029	99.2	96.5	97.7	99.7	98.1	11.1	79.7	4.9	12.1	9.8	0.3244	1.4213	-1.7458	0.628319	0.862143	-3.00933	21.5045
476	-3441.08	3.84528	99.4	96.5	97.5	99	97.2	12.6	69.7	17	12	13.1	-0.3397	-1.1522	1.4919	0.544623	0.892325	2.53416	20.7985
477	-3441.03	3.84484	98.7	96.3	97.5	98.1	98.3	13.1	83.6	5.7	10.4	10.1	-0.1601	-1.3018	1.4619	0.780903	0.940191	2.59859	18.3297
478	-3441.13	3.8598	98.8	96.6	97.4	99.8	98.7	9.2	68.6	22.4	9.7	10.5	-0.3738	-1.3776	1.7514	0.573152	1.0276	2.98944	23.8579
479	-3441.11	3.83913	98	96.4	97.2	99.3	98.5	19.2	57.3	10.1	24.9	11.6	-0.913	-1.2628	2.1758	0.160744	0.993267	3.54095	32.1063
480	-3441.16	3.85728	99	95.8	97.4	98.9	97.9	19.3	62.1	11.2	17.9	11.4	-0.4093	-1.5592	1.9685	0.584156	0.854939	3.36647	21.3765
481	-3441.19	3.84444	98.5	96.2	97.5	98.8	97.7	17.4	40.4	37.9	17.4	10.8	0.3686	1.481	-1.8496	0.601463	0.913901	-3.17272	36.6782
482	-3441.17	3.82199	99	96.3	97.3	98.9	98	19	58	11.6	22.9	12.8	-0.7791	-1.3038	2.0829	0.251889	0.941534	3.41081	40.8031
483	-3441.09	3.85508	99.3	96.8	97.2	99.4	97.5	13.4	76.7	4	9.9	16.3	-0.2544	-1.2694	1.5238	0.666136	0.921816	2.64551	18.8305
484	-3441.11	3.85475	98.7	96.8	97.6	99.5	98.1	17	57.7	16.8	12	18.8	-0.2798	-1.4683	1.7481	0.679923	0.953917	3.04315	21.6358
485	-3441.13	3.80769	98.1	96.8	97.7	98.4	98.2	39.8	31.6	6.1	37.8	10.3	-0.9566	-1.5437	2.5003	0.234794	1.00567	4.08866	19.626
486	-3441.19	3.85709	99.1	96	97.9	99.5	97.9	12.5	79.4	4.8	12.5	12.3	-0.1702	-1.3668	1.5369	0.778546	0.887028	2.73055	18.4402
487	-3441.13	3.87284	99.1	96.8	97.8	99	97.6	17.7	72.3	4.9	12.7	13.1	0.0078	1.6078	-1.6156	0.99031	0.960761	-3.01568	27.0792
488	-3441.22	3.87137	98.7	96.7	97.9	99.2	97.7	15.5	69.7	11.8	11.5	10.2	-0.2193	-1.616	1.8353	0.760999	0.95598	3.24843	19.2404
489	-3441.16	3.8858	98.9	96.9	98.2	99.6	97.5	12.2	71.1	10.5	13.1	12.2	0.0924	1.5999	-1.6923	0.890773	0.920058	-3.08374	18.5131
490	-3441.12	3.84334	98.9	96.1	98.3	98.9	98	10.2	84	5.3	12.1	10.9	-0.243	-1.3283	1.5713	0.690754	0.997854	2.74124	17.2031
491	-3441.17	3.85603	99.1	96.2	97.4	99	97.4	12.9	74.6	9.8	13.2	11	-0.4781	-1.3971	1.8752	0.490057	0.932269	3.15801	19.0044
492	-3441.12	3.87964	99.5	96	97.6	99.8	97.9	12.8	73.7	10	10.4	12.8	-0.2759	-1.0689	1.3449	0.589625	0.905133	2.30209	14.7825
493	-3441.12	3.86157	99.5	97.1	97.4	99.3	97.9	15	61.2	16.7	14.1	14	-0.5667	-1.1574	1.7241	0.342582	0.932878	2.84798	21.8749
494	-3441.26	3.88732	99	96.3	98.5	99.2	98.4	10.1	75.9	7.8	11.4	14.9	-0.1459	-1.1853	1.3312	0.78085	0.914666	2.36625	16.3231
495	-3441.2	3.85892	99.4	95.9	97.3	98.9	98.1	11.4	82.3	7	9.7	10.9	-0.4559	-1.4594	1.9152	0.52396	0.96995	3.24243	16.8042
496	-3441.15	3.84047	99.2	96.3	97.7	99.5	97.5	25.7	57.5	5.8	23	11.3	-0.3091	-1.8175	2.1266	0.709323	0.968858	3.72383	21.383
497	-3441.1	3.88271	98.8	96.1	98.1	99.5	97.7	9.8	73.8	9.8	12.7	12.8	-0.2031	-1.3396	1.5427	0.73673	0.889918	2.7166	18.2835
498	-3441.18	3.89927	99	96.7	97.9	98.9	98.6	9.4	73.7	12.4	10.1	10.9	-0.3202	-1.3481	1.6683	0.616123	0.960077	2.86931	18.5801
499	-3441.04	3.93664	99.2	97	99	99.2	98.2	16.9	56.6	11.9	16.6	11.3	-0.2321	-1.68	1.9121	0.757266	0.871626	3.38159	15.3256
500	-3441.09	3.79609	98	96.7	96.9	98.9	97.8	38.5	34.7	14.8	25.9	12.8	-0.9227	-1.3935	2.3163	0.203248	0.899612	3.77915	34.4613
501	-3441.11	3.84672	99.5	96.1	97.4	99.5	97.1	12.2	71.1	11.5	12.7	15.5	-0.194	-1.5167	1.7107	0.773169	0.937274	3.0357	18.2555
502	-3441.2	3.86722	99.1	96.7	97.5	99	97.6	9.8	86.2	4.7	9.8	9.2	0.0332	1.5317	-1.5649	0.957514	1.00943	-2.89757	23.3046
503	-3441.12	3.82839	99	96.9	97.4	99.6	98.1	15.8	79.4	6.5	10.6	10.5	-0.4202	-1.1241	1.5444	0.45577	0.968786	2.58773	18.4419
504	-3441.17	3.86162	99.1	97	97.8	99.3	98.4	17.4	55.7	12	19.8	15.2	-0.5259	-1.4058	1.9316	0.455516	1.00755	3.23657	21.1471
505	-3441.19	3.8669	98.8	96.3	97.8	98.7	97.9	14.4	61.4	19.8	15.3	9.4	-0.2753	-1.5419	1.8172	0.697049	1.00904	3.17411	31.6005
506	-3441.17	3.86899	99.6	96.3	98.6	99.3	97.8	14.3	73.3	9.6	13.7	9.4	-0.1558	-1.5277	1.6836	0.814861	0.982743	3.01499	18.9933
507	-3441.13	3.84159	98.4	96.5	97.1	99.3	98.3	18.3	59.6	12.3	20.6	10.6	-0.4238	-1.3824	1.8062	0.530728	1.02774	3.0612	19.4315
508	-3441.09	3.88658	99	96.6	97.8	99	98.1	11.5	77.7	6.8	11	11.1	-0.1316	-1.2387	1.3703	0.807977	0.941467	2.4502	17.6478
509	-3441.26	3.86286	99.4	96.3	97.5	99.3	97.9	13.5	66.2	6.8	22.3	11.9	-0.2908	-1.5723	1.8631	0.687844	1.01076	3.24847	21.7417
510	-3441.15	3.83471	98.8	96.6	97.3	98.5	98	21.1	55.6	7.1	31	10.4	-0.2502	-1.9108	2.1609	0.768459	0.937129	3.83084	24.3263
511	-3441.21	3.87424	99	96.3	98	99	98.4	14.5	61.9	13.8	17	13	-0.708	-1.287	1.9949	0.290216	0.928104	3.27777	20.8945
512	-3441.21	3.88504	98.9	96.6	97.8	98.9	97.9	10.3	69.5	17.9	11.5	10.1	-0.0758	-1.6482	1.724	0.912075	0.963767	3.15726	18.6611
513	-3441.1	3.89785	98.9	96.5	97.9	99.3	98.3	10.7	66.9	17.2	11.5	12.2	-0.2918	-1.5516	1.8434	0.683382	0.896532	3.21122	21.3456
514	-3441.16	3.85551	99.1	96.7	97.8	99.5	98.5	13	77.1	7.5	14	10.8	-0.5815	-1.422	2.0035	0.419558	1.03269	3.34045	28.2723
515	-3441.17	3.86119	99.1	95.8	97.5	98.9	98	9.7	70.9	16.6	9.9	13.2	-0.3113	-1.3247	1.636	0.619438	0.934564	2.81557	18.5487
516	-3441.1	3.8317	98.7	96.6	98.3	99.3	97.7	15.6	73	4.7	14.1	15.3	0.1379	1.5751	-1.713	0.838943	0.958175	-3.08434	24.0843
517	-3441.12	3.83218	99	96.7	98.3	98.9	98	21	51.9	11.9	27.8	10.6	-0.2559	-1.6483	1.9042	0.731186	0.966058	3.34941	21.4519
518	-3441.2	3.86807	99.1	96.1	97.7	99.7	98.2	11.9	76.6	7	11.6	12.7	0.0278	1.3887	-1.4164	0.960809	0.859362	-2.62474	15.7242
519	-3441.18	3.86747	99.4	96.5	97.7	98.8	97.8	13.2	69.9	6.8	12.3	17.5	-0.2294	-1.5794	1.8088	0.746356	0.976477	3.19161	17.9025
520	-3441.13	3.81027	98.1	97	97.7	98.4	98	51.6	15.7	3.1	42.2	11.6	-1.1149	-1.6143	2.7292	0.183003	0.999636	4.44713	29.5488
521	-3441.19	3.89427	99	96.4	98	99.6	98.4	11.5	80.2	3.7	11.8	10.9	-0.1143	-1.4553	1.5697	0.854306	0.945883	2.83616	18.5795
522	-3441.2	3.85313	98.9	96	98	98.8	97.6	13.4	82.9	4.3	11	9.8	0.0365	1.6585	-1.6951	0.956875	0.930115	-3.13805	39.8547
523	-3441.23	3.88403	98.8	96.1	97.2	99.3	98.5	9.1	77.8	8.6	12.4	13.1	-0.3801	-1.0531	1.4332	0.469582	0.879816	2.40619	18.9742
524	-3441.07	3.8914	99	96.9	98.1	99.7	97.7	13.4	62.5	15.6	15.1	11.5	-0.2138	-1.3542	1.5679	0.727331	0.939114	2.75566	16.1032
525	-3441.22	3.86519	98.7	96.1	97.5	99.7	98	9.4	78	8.4	13	11.9	-0.0484	-1.6729	1.7213	0.943731	0.943227	3.17651	21.303
526	-3441.02	3.8496	98.5	96.7	97.9	99.7	97.9	9.8	78.7	8.5	15.5	9.5	-0.1626	-1.431	1.5936	0.795908	0.998655	2.84197	18.6597
527	-3440.87	3.86709	99.4	96.8	98.2	99.6	97.7	9.8	80.9	7.2	11.6	11.8	0.0051	1.4622	-1.4673	0.993013	0.965362	-2.7407	17.3898
528	-3441.02	3.87779	99.1	96.5	98	99	98.4	11.2	69.5	16.7	9.3	14.1	-0.3628	-1.1178	1.4806	0.509968	0.941968	2.50102	21.3404
529	-3441.12	3.88117	99.2	96.3	98.1	99.8	97.6	10.4	77.5	8.4	12.5	11.4	0.1355	1.7159	-1.8514	0.853612	0.850794	-3.34469	19.0914
530	-3441.18	3.84156	98.9	96.5	97	98.4	97.3	12.1	58.8	17.3	16.4	19.3	-0.7299	-1.2022	1.9321	0.244462	0.950812	3.16185	21.4326
531	-3441.18	3.89669	99.6	96.7	97.5	99.6	98.1	10.5	77.4	9	10.7	9.8	0.0833	1.4282	-1.5115	0.889807	0.949531	-2.75362	18.7581
532	-3441.12	3.86354	99.7	96.3	97.3	99.2	97.6	11.4	81.1	7	12.3	10.6	0.4913	1.3003	-1.7916	0.45155	0.953637	-3.00027	33.4707
533	-3441.16	3.84278	98.4	96.1	98.1	99	97.7	11.4	75	5.1	14.4	15.6	-0.3536	-1.701	2.0545	0.655828	0.945551	3.5599	37.5995
534	-3441.27	3.82791	98.9	96.3	97.1	99.3	97.9	29	51.8	8.3	22.4	11.8	-0.9851	-1.3216	2.3067	0.145891	0.951692	3.75106	38.5782
535	-3441.13	3.91181	99.2	96	97.9	99.6	98.2	9.8	72.4	10.8	13.6	11.8	0.1076	1.28	-1.3876	0.844854	0.880605	-2.50179	17.0857
536	-3441.16	3.88471	99.2	96.9	97.9	99.5	98.7	14.3	78.1	7.3	11.4	8.3	-0.21	-1.6307	1.8407	0.771793	1.03507	3.26549	18.8847
537	-3441.17	3.88175	98.6	96.1	97.3	99.7	98	12.2	66.4	7.7	17	15.5	0.0117	1.3938	-1.4054	0.98337	0.872708	-2.6189	19.7246
538	-3441.18	3.83619	98.5	96.1	97.5	99.1	97.9	24.4	47.8	15.6	22.7	12.3	-0.8489	-1.2515	2.1004	0.191699	0.936444	3.42444	22.0084
539	-3441.21	3.86693	98.6	95.9	97.7	99.2	97.4	12.3	77.5	5	12.6	12.8	-0.298	-1.2564	1.5544	0.61654	0.905559	2.67361	18.6134
540	-3441.14	3.85578	98.1	96.8	97.2	99.6	97.8	9.8	79	9.3	13.8	10.2	-0.4069	-1.3767	1.7836	0.54373	0.997063	3.0293	21.0502
541	-3441.12	3.85866	99	96.7	97.6	98.8	97.7	10.7	76.5	3.4	10.8	19.3	-0.08	-1.5542	1.6343	0.902068	0.950529	2.98588	23.3098
542	-3441.18	3.87616	98.3	97	97.6	99.7	98.1	9	67.1	19.6	12.3	11.4	-0.086	-1.4858	1.5718	0.890602	0.980309	2.86403	18.5243
543	-3441.05	3.84095	98.7	96.2	98.1	99	97.3	8.5	77.1	7.3	12.7	15.4	-0.1335	-1.4694	1.6029	0.833467	0.943045	2.88243	18.7627
544	-3441.01	3.86574	98.9	96.5	97.5	99	97.8	11.1	73.2	8.3	14.7	14	0.1246	1.4264	-1.5511	0.83929	0.872763	-2.79294	23.9913
545	-3441.16	3.88903	99.1	96.6	98	99.8	97.8	9.2	84.3	3.5	11.6	10.2	0.08	1.5185	-1.5985	0.899948	0.940961	-2.9191	21.1614
546	-3441.07	3.85631	99.7	97	97.6	99.1	97.9	10.8	64.2	20.4	12	13.2	0.1179	1.4134	-1.5314	0.845969	0.941188	-2.76165	24.4151
547	-3441.11	3.86861	98.7	96.6	98	99.4	97.8	13.9	67.8	7.7	19.6	10.8	-0.0582	-1.6445	1.7027	0.931655	1.00996	3.13296	18.8192
548	-3441.13	3.87087	98.6	96.9	97.9	99.4	97.9	9.6	76.9	9.3	11.2	13.9	-0.2267	-1.3631	1.5898	0.714789	0.969787	2.78694	18.7648
549	-3441.15	3.84343	99.6	96.6	97.3	98.8	98.1	20.3	57.9	6.4	27.7	10	-0.3479	-1.6828	2.0307	0.657343	0.927406	3.51962	19.1832
550	-3441.11	3.90596	99.4	96.3	98.4	99.4	98	9.8	76.4	6.4	10.8	12.6	-0.4733	-1.0601	1.5333	0.382693	0.89266	2.54461	16.3963
551	-3441.05	3.88049	99.4	96.8	97.8	99.4	98	10.3	80.2	5.4	12.1	10.5	0.1641	1.4435	-1.6076	0.79579	0.92488	-2.86688	19.1507
552	-3441.15	3.87693	98.5	96.7	97.9	99.7	97.7	13.5	59.3	23.5	13.5	10	0.0138	1.4703	-1.4841	0.981426	0.913475	-2.76416	21.8294
553	-3441.17	3.91242	99.8	96.6	97.3	99.1	98	12.9	74.7	8.6	10	11.6	0.0337	1.3103	-1.344	0.949853	0.887624	-2.48385	17.1487
554	-3441.08	3.84459	98.8	96.6	97.1	98.8	98.2	16.2	76.2	7.1	10.1	11.9	-0.3488	-1.3036	1.6524	0.577806	0.998872	2.82273	21.6386
555	-3441.11	3.86061	99.2	96.8	97.6	99.1	98.3	9.7	72.2	18.7	9.1	11.2	-0.2979	-1.3668	1.6647	0.642076	0.996018	2.87703	21.1505
556	-3441.1	3.85748	99.3	96.6	96.8	99.6	97.9	15.9	56.4	19.5	16.3	14	-0.3041	-1.1492	1.4532	0.581544	0.891057	2.48403	19.6991
557	-3441.18	3.84926	99.5	96.9	97.5	99.5	98.3	9.7	74.2	16.4	10.7	11.3	-0.1791	-1.5818	1.7609	0.796547	0.980945	3.1408	72.8138
558	-3441.16	3.86341	98.9	96.1	97.8	99.8	97.5	9.8	84.1	4.6	12.4	9.7	0.2112	1.6539	-1.8651	0.773532	0.902409	-3.30995	18.8446
559	-3441.13	3.88835	99.4	96.3	98.1	99.9	98	13.8	77.4	3.1	13.3	10	0.0562	1.6038	-1.66	0.932279	0.937082	-3.05479	18.8982
560	-3441.08	3.88216	99.7	96.3	97.2	98.9	97.6	18.9	51.7	15.7	20.5	11.9	-0.3213	-1.6939	2.0151	0.681163	0.90595	3.50889	21.8079
561	-3441.17	3.86754	99.8	96.6	97.5	99.6	97.7	12.9	71.7	15.3	9.8	11.8	-0.1783	-1.1557	1.3339	0.732714	0.94096	2.34701	20.68
562	-3441.14	3.84467	99.4	96.7	97.1	99.6	98.4	9.8	78.8	10.2	13.6	9.7	-0.0778	-1.3083	1.3862	0.887679	0.9551	2.52401	18.689
563	-3441.2	3.86594	100.2	96.3	97.3	98.5	97.6	11.3	83.9	5.8	10.1	10.6	-0.0193	-1.3643	1.3836	0.97216	0.962055	2.57106	18.0622
564	-3441.07	3.86416	99	96.8	97.3	99.2	97.8	8.6	68.5	15.2	12.6	14.9	-0.432	-1.3205	1.7525	0.506958	0.914877	2.95899	30.1172
565	-3441.19	3.88123	99.2	96.6	97.5	99.8	98	10.6	70.9	16.5	11	9.7	0.1462	1.1488	-1.295	0.774194	0.923064	-2.29861	18.4932
566	-3441.12	3.84907	98.9	96	97.7	99.1	98.2	10.9	79	10.3	10.4	11.3	-0.3591	-1.2839	1.643	0.56289	1.03633	2.79953	21.0274
567	-3441.16	3.87308	98.5	96	97.1	99.2	98	12.2	74	9.5	11.9	13.2	-0.2815	-1.3892	1.6707	0.663023	0.909977	2.89885	18.1773
568	-3441.15	3.86379	99.1	95.5	97.7	99.2	97	17.4	76.7	4.2	13.5	10.8	0.0586	1.9486	-2.0072	0.941628	0.888024	-3.70209	21.5786
569	-3441.01	3.86769	99.7	96.2	97.6	99.6	97.7	11.7	74.3	10.2	10.8	14.2	-0.1434	-1.1809	1.3243	0.783466	0.891621	2.35521	16.91
570	-3441.12	3.9247	99	96.9	97.9	99.7	97.9	11.2	71.3	5	12.1	15	0.1131	1.5984	-1.7115	0.867794	0.790958	-3.10204	18.9122
571	-3441.08	3.84167	98.5	96.5	97.7	98.8	97.9	27.4	48.7	5.6	29.2	11.6	-0.6103	-1.8286	2.4389	0.499517	0.966585	4.11325	36.0447
572	-3441.12	3.84723	99.3	96	97.6	99.1	98.3	11.5	74.7	13.5	10.3	12.2	-0.482	-1.0718	1.5538	0.379606	0.909024	2.57762	18.7248
573	-3441.16	3.88048	99.4	95.8	98.1	99.3	98	12.9	77.4	7.9	11.6	10.1	-0.025	-1.5887	1.6137	0.968966	0.907877	2.99634	18.0677
574	-3441.19	3.86967	99.2	96.8	97.8	98.8	97.9	10.6	72.6	13	13.7	10.4	-0.262	-1.5518	1.8138	0.711144	0.977179	3.17718	21.9787
575	-3441.17	3.90171	99.7	95.8	97.9	99.6	98	12.3	69.7	11.5	12.1	12.4	0.0695	1.5246	-1.5941	0.912802	0.83872	-2.91993	18.5952
576	-3440.99	3.83984	99.1	96.5	97.4	98.9	98	29.8	35	20.1	26.2	11	-0.4587	-1.9076	2.3663	0.612297	0.925549	4.06694	23.9138
577	-3441.16	3.8779	99.2	96.7	97.7	99.1	98.2	11.6	77.7	9.4	11.1	11.1	-0.0439	-1.2925	1.3364	0.93427	0.935784	2.4606	16.8515
578	-3441.16	3.86673	99.1	96.9	98.1	99.4	97.6	10.2	78.9	10.4	11.5	9.8	-0.064	-1.5692	1.6332	0.921625	1.0047	2.9978	18.1507
579	-3441.14	3.84055	99.3	96.1	97.1	99	97.6	9.5	67.7	19.9	11.8	12.6	-0.1041	-1.5329	1.637	0.872789	0.940906	2.97047	23.4405
580	-3441.09	3.78305	97.8	96.6	98.2	98.3	97.9	51.6	3.2	13.6	47.5	10.8	-1.3088	-1.6073	2.9161	0.102363	0.986001	4.73363	44.7009
581	-3440.97	3.90045	99.7	96.2	97.5	99.2	98.1	11.1	73.4	11	10.8	11.6	-0.0387	-1.4169	1.4556	0.946866	0.885078	2.68813	18.2445
582	-3441.17	3.86155	99.3	96.2	97.5	99.2	98.1	12.3	74.7	4.2	13.5	16.8	0.212	1.3382	-1.5502	0.726449	0.898839	-2.72402	21.58
583	-3441.15	3.87426	99	96.6	97.9	99.5	98.1	9.9	72.6	9.7	11	15.7	-0.0592	-1.4184	1.4776	0.919839	0.938249	2.71109	18.6624
584	-3441.16	3.87717	99.2	96.3	98	100.3	97.8	10.5	77.3	3.7	13.2	13.6	0.1694	1.3995	-1.5689	0.784015	0.880007	-2.79065	18.4434
585	-3441.16	3.83827	98.4	96.7	97.2	98.7	98.5	15.2	64.1	13	19.2	10.9	-0.4457	-1.4299	1.8756	0.52471	0.975158	3.17573	19.7048
586	-3441.09	3.88483	99.5	96.6	97.9	98.8	98.1	11.5	68.2	14.2	13	12.3	-0.1064	-1.62	1.7263	0.876785	0.876253	3.13539	18.0962
587	-3441.11	3.89109	98.9	96.2	98.4	99.1	97.4	10.1	72.1	11.1	13.6	11.5	0.0912	1.3397	-1.4309	0.872561	0.901768	-2.59632	15.8979
588	-3441.21	3.84778	98.9	96.6	97.1	99	98.1	9.5	79.9	10.4	11.5	9.9	-0.0414	-1.0114	1.0528	0.92144	0.935475	1.93231	18.0849
589	-3441.13	3.84868	99.7	96.9	97.4	99.5	98.2	14.3	67.4	17.5	12.4	10.2	-0.3056	-1.3262	1.6318	0.62542	0.984372	2.8113	22.2009
590	-3441.07	3.87995	99.2	96.8	97.9	99.7	98	19.9	44.2	29.1	12	14	0.3043	1.4041	-1.7084	0.643763	0.927793	-2.95332	33.3653
591	-3441.16	3.85922	99.1	95.7	97.6	99.2	97.8	21	62.2	4.8	21.5	11.9	-0.1798	-1.7551	1.9349	0.814149	0.910862	3.46453	19.4029
592	-3441.13	3.86584	98.5	96.2	97.5	99.7	98.4	8.8	78.5	8.9	12.6	12.9	-0.4265	-1.2611	1.6875	0.49455	0.904928	2.84385	18.8542
593	-3441.06	3.84167	99.1	96.9	98.1	99.5	97.9	13.1	75	3.1	19.2	10.8	-0.0429	-1.5818	1.6247	0.947183	1.04849	3.00072	23.3978
594	-3441.02	3.82339	98.1	96.8	97.7	98	98.3	41.8	25.3	6.4	39.7	11.9	-0.8256	-1.9072	2.7328	0.395757	0.960941	4.54256	19.0107
595	-3441.17	3.86716	99	95.9	97.3	99	98	10.5	74.9	9.7	13.3	13.2	-0.1698	-1.5239	1.6937	0.799523	0.824834	3.02285	19.1547
596	-3441.16	3.82418	98.9	96.6	97.7	98.3	98.7	36.2	37.6	5.9	34.9	10.9	-0.2876	-2.0186	2.3062	0.750578	0.993567	4.07281	27.1581
597	-3441.14	3.87743	98.8	96	97.4	99.3	97.6	11.1	81.8	4.2	10.8	13.2	-0.1718	-1.3122	1.484	0.768482	0.886154	2.63077	20.6134
598	-3441.15	3.86473	99.1	96.6	97.8	99.5	97.5	10.6	80	4.8	11.3	14.6	-0.0301	-1.4109	1.441	0.958224	0.900159	2.66867	18.3395
599	-3441.2	3.85183	99.1	96.7	98.2	98.8	98.4	11.1	73.6	17.9	9.5	10	-0.1744	-1.3763	1.5506	0.775098	1.00992	2.75286	22.6108
600	-3441.15	3.86978	98.7	96.6	98.2	99.5	98.2	10.3	79.2	8.3	11.4	11.6	-0.0858	-1.5593	1.6451	0.895682	0.953502	3.00121	19.41
Average	-3441.14	3.86018	98.9742	96.506	97.6295	99.2338	97.948	15.078	67.6628	10.5377	15.7093	12.1715	-0.228458	-0.738259	0.966715	0.684544	0.943871	1.64881	22.0167
Standard-Deviation	0.0603156	0.0240672	0.453522	0.387424	0.360342	0.453805	0.339012	8.70179	17.2364	7.96455	8.12252	2.27286	0.325845	1.24707	1.47429	0.226947	0.0486417	2.58381	6.69249

## Sheet: 77K-Normal_Modes
Structure-Nr.	δ / mm s-1	ΔEQ / mm s-1	1	2	3	4	5	6	7	8	9	10	11	12	13	14	15	16	17	18	19	20	21	22	23	24	25	26	27	28	29	30	31	32	33	34	35	36	37	38	39	40	41	42	43	44	45	46	47
1	0.906426	2.71023	0	0	0	0	0	0	0.0137975	2.61135	-1.03999	-0.204985	0.346049	0.233692	0.783953	0.190971	1.52746	0.74842	1.15737	-0.0527253	-0.0863435	0.664634	-0.174334	0.015101	0.243796	0.0974704	0.322173	0.269126	0.383451	-0.00919165	0.150881	0.227623	-0.367044	0.00124423	-0.13929	-0.051601	-0.432914	-0.0327856	0.345457	0.146369	0.204333	0.54211	0.00617112	-0.272666	0.799344	0.699948	-0.252567	-0.102616	-0.0759375
2	0.904131	2.75945	0	0	0	0	0	0	0.11245	-1.19411	-1.88106	-1.0964	0.248309	0.508829	-1.36737	-0.643547	-0.554711	-0.528104	0.343669	-0.105179	-0.129838	1.53159	0.0838371	0.0885647	0.283955	0.0225577	-0.0341305	-0.230963	0.85264	-1.18933	0.890457	0.305222	0.0633348	0.0736416	-0.0729525	-0.414677	0.27263	0.119849	0.11481	-0.406109	-0.154923	0.0578311	0.0916016	0.0714	-0.201404	-0.256847	-0.214934	-0.133837	-0.16219
3	0.903852	2.98248	0	0	0	0	0	0	0.128278	0.133233	0.880492	0.270942	0.667378	1.54569	-0.195348	0.863121	-0.86354	-0.582631	0.0164375	0.600681	0.74745	-0.634475	-0.0562539	0.139606	-0.12786	-1.24455	-0.27624	0.444158	-0.137731	0.481376	0.0102829	-0.474342	-0.533869	-0.179155	0.441127	0.499066	-0.23152	0.379161	-0.145442	0.205555	0.0790482	0.329246	-0.350759	0.393172	0.129983	-0.105697	-0.0159867	0.0698541	-0.461341
4	0.974917	3.30487	0	0	0	0	0	0	-0.0539667	-0.308404	-1.09883	0.512304	-2.5654	-0.192345	-0.167138	0.55576	-1.58476	-0.0640581	-0.499134	-0.245492	0.134253	0.546496	0.155947	0.538883	-0.0786984	0.241924	-0.40501	0.197644	-0.200356	0.151333	-0.236514	-0.107926	0.20058	0.496361	-0.112667	-0.131581	0.0572843	-0.0369067	0.333716	-0.245265	-0.197522	0.088751	0.213754	0.0506471	0.135745	0.175734	-0.159708	-0.0515922	-0.153173
5	0.954136	2.61247	0	0	0	0	0	0	-0.000462356	-1.89327	1.52629	1.13893	0.986068	0.663773	-0.362564	-0.124279	0.343506	-0.668812	-1.11905	-0.0392083	0.126861	-0.912108	0.169236	-0.382175	0.328483	-0.497545	0.239294	0.466468	-0.402079	0.159225	-0.472851	-0.474333	0.186517	-0.224569	-0.614115	-0.308582	-0.0845953	-0.306497	0.0369472	0.0925607	0.155428	-0.23391	-0.182286	0.575788	-0.146115	-0.445714	-0.004616	-0.417794	0.285204
6	0.864888	3.19116	0	0	0	0	0	0	0.040632	2.94306	0.140871	2.17474	-1.36477	-0.373091	0.527096	1.20188	-0.543304	-0.843659	1.06093	0.829765	-0.00494879	-1.32739	0.683872	0.408749	-0.255922	0.595888	-0.175439	-0.457061	-0.488026	0.550328	-0.395373	-0.013328	-0.266197	-0.441903	0.256408	0.0608108	-0.508877	-0.40654	0.581635	-0.163783	0.0561409	-0.241107	0.52302	0.210979	0.420382	0.436094	-0.301958	-0.195647	-0.042367
7	0.962534	2.7605	0	0	0	0	0	0	0.0403899	-1.50069	-2.48203	0.138318	0.951154	1.02782	0.400498	-0.963669	0.47779	-0.311377	0.693635	1.02372	-0.151557	0.311574	-1.0334	0.323553	-0.512109	-0.0482876	-0.0685214	-0.149854	0.676714	-0.855042	1.16149	-0.0452616	-0.268927	0.0768088	-0.346478	-0.0718895	0.00983464	0.318604	-0.426693	-0.521612	-0.577196	0.625324	0.0494018	0.312038	-0.203757	-0.300501	0.00951677	-0.00150023	-0.144715
8	0.936734	2.91263	0	0	0	0	0	0	0.0132919	0.340018	-0.519268	1.3052	0.836009	0.268076	-0.0405394	-0.0679732	-1.95972	0.472749	0.3459	-0.66347	-0.0618406	0.726231	0.0816598	-0.0205787	-0.555996	0.466046	-0.26892	-0.147507	-0.207186	0.000953329	0.204402	0.0265485	-0.174813	-0.249817	-0.24949	-0.486198	0.303997	0.1771	-0.374329	0.0225172	0.323904	0.0779452	0.180995	-0.236441	0.120007	0.151362	-0.111861	0.0618089	-0.0940527
9	0.914362	-3.3346	0	0	0	0	0	0	-0.066611	0.0437073	-2.07534	-0.844296	1.88282	-0.559705	0.0343562	-0.324376	0.537343	0.341526	-0.811119	0.36222	-1.61462	0.0659599	-0.274144	0.606307	0.11239	-0.433578	0.800385	-0.504292	-0.264734	0.174508	-0.00847913	-0.267309	-0.212797	-0.026081	0.657313	-0.367068	0.256371	0.0354261	-0.194463	0.0678787	0.170647	-0.135113	-0.10258	-0.346245	0.242173	0.16725	0.0849243	-0.331194	0.166077
10	0.846352	-2.80501	0	0	0	0	0	0	0.0083408	0.429165	0.839917	-0.852216	0.755891	-1.404	-2.15956	-0.170545	-0.520632	-0.964749	0.325659	-0.36456	-0.000191212	0.526982	-0.0117921	-0.792954	-0.298601	-0.103923	0.0346487	-0.196478	0.348257	-0.386051	0.182211	-0.0146193	0.2968	-0.302467	-0.353524	0.325833	0.0530507	-0.248955	-0.204819	0.18974	-0.152273	-0.092576	0.0970542	0.451441	0.113839	-0.422698	-0.106311	0.189388	0.137477
11	0.938798	2.98284	0	0	0	0	0	0	0.0679051	2.79285	-3.82352	2.82175	0.0526731	0.788699	1.81696	-0.147672	-0.462798	-0.606362	-0.194215	-0.425549	-0.146317	-0.616855	-0.958977	-0.316523	-0.442323	0.00387054	0.128956	0.203723	-0.471797	0.250708	-0.941914	-0.0667266	0.568952	-0.308894	0.174983	0.0406272	-0.0332672	-0.171339	-0.458492	-0.0134437	-0.194552	-0.450928	-0.0228707	0.473301	0.658816	0.216796	0.0739469	-0.159951	0.174856
12	0.954023	2.82846	0	0	0	0	0	0	0.040299	-4.3817	2.91341	0.251052	0.591866	0.449517	0.804517	-1.11742	0.638744	0.0434861	-0.681221	-0.544968	1.48122	-1.00436	-0.196961	-0.174598	-0.303717	-0.718718	-0.327844	-0.182725	-0.454849	0.522877	-0.693993	0.276472	0.088633	0.380293	-0.213496	0.301211	-0.229671	-0.0763534	0.201259	0.190035	0.20432	-0.255992	0.735403	-0.0942788	-0.611469	-0.658712	-0.315216	0.378622	-0.0274732
13	0.954732	2.61468	0	0	0	0	0	0	0.0196746	2.16098	-3.65223	0.745559	-1.70674	-1.12668	0.343989	0.34595	0.49472	-1.25028	0.227267	-0.219523	0.0636813	0.816616	0.0599734	0.202117	0.260278	0.0107482	0.222684	-0.450029	-0.280198	0.0607637	0.345401	0.0837003	0.134532	-0.127463	-0.0661407	0.0196001	0.208256	0.199138	0.138769	-0.18785	-0.615586	0.0775115	-0.0648684	-0.0415172	0.620922	-0.0531992	-0.129949	-0.025123	-0.0897303
14	0.949637	3.02634	0	0	0	0	0	0	0.0540697	-1.86346	0.0937047	1.21647	0.13365	0.302659	1.74002	0.828921	-0.528314	0.912254	0.126639	0.495878	0.15564	-0.299705	-0.389647	-0.182876	0.235207	0.203701	-0.488314	-0.40171	-0.257951	-0.0440199	0.0621085	0.0510236	0.281968	-0.109902	0.012986	0.44585	-0.141704	0.520058	-0.225608	-0.0382894	-0.0887791	-0.0747269	0.16695	0.21467	0.250848	-0.00485864	0.055885	0.213913	-0.133232
15	0.91431	2.6756	0	0	0	0	0	0	0.0393066	-2.21885	0.132452	0.925599	-0.963058	0.465988	-0.211277	0.494942	-0.715165	-0.292202	-0.16746	-0.854106	-0.639273	-0.786742	0.326251	0.311164	0.347456	0.28946	-0.337266	-0.660066	-0.222302	-0.120434	0.300485	0.0112473	-0.169282	-0.0967565	0.253289	-0.308364	0.0491808	0.218096	-0.304001	-0.0346211	-0.0143208	0.172297	0.282815	-0.419552	-0.216864	-0.516134	-0.522974	0.29136	0.0816169
16	0.992048	2.58452	0	0	0	0	0	0	0.0528304	2.13218	0.594361	0.424362	-0.883064	0.629677	1.62653	-1.08326	-0.316714	0.614867	-0.816737	0.136931	-0.119308	-0.135026	0.721374	-0.27849	0.383509	0.456344	0.464501	-0.0283145	0.191323	-0.275799	0.175249	0.0501388	0.0693687	0.173693	0.135451	-0.0303833	-0.0966442	-0.629849	-0.229203	0.168995	0.290527	-0.0852373	-0.211273	-0.118195	0.1275	0.0965986	-0.0178291	0.138004	0.175445
17	0.961386	2.64512	0	0	0	0	0	0	-0.0324853	0.827855	0.0559598	-0.961297	-0.064227	-1.03153	-0.0377279	-0.097612	-0.358848	1.29596	0.261185	0.363984	0.0988287	0.0278519	0.147898	-0.146044	0.179869	-0.277778	0.0978537	0.358227	-0.191579	-0.207004	0.233131	0.475484	-0.420453	0.535028	-0.273521	-0.302469	0.0645891	0.0992237	-0.14897	0.501773	-0.443572	0.586403	-0.162131	-0.152373	0.337938	-0.000272839	0.130006	0.331797	0.123309
18	0.964579	3.00651	0	0	0	0	0	0	0.00261567	-0.508981	-0.892575	0.565902	0.160095	0.657383	-0.926316	-1.64559	0.286995	0.39334	0.045101	-0.0574871	-0.59175	-0.600609	0.0658761	-0.232975	0.245151	-0.00502613	0.0869471	0.00286596	0.377125	-0.207932	0.20924	0.0653162	0.227685	0.466524	0.475444	0.236573	0.064443	0.240816	-0.139068	0.0572559	-0.335317	0.231769	0.0525886	0.194801	-0.45343	-0.318161	0.203062	-0.0942777	-0.0788575
19	0.929949	2.47263	0	0	0	0	0	0	-0.0483144	-0.551063	1.13904	-0.929272	-0.220759	0.425574	0.893906	1.99527	1.68006	0.0193838	-0.209175	-0.972338	-0.11411	-0.223382	-0.223387	-0.620303	0.475116	0.508244	0.0551639	-0.00424007	0.622894	-0.274157	-0.127876	0.260918	0.097708	0.110793	0.0152386	-0.367329	-0.454666	0.0270354	-0.398055	-0.655988	-0.163267	-0.241831	-0.116854	-0.133901	0.00887348	-0.203736	-0.178007	-0.108411	-0.364246
20	0.953356	3.28224	0	0	0	0	0	0	-0.0600095	0.516121	-4.05967	-0.64041	-0.689366	-1.18727	1.97275	0.886653	-0.712271	-0.192897	-0.292214	-0.365216	-0.726788	-0.489214	0.106101	0.525967	0.221824	-0.408117	-0.141846	-0.270551	0.019139	0.361131	-0.114515	0.259149	0.47984	-0.0750562	0.330799	0.395584	0.0769855	0.110195	0.135027	-0.0656362	-0.470688	-0.498803	-0.290311	0.0454443	0.777196	0.835041	-0.0556905	-0.227812	0.300989
21	0.988769	2.92123	0	0	0	0	0	0	-0.012225	-2.40374	-0.391799	-0.17729	0.1894	-1.05515	0.412319	0.725071	1.23835	0.363734	-1.15818	0.190283	0.738808	-0.502615	-0.661952	0.349946	0.841099	-0.30728	-0.522628	0.692219	0.0437726	-0.321198	-0.164648	0.316491	-0.272773	0.193214	0.120631	0.470402	0.298117	0.365139	0.00570285	0.0531723	0.205306	-0.621758	-0.136683	0.268346	0.0163361	-0.0752282	-0.00841954	-0.221093	-0.199547
22	0.942218	3.29455	0	0	0	0	0	0	-0.02471	-1.18652	0.0712513	-0.883113	-0.58197	1.83827	0.073593	1.11507	-0.76007	0.0916064	-1.39451	-0.304108	0.189073	0.207227	0.648022	-0.203703	0.131856	0.209943	0.380824	0.609104	-0.240307	-0.0464247	-0.0359348	0.405669	0.200892	0.266431	0.211715	-0.0175222	0.142913	-0.131737	-0.115816	0.0132045	0.0580171	-0.579621	-0.128711	0.321228	-0.192267	0.175298	-0.0151991	0.0653596	0.592997
23	0.91162	2.59254	0	0	0	0	0	0	0.117995	-0.90016	0.724486	0.402328	0.164504	-0.682324	0.947459	-0.358784	0.830976	-0.246657	-1.81155	-1.45208	0.277728	0.0737391	-0.239086	-0.388574	-0.332016	-0.202228	0.106984	0.308795	-0.0282108	-0.00476466	0.262671	0.0853875	0.256862	-0.305056	-0.230556	-0.3422	-0.351559	0.214866	0.268903	0.0394851	-0.246548	-0.35859	-0.33228	0.165316	-0.224105	-0.177438	0.251934	-0.204303	0.509039
24	0.937945	2.96093	0	0	0	0	0	0	-0.112302	1.08598	-2.65597	0.18425	0.445245	-2.23003	-0.229814	0.107806	0.486524	-1.56758	1.0038	0.0277364	-1.31892	-0.12685	0.179461	-0.727423	0.362217	0.985961	-0.0360761	-0.0512185	-0.119754	-0.011658	0.492588	0.277858	-0.0660936	-0.108781	0.258867	0.202505	0.311715	0.100361	-0.23901	0.128627	-0.0650828	-0.0219296	0.174157	-0.13258	0.234913	0.372676	0.109969	0.0899317	0.213356
25	0.965176	3.57975	0	0	0	0	0	0	-0.158656	0.804679	-0.0922168	-2.74733	0.327784	-2.50334	-1.17308	-0.0810616	1.09563	-0.851754	0.161975	0.224465	-0.221475	0.088146	0.530849	-1.10891	0.991072	0.357075	0.0515904	-0.0930484	0.0512699	0.074737	-0.110417	0.689723	0.317334	0.116071	0.20622	0.379759	0.388216	-0.288791	0.426233	-0.281721	-0.490741	-0.206268	-0.324816	0.427284	0.178845	0.213352	-0.52786	0.110638	-0.15551
26	0.906981	2.93751	0	0	0	0	0	0	0.0542381	0.733587	-1.40047	0.87349	-1.9796	-1.30658	1.00078	-0.178769	0.444354	-0.19091	0.279544	0.208149	0.0638264	-0.23491	0.250789	-0.274578	0.195167	-0.170489	0.47323	0.354019	-0.311627	0.160026	-0.319676	-0.171616	0.0936012	-0.0478759	0.188875	0.123049	0.264463	-0.106354	-0.11847	-0.467854	-0.520165	-0.176014	-0.0371647	0.596049	0.488059	0.11255	-0.454857	0.0222241	-0.0178197
27	0.959705	2.80232	0	0	0	0	0	0	-0.0619106	2.55771	0.514153	-1.73862	-0.0121986	-0.804474	-0.0978781	-0.504253	0.72363	1.45873	0.261717	0.0909324	0.51177	0.42811	0.0439835	0.0076608	0.430026	-0.108412	-0.147399	-0.434141	0.754766	-0.336625	0.464936	0.566193	-0.0939925	0.220034	-0.0672191	-0.561241	0.0873452	0.023888	0.425135	-0.00193678	0.491713	0.131327	0.0968162	-0.3454	0.33993	-0.13384	-0.482746	-0.38656	-0.0165483
28	0.997338	2.90826	0	0	0	0	0	0	0.0367334	-1.4744	3.45998	1.09749	-0.166593	1.07471	-0.0244844	-1.25479	0.639866	-0.233706	-1.2703	-0.768391	1.01303	0.271736	-0.297917	0.182341	-0.23751	-0.30126	-0.568106	0.357833	0.468228	-0.521494	-0.275854	-0.206207	0.156982	0.0186559	0.0546921	-0.486451	-0.166636	-0.0645261	-0.0350683	-0.64139	0.235146	-0.0109396	-0.0237515	0.106629	-0.532055	-0.516335	0.130895	-0.344845	-0.278338
29	0.954093	2.88337	0	0	0	0	0	0	-0.0514565	4.24686	-0.77694	-0.789741	0.68265	0.367551	0.534304	1.33672	-0.398561	-0.532007	0.731117	-0.586567	0.409499	-0.262867	0.121962	-0.113034	-0.579134	-0.383136	-0.0783664	-0.219348	-0.413864	0.729217	0.0015273	0.153271	-0.706695	-0.193027	-0.186809	-0.184072	0.0745695	-0.238403	0.142927	0.112279	0.314683	-0.276612	0.315004	-0.17683	0.790301	0.26425	-0.197696	-0.260344	0.31304
30	0.994489	2.81965	0	0	0	0	0	0	-0.006107	2.56639	-0.591313	1.17221	0.190168	-0.450458	0.234634	-0.18375	0.534617	0.873073	0.443316	0.321865	0.395299	0.266195	-0.214588	-0.119457	0.366657	0.516524	0.136156	-0.286296	-0.68047	0.730311	0.0988902	-0.225898	-0.257083	-0.367094	-0.478763	-0.258951	-0.413779	-0.0934729	0.388949	-0.151703	0.358738	-0.321121	-0.211764	0.521474	0.174047	0.13664	0.236533	-0.352157	-0.0910495
31	0.959699	2.94179	0	0	0	0	0	0	0.0674081	1.24375	-0.902499	1.29387	1.3971	-0.255098	-0.392401	-1.55489	0.345579	0.0599349	2.17606	0.166728	0.108558	0.205399	0.662003	-0.60094	0.874234	0.284619	-0.307695	-0.548546	0.624889	-0.638379	0.153924	0.187256	-0.172535	0.119235	0.273335	0.190378	0.102418	0.015617	0.00275758	-0.137769	-0.0049458	0.248291	0.0532713	0.109786	0.136963	-0.131609	-0.0993627	-0.0853149	-0.0697115
32	0.898276	2.67915	0	0	0	0	0	0	-0.179529	0.0111624	0.877087	-2.01019	-0.302153	-0.751561	0.40624	-0.0622131	-0.148428	-0.443474	0.239797	-0.481731	0.077365	-1.27968	-0.856128	-0.0994359	-0.0488018	0.019993	0.654801	0.104347	-0.00163054	0.212494	-0.761802	-0.296607	0.18497	-0.121241	0.0743041	-0.123922	0.19548	-0.0194063	-0.0325195	0.137254	-0.569326	0.230643	-0.120945	-0.424233	-0.105909	-0.259125	0.0923762	0.13206	0.301353
33	0.955546	3.00079	0	0	0	0	0	0	0.122739	3.86952	0.987432	0.839235	0.262044	2.58489	0.577381	0.581071	0.996748	0.805333	0.890946	0.820876	0.479795	-0.340965	0.377721	-0.393961	-0.639998	-0.357	0.129778	-0.250445	-0.259731	0.543985	-0.0533192	-0.373831	0.263917	0.27156	-0.253137	-0.129038	-0.645088	-0.655345	-0.0699226	-0.121989	-0.154761	0.0239644	-0.107799	-0.201328	-0.126848	0.0831447	0.0965754	0.016901	0.46317
34	0.905705	2.92305	0	0	0	0	0	0	-0.0648132	-0.633816	0.948398	-2.9342	1.08869	0.11034	0.0181926	-1.56585	-0.956387	-1.16099	-0.251733	1.1446	-0.288134	1.12499	-0.24692	-0.4773	-0.0446427	0.152874	0.491002	-0.236508	0.712333	-0.313958	0.458362	-0.318807	-0.224485	-0.323192	0.0693948	0.542547	0.143196	0.217125	-0.145652	0.110539	0.139093	0.258196	-0.122867	-0.0195717	-0.223191	-0.0890197	0.164883	-0.0159831	-0.157498
35	0.889428	2.85496	0	0	0	0	0	0	-0.0260231	-1.43313	0.875533	0.252012	0.950476	0.507038	-0.992194	1.41117	-0.573132	0.0877388	0.435311	0.178655	-0.122745	-0.0287984	-0.047337	0.109439	-0.275856	-0.204123	0.0966519	-0.375584	0.306466	-0.404376	0.0611675	0.796249	0.439933	0.0513564	0.117772	-0.145127	0.218264	-0.00776884	-0.259116	0.0599825	-0.0292614	-0.379505	0.290302	-0.03994	-0.0542039	-0.128539	0.187139	-0.0861721	-0.0642136
36	0.869385	-2.51138	0	0	0	0	0	0	-0.00954123	-0.82067	1.72787	0.505288	0.508154	0.95727	-1.48986	-1.12821	0.835134	0.0681801	-0.946598	0.0230491	0.16052	0.627676	0.504472	0.264965	0.818194	0.396038	0.801438	0.336652	0.436638	-0.630522	0.121757	0.188891	-0.200358	-0.285307	-0.110855	-0.267718	0.342393	-0.204255	0.0122492	0.325197	0.403156	0.0259891	-0.193895	0.137046	-0.00333173	-0.402614	-0.0487498	0.0415024	0.200023
37	0.913586	2.34894	0	0	0	0	0	0	-0.010837	-3.42849	3.7831	-0.0748918	1.2104	1.10414	0.337498	-0.314585	-0.758828	-1.66391	-0.555157	0.33153	-0.130518	0.557061	0.630566	0.0876733	-0.324056	0.128476	0.0652728	-0.26558	-0.42844	-0.171197	-0.213697	0.602364	0.202233	0.252184	-0.507268	-0.192887	-0.477991	0.15691	-0.274764	-0.238209	-0.128546	-0.169443	-0.194628	-0.0336726	-0.58046	-0.522038	-0.171697	0.545847	-0.00188509
38	0.949328	2.56754	0	0	0	0	0	0	0.0562547	-0.71297	-0.273435	1.49211	0.394749	0.170727	-0.0736531	0.0855913	0.0250546	-0.475298	-0.379036	-0.288529	-0.3782	1.39494	0.393117	0.49764	0.598813	0.473804	-0.0872854	0.280803	-0.0852153	0.118461	0.129603	0.685739	0.37388	-0.264482	-0.159268	0.297902	0.144872	0.0864285	0.132815	0.225695	0.151757	-0.0460458	-0.154176	-0.403796	0.361222	-0.142578	-0.216594	0.187695	0.0624088
39	0.977364	2.98918	0	0	0	0	0	0	0.0596763	-0.357016	-0.822107	0.617363	1.55373	-0.3556	-0.339475	-1.64858	-0.207885	0.420226	0.441979	0.446953	-1.09259	0.156165	-0.123137	0.437007	-0.0917204	0.456606	0.478147	0.484245	0.106227	-0.101581	-0.0426244	-0.519401	-0.478371	0.195466	0.0276292	-0.157042	0.186783	-0.173319	-0.0517726	-0.200551	0.195057	-0.210879	-0.132095	0.288733	-0.0286973	0.317706	-0.131966	-0.0189502	0.0550392
40	0.951323	2.81661	0	0	0	0	0	0	0.0828772	1.48884	-1.38556	-0.415656	1.60755	0.989605	0.10858	0.108546	-0.892162	-0.504004	-0.083392	0.764913	0.415283	-0.0852334	0.292727	-0.561969	0.120666	-0.0453312	0.451471	0.47763	-0.611661	0.454941	0.229564	-0.117246	0.472441	-0.210636	-0.479889	0.150214	-0.120739	-0.0929744	0.0485519	0.132524	0.269184	-0.235079	-0.0328028	-0.493917	0.351492	0.149088	-0.102093	0.00790518	0.490248
41	0.932746	-2.86897	0	0	0	0	0	0	0.0989957	-1.61088	0.0803172	3.63304	-1.4924	0.247253	0.0407944	0.168651	0.107502	-1.08932	0.607503	0.369745	0.516271	-0.49649	-0.320832	0.908725	-0.236597	0.7293	0.535307	0.927596	0.709502	-0.0147555	0.603779	-0.0582578	-0.0698078	-0.0623492	0.289789	0.366729	-0.108745	-0.103528	-0.237339	-0.429358	-0.131592	0.44431	0.0882746	0.183717	-0.589283	-0.586853	-0.17641	-0.0776062	-0.00656913
42	0.956194	-2.72603	0	0	0	0	0	0	-0.110962	1.78061	1.26842	0.649832	2.3792	-0.696307	1.26873	0.598896	0.894511	-1.27579	0.238702	0.112489	-0.413329	0.356249	0.174024	0.470223	-0.0268343	0.2638	-0.193817	1.004	0.118065	-0.420481	-0.0843912	0.288187	0.3809	0.0995371	0.246017	0.173007	0.039456	-0.0773633	0.359537	0.180257	0.245695	-0.227014	-0.70452	-0.100863	0.433765	0.308727	0.110641	-0.0268286	0.711693
43	0.870657	2.92202	0	0	0	0	0	0	0.031073	-0.67184	-1.75087	-0.481957	-0.74812	0.924717	-0.231792	0.373818	-0.136449	0.758481	0.156149	0.354181	1.08335	-0.323079	-0.149244	-0.28144	-0.536151	0.31438	-0.459955	-1.06146	0.0259104	-0.0992165	0.219168	0.210813	0.335015	0.0735213	-0.127053	0.0604719	0.140771	-0.00534892	-0.0254548	0.225054	-0.684764	0.028954	0.548195	-0.366454	0.324297	0.348861	0.0804037	0.345097	-0.474292
44	0.962006	2.91901	0	0	0	0	0	0	0.0115019	-1.24821	1.95362	-0.367723	0.190403	0.174922	-0.256605	-0.784096	2.41547	-0.616441	-0.455856	1.01724	-0.521237	0.469866	0.514498	0.685401	-0.180775	0.80562	-0.681928	-0.0740847	0.668915	-0.973178	0.900676	0.450999	0.539264	0.265158	0.169956	-0.258197	0.0760971	0.103129	-0.0229407	-0.675195	0.111285	-0.317266	-0.0847138	-0.0109461	-0.415549	-0.20016	-0.198821	0.200507	-0.0635425
45	0.888678	-2.99471	0	0	0	0	0	0	-0.0116534	-1.4924	1.96025	0.541226	-0.281455	-0.737428	-1.01354	-0.272844	0.304056	-0.188906	-0.769606	-0.94638	-0.0449584	-0.564545	0.338653	0.483138	-0.871148	0.135232	-0.0685325	0.221577	0.292258	-0.23688	0.128351	0.273387	0.355969	0.027148	0.0603866	0.201367	-0.159556	0.364305	-0.0281878	0.143502	0.353849	-0.255506	-0.169343	0.801556	-0.449643	-0.0342179	-0.15988	-0.244888	0.0999332
46	0.980035	2.90852	0	0	0	0	0	0	-0.0116195	-2.65019	0.208718	-1.20207	0.198579	-1.15317	-0.658617	-1.321	-0.0145661	0.280776	0.0398428	0.413155	-1.15722	0.965992	-0.227806	0.643229	-0.423653	0.591513	-0.158089	-0.569464	-0.411906	0.393307	-0.676128	0.0109187	0.1461	0.436752	-0.0744318	0.155455	0.224769	0.414334	-0.0386598	-0.553351	-0.406618	0.1662	0.0831886	-0.22414	-0.311398	-0.40551	0.477431	-0.284222	-0.447343
47	0.953527	-3.64397	0	0	0	0	0	0	-0.0398644	0.317863	0.377934	0.413733	0.0853252	-0.702806	-1.35319	-0.0159364	-0.435319	-0.569273	-2.07607	-0.250612	1.00158	-0.211178	-0.346261	-1.0491	0.178371	-0.0395265	-0.573218	-0.367108	-0.0988517	-0.0717062	-0.25081	-0.00176737	-0.0588807	-0.0747203	0.523861	0.154891	-0.501483	0.0868527	0.647233	-0.222023	0.237181	-0.188771	0.176612	-0.0516485	-0.0490485	0.00797624	0.206901	-0.045544	-0.0647038
48	0.874065	-2.55773	0	0	0	0	0	0	-0.0605882	0.875077	3.18856	-0.834543	1.84852	0.16385	1.65607	-1.5291	0.217389	-0.38665	0.350756	0.0201182	-0.264874	0.515863	0.288304	0.383149	-0.0792209	0.447136	-0.349728	0.172591	0.407445	-0.529061	0.400233	0.471546	0.128479	0.420621	0.515778	-0.120546	0.0950421	0.324463	-0.178776	-0.00446094	0.388447	0.173332	-0.291028	-0.306516	-0.129824	-0.154477	0.109539	-0.0628703	0.000979711
49	0.932676	-2.85365	0	0	0	0	0	0	0.0706889	-1.0268	0.639877	2.23221	0.502584	-0.127653	0.468826	-0.117736	-0.315079	-0.394752	-0.685386	0.532369	0.240599	0.70005	-0.502096	0.0469355	-0.217988	0.182763	0.130782	0.302203	-0.254782	0.123363	-0.0685261	0.156495	-0.539106	0.307406	-0.271485	-0.169654	-0.0512827	-0.188092	0.365807	-0.0827234	0.0258536	-0.0304324	0.20511	0.0500169	0.378409	-0.000976622	0.0726854	0.326656	0.0409579
50	0.992753	2.89541	0	0	0	0	0	0	0.157498	1.78737	-0.662849	1.16685	-0.133073	0.0782746	1.00425	0.616108	2.12052	0.372628	0.889403	1.8603	0.0690748	0.716728	-0.409036	-0.628507	-0.148826	-0.419022	0.127333	-0.69888	0.0493658	-0.446789	0.592279	-0.127641	0.121661	0.212696	-0.199644	-0.446826	-0.27174	0.279673	0.00169294	-0.366415	0.151483	0.283111	-0.200005	0.415994	0.181634	0.199458	0.235759	-0.191716	-0.0536648
51	0.911233	-2.6904	0	0	0	0	0	0	-0.0792593	0.355269	-1.05244	-0.311993	-0.389419	-0.133407	1.74308	-0.630377	0.574148	-0.775454	0.100928	-0.248141	-0.736689	0.0579846	-0.626076	0.49117	0.400678	0.503032	-0.208268	-0.551969	-0.477978	0.71621	0.05913	0.290554	-0.411629	-0.053911	-0.0501238	-0.223541	0.616497	0.0142241	-0.259537	0.25448	0.302043	-0.186134	0.089925	-0.0596378	0.36658	0.173504	0.460866	-0.220734	-0.259112
52	0.938041	2.84314	0	0	0	0	0	0	0.105188	-0.692005	-0.80242	1.34821	-0.338302	1.05336	-0.374265	1.74226	-1.68221	0.94322	-0.169602	0.147624	-0.903438	-0.866118	0.541215	0.170552	-0.0630811	0.115565	0.240024	0.0615431	-0.0180598	-0.0342403	0.116564	-0.0339276	0.0307613	0.261326	0.0607338	-0.180118	-0.304338	0.179028	-0.34422	-0.138301	-0.165415	-0.312672	0.156358	0.100434	0.373885	0.143169	-0.135418	-0.0971086	-0.0986232
53	0.935406	2.75843	0	0	0	0	0	0	-0.0472222	2.12722	-1.9392	-0.0817715	1.72245	0.351455	-0.593029	0.591417	0.78566	0.834723	-1.06775	0.103613	0.659825	-0.441449	-0.114848	0.728316	0.089374	-0.0964286	0.616972	0.65436	-0.424317	0.125788	-0.236449	0.300694	-0.569189	0.453632	-0.119447	0.0649677	0.303445	0.0983455	0.138668	0.345623	-0.655344	-0.254982	-0.384271	-0.580553	-0.288557	-0.176801	0.351219	-0.0934535	0.404138
54	0.978673	2.9743	0	0	0	0	0	0	0.137199	-0.0205906	-0.0554059	-0.0604167	-0.0444156	0.271138	-0.386676	-0.700357	1.50081	0.316662	-0.25709	1.01668	0.813263	0.105026	-0.634516	1.17312	0.242887	-0.256072	-0.0683965	-0.120753	0.14224	-0.45499	0.329783	-0.34579	-0.493738	0.124303	0.192609	-0.0486689	0.111308	0.20807	-0.658711	-0.108504	0.403227	0.126836	-0.589721	-0.0843449	-0.379332	-0.203558	0.158217	-0.196545	-0.311461
55	0.890971	2.54316	0	0	0	0	0	0	-0.03906	-0.498658	0.870008	-1.46007	-0.106541	0.811582	1.53894	0.483445	0.555698	0.0327584	-0.211923	-0.200274	0.477841	-1.17498	0.436616	-0.393671	-0.00526775	0.909184	0.285848	0.0153607	0.281645	0.132597	-0.104768	-0.282728	-0.181134	0.0192751	0.16154	-0.0541313	-0.188236	0.280659	0.170243	-0.0980483	-0.0335122	-0.264242	-0.0210162	-0.437707	0.0240057	0.26494	-0.24	-0.307946	0.126791
56	1.02819	3.2272	0	0	0	0	0	0	-0.0438919	1.56414	2.59549	-2.28715	-1.45307	1.18226	0.817275	-0.306133	-1.32945	0.0606013	-1.35709	-0.760643	0.534404	-0.274193	-0.51265	0.272163	0.407041	-0.328001	-0.550446	-0.597117	0.109829	-0.392682	0.313467	-0.368395	-0.12797	0.125313	0.408791	-0.0333749	-0.0451131	-1.04841	0.511148	-0.148227	0.291264	-0.0377095	-0.243778	-0.0398335	0.405832	-0.0933953	0.0154745	0.212678	-0.184602
57	0.970398	2.60249	0	0	0	0	0	0	0.0111757	1.37787	0.152399	-1.1696	-1.38188	0.256774	0.00683031	-1.58635	0.261265	0.24837	0.859463	0.289566	0.284376	0.616298	0.390326	0.0589372	-0.0593418	0.196086	-0.599656	-0.146535	0.365857	0.62173	-0.0532338	0.21132	0.243102	0.0424351	-0.475225	0.248154	-0.067964	0.357957	-0.281605	0.0249433	-0.120321	0.287652	-0.138748	0.220222	-0.0157453	-0.149744	-0.212134	-0.204028	-0.41994
58	0.951101	3.25749	0	0	0	0	0	0	-0.140144	-0.635283	0.318758	-0.103094	-1.60224	-0.0831001	-0.775095	-0.212612	-0.13211	-1.03655	0.93437	1.56271	-0.903523	-0.386529	0.921974	0.0595202	-0.161252	0.902985	0.449014	0.13704	1.04003	-0.567678	0.0146366	0.604838	0.161672	0.208407	0.0582318	0.563304	0.0669784	0.544667	-0.0337925	0.109217	-0.632393	0.380271	0.185479	0.136189	-0.0932997	-0.0767835	-0.0526869	0.210513	0.257666
59	0.919811	2.96542	0	0	0	0	0	0	0.0290866	-0.528807	-2.68291	-0.363344	0.042449	-0.531314	0.208044	-0.3609	0.0337584	-0.61528	0.6009	0.600511	0.0570706	0.303379	0.755422	-0.0409512	0.54999	-0.530439	0.100347	0.00196225	0.310267	0.0659266	0.00122269	-0.155606	-0.221405	0.0299671	-0.169968	0.0611499	-0.072368	0.0334003	-0.0413452	-0.40381	-0.667174	0.127649	-0.0792409	-0.173359	0.165417	0.170105	-0.48084	0.0751837	0.063301
60	0.938235	3.08637	0	0	0	0	0	0	0.147047	1.34253	1.15226	1.89799	1.94161	0.479603	-3.01063	0.533472	-0.856883	0.520567	-0.1452	1.29872	0.52433	-0.463668	0.156232	0.289459	-0.111513	-0.158302	-0.0672698	-0.394062	0.536952	-0.221302	0.228162	-0.0508594	0.0937541	-0.186574	0.0226448	0.410533	-0.740456	0.255018	0.194961	-0.304238	-0.19217	-0.0935812	0.11331	0.355234	-0.34445	-0.584212	-0.112677	0.0119884	-0.286441
61	0.952869	-2.9857	0	0	0	0	0	0	-0.0425076	-0.327965	-1.51617	-2.10176	1.04089	-0.434187	1.56759	0.093411	-0.160338	0.271902	1.12359	-1.29399	-0.00747595	0.234354	-0.674799	0.342172	-0.696395	-0.00944779	0.0464334	0.512354	-0.0243859	-0.106248	0.11677	0.338613	0.309349	0.113253	0.550724	-0.387478	0.2068	0.201052	-0.562732	0.168153	-0.24034	0.0651295	0.0825835	-0.430253	0.27886	0.39698	0.220671	0.15606	0.124094
62	0.952656	3.21246	0	0	0	0	0	0	0.112502	0.221874	-1.61913	0.575139	0.481154	0.272165	-0.582941	0.382964	-0.118161	0.0104649	0.0846498	-0.330671	-0.454199	0.848988	-0.180254	-0.305767	-0.580863	-0.131857	-0.10776	0.123563	-0.323553	0.366312	-0.291347	-1.00108	-0.0265129	0.0939195	0.108418	0.0389977	0.579816	-0.200819	-0.12709	0.0297522	-0.148826	0.0240732	0.190786	-0.583669	-0.299011	0.00749255	-0.0034595	0.310886	0.000767433
63	0.873345	3.06984	0	0	0	0	0	0	0.148778	-0.396239	-3.35035	2.42614	-0.962075	-0.546694	0.683134	-0.231086	0.920663	-0.214697	-0.77044	-0.565585	-0.81835	-0.591387	0.892938	1.0327	0.147308	-0.691238	0.209363	-0.364519	-0.302493	0.0392298	0.265137	-0.360022	-0.141011	0.105872	0.178166	0.338662	0.188597	0.13716	-0.134146	0.408421	-0.114887	0.0284462	0.1438	0.16615	0.104592	0.272619	-0.122666	-0.066447	0.223545
64	0.923788	2.93362	0	0	0	0	0	0	-0.238721	2.16288	0.288679	-0.0846868	0.0571819	0.120384	1.67056	0.195318	-0.171143	1.12488	-1.12745	-0.151162	-0.28748	-0.46058	-0.0651232	0.128397	0.11049	1.21223	-0.131681	0.89357	0.647176	-0.874286	0.5231	0.0277923	0.224562	-0.172792	-0.319756	-0.358336	-0.27641	0.0100602	0.253446	0.113023	0.0486394	0.204363	0.594168	-0.322532	0.502595	0.528346	0.0233663	0.232023	-0.0800463
65	0.9077	2.36184	0	0	0	0	0	0	-0.116184	1.58455	-0.830236	0.170439	-1.57476	-0.473477	0.619084	-0.166196	0.483118	-1.03016	0.951469	0.41719	0.684789	-0.0202741	0.300491	-0.5935	-0.109916	-0.61412	-0.0181337	0.264792	-1.55023	0.96695	-0.633501	-0.254757	-0.264538	-0.0714231	-0.171961	0.489586	-0.174828	-0.090887	0.147692	-0.167895	-0.181223	0.00225539	0.145578	-0.250276	0.46952	0.237966	-0.0994432	-0.0622502	-0.173524
66	0.995554	3.15584	0	0	0	0	0	0	-0.128862	3.15558	-1.16677	-0.07993	1.79469	-1.39466	0.781597	0.50432	0.356148	0.43711	0.535714	0.125454	-0.329994	-0.370193	0.0989396	0.243603	0.189705	0.410248	-0.010253	0.164392	0.351333	-0.442811	0.383518	-0.0389482	-0.000673312	-0.152265	0.15877	0.191262	0.105769	-0.49829	0.0702792	0.194312	0.456256	-0.356676	0.0858673	-0.179986	0.616963	0.260224	-0.278669	0.399721	0.375536
67	0.931652	3.01591	0	0	0	0	0	0	-0.0786761	1.45538	1.0264	-3.50853	1.70848	0.819684	-0.31476	1.31646	-0.590539	0.930371	1.70854	-0.862663	0.349939	0.309042	0.0354913	-0.144144	-0.49871	-0.503367	-0.221181	-0.0390587	0.449274	0.135181	0.529358	0.122872	-0.18334	-0.163024	0.469946	0.0513032	-0.0735005	0.101699	-0.453443	0.292854	0.173482	-0.143088	-0.265915	-0.568284	-0.240373	-0.0399124	-0.229574	-0.331763	0.0509844
68	0.915014	-3.0509	0	0	0	0	0	0	-0.154621	4.87485	-3.13442	-2.65347	-0.0566821	-2.60329	0.731256	2.27311	1.03783	0.496176	0.123532	-0.709032	-0.250248	-0.259476	-0.980929	-0.734632	0.162917	0.119306	-0.314462	0.387324	0.11057	0.0725355	-0.227532	0.164652	-0.357178	-0.192307	0.204612	0.150933	0.125892	-0.13063	-0.128664	0.602136	0.461619	-0.275193	-0.157399	0.0877385	0.993277	1.15763	0.307216	-0.0722109	-0.106648
69	0.888791	2.60103	0	0	0	0	0	0	0.071873	0.825655	-0.316454	2.08645	-1.29309	1.13188	-0.667358	0.829815	-1.55281	0.0844416	-0.542439	0.62088	0.242366	0.493308	0.187602	-0.299341	-0.176602	0.344353	-0.0142225	-0.187089	0.427016	-0.198415	0.378375	-0.110673	0.256431	-0.165485	-0.0152734	-0.235985	0.42259	-0.27169	0.0843922	0.277698	0.0788226	-0.33825	0.462087	-0.16682	0.0104471	-0.354447	-0.19775	-0.415773	0.062596
70	0.932338	-2.93499	0	0	0	0	0	0	-0.102064	0.908301	0.297002	1.10901	-0.631954	0.57809	-0.825109	0.704845	0.952665	0.0259562	-0.693146	-0.896117	-0.582957	0.501406	-0.890397	-0.0893997	0.314839	0.504131	0.0141919	-0.0200131	0.331948	0.543635	0.425971	-0.620465	-0.811966	0.426826	-0.22771	-0.358584	-0.543957	0.117528	0.234101	-0.0705312	0.508332	0.476105	0.00341886	0.25223	-0.103285	-0.0172806	0.0965321	-0.421945	0.0821194
71	0.956458	2.53543	0	0	0	0	0	0	-0.151125	1.83275	-1.14875	-1.31375	2.5742	-0.106388	0.706616	-0.427351	-0.608423	0.90142	0.969728	-1.11049	0.751521	0.472003	0.656085	-0.684097	0.440911	0.388118	0.498346	-0.208286	-0.44112	-0.133877	-0.165861	0.263222	-0.315143	-0.227921	-0.139505	0.109094	-0.0608333	0.227784	-0.373965	0.0966484	0.078565	0.218952	-0.313523	-0.209746	0.393638	0.383549	-0.293548	-0.017241	0.161146
72	0.902209	2.73367	0	0	0	0	0	0	0.085656	-2.38845	-0.142866	1.33236	-0.472449	0.833584	0.0879532	1.12974	0.653133	0.0151874	-1.71769	0.402937	-0.149465	0.656802	-0.327944	0.652139	-0.0272026	-0.316311	-0.253193	-0.00892487	-0.519975	0.0419004	-0.223354	0.00171377	0.121557	-0.0333217	-0.0817745	-0.202975	0.0261545	-0.0199278	0.241941	-0.580574	-0.0393662	-0.737223	0.587399	-0.0414098	0.512198	-0.0418632	0.187516	-0.521622	-0.115126
73	0.907064	3.06369	0	0	0	0	0	0	0.111976	-3.25569	0.32404	2.01128	-0.0394683	-0.335911	0.789968	-0.589915	0.00818554	-0.117203	0.0570057	0.0546169	-0.304672	-0.0516704	-0.116589	0.37197	0.0998916	-0.0406556	-0.104404	-0.742314	0.228483	-0.283305	-0.258871	-0.56713	-0.424464	-0.180426	-0.12948	-0.127547	-0.194777	0.123745	0.108896	-0.211847	-0.184021	-0.0289611	0.587401	-0.246149	-0.571619	-0.593902	-0.173733	0.0740333	0.11883
74	0.982532	3.04405	0	0	0	0	0	0	0.0808648	-0.409828	-1.19298	1.06403	-0.0749381	0.00911714	-0.486313	-0.215034	-0.124871	0.325202	-0.231531	0.548711	0.357581	0.521815	0.146723	0.751669	0.362962	0.604818	0.280442	-0.609993	0.268936	-0.273655	0.00576496	0.361955	0.168794	0.409066	-0.392773	0.136672	0.0469232	-0.121725	0.238517	0.327421	0.403184	0.015391	0.450112	0.0267024	-0.108302	-0.154624	0.0442484	0.111919	0.261206
75	0.986401	2.74565	0	0	0	0	0	0	-0.1812	1.8327	1.91063	-2.03609	1.40409	-0.721453	-0.212373	0.233028	-1.64675	-0.0457722	-0.0790155	-0.554952	0.547144	0.794299	0.262682	-0.525135	-0.285333	-0.480526	-0.783607	0.0716481	-0.288902	0.353073	-0.015747	0.627402	-0.135367	0.430153	-0.456291	0.432823	-0.463364	0.0402868	0.443398	-0.0500099	0.137694	0.302226	-0.277248	-0.268769	0.0939877	0.0559678	0.209651	0.0776768	-0.2837
76	1.00431	3.08557	0	0	0	0	0	0	-0.0481111	-0.119853	0.276888	-1.61957	-0.3445	-0.603776	0.492287	-0.135214	0.858733	1.43251	-0.324226	0.446173	0.102676	0.163512	-0.0145363	0.746626	-0.0297475	0.380577	-0.0278834	0.234196	0.490755	-0.0252344	-0.0569797	0.949299	0.230795	0.136095	-0.0970265	-0.0485604	0.488605	-0.0517654	-0.246018	0.558863	0.00603401	-0.159278	-0.334436	-0.0555516	0.00347983	0.153116	0.130216	0.105628	0.0480181
77	0.880975	2.81856	0	0	0	0	0	0	0.108496	1.23042	0.528273	0.745329	-1.54869	0.956833	-0.388653	0.35256	0.321986	0.0064588	0.29288	0.302253	0.31126	-1.52116	0.186253	0.381869	-0.405653	0.237795	0.30104	0.322485	0.0456611	0.0823586	-0.188802	-0.437901	-0.459798	0.0895645	-0.101653	-0.658522	-0.305702	-0.372884	0.212135	0.148657	0.23515	0.347661	0.23145	-0.0174239	-0.21207	0.33056	0.336384	0.0464264	0.311713
78	0.941209	2.84221	0	0	0	0	0	0	0.0448022	-0.448135	0.707383	0.114721	-1.02969	-0.453866	0.913021	-0.739901	-2.09105	-2.04636	-0.646548	-1.06866	-0.333275	-0.667678	0.611568	-0.403819	0.573934	-0.677264	-0.0216017	0.675158	-0.623431	0.439743	-0.62929	-0.165827	0.16475	-0.432363	0.280136	0.152171	0.110961	0.0449268	0.207466	-0.0847438	0.00753576	0.270888	-0.250709	-0.211868	-0.25837	-0.282381	0.225408	0.308783	-0.355981
79	0.929054	-2.71413	0	0	0	0	0	0	0.00755003	1.64607	3.21432	0.0480228	0.271711	0.574401	0.420086	0.506603	0.437796	0.578722	0.186383	0.465254	0.541604	-0.120284	0.914909	-0.174932	-0.437917	-0.063779	-0.284994	0.652323	-0.145093	0.150893	-0.335553	-0.31012	0.0738945	0.194697	0.0593925	0.182747	-0.132255	-0.242682	0.470147	0.229107	0.685888	-0.358183	-0.500155	0.309904	-0.0483346	0.0803152	-0.486192	-0.0484274	-0.0814867
80	0.89945	2.91185	0	0	0	0	0	0	0.0377274	-1.07836	1.96739	0.977609	-0.24995	-0.721754	-0.190738	-0.974835	0.49109	0.00242827	0.0316483	-0.764589	0.903815	0.259492	-0.420467	0.230118	-0.248471	0.294426	0.230349	0.192999	0.330151	-0.242479	0.232326	0.142121	0.16345	0.0132634	0.121306	0.00576282	0.240114	0.206449	0.220958	-0.0217146	-0.0176945	0.00489265	-0.168097	0.566504	0.0721362	-0.0948438	0.0221818	-0.0627287	-0.10375
81	0.918495	2.88231	0	0	0	0	0	0	0.111947	0.264724	-0.523397	-1.7035	-1.57985	0.586242	-0.207375	-0.37512	0.444306	-1.28333	-0.922375	0.942876	-1.16135	0.444403	0.691732	-0.513118	0.113752	-0.870693	-0.159631	-0.469622	0.829757	-0.545457	0.609999	0.533997	-0.577162	-0.0457038	-0.182404	0.0662113	-0.0876322	-0.185959	0.0897264	-0.471185	0.28044	-0.0385973	0.185619	-0.342469	-0.0130924	-0.0121613	0.30032	-0.0745527	-0.231606
82	0.888536	-2.95218	0	0	0	0	0	0	0.00819933	0.136048	-2.80332	1.01757	-1.86541	0.184562	0.910292	-0.220736	1.22495	-0.788496	-0.221389	-0.86643	-0.333682	0.478794	0.738354	-0.111998	-0.705831	0.527809	0.332386	-0.135114	-0.0862642	-0.00319191	0.387157	-0.0605596	0.261401	0.242885	0.225805	-0.303701	0.575035	0.085061	-0.129277	-0.122984	-0.691511	0.132745	0.361071	0.214239	0.239552	0.201597	0.0994211	0.330667	-0.179125
83	0.934789	2.87578	0	0	0	0	0	0	0.0126826	-2.94789	1.3728	3.47232	0.487024	0.342258	-0.198324	-0.996296	-0.246272	0.0312417	-0.161356	0.627458	0.160685	1.10606	0.0947692	0.426083	-0.154308	0.600128	-0.36625	-0.768696	0.227081	-0.17327	0.262804	-0.148502	0.126336	-0.223758	-0.103442	0.0504224	0.166595	0.530251	0.03485	-0.228729	-0.430486	-0.021982	0.0483603	-0.109085	-0.220363	-0.715438	-0.0923914	0.348114	-0.427315
84	0.918844	2.84878	0	0	0	0	0	0	0.0305132	-1.02762	0.965964	0.0167017	0.400942	-0.12932	0.948645	-1.64464	-0.236162	-0.157266	-1.75204	1.21513	0.135101	0.396072	-0.314857	0.144946	-0.0680727	0.211097	-0.238979	-0.0787702	-0.225532	0.234015	-0.108772	-0.143231	-0.320006	0.350081	0.298417	0.191406	0.442568	0.0257478	0.0938281	0.348848	-0.12034	-0.292946	-0.0971982	-0.421906	0.0784072	0.0453714	-0.225618	-0.241336	0.0939622
85	0.882145	2.54753	0	0	0	0	0	0	0.225241	-4.49654	-1.60752	2.72042	-0.734685	-1.23423	-1.01345	-0.315769	-0.348618	0.221781	-0.71306	-0.174441	-0.429331	0.0301863	-0.115812	-0.00187317	-0.392125	-0.813607	-0.0315228	-0.368979	0.0869991	-0.354905	0.716372	0.584571	-0.0711733	0.118426	-0.679705	-0.62514	0.200623	0.0993849	-0.246268	-0.0251899	-0.550036	-0.33119	0.175512	0.158313	-0.175057	-0.283714	0.137969	0.0559653	-0.275838
86	0.885753	2.83005	0	0	0	0	0	0	-0.0335663	-1.1137	-0.730004	-0.539555	-0.998425	1.37832	-0.818056	-0.448013	-1.50703	-0.347188	0.454946	-1.7374	0.0635583	0.541289	0.271111	0.496579	0.401142	0.187428	-0.408315	-0.0973862	0.365344	-0.387506	0.672104	-0.385681	0.325681	0.243563	0.0180115	-0.295998	0.474693	0.365688	-0.228432	-0.201868	-0.254215	-0.215	0.120185	-0.164535	0.262141	-0.123916	0.175893	-0.189295	0.0298559
87	0.937115	3.27818	0	0	0	0	0	0	-0.126685	-2.74796	3.0804	-1.9023	-0.746104	0.199487	0.245136	0.76723	-0.385964	-0.189815	-0.929497	-0.00111903	0.166137	0.831693	-0.944708	-0.815218	0.0566938	0.0673678	-0.273616	-0.169472	-0.0918578	-0.391532	-0.122352	-0.171134	0.656062	0.22669	0.23146	-0.102135	-0.0306364	0.323663	0.171639	0.284736	0.124719	-0.0631295	0.246056	0.104979	-0.200113	-0.564085	0.151017	-0.0358918	0.28392
88	0.914225	-3.10431	0	0	0	0	0	0	-0.0575268	-0.298883	3.3285	1.12849	1.96469	-1.80997	0.202628	0.327706	0.327372	-0.677487	0.720595	0.173795	-0.134382	0.102453	0.0436859	0.800101	0.275858	0.496873	-0.670417	0.472766	-0.651593	0.00870617	-0.125796	-0.12592	-0.385937	0.188602	0.325194	0.105175	-0.519508	0.243158	0.428894	0.0277793	0.388151	-0.354112	-0.383737	0.530608	0.360728	0.0164699	-0.2657	0.103003	0.149984
89	0.838899	2.80439	0	0	0	0	0	0	0.0430142	0.249174	0.10356	-0.203874	-1.02928	0.271577	1.72768	-0.545081	0.0892245	0.827693	-0.067941	-1.83056	0.450468	0.00228348	0.635837	0.341502	-0.136532	-0.324597	-0.00172491	0.151554	-0.33867	-0.215481	-0.181524	0.260037	-0.0627735	-0.24228	-0.0106539	-0.395057	0.0730632	0.412601	-0.23553	-0.078296	-0.0616401	0.384802	-0.0913609	0.0498101	0.00663603	0.160333	-0.133676	0.166674	-0.0733344
90	0.937463	3.84704	0	0	0	0	0	0	-0.00174633	-0.228244	-0.595395	-1.15446	-0.397904	-1.36598	0.349011	-0.542095	0.588871	-1.05762	0.0549604	-0.233821	-0.0267355	-0.293284	0.7321	0.368139	0.134687	1.02789	-0.299158	0.514693	0.473708	-0.613398	0.400733	0.622277	0.0733761	0.05038	0.0649475	0.161885	0.779588	-0.0800423	0.489312	-0.17644	-0.413784	-0.376955	0.163208	-0.370116	0.0184511	0.315976	-0.447009	-0.037481	0.327673
91	0.879159	-2.82542	0	0	0	0	0	0	0.0481203	-2.77637	-0.129948	-0.653539	1.64915	1.37669	-0.141943	-0.0998416	-1.38031	-0.379015	0.314466	0.990889	-0.342179	0.748571	-0.72788	0.0227965	-0.366964	-0.557574	0.988447	-0.053658	-0.154775	-0.16555	-0.490614	0.250996	-0.296328	-0.581792	-0.370571	-0.152499	0.277945	-0.0377625	-0.370264	-0.0570246	-0.176533	0.0973819	-0.0112085	-0.414281	-0.147654	-0.358369	-0.036816	0.250248	-0.15461
92	0.92484	2.61779	0	0	0	0	0	0	-0.0429791	2.50451	-0.504478	-0.207936	-1.90903	0.0470216	0.23907	1.06397	0.403328	0.524573	-0.701449	-1.06143	0.640807	-0.702008	0.0435954	0.0906132	-0.425285	0.29004	0.207798	0.936829	-0.512607	0.509216	-0.083439	-0.0647666	-0.199613	0.105567	0.22601	0.0417428	-0.160677	-0.256127	0.0245053	0.109005	-0.0528088	-0.187034	0.064934	-0.315237	0.0225382	0.0548768	-0.247797	-0.107285	0.371758
93	0.905098	2.74887	0	0	0	0	0	0	0.104988	0.491214	-2.02505	1.50202	0.519132	1.88531	0.228461	-0.7954	-1.35716	0.795786	0.225926	0.0672903	-0.732497	-0.198387	0.418836	0.15194	-0.0533609	-0.0705876	-0.216936	1.11599	0.732406	-0.197414	0.225346	0.625347	-0.197862	0.128679	-0.0653085	-0.0314464	-0.4069	0.290531	-0.256561	-0.419693	0.0507419	0.153671	0.384843	-0.104159	-0.113407	0.106934	0.303928	-0.405686	-0.0721984
94	0.985375	3.04903	0	0	0	0	0	0	-0.0816055	-1.46265	2.1581	-1.27046	-2.14746	-1.59724	0.559323	0.254648	-0.932403	-0.684311	-0.155665	-0.317531	-0.220637	-0.210435	-0.34651	1.05056	-0.325866	0.497741	-0.922617	-0.189863	-0.233709	0.146427	-0.0140996	-0.7538	-0.0753535	-0.216648	0.0138896	-0.618809	0.133056	0.00170849	0.708284	-0.304491	-0.00112494	0.0323701	0.11856	-0.603299	-0.25956	0.0716703	0.272443	-0.45873	-0.305471
95	0.920636	2.97702	0	0	0	0	0	0	-0.0257978	-1.10882	0.680108	-0.617544	-0.548112	-0.0107233	-0.0702035	-0.285971	-0.726198	-0.746869	-1.96331	0.341414	-0.0331192	0.230227	0.439363	0.160596	-0.361651	-0.085533	0.395102	-0.486506	-0.0377702	-0.617964	0.271555	0.152358	-0.471274	0.19662	-0.197202	-0.0885115	0.227382	0.223282	0.289329	-0.0881341	-0.0848056	-0.254989	0.0361194	0.0218518	-0.444509	-0.421138	-0.192644	-0.0355121	0.158873
96	0.940417	2.2171	0	0	0	0	0	0	0.0423894	1.46773	-1.60384	2.13099	-0.734451	-0.433945	-1.30753	-0.683256	0.13013	-0.512051	-0.415347	-0.825956	-0.531616	-0.158088	0.00781524	0.0244703	-0.0307283	0.186519	0.406409	0.933008	0.108846	-0.198308	-0.393974	-0.0515904	0.4501	0.0134135	-0.229337	0.345484	-0.0166376	-0.331177	-0.0550592	0.526426	0.0960777	-0.273062	0.0345918	-0.0492681	0.688488	0.255194	-0.119867	-0.0473323	0.343002
97	0.89562	2.99087	0	0	0	0	0	0	-0.0705901	0.981638	-0.392317	-0.219056	0.247102	-1.18708	-0.756891	0.747993	0.0432231	-0.0289151	0.469988	-0.125322	-0.729682	-0.0739752	0.606499	0.325989	-0.0150764	0.750983	0.246732	-0.269695	0.0820883	-0.13553	0.626837	0.148661	-0.121197	-0.358751	0.0435293	-0.0470887	-0.055289	-0.705587	-0.284998	-0.23812	-0.321902	-0.21553	0.357631	-0.148368	-0.555709	-0.402279	0.256481	-0.0619263	0.163831
98	0.946506	2.96441	0	0	0	0	0	0	-0.253847	-2.54834	-2.78401	-3.52407	-1.06941	-0.625307	-0.727797	-0.666847	0.0450682	0.303737	-0.614878	0.515717	-0.0431227	-0.860295	-1.02491	-0.911363	0.747009	-0.0871985	0.488414	0.250606	0.0529356	0.0207457	-0.0435883	0.0876076	0.252752	0.0265607	0.102017	0.283706	0.586564	0.157849	-0.430216	0.176201	-0.684494	-0.0575377	-0.32157	0.0199308	0.00381163	0.337816	0.144672	-0.247319	-0.0149356
99	0.956132	3.31288	0	0	0	0	0	0	0.0308491	-1.9792	-0.626748	0.226008	-0.933302	0.136638	1.20704	-0.138395	-0.241305	-1.29851	1.35494	-0.493892	0.748337	0.406373	0.643065	-0.0853012	0.399306	0.155902	0.0190286	0.266989	0.0179853	-0.0939852	-0.452292	0.111118	-0.491721	-0.0832086	0.166559	0.456677	0.148651	0.15055	0.122114	-0.172267	-0.41276	0.612093	0.112873	0.409026	-0.136584	-0.355597	-0.373058	0.0773642	0.143202
100	0.98686	3.24222	0	0	0	0	0	0	-0.0378902	-1.20691	0.0962406	-0.255047	-0.123668	0.612551	0.287323	-0.930882	-1.22379	0.821973	-0.188512	0.566988	0.272196	0.736891	-0.544234	0.164983	0.560081	-0.0968552	-0.316426	-0.802656	0.339368	-0.390012	0.290231	0.234028	-0.0402428	-0.0134457	-0.189539	-0.181858	0.120417	-0.140819	-0.0281485	0.191171	-0.165287	-0.103636	0.0360013	-0.13601	-0.396561	-0.457885	-0.0516877	0.161668	-0.0272125
101	0.918909	-2.9788	0	0	0	0	0	0	0.111825	-1.15007	0.186329	0.209714	0.87499	-0.918434	0.264688	0.784271	-1.2118	0.908664	-0.0415376	0.407139	0.290579	0.983998	-0.590254	0.274436	-0.507813	-0.211049	-0.14924	-0.10766	0.307772	0.0257054	0.217542	-0.0430873	0.0508407	-0.119894	0.492405	0.218394	0.0934052	0.0980073	-0.144414	0.118006	0.0222914	0.266531	-0.0395685	0.161085	-0.163585	-0.0878267	0.0520605	0.105682	-0.344443
102	0.94464	3.03647	0	0	0	0	0	0	0.0797219	-0.604348	-0.171835	3.15511	-0.0281443	-2.43947	0.819009	-1.28726	-1.19567	-0.00599626	-0.413727	-0.298701	-0.693235	-1.00543	-0.756581	0.622853	0.0223616	-0.575483	0.144774	0.358869	0.314905	-0.437765	0.482898	0.0908832	0.56607	-0.0516127	0.394784	0.29879	-0.0909263	0.308482	0.138649	0.716356	-0.590871	-0.00368321	-0.231173	0.0484313	0.253423	-0.264753	-0.0331358	0.396186	0.218887
103	0.940633	2.76715	0	0	0	0	0	0	-0.0425186	1.01978	0.957733	-0.983349	-0.43473	0.755137	-0.0967357	0.230777	-0.598781	0.472829	-1.02897	0.69784	-0.878219	0.0606078	-0.432457	-0.183137	-0.11556	-0.481803	-0.182395	0.239347	0.0714022	0.762377	-0.481938	0.549416	0.0471643	0.344993	0.25957	-0.143921	-0.0704885	-0.0755584	0.0959348	0.221399	-0.0606178	0.0823761	-0.0359592	-0.329544	-0.147767	-0.162545	0.372931	-0.112388	-0.306403
104	0.901984	2.83994	0	0	0	0	0	0	0.0426799	1.22771	0.27891	1.11748	-0.027797	-0.789549	-0.972617	-0.0738215	1.3178	1.61444	0.699353	-0.419282	-0.259953	0.873453	0.190731	0.582457	-0.337105	-0.264212	0.299836	0.310841	-0.493428	0.568495	-0.670239	0.129752	0.1025	-0.523098	-0.147768	-0.0383915	-0.0177175	-0.0442874	-0.0833955	0.194555	0.125458	0.238761	0.0488648	-0.0384232	0.0971318	0.189504	-0.0603818	0.0771014	-0.0176645
105	1.015	2.85925	0	0	0	0	0	0	-0.048151	0.980043	-0.511386	0.602962	-0.257547	0.916545	0.37004	-0.388811	-0.0669215	-0.0401537	-0.697655	-0.089845	-0.927939	-0.553286	-0.639268	-0.0182056	-0.219803	-0.0169273	-0.0989075	0.220267	0.034091	0.272234	-0.130105	0.136009	-0.240931	0.580137	-0.0801926	0.0844095	-0.216407	-0.089451	-0.0276331	-0.492542	-0.200854	-0.336122	-0.178434	0.0727343	0.0412658	-0.0990894	0.0994922	0.126601	-0.12435
106	0.976898	3.06428	0	0	0	0	0	0	0.0504422	-1.1239	-1.56105	2.83172	0.239596	-0.513643	0.122006	1.23287	-0.123603	0.193755	1.19892	0.315819	-0.123632	-0.386216	0.246909	0.363878	0.501126	0.210773	0.567931	-0.388972	-0.3988	0.310652	-0.446518	-0.17759	-0.294306	0.0502471	0.0175447	0.188236	0.26712	-0.204613	-0.131482	0.570767	0.202768	0.218671	0.106127	0.0903394	0.480456	0.234246	0.0275952	0.476088	0.0682468
107	0.928976	2.94234	0	0	0	0	0	0	-0.0321761	1.39193	-0.894169	-0.664561	-1.58421	-1.06682	0.70453	-0.0482284	0.636209	0.460678	-0.7257	-1.0368	0.818142	-0.0235013	0.575012	-0.701403	-0.252807	-0.449933	-0.631396	0.748759	-0.705898	0.149121	-0.36725	-0.27737	-0.516602	0.228063	-0.103893	0.0319756	0.0120563	0.013649	0.370362	0.40208	-0.0314736	0.133352	-0.00667277	0.207447	0.441846	0.556462	-0.0632021	0.40357	0.197694
108	0.971633	3.14015	0	0	0	0	0	0	0.0355499	-0.527399	0.641482	0.414147	0.85301	-0.0905035	-0.393577	0.350537	-1.12896	-0.268734	1.71883	-0.690071	0.232047	0.0706923	0.0386962	0.349191	-0.0333351	-0.0715555	0.104237	0.428348	0.132557	-0.259528	-0.200331	-0.00801744	0.321438	-0.216394	-0.082716	-0.290938	0.0281741	-0.137539	0.0416323	-0.293714	0.23967	0.00790669	-0.13842	0.0636114	-0.232998	0.0801682	0.0544215	-0.17652	-0.191318
109	0.842862	2.73377	0	0	0	0	0	0	0.140164	-0.191936	-2.24809	0.265396	-0.748353	1.7339	0.107859	-1.18847	0.0851058	-1.36555	0.336758	0.879169	0.460594	-0.198441	0.994586	-0.389061	0.028732	0.0260704	0.136698	0.698165	0.0393946	0.103081	-0.443022	0.360045	-0.316286	0.288269	-0.146813	0.27582	-0.0193018	-0.140762	0.109867	-0.332521	-0.498721	0.288985	0.512155	-0.146135	-0.256237	-0.214569	-0.355148	0.307564	-0.203981
110	0.876678	2.7794	0	0	0	0	0	0	0.0385127	-3.42315	1.42585	-0.565199	0.566737	-0.558449	-0.640036	0.306024	0.267907	-0.0274176	-0.487121	-0.125707	-0.790358	-0.196677	-0.432843	0.206033	0.180026	-0.192833	0.0699358	-0.811661	0.107481	-0.235344	0.37504	0.0130325	0.449288	0.250049	0.446867	0.422608	-0.0181529	0.139655	-0.483945	0.0247748	0.249255	0.000265549	-0.214113	-0.0072877	-0.298925	0.0472594	0.157773	0.102599	-0.375893
111	0.895634	2.53431	0	0	0	0	0	0	-0.0371843	0.946306	-2.65814	-0.33953	0.961949	-0.12491	0.0185535	1.50558	0.518758	-0.324606	1.10286	-0.212463	0.288591	-0.72343	0.638686	-0.44045	-0.0981837	-0.45671	-0.42085	-0.247664	-0.929393	0.791413	-0.331839	-1.0246	-0.478065	0.167452	-0.0158449	0.365027	0.0298615	0.347955	0.0824786	0.244432	-0.536592	0.279892	-0.164482	0.0931356	0.466037	0.543697	0.210659	0.127503	0.00325574
112	0.903076	2.73121	0	0	0	0	0	0	-0.0299415	-1.29061	-1.98432	-1.34623	0.765152	0.995013	0.479304	-0.525854	-0.14322	-0.710589	0.231632	-0.405385	1.53947	0.630129	0.0665651	0.0482631	0.584559	-0.0052954	0.259281	0.151435	0.165624	0.238255	-0.038651	0.409427	-0.50465	-0.0200694	-0.306209	0.0487467	0.585611	-0.224922	-0.408093	0.184947	-0.234035	0.176347	-0.2129	-0.143001	0.0973093	0.115773	-0.200861	0.197973	-0.283726
113	0.968613	2.88286	0	0	0	0	0	0	-0.132925	2.76356	0.0535382	-0.0294478	-0.741777	-0.781692	-2.05372	-0.262374	0.510544	0.0766851	1.07094	-1.06389	0.270809	0.566441	-0.825628	0.758301	-0.405641	0.473899	0.257151	-0.179993	-0.393799	0.612928	-0.364486	-0.150433	-0.0782928	-0.246697	0.154993	-0.318114	-0.0479141	-0.377605	0.17419	-0.159076	-0.0199272	0.420479	-0.550188	0.311069	-0.249064	0.112928	0.304012	0.139726	0.0020357
114	0.857662	2.90828	0	0	0	0	0	0	0.056794	-0.529806	0.704588	2.37326	0.302904	0.365662	0.616888	0.204852	-1.43334	-0.642092	1.36023	-0.0528339	-1.03626	-1.47004	-0.338516	0.246896	-0.520192	0.368602	-0.0919985	0.177906	0.103459	0.0571349	-0.414076	-0.0751802	0.2097	-0.181965	-0.24139	0.0107185	-0.17766	0.090763	-0.0392292	-0.172148	0.0822771	-0.0168448	0.0496718	0.326624	-0.270948	0.131636	0.275056	-0.395991	0.155435
115	0.878848	2.64629	0	0	0	0	0	0	-0.10756	1.68865	2.3697	0.101869	0.874609	-0.0466384	-0.0286512	-0.592799	0.268431	0.627013	0.00606261	1.56179	0.0651282	0.00941878	-0.132999	-0.357628	-0.343904	-0.0258074	-0.562399	-0.178634	0.040324	0.459322	0.0913726	0.114561	-0.0343709	-0.447077	-0.371325	0.130047	-0.502614	0.215056	-0.0636037	0.254529	0.477577	0.0929579	-0.0401302	0.343073	-0.111781	0.195976	-0.130967	-0.0901165	0.0279812
116	1.00811	3.29248	0	0	0	0	0	0	0.0265692	-2.06037	1.39959	0.914033	0.406974	2.15612	0.0963054	-0.178782	-0.0319644	0.103871	-0.316583	0.318467	1.06848	-0.552031	-0.25149	-0.300699	0.381819	0.0648993	0.214654	0.260021	-0.380951	0.339755	-0.425751	-0.462514	-0.412662	-0.176661	-0.187099	0.363614	-0.341164	-0.0510243	0.157863	-0.0957459	0.199759	0.368861	0.300365	0.353747	-0.811965	-0.822781	-0.166306	0.143567	-0.0775063
117	0.94807	2.61891	0	0	0	0	0	0	-0.0700583	3.68749	-1.31419	0.769344	-1.30488	0.848161	-1.76346	-1.2249	-1.21787	0.646381	-0.354391	0.86301	-0.248145	-0.178968	0.0344475	-0.414131	-0.276797	0.37354	0.327705	0.680674	-0.0707505	0.241292	-0.135725	-0.18092	-0.103164	0.258297	-0.175024	-0.219565	-0.231589	-0.552151	0.0786027	0.185624	-0.120755	0.181696	0.155502	-0.152898	-0.0338001	0.336895	-0.107473	0.116819	0.420435
118	0.830239	-2.80574	0	0	0	0	0	0	0.0796668	-2.12791	-2.01691	0.565384	-1.42792	-0.63228	0.433927	-0.488154	0.39928	0.0195607	0.160415	-0.682859	0.644309	-0.0138243	-0.0248574	0.247555	0.127148	-0.635988	0.469202	-0.265988	0.0999108	-0.198724	0.361412	-0.0643965	-0.291237	0.0911562	-0.214443	0.418497	0.329091	0.354749	-0.307125	0.206068	-0.54822	-0.189509	0.538824	0.191345	0.181817	-0.541913	0.305394	-0.371292	-0.30577
119	1.03534	3.35179	0	0	0	0	0	0	0.0103469	-0.117534	-1.62088	2.30035	0.418375	-0.594836	0.140308	0.424529	-0.342867	-1.12115	0.498962	-0.832926	0.592372	0.407293	-0.642957	0.364976	0.195408	-0.222234	-0.121394	-0.45312	-0.724181	0.727624	-0.562392	-0.114433	0.0530304	0.0190498	-0.0186596	0.363571	0.0274231	-0.106378	0.21235	0.235316	0.336552	-0.012459	0.0100439	-0.0489278	0.385941	0.510987	0.182394	0.176647	-0.2802
120	0.925893	2.52482	0	0	0	0	0	0	0.0998479	-2.19859	0.615671	-0.772985	-0.619065	3.0745	-0.898291	-0.5592	-0.456261	0.172012	-0.0169013	-0.150055	0.803357	0.652236	1.68803	-0.273533	0.720553	-0.179106	-0.550962	0.0723712	-0.1276	-0.0105199	0.254416	0.910244	0.0728732	-0.0675479	-0.334541	-0.231716	0.0727474	0.0616232	-0.0998313	-0.208388	0.262211	-0.0841877	0.00556045	0.0652083	-0.22692	-0.391258	-0.299308	0.182623	0.213719
121	0.924327	3.33904	0	0	0	0	0	0	-0.0230295	1.42239	1.84101	-0.527642	0.949611	-0.100595	-1.42771	0.539302	1.29363	-0.32342	-0.0433078	0.448264	-0.422768	-0.46523	0.513681	-0.0249333	-0.196878	0.671911	0.0663329	0.0377868	-0.255762	-0.25074	-0.180836	-0.0446601	-0.124529	0.490151	0.435337	0.0910369	-0.627107	-0.224978	0.405319	-0.41909	0.502819	-0.0254463	0.311501	0.237778	-0.329551	0.0877246	0.546894	0.149422	-0.123371
122	0.951521	2.7567	0	0	0	0	0	0	-0.077748	0.51764	0.561209	0.227758	-1.2079	0.0227642	-0.67736	-0.016499	0.130678	-1.2579	-1.48147	-0.193185	0.385141	-1.02508	0.500679	-0.161173	0.234053	0.408899	-0.110605	0.59518	0.211584	0.25595	-0.121382	0.0659217	0.409257	0.375829	-0.104972	-0.039115	0.155928	-0.245962	0.0936555	-0.194425	-0.11918	-0.223754	-0.168379	-0.0524524	-0.0731672	-0.046404	-0.0651256	0.0333822	0.144383
123	0.866045	2.66238	0	0	0	0	0	0	0.0884486	0.307448	-2.52576	-0.255355	-1.12244	-0.793412	-1.78467	-0.938999	0.268667	0.491365	0.450791	0.321793	-0.876018	0.969512	-0.0530278	-0.0661451	0.035561	-0.305971	0.85724	0.097985	0.0161785	-0.442568	0.174549	0.284276	-0.299922	0.248966	-0.13998	0.0148991	0.18815	-0.128998	-0.103783	0.0274867	-0.376123	-0.0547091	-0.194863	-0.0248333	-0.198007	0.0531442	0.291172	6.552e-05	0.125018
124	0.94411	2.3018	0	0	0	0	0	0	-0.0236034	2.10823	1.61098	0.151247	-0.688489	-0.483503	-0.023204	0.00121672	-0.676045	0.444634	-0.568759	0.30963	-0.305459	0.795915	0.192385	-0.982637	-0.347194	-0.188888	0.274416	-0.539773	0.135771	-0.0266647	-0.463901	-0.181645	-0.313988	0.248061	-0.276528	-0.468439	-0.699957	-0.247646	0.0744765	-0.134852	0.636175	-0.186366	0.201421	-0.0905787	0.20609	0.315763	0.4267	-0.647945	-0.104975
125	0.986848	2.48079	0	0	0	0	0	0	-0.00192621	2.31956	0.16419	0.512064	0.15916	0.34633	0.972314	0.304286	0.466838	0.457243	0.107166	1.09226	0.897037	-0.119793	-0.0493438	-0.149711	-0.931722	-0.407883	0.0403535	0.992635	-0.787649	0.810587	-0.495462	-0.395938	0.0815445	-0.0867406	-0.228679	-0.119783	-0.227482	-0.294128	0.213322	0.125583	0.0713523	-0.214478	0.227614	-0.0976946	0.296314	0.41015	0.19784	-0.475717	0.169058
126	0.962459	3.0837	0	0	0	0	0	0	-0.0554023	-1.40741	1.21242	-1.0086	0.552522	-0.404321	0.0398565	-0.450195	-0.0207313	-1.90289	-0.157192	1.3902	-0.791355	0.213371	-0.146568	-0.0895412	-0.00252788	-0.122794	-0.354197	-0.148338	-1.02738	0.25073	-0.545089	-0.253045	0.0296737	-0.203256	0.497397	0.012231	0.227742	0.131254	0.225957	-0.0818073	-0.120968	0.00446073	-9.13828e-05	-0.242725	-0.312202	0.0438805	-0.253199	0.243266	0.104708
127	0.892256	2.70152	0	0	0	0	0	0	0.0716653	-1.11424	-3.42849	0.973851	-1.41268	-1.24986	-1.22529	-0.433611	-1.69204	0.142908	-1.27408	1.03682	0.375663	-0.776416	0.388509	0.0747204	0.184594	-0.634145	0.0687648	0.118306	-0.0861721	0.292446	-0.273601	-0.167542	-0.390224	-0.621643	-0.495549	0.405047	0.626842	-0.0795438	-0.178871	0.511525	-0.580624	-0.247756	0.00990598	0.0404837	0.10392	-0.00407737	-0.169957	0.131497	-0.391379
128	0.994132	3.30655	0	0	0	0	0	0	-0.00143354	1.12764	-1.67003	0.0728733	1.79592	0.975337	-0.171272	-0.295362	-0.103883	0.15365	1.25537	1.11557	0.484598	0.0259554	0.0560218	0.310994	-0.0222648	-0.0123151	0.223593	-0.302691	0.157354	-0.497411	0.121648	0.199964	0.669069	-0.228709	-0.000654435	-0.106686	0.129094	-0.35033	-0.0785967	-0.0135178	0.0987068	-0.29919	-0.0160872	-0.231205	0.0529865	0.207128	-0.199489	-0.0407348	-0.0758206
129	0.913375	2.98441	0	0	0	0	0	0	-0.164381	-2.23868	-0.594253	0.0710278	-1.57081	0.707001	-0.435522	-1.80794	-0.156068	-0.61979	0.470247	0.155577	0.745807	0.267445	-0.00385979	0.170747	1.26004	1.18369	-0.357183	-0.207367	0.0258019	-0.244521	-0.746766	0.398672	-0.450494	0.122458	-0.0823859	0.120798	0.292674	0.376603	-0.0102983	0.0574769	-0.535733	0.0585037	0.0664768	0.2084	0.33276	-0.26005	0.0452199	0.132957	-0.307262
130	0.857647	2.86607	0	0	0	0	0	0	-0.12224	-0.410116	0.0403058	-2.64693	-1.72176	1.35633	2.09088	0.911896	1.05529	0.424735	-0.994628	0.469149	-0.300188	-0.0727163	0.131246	-0.598596	0.457537	0.121686	0.602473	-0.381226	-0.133311	0.636186	-0.452031	-0.578287	-0.0163231	0.656418	0.0757774	-0.41624	0.420114	-0.060318	0.130427	-0.490808	0.074517	-0.222696	0.225273	-0.331939	-0.0109017	0.0734838	-0.198372	-0.361925	0.0821239
131	0.981751	2.8399	0	0	0	0	0	0	0.147738	-1.01235	-3.0802	2.44368	-1.22231	0.483409	0.322351	-0.560375	-0.579256	-1.57645	0.999895	-1.31813	-0.803355	0.0402662	0.0250133	0.609753	0.262696	-0.347417	-0.29564	-0.117766	-0.393767	-0.0193771	-0.107822	0.38847	0.0449493	0.255679	-0.507881	0.381966	0.224513	0.124088	-0.170685	-0.219258	0.033644	0.0110112	0.52457	0.172988	0.627778	-0.130328	-0.404976	-0.0176623	-0.0379788
132	0.938808	3.76216	0	0	0	0	0	0	0.0505408	0.483629	-2.15885	-0.104842	-1.6863	0.803958	-1.27842	-1.59254	-0.0856779	-0.818339	-0.498217	-0.372316	0.632006	0.146021	-0.028669	0.917974	-0.280387	0.358657	0.80058	0.125331	0.426005	0.0924317	-0.0427248	-0.0407401	0.011188	0.403048	0.12548	-0.0472673	0.0581407	0.382552	-0.0367702	0.029157	0.140604	0.348298	0.522773	0.262938	-0.369459	-0.0669778	-0.407765	0.00904021	0.3791
133	1.00921	-3.50142	0	0	0	0	0	0	0.0340075	0.31791	0.145205	0.0178879	-1.23873	-2.11025	-0.524359	0.302765	1.34811	0.426505	-0.31329	-0.98679	-0.660657	-0.267982	0.524825	-0.409876	0.480327	0.0632932	0.616912	0.661007	0.194629	0.562764	-0.487604	0.258746	-0.415496	-0.527001	-0.488593	0.166774	-0.0180625	-0.0365987	0.0525604	0.0930442	-0.156523	-0.045973	0.00906178	0.19163	0.368353	0.201672	-0.0779013	-0.266784	-0.0784518
134	0.970612	2.78083	0	0	0	0	0	0	0.0420773	2.22743	-0.276527	0.386876	-0.146828	-0.741167	0.508673	-0.21067	0.984863	0.17315	1.115	0.213449	-0.933489	-0.228306	0.314909	0.209613	0.073143	-0.253934	0.77777	0.0477558	0.201427	-0.0140045	0.0810612	-0.0181279	0.207163	0.270787	0.158421	-0.227626	0.0485354	-0.212474	-0.387806	0.288617	-0.182257	0.0409128	-0.284524	-0.0128091	0.336599	0.333808	0.157461	0.460673	0.520069
135	1.01306	3.64823	0	0	0	0	0	0	0.0598247	-2.24466	-2.30069	0.531628	0.542075	-1.83661	-0.113519	0.402275	-1.48359	0.2938	0.112895	-0.500348	-0.431055	0.249242	0.526021	0.0818453	-0.294434	-0.135284	0.426472	0.0875204	-0.274914	0.010222	-0.394713	-0.445342	0.159731	0.213947	0.445392	0.0472704	0.53001	0.332644	-0.0537305	0.113726	-0.482938	-0.229527	0.187018	0.00555567	-0.0527977	0.23523	0.0745272	-0.0283164	0.221976
136	0.901002	2.71473	0	0	0	0	0	0	0.0266088	-0.368499	-2.2322	-0.07802	1.27572	-0.11111	0.463071	1.35317	0.21692	-0.303255	0.790681	1.44254	0.407091	-0.155846	0.587344	0.493657	0.52592	0.35556	0.479152	0.0555648	-0.272888	0.404814	-0.032812	-0.209161	0.352258	-0.0739279	-0.14394	0.178039	-0.13117	0.0999656	0.277416	0.0347802	-0.652743	-0.0130505	0.339602	-0.538836	0.358713	0.403455	0.200576	-0.138344	0.139035
137	0.852872	2.80582	0	0	0	0	0	0	-0.11605	0.937588	-2.54905	-0.418964	-0.184711	-1.39465	-0.668461	-0.448789	0.437299	0.150286	-0.267681	0.364659	0.126296	-0.327931	-0.113522	0.126304	0.789769	-0.205251	0.158713	-0.395697	0.0814979	0.300418	0.216947	-0.537702	0.236121	-0.185637	0.22945	-0.145425	0.525209	-0.0712483	0.0437966	0.476612	-0.672891	-0.0767363	-0.105105	-0.207549	0.537876	0.327212	-0.119062	-0.0277839	0.088218
138	0.897696	2.75907	0	0	0	0	0	0	-0.0483274	1.26565	-0.0265694	1.63922	-0.240466	1.05497	0.0673725	0.309692	-0.188527	-0.510309	-1.08547	0.929666	-0.0865536	-0.726899	-0.145248	-0.858774	0.333312	-0.0450514	-0.563083	0.0888306	-0.345095	1.2158	-0.116088	-0.249869	-0.111622	-0.0877358	0.537627	-0.0591937	-0.0382451	-0.368492	-0.301101	-0.00271781	0.391507	-0.321537	0.198243	0.0999658	-0.0910998	-0.138249	-0.253808	-0.318411	-0.269688
139	0.950257	3.18452	0	0	0	0	0	0	0.0452117	-1.34841	0.596343	0.309813	1.17546	-0.487742	0.470679	-0.0851888	1.65948	0.675136	-0.623841	-0.418525	-1.40223	-0.141102	-0.0295474	-0.123688	0.0531833	0.14442	-0.65846	-0.168406	0.249594	0.16778	-0.103306	-0.00669959	0.0522307	-0.201068	0.0320926	-0.232416	-0.101897	0.22097	-0.317966	0.226558	0.0947802	0.0302266	-0.00496813	0.642871	0.197598	0.0693754	-0.275709	0.182251	0.0130792
140	0.943027	2.81188	0	0	0	0	0	0	-0.0387399	-0.975482	-0.442188	1.34975	1.16229	1.08151	0.305789	-0.0944825	0.482729	-0.393272	0.396806	1.73046	0.689338	1.37394	-0.0038261	-0.0325548	-0.0634182	0.915827	0.202781	0.139403	0.418684	-0.589028	0.287859	0.308768	-0.294194	0.171627	-0.172227	0.331989	-0.0467888	-0.0245731	0.295013	-0.731304	-0.581018	-0.255108	0.0319763	0.178717	0.112255	-0.289945	-0.115452	-0.517562	-0.391369
141	0.973315	3.03972	0	0	0	0	0	0	0.103753	-0.466427	-1.96969	-2.76351	0.0317773	-0.984887	1.44533	-1.01877	-0.245243	0.919492	-1.41807	-0.0778188	0.122434	-0.267471	0.242349	0.0588262	0.10973	-1.26105	-0.033854	0.346872	0.0218234	0.0938913	-0.134331	0.0553767	-0.0327585	0.0932964	-0.0624442	-0.0608998	0.860372	-0.247922	-0.159088	0.0371788	-0.148069	-0.439437	-0.422715	0.0656874	-0.0182554	0.111474	-0.207788	-0.208965	-0.294563
142	1.00194	4.59736	0	0	0	0	0	0	0.0992013	-1.55851	-0.505757	2.58899	-0.90903	0.334036	-0.0443737	-1.419	0.0948975	0.567099	0.441896	0.470695	-0.139899	0.342068	1.00624	-0.144451	0.284887	0.288599	-0.181907	-0.645644	-0.252245	0.0181127	-0.181885	-0.191141	0.193252	0.0688227	-0.37888	-0.264571	-0.144324	0.410071	0.44949	-0.213824	-0.504094	0.479746	0.0971786	0.369391	-0.352424	0.149681	0.228647	-0.022747	0.20687
143	0.944348	2.4995	0	0	0	0	0	0	-0.0614004	0.770624	1.89418	-1.37128	0.988182	1.07742	-0.780426	0.996572	-0.833652	-0.620644	-0.362255	-0.217314	0.0369632	-0.158001	0.23485	0.234183	-0.37924	-0.0944113	0.699218	-0.230522	0.51623	-0.191589	0.158302	0.195286	-0.352898	-0.285064	-0.221973	0.0343594	-0.808443	-0.235906	-0.0735189	-0.619471	0.537535	-0.224208	0.0278571	-0.509873	-0.00658233	-0.0795094	-0.059967	-0.17967	-0.0539457
144	0.961972	3.68027	0	0	0	0	0	0	0.0396372	-4.61517	1.05114	1.87101	-0.639984	1.38791	-0.500737	0.180438	-0.336265	-1.59205	-0.674593	-0.0642828	0.553325	0.333038	-0.411431	0.650802	-0.271766	-0.389661	0.177684	-0.0438757	0.232206	0.0736394	-0.106511	0.189555	0.27347	-0.508104	0.278907	-0.292588	0.0531016	0.281706	-0.0387441	-0.0291944	0.121903	0.312414	0.112013	-0.257168	-0.542001	-0.235945	-0.189305	0.187987	-0.0982117
145	0.941896	2.69686	0	0	0	0	0	0	-0.0643786	1.43412	2.56354	-2.1522	0.539488	1.5614	-0.081934	-0.198232	-1.61745	-0.864666	0.198633	0.17764	-0.0656987	0.338972	0.168574	0.19328	-0.350791	0.368567	0.70759	-0.558996	0.0426533	0.180284	0.158994	-0.650283	0.349668	0.121381	-0.0660664	-0.44717	0.0691044	-0.22115	0.204159	-0.554498	0.152249	0.58613	0.0491022	-0.375596	-0.176607	-0.0906039	-0.306007	0.320736	0.210995
146	0.952817	3.18218	0	0	0	0	0	0	-0.0691873	-0.417766	0.317524	1.23263	0.406732	-0.480677	-1.07893	0.656814	-0.195333	-0.622404	0.222567	0.860549	-0.204461	-0.080615	-0.392818	-0.0989739	-0.203212	0.291001	0.630816	0.0682227	0.0223694	0.0605797	-0.0315774	0.252391	0.37346	-0.224233	0.105314	0.405065	-0.0597793	-0.329196	0.0213695	0.183719	-0.440185	-0.240822	-0.153459	0.164158	0.129474	-0.285268	0.338385	0.031157	-0.338119
147	0.926469	2.50566	0	0	0	0	0	0	-0.00997308	0.770823	-0.89321	-1.04524	1.21157	-0.0452631	0.136518	0.574643	0.996772	0.732829	-0.79047	0.581218	-0.62232	-0.384257	0.153634	-0.475137	0.447078	-0.111575	-0.185245	-0.112807	-0.620895	0.155193	0.257178	-0.0086922	0.310893	-0.102603	-0.153361	-0.25708	0.189471	0.0885032	-0.124732	0.861796	0.162799	-0.00132727	0.190417	-0.233332	0.569713	0.204935	0.0494961	0.162472	0.497758
148	0.931699	2.88202	0	0	0	0	0	0	0.00972539	-1.54823	0.0832826	1.26758	-0.819101	-0.469146	-0.526563	1.60532	-0.372438	0.0909871	-0.516436	0.349573	0.199399	1.01654	-0.690209	-0.235921	-0.215824	0.1988	0.151547	-0.207919	-0.00430743	0.058777	-0.436894	-0.548336	0.113357	0.529364	-0.313782	-0.485393	0.519793	-0.208488	0.221071	-0.353067	-0.0734842	-0.450866	0.083998	0.165105	-0.150405	-0.307477	0.116799	-0.401673	-0.23582
149	0.978993	3.9438	0	0	0	0	0	0	-0.0424838	0.184102	-2.78025	-1.37052	-0.501513	-0.1048	1.94857	1.42426	0.695305	-0.3615	-0.510501	-0.0437145	0.267395	-0.542732	0.00694882	-0.253346	1.5409	-0.26361	0.224341	0.103912	-0.24481	0.0370601	0.139269	-0.294133	-0.4619	-0.169027	-0.131105	-0.090166	0.0810911	0.0453708	-0.396418	0.0169139	-0.466405	-0.302043	-0.430987	0.0756799	0.602566	0.203798	-0.243508	-0.350247	0.295665
150	0.815279	2.50945	0	0	0	0	0	0	0.0510363	1.04268	-1.25741	-0.0462286	0.379853	-0.996039	0.578219	-0.16447	-0.105051	0.68392	0.450557	-0.0415909	1.0676	0.557332	0.114379	-0.861464	-0.41316	0.004633	0.0494635	0.34852	0.612564	-0.0468198	-0.0250514	-0.013649	-0.369889	-0.0160344	-0.523502	0.172178	0.135143	0.271799	0.143119	0.434739	-0.315923	-0.0698269	-0.102863	0.185917	0.0746111	0.340273	-0.13013	-0.0485074	-0.0126926
151	0.962314	2.63068	0	0	0	0	0	0	-0.0780985	1.44751	-3.03498	-0.26214	-2.13633	1.1443	-0.705095	-0.599098	0.0773549	-0.663193	0.356168	-1.05803	0.124707	0.941918	-0.859719	0.322911	-0.263282	1.12395	0.776325	0.838361	0.0506176	-0.385907	0.0585124	0.0837942	-0.502369	0.187086	-0.195832	-0.399364	0.301368	0.0154445	-0.34753	-0.652857	-0.429266	0.181073	0.100945	0.220721	0.0766519	0.211306	0.0916246	0.155637	-0.303215
152	0.950427	2.74403	0	0	0	0	0	0	-0.0811565	1.45324	0.246248	-1.82863	-0.68665	-0.0295093	-1.27487	-0.294299	-0.205105	-0.163251	-0.40443	-0.322723	-0.883605	0.555393	0.650641	-0.284904	0.2665	0.208018	-0.767105	-0.471756	0.59291	-0.345878	0.325298	-0.355138	-0.342453	0.296172	-0.0862633	-0.148771	-0.13684	0.193202	0.0829731	0.155705	-0.0856606	0.320279	0.14046	-0.369121	0.0888356	0.15296	0.162865	0.200078	-0.124553
153	0.878317	-3.12231	0	0	0	0	0	0	0.00617197	-1.60652	-0.852174	-1.14342	1.09065	1.62546	0.0373556	1.58618	-0.812936	0.389653	0.1369	0.628209	0.0759401	0.364929	0.148287	0.0342952	0.36912	-0.528346	0.172482	-0.427072	-0.0874215	0.136698	0.0443858	-0.286575	-0.147439	0.524629	0.252217	-0.155237	0.0542757	0.212655	-0.14041	-0.109151	-0.276283	-0.100714	0.0303113	0.27759	0.0171852	-0.154034	0.167222	0.165093	-0.0918634
154	1.01728	2.90238	0	0	0	0	0	0	0.128593	-5.59469	1.98279	2.87408	1.34762	1.03169	-0.879665	-0.506799	-0.390193	1.00847	0.825088	-0.166524	0.115862	-0.0940916	-0.787262	0.416747	-0.120956	-0.331015	-0.554844	0.75438	0.493876	-0.351152	0.255466	0.174629	0.235366	0.165872	0.106575	0.184557	-0.413576	0.250341	-0.388355	-0.416686	-0.0658161	-0.183081	0.844607	0.0749151	-0.654016	-0.836599	-0.332723	-0.135294	-0.266962
155	0.989312	2.62912	0	0	0	0	0	0	-0.108287	0.674694	0.20202	0.00898022	0.894307	0.964571	0.489702	0.447625	-1.02466	-0.237025	-0.258417	1.69518	0.235862	0.527381	0.44213	-0.0247211	-0.211917	0.421927	0.571505	0.16058	0.668881	-0.783497	0.768933	1.05146	-0.140873	0.0837435	0.0122012	0.375402	-0.499483	-0.230206	-0.0256036	0.114616	0.501727	-0.0375263	0.188006	-0.452872	-0.0779756	-0.0551475	0.0301647	0.50613	0.253802
156	0.957026	2.91563	0	0	0	0	0	0	-0.0292697	0.329721	-1.90268	-0.559747	2.17626	0.511064	0.0912974	1.02552	-0.743655	-0.0529599	-0.352748	0.313336	-0.645403	-0.109138	-0.285787	0.390939	0.0826282	0.42489	0.0307216	-0.317009	-0.387386	0.234348	-0.42528	0.0311751	-0.501265	0.417157	-0.19786	-0.307396	0.123117	-0.206828	-0.105062	0.00461823	0.091443	0.0905549	0.182963	-0.0953498	0.208173	0.139784	-0.248615	0.00768034	0.216309
157	0.89022	3.44734	0	0	0	0	0	0	-0.00774936	-2.74215	0.604278	-1.12866	-0.832567	0.452978	0.0791976	0.676376	1.22765	-0.198751	0.35754	2.1119	-0.233296	0.631614	-0.699113	-0.173644	-0.387876	0.0505692	0.384462	-0.100951	0.00546505	0.551365	-0.557177	-0.114635	-0.0174364	-0.0332726	0.20918	0.0335253	0.355822	0.00514102	-0.310853	-0.305065	-0.430411	-0.186351	0.0742564	-0.178989	-0.37625	-0.334097	0.522628	-0.438513	-0.296523
158	0.931251	3.26753	0	0	0	0	0	0	-0.0591873	-0.962625	1.66724	-0.831583	0.661065	-0.46819	0.622949	-1.25915	0.00292623	0.126176	-0.486404	-0.13586	0.0223221	-0.214854	0.8848	-0.771518	0.338867	0.245781	-0.393579	-0.0173375	-0.570623	0.183914	-0.475012	0.382555	-0.174472	-0.0133206	-0.51956	-0.239139	-0.478908	0.411511	0.566773	-0.086383	0.0154205	-0.142862	-0.0525594	0.490734	0.0541301	0.392084	-0.454248	0.0503672	0.171607
159	1.02499	3.19745	0	0	0	0	0	0	0.0970156	-0.26215	0.245249	-0.0464776	-1.33565	0.751935	-1.14897	1.18215	1.31813	-1.30257	0.642417	-0.410691	-0.0211998	-0.0707507	0.310474	0.901164	1.22167	0.156632	-0.93959	-0.480513	0.273949	0.00939035	0.761898	0.37937	0.126842	0.497214	0.140105	-0.451697	0.00986969	0.0659742	-0.118564	-0.106879	-0.106756	0.0119953	0.157983	0.155347	-0.138458	-0.65339	0.099976	0.105273	0.0664382
160	0.96484	3.14224	0	0	0	0	0	0	0.0155557	0.0311914	-1.27296	0.338716	-0.316646	-1.17349	-0.637589	-0.377037	-0.43077	-0.51236	-0.132158	0.699426	-0.443977	-0.649144	-0.0568546	-0.465541	0.0561097	-0.116258	0.0143221	0.0696766	0.00744411	0.419329	-0.215551	0.0781422	-0.102961	-0.330184	-0.193843	0.484416	0.628339	-0.234222	-0.29968	0.518956	-0.0204652	-0.2245	0.109543	0.278811	0.112975	0.0148391	-0.115012	0.129792	0.0634095
161	0.866588	3.32648	0	0	0	0	0	0	0.0947944	0.941201	0.39211	1.34091	0.467652	-1.5327	-0.121923	-0.636415	-0.0575894	-0.667866	-0.0789625	-1.02198	0.698176	-0.159038	0.249644	-0.465015	-0.131221	-0.470497	-0.0564127	0.0791693	0.170978	0.00371929	0.0239518	-0.363461	0.327477	-0.038261	-0.063942	0.120472	-0.240569	0.290165	0.419985	0.377924	0.186649	0.0536468	0.310692	-0.0841215	0.070993	-0.0514047	-0.0499733	0.0991171	0.447273
162	0.900537	2.91849	0	0	0	0	0	0	-0.0603059	-0.301739	0.0829079	0.409091	0.936605	1.1323	-0.660453	-0.7472	-0.404153	-0.0277298	-0.177256	0.377443	-0.101945	0.541163	-0.162104	0.470209	-0.710009	0.296562	-0.0901291	0.0598687	0.870627	-0.7641	0.950957	0.367048	0.460269	0.515079	0.0702494	-0.0860146	0.100351	0.306199	-0.487959	-0.088095	0.00965657	-0.0230631	0.555364	-0.0935047	-0.491199	-0.320993	-0.276974	0.0320663	0.251734
163	0.981707	3.93712	0	0	0	0	0	0	-0.0234139	1.35061	0.568533	0.464558	-0.482244	-0.440645	1.32408	-0.839934	-0.766464	0.283671	-0.659247	1.26494	-0.00639484	-0.626607	-1.03951	-0.525585	-0.495594	0.491592	-0.167053	-0.242682	0.74805	-0.735125	0.558212	0.361718	0.184498	-0.203065	0.346333	0.0114842	0.096864	-0.15917	-0.118334	0.0427008	0.175373	-0.320346	-0.0449215	-0.410135	-0.159164	0.32007	0.293679	0.232617	-0.1666
164	0.967904	2.86718	0	0	0	0	0	0	-0.194336	-1.71335	-1.52812	-1.98505	1.02265	-0.668005	-0.10178	0.709322	0.187744	0.23643	1.07443	-0.176014	-0.117432	-0.113299	-0.175292	-0.131138	-0.458855	0.359056	0.319896	-0.246011	-0.0595645	-0.25569	0.391111	-0.305204	0.151601	-0.0867137	0.0934688	0.26975	0.103858	0.506589	-0.0319491	-0.180552	-0.575446	0.0624317	-0.441861	0.0416362	-0.0844085	0.556713	-0.0294411	0.126422	0.24843
165	0.898178	2.81232	0	0	0	0	0	0	-0.00627042	-3.34741	1.06081	-0.0887481	-1.1446	0.928094	-0.706736	-0.482144	0.758669	-0.446787	0.0226074	0.677751	-0.432283	0.0054809	-0.0760698	0.216774	0.306021	0.175193	-0.550254	0.211472	0.65249	-0.320547	0.167706	0.392607	-0.309693	0.223339	-0.122321	0.101421	-0.013229	0.426259	-0.111891	-0.00268148	-0.474324	0.287559	0.231614	-0.221917	-0.413754	-0.460024	-0.213197	0.145742	0.109854
166	0.912376	3.15055	0	0	0	0	0	0	-0.0516447	-0.539222	-2.47831	-1.7895	2.28521	0.0270625	0.506937	-0.537526	0.541366	0.976824	0.0194254	1.43737	0.386559	-0.294832	-1.33333	0.193709	0.184566	-0.473388	-0.0827823	0.106936	-0.418008	-0.357108	-0.360559	-0.00654938	-0.542574	0.40648	0.511553	0.286417	0.41579	0.0730745	-0.33088	0.0817319	-0.409049	-0.0868563	-0.333336	0.271041	-0.0293865	0.200912	0.382425	0.275984	0.0208256
167	1.03229	3.62814	0	0	0	0	0	0	0.124631	-0.532658	-1.82106	-0.258376	1.04622	-0.270114	-0.114379	-1.33599	0.980972	-0.348286	0.853285	-0.537651	0.949047	-0.0484483	0.447318	1.41292	0.122666	-0.201691	0.345048	0.311148	0.392865	-0.33558	0.559309	0.0586318	-0.039225	0.0462959	0.149776	-0.212765	-0.232034	0.0227263	-0.147595	-0.259934	-0.377523	0.0899187	-0.000442294	-0.289817	-0.754343	-0.17544	0.0440175	0.029457	0.508995
168	0.956572	-3.0947	0	0	0	0	0	0	-0.0668008	2.59921	-1.24794	0.10585	0.220861	-0.333113	0.939313	0.0859521	-1.4515	-0.0711717	0.619751	-0.618148	0.518504	0.321786	-0.531224	0.993309	0.522539	-0.10373	0.292974	0.0628133	0.161406	-0.0300787	-0.00989484	0.476295	-0.300125	0.056986	0.120121	0.57147	-0.367477	-0.404243	0.435872	0.105789	0.237282	0.219253	-0.0717082	-0.623443	0.342225	-0.0234095	0.132016	0.0546904	-0.257954
169	0.970044	-2.57028	0	0	0	0	0	0	0.215612	-2.61191	-1.72769	3.33703	1.09134	-0.733517	-0.839138	-0.38761	0.205676	-0.0342598	-0.508693	0.243453	-0.644424	-0.0280109	0.481799	0.533454	0.30595	-0.533443	0.477351	0.225501	0.570374	-0.463613	0.552021	0.576118	0.459301	0.515272	-0.102567	0.333475	0.322506	0.134125	-0.116066	-0.333365	-0.259751	0.185996	-0.00735305	-0.0320173	-0.326078	-0.3935	-0.00920493	-0.173392	-0.19245
170	0.902524	-2.96297	0	0	0	0	0	0	-0.203913	1.81303	-0.167053	-3.21301	0.123906	-1.04154	0.0400898	1.34036	0.183095	0.707607	0.595732	-1.079	0.903908	-0.543821	0.396303	0.187683	0.644009	-0.446267	-0.00231004	-0.207982	-0.37111	0.125046	0.188741	-0.113407	-0.597299	0.163262	0.481995	0.314749	-0.604418	0.288862	0.559786	-0.103213	-0.0847844	-0.0945784	-0.599103	-0.036174	0.360823	0.308678	-0.236377	0.0922815	0.310969
171	0.971363	2.74933	0	0	0	0	0	0	0.00656865	0.57394	-0.290942	-0.239446	0.147184	-0.545445	0.352645	-0.552799	1.41813	0.576543	0.554897	-0.332893	0.854434	0.186905	-0.276093	0.0449548	-0.376169	0.349271	0.0685923	0.691399	0.273745	-0.547719	0.916817	0.371433	-0.00679	0.09363	0.155638	-0.0165876	-0.103174	-0.304582	-0.229182	0.259583	0.408042	-0.147179	-0.594788	0.214127	-0.135785	0.658446	0.29956	0.423502	0.0766243
172	1.001	3.6217	0	0	0	0	0	0	-0.057187	-0.838948	-0.381931	-1.55928	-0.711129	-0.686643	-0.515551	0.250938	-1.48545	0.0505811	-0.311261	0.300081	-0.137391	-0.452075	-0.243681	-0.683114	1.21561	-0.168086	-0.676641	-0.606799	-0.879439	1.04126	-0.84225	-0.324275	-0.305112	0.0843736	0.346307	0.112952	-0.176376	-0.306417	0.0960251	0.259658	-0.145655	-0.36588	0.138394	-0.032036	-0.0366068	-0.185494	0.00107299	-0.166534	0.329099
173	0.982074	3.35841	0	0	0	0	0	0	-0.113716	0.898505	-0.878913	-0.566486	0.936697	-0.480949	-0.510792	1.13015	0.243336	-0.449003	0.872474	0.720116	1.10658	0.773015	-0.410164	0.120113	0.314301	0.726291	0.562554	-0.479968	0.205744	0.11025	-0.176211	-0.454827	0.360667	0.0413672	-0.153584	-0.163602	-0.162231	0.272215	-0.0707823	-0.397111	-0.126796	0.00676812	0.143423	0.138042	-0.0443743	0.1136	0.263158	0.00494537	-0.347743
174	0.950004	2.94693	0	0	0	0	0	0	-0.118952	4.46269	4.1812	-0.989246	0.520161	0.229591	-2.06307	-1.90729	-0.68299	0.204929	-0.692411	0.783174	0.0957083	0.466594	1.26872	-1.17836	-0.0274007	0.500797	0.450252	-0.534964	0.133117	-0.202649	0.104597	0.315675	-0.331925	0.289506	0.0144533	-0.423895	-0.421706	-0.61443	0.291974	-0.39158	0.806032	-0.00198611	-0.0580172	-0.41219	-0.608321	-0.0485838	0.0523004	-0.0497525	-0.112515
175	0.984089	2.85871	0	0	0	0	0	0	-0.0751874	-2.32811	-1.662	-0.560173	0.939927	-0.310348	-0.468374	-1.00016	0.704944	-1.06267	-0.868225	-1.81754	-0.132365	-0.266825	0.0404811	-0.00120079	0.263857	-0.143221	-0.323061	-0.00549252	-0.396518	0.0744619	0.104524	-0.44046	-0.276989	0.295542	-0.232105	-0.0708963	0.136565	0.436653	-0.455944	-0.236456	0.0887082	-0.40506	-0.0141452	0.329705	-0.450932	-0.382028	-0.168646	0.0343167	0.297297
176	0.951593	-3.14779	0	0	0	0	0	0	0.0057914	-1.78163	-0.162228	2.22725	-2.411	-1.20119	-0.216101	0.349027	0.436198	0.0185409	-0.778101	-0.556911	0.178908	-0.393496	0.185191	-0.10471	0.586789	0.304438	-0.410884	0.134749	-0.110217	0.217182	-0.268409	0.00238947	-0.0560463	0.231633	0.0427602	-0.417139	-0.138078	0.052884	0.715671	0.236207	-0.303037	0.135255	0.362128	0.279402	0.119346	-0.0495832	0.132599	-0.0659228	-0.296806
177	0.917667	2.64656	0	0	0	0	0	0	0.100541	-3.13747	-1.47211	0.150785	0.797828	1.48493	-1.03257	-0.107749	-0.982834	-0.801463	-0.679064	-0.62567	0.0131384	-0.774575	-0.330819	0.108034	0.0142814	-0.330913	-0.0509203	0.248194	-0.241066	-0.0777474	0.00513826	-0.0703349	-0.75844	0.192282	0.0614257	0.52876	0.266676	-0.0369095	-0.258209	-0.0802245	-0.381113	-0.0992278	-0.0497547	-0.462341	-0.361017	-0.308149	-0.121452	0.0826293	-0.0425048
178	0.957653	4.19536	0	0	0	0	0	0	0.162217	-1.17626	1.14688	2.2778	0.23489	0.166071	-0.13101	0.156037	0.43638	0.663039	-0.130127	-0.595454	1.43269	0.243557	0.0316292	-0.150805	0.77942	-1.00716	-0.120725	-0.591153	0.186122	0.279624	-0.189485	0.298795	0.0196247	-0.257997	0.344642	-0.500448	0.305994	-0.198082	0.235298	-0.0376946	0.151081	-0.107128	-0.324045	0.199276	-0.268413	-0.383857	-0.257419	-0.00318317	0.249567
179	0.985952	2.96036	0	0	0	0	0	0	-0.0676117	1.61548	-1.73572	-2.37642	1.37508	-1.08414	-0.592295	0.382581	-0.139973	0.114996	0.0374028	0.084928	-0.270598	-0.159375	-0.0539662	-0.961347	-0.369105	0.348982	-0.73314	-0.527527	-0.521091	0.500548	-0.0348068	-0.0925709	0.155743	-0.100926	-0.491431	0.641053	-0.141188	-0.133102	0.234938	0.114692	-0.126874	-0.238511	0.091293	0.0832711	-0.172425	0.112673	-0.279184	-0.0996327	0.199529
180	0.903588	2.88828	0	0	0	0	0	0	0.131698	0.183073	0.399799	2.00367	1.25727	0.587222	-0.501755	1.51497	0.324115	1.28236	-1.24407	-0.0772706	-0.186244	-0.627406	0.121645	0.666989	-0.0431164	0.0253749	0.44919	0.430315	0.45093	-0.126814	0.157105	0.0619015	0.308549	0.222522	0.0199655	-0.138775	-0.155444	0.174486	0.180028	0.00353091	0.282479	-0.344073	-0.0249806	0.0567233	0.00455419	0.0831999	0.116872	-0.0930706	0.123374
181	0.998921	3.24819	0	0	0	0	0	0	-0.0295293	-1.88419	-1.08798	-0.107273	0.592912	-1.76589	0.107873	-0.321063	1.04029	-0.0636487	0.304525	1.92784	-0.774739	0.749168	-0.0744036	0.382897	0.601035	-0.100681	0.101598	-0.36311	0.060583	-0.269206	-0.0292525	0.524915	-0.256941	-0.0171537	-0.370363	0.26654	0.387139	-0.0098882	0.0108784	0.109079	-0.169892	-0.788207	-0.191012	0.36292	0.116587	-0.0289363	-0.238378	-0.095635	0.124561
182	0.97398	3.02025	0	0	0	0	0	0	0.0872555	0.886407	-1.15741	-0.379859	-0.486003	0.440372	-0.181808	-0.170923	-1.42045	0.682053	-0.596173	-0.503933	0.221058	0.698325	0.0918489	-0.211544	-0.829307	-0.221445	-0.261617	-0.0345495	0.294725	-0.424331	0.395731	-0.18121	-0.0133515	-0.178267	-0.299777	0.356809	-0.220186	-0.0270803	0.175651	0.179524	-0.240029	-0.22825	-0.0930685	0.153989	0.440799	0.323958	-0.0640851	0.184982	0.146306
183	0.949821	3.04685	0	0	0	0	0	0	0.0623347	-0.157563	-0.646286	0.952476	0.24469	0.917414	-0.642158	-0.285587	-0.071414	-0.0595368	-0.662101	-1.56741	0.775069	-0.509876	0.610553	0.0111142	0.132232	-0.797453	-0.086155	-0.262068	-0.353099	0.661212	-0.56588	-0.256231	-0.871387	0.074596	-0.00245068	-0.241312	-0.0454432	0.141374	0.190467	0.0517563	-0.0113036	0.175118	-0.1028	0.171823	-0.106444	0.404388	-0.158881	-0.086001	0.0420969
184	0.975809	4.39583	0	0	0	0	0	0	-0.0587834	-0.994827	0.306968	1.15589	0.623803	-0.0082034	0.879732	-0.378604	-0.761781	1.30891	-0.446112	0.0355682	0.0567005	-0.277772	-0.276376	-0.217221	-0.0478634	0.241571	-0.782601	0.335459	-0.622973	0.26615	-0.28792	-0.190528	0.484265	0.438019	0.306392	-0.265079	0.282423	-0.0934748	-0.304764	0.416461	0.00819127	-0.23626	0.320736	-0.310631	-0.175732	0.0152541	-0.321349	0.157292	0.231116
185	0.93874	2.89798	0	0	0	0	0	0	0.158136	-3.23883	-1.09112	1.39842	0.731767	1.31099	-1.06394	-0.115653	0.342508	0.0805507	1.33722	0.746485	0.28039	0.228265	-0.74769	-0.0817703	0.209539	-0.333851	-1.00616	-0.156026	-0.198164	-0.0998968	0.129815	-0.420199	0.484019	-0.115247	0.519175	-0.00937025	0.296773	0.609839	-0.269975	0.199444	-0.457402	0.379698	0.143689	-0.0798261	0.111665	-0.0709659	0.293934	-0.206687	-0.250072
186	0.994654	4.02938	0	0	0	0	0	0	0.0272872	0.777195	-0.441481	1.03386	0.301554	0.406701	0.229067	0.344454	-0.553839	0.124514	0.563342	0.644708	-0.154453	1.00591	-0.771205	-0.213942	0.0790183	-0.287087	0.347415	-0.529146	-0.0298384	0.109047	-0.174211	-0.608316	-0.09947	0.193172	0.481844	0.298365	-0.29741	0.253868	-0.036433	0.256166	-0.262323	0.374624	0.0882767	-0.0646281	-0.125159	-0.0171957	0.403126	0.314088	0.106421
187	0.93464	3.20874	0	0	0	0	0	0	-0.0473149	1.05795	1.16416	-0.0976278	2.15382	0.0805638	-0.880334	0.69275	0.212702	-0.413944	-1.07232	0.631941	-0.306463	-0.759456	-0.897188	-0.543862	-0.308018	0.287197	0.557806	1.00645	0.0915964	0.107578	-0.171771	0.729123	0.150761	-0.444995	0.0616955	0.0876582	-0.0743426	0.00151755	0.188143	0.159315	0.303826	-0.413605	0.297517	-0.105455	0.0737557	-0.0721319	0.0721229	-0.131016	0.0553405
188	0.990082	3.04044	0	0	0	0	0	0	0.0365092	-1.90454	0.589119	-1.00862	0.168156	0.700028	-0.0221147	-0.0930171	-0.449786	-0.543675	0.221671	-0.430107	0.396119	0.644845	0.811657	0.552184	0.600753	-0.0806581	-0.0506102	0.0231679	-0.0762655	0.256438	-0.163496	0.355419	-0.245931	0.550071	0.169255	-0.182302	0.483956	0.0224035	0.127888	-0.0702378	0.0151846	-0.455179	0.128768	-0.34054	-0.0528243	-0.506403	-0.136913	-0.374123	-0.132346
189	0.986506	3.08555	0	0	0	0	0	0	-0.035369	2.20011	-0.234872	0.602776	-2.62185	-0.735376	0.1832	0.78509	-0.238722	0.844468	-1.05984	0.0846854	0.492803	-1.01808	0.263931	0.345512	1.23174	0.371278	0.554206	0.721249	-0.218285	0.459081	-0.5637	-0.102595	-0.156689	-0.214277	0.0363408	0.267373	-0.300114	-0.657374	0.265644	0.205714	-0.0253646	0.423502	0.000155626	-0.124526	0.0617319	-0.165614	-0.118575	0.192643	0.0767631
190	0.963284	-2.76864	0	0	0	0	0	0	-0.0221454	3.04039	-3.73937	1.05479	-0.529717	1.21723	0.126407	-0.520393	1.68155	-0.464617	-0.470842	0.733047	0.137221	-0.78869	-0.146458	-0.00153969	0.627597	-0.0336023	0.514362	0.254868	-0.188734	0.112476	-0.0231506	0.024112	-0.541806	0.283577	0.238444	-0.0709159	-0.0560851	-0.0699721	-0.0153203	-0.190005	-0.366863	0.162583	-0.349058	-0.149496	0.531306	0.331675	-0.309723	-0.221673	0.146553
191	0.940014	3.40542	0	0	0	0	0	0	-0.036949	2.60387	0.618594	-2.30444	0.494004	0.650126	1.08147	-0.364656	-0.944527	0.121424	-0.702953	0.662478	-0.252622	0.183665	-0.103305	-0.505051	0.370748	0.115985	0.407277	0.306969	0.396989	-0.543315	0.332249	0.0828186	0.00477866	0.122282	0.0597091	-0.13655	0.0440224	-0.071312	0.473875	0.120967	0.0884891	-0.411119	-0.00254469	0.0804412	0.219445	-0.271035	-0.272714	-0.201443	0.362571
192	0.81461	-2.62378	0	0	0	0	0	0	0.0509978	-0.231662	-0.0674732	-0.507254	0.797505	0.278227	0.454174	-0.165109	-0.461506	0.962715	-0.0646865	0.995189	0.475945	0.175752	-0.564777	-0.239951	0.166499	-0.0166484	0.132598	0.839583	0.476068	-0.269128	-0.200465	-0.150303	0.0304271	-0.231695	-0.250673	-0.00929746	0.224352	0.144954	0.0228771	0.376423	0.105483	0.133839	-0.111261	0.358381	0.0265387	-0.0535771	0.0449953	0.0432367	0.12301
193	0.946644	-2.7863	0	0	0	0	0	0	0.136013	-1.01417	0.494572	1.50437	-1.77217	0.943317	0.244361	-0.171652	0.37536	-0.141762	0.583415	0.954961	-0.436203	-0.0247696	-0.110249	1.12801	-0.905879	-0.0576109	0.59461	-0.486793	0.0553363	0.00229471	0.0826253	0.372826	0.242989	0.437234	-0.102137	-0.0249611	0.334083	-0.363712	0.289752	-0.199563	0.380726	0.0134129	0.0125171	0.219062	-0.32663	-0.0794777	-0.188125	-0.327425	-0.0273709
194	0.949091	-2.99027	0	0	0	0	0	0	-0.0410921	-2.33242	-1.18463	-2.51928	2.07938	-0.250908	-0.0444798	0.115751	0.000552927	-0.121433	-0.609558	-0.149042	-0.664476	0.00189364	-0.0292816	-0.708772	-0.240734	-0.625752	0.524256	0.148163	-0.143014	-0.341136	-0.0861864	0.245603	0.114298	-0.0671329	0.30703	0.102366	-0.0413108	0.221962	-0.426333	-0.185128	0.207109	-0.482633	0.0604314	-0.487006	-0.319249	0.182195	0.124089	-0.0049538	-0.115029
195	0.884659	2.9444	0	0	0	0	0	0	0.0333693	1.88734	0.217112	-0.445504	-0.17223	-0.844484	0.363234	-1.24461	1.48402	1.28238	-0.094986	0.398338	-0.454169	-0.0157145	-0.23089	0.716162	-0.226147	-0.473066	-0.157785	0.254268	0.283181	-0.847061	0.889607	0.348807	-0.0726344	-0.541952	0.204633	-0.342488	0.0748849	-0.231398	0.294226	-0.20061	0.245665	0.285186	-0.192742	0.103928	0.133788	0.26123	-0.0217257	0.116714	-0.0409353
196	0.958551	2.71955	0	0	0	0	0	0	0.0508978	-4.26235	-0.695842	1.73054	0.655089	-0.629576	-1.13547	-0.122043	0.633602	0.166057	0.0148077	0.541562	-1.28557	0.972071	0.200128	0.335165	0.433218	0.374246	-0.188402	0.204607	-0.111004	-0.685476	0.135625	0.338649	-0.148169	0.175482	-0.0729837	0.0124845	0.217179	0.151674	-0.523487	-0.438948	-0.461773	-0.2592	0.207673	-0.0322834	-0.24373	-0.499872	-0.488868	0.0696982	0.0914582
197	0.983644	2.82593	0	0	0	0	0	0	0.0364102	1.51594	-1.337	-0.488852	1.767	-1.58582	0.559468	-0.742016	1.25923	-0.87886	0.565473	-0.0345913	-0.167365	-0.561118	0.142589	-0.589989	0.83608	-0.56889	0.104246	0.684797	-0.355611	0.3248	0.132798	0.224616	0.472787	0.244531	0.0635688	0.383314	-0.00273009	0.131822	-0.111528	0.133897	0.123001	-0.00584983	-0.727647	0.159018	0.237913	0.323154	-0.377178	-0.1586	0.401551
198	0.925908	2.85123	0	0	0	0	0	0	-0.224446	1.74231	-1.64222	-2.58101	1.4166	-0.96346	0.0487248	0.578566	-0.526658	-1.1216	0.681784	0.65588	-1.7609	-0.0244181	-0.531593	-0.242878	0.149896	-0.275845	-0.207884	-0.821162	-0.138763	-0.434913	-0.0825043	-0.21835	-0.259114	-0.0752686	0.507034	-0.244152	0.313907	-0.0270954	-0.553284	-0.518187	-0.0885838	-0.307142	-0.433598	-0.309866	0.0355942	0.0619182	-0.290005	-0.452457	0.0818697
199	0.923064	2.59758	0	0	0	0	0	0	-0.0336394	2.08315	1.1013	0.889559	-0.0420589	0.41009	-0.0838663	0.148269	0.814953	0.589671	-0.502674	-0.907281	-0.306528	-0.819278	-0.692042	-0.0308529	0.273511	-0.636897	-0.287988	0.0305778	-0.0330168	0.343002	-0.190066	0.226257	0.468861	0.02133	-0.0783162	-0.206454	-0.464598	-0.0697861	-0.160511	0.137694	0.0615453	-0.408537	-0.546863	-0.000999842	0.882282	0.329922	0.26454	-0.424399	0.046714
200	0.96262	2.91356	0	0	0	0	0	0	0.00220748	0.817385	-3.17082	-0.165071	-0.646436	0.0069184	0.174891	0.7749	-0.305421	-0.124933	-0.953774	-0.806422	-0.465471	-0.0548588	0.0271634	0.889721	0.412106	-0.154045	0.140798	0.510967	-0.515597	0.138363	0.380382	-0.313428	0.392723	-0.408788	0.138275	0.393637	0.382581	-0.0529378	0.260848	-0.116658	-0.464482	0.0463388	-0.470824	-0.202497	0.262931	-0.110477	0.333375	0.0421046	0.0294064
201	0.912681	3.17251	0	0	0	0	0	0	-0.0132622	1.70682	0.0180155	-0.600173	0.290086	0.0468608	-0.31403	-1.24913	-0.0300091	-0.474317	-0.679878	0.409993	0.475738	0.190171	-0.0204589	-1.22973	0.222762	-0.185071	0.936094	-0.398174	0.829951	-0.817148	0.247141	-0.296679	-0.265026	-0.0654198	-0.121556	-0.112484	0.0625872	0.0908668	0.103408	-0.220362	-0.47023	0.326883	0.41556	0.272076	0.0747013	-0.428468	0.124623	-0.147557	-0.239949
202	0.915273	2.84991	0	0	0	0	0	0	-0.206169	1.43593	-1.95602	-3.16195	0.777024	0.588176	-0.228692	1.35274	-0.756734	1.33921	0.724083	-0.576767	-0.301589	-0.0267727	0.660504	-0.229147	0.592032	0.153448	0.889035	-0.698984	-0.242593	0.0356746	0.113644	-0.349532	-0.0504022	-0.201433	0.414594	-0.274654	0.125644	0.268772	0.438782	-0.299573	-0.416226	0.582774	0.150585	-0.735257	-0.0411029	0.124051	0.292225	-0.250033	-0.0216008
203	0.922671	3.02886	0	0	0	0	0	0	0.0534882	-0.380902	-0.341724	-0.427407	-1.33977	-0.360219	0.220466	1.52305	0.390115	0.547061	0.141394	-0.317032	0.97271	0.334803	0.125536	-0.124873	0.130674	0.49534	-0.222445	0.496988	0.295258	-0.14663	-0.253803	0.345289	0.400009	0.168288	-0.199832	-0.0768984	0.402041	-0.523701	0.0724489	-0.216168	0.0593456	0.0178591	0.463697	0.325844	-0.280589	-0.283418	0.0627634	-0.168476	-0.278666
204	0.888709	2.73796	0	0	0	0	0	0	0.016494	-2.59117	-1.72096	0.608828	-1.19052	0.0101226	-0.361075	0.754526	1.16824	0.120074	0.12617	1.16221	-1.07099	0.676875	-0.275089	-0.438355	-0.375059	0.00648237	0.106389	-0.33336	0.0819441	-0.0516679	-0.211265	0.188965	-0.0779567	0.291147	-0.264752	-0.213646	0.534515	0.318314	-0.590737	-0.156096	-0.273149	-0.10621	0.155341	0.382518	-0.224476	0.0908713	0.0568256	-0.131474	-0.0954712
205	0.911787	2.64481	0	0	0	0	0	0	0.199751	-0.877528	0.70934	1.46139	-0.157537	0.266831	-0.0698843	1.45984	-0.379575	-1.04538	0.669406	0.659377	-0.121445	0.051857	-0.563962	0.804131	-0.476426	-0.243604	-0.18027	-0.225588	-0.136531	0.152585	-0.167608	0.0183789	-0.162351	-0.0669261	-0.472967	0.366702	-0.170916	0.0491979	-0.119512	0.25658	0.146622	0.24237	0.285696	0.119194	-0.202582	-0.361238	-0.0334263	0.148639	-0.103481
206	0.937831	2.99096	0	0	0	0	0	0	0.00883826	-0.13435	-1.60731	1.31595	0.186815	0.528319	-0.00315836	0.873241	-1.80888	-0.790388	-0.834499	-0.453241	0.122673	0.327229	0.107723	0.250207	-0.767824	0.206312	0.656037	0.0707631	-0.422589	0.191561	-0.0349326	0.129114	0.528455	0.0496202	0.0214069	0.301158	0.229535	-0.186823	0.136744	0.133479	0.214247	-0.254517	0.234773	-0.0348443	-0.207744	-0.075028	0.22808	-0.31627	0.121496
207	0.859646	-2.34886	0	0	0	0	0	0	-0.00965183	-0.548012	-1.00306	-1.2828	0.305775	-0.745157	-1.55281	-0.809883	0.980316	0.0964489	0.471734	-1.13363	-0.588951	0.0604506	-0.738617	0.629272	0.510229	-0.700518	-0.0612427	-0.339384	-0.121971	0.0928223	-0.144725	-0.0299386	-0.296311	0.00681736	-0.415024	-0.37749	0.275602	0.225508	0.100125	0.0412249	-0.170686	0.407258	-0.862694	0.175268	0.0278965	0.242019	0.21781	-0.19671	-0.036374
208	0.988311	2.98297	0	0	0	0	0	0	0.142806	0.137087	2.49078	1.57696	-0.46432	1.06899	-0.000233993	-0.0611087	-0.329266	1.99191	1.08926	-0.105809	0.817857	-0.306006	0.553701	-0.210271	0.847666	-0.4234	-0.0954129	-0.258702	-0.272311	0.734761	-0.633325	-0.179525	0.0830515	0.370861	0.0825788	-0.598684	-0.456604	-0.0857291	0.483369	0.44569	0.437723	0.439047	0.12375	0.18074	0.0554762	-0.0342248	-0.19053	0.304548	0.276502
209	0.988603	3.58854	0	0	0	0	0	0	-0.0408492	0.682596	1.42609	1.84814	-0.293471	-0.631694	-2.49008	-0.3268	0.141636	0.0116434	-0.794795	0.284156	-0.0468082	-0.326689	-0.910187	-0.142355	-0.378249	0.158489	-0.562497	-0.162615	0.00336869	0.00791235	-0.288437	-0.00998162	0.635934	0.231241	-0.0247905	-0.0639427	-0.0559783	-0.0285024	0.272036	-0.0163874	0.527201	-0.177728	-0.00618136	0.247293	-0.450153	-0.218194	0.475731	-0.452608	0.0071649
210	0.893873	2.44917	0	0	0	0	0	0	0.167078	0.378296	-0.19796	0.870727	-2.28945	-1.14379	0.407261	-0.588691	1.09694	-0.26733	0.345019	0.0143407	0.486288	-0.776433	0.684709	-0.0109105	-0.149191	-0.311636	0.159049	-0.129988	-0.157149	0.00878277	-0.181015	-0.0297789	0.0998744	0.124842	-0.120197	0.0240058	0.703312	-0.126914	-0.00381302	0.213958	-0.292159	0.306491	-0.207179	-0.00395246	0.142451	0.391169	0.259323	0.132602	-0.305958
211	0.891204	2.6007	0	0	0	0	0	0	-0.0302607	0.614099	-0.596748	1.915	-1.04707	-0.771044	0.32046	1.1586	-0.358795	0.878298	0.194331	0.575276	-0.00253333	-0.701442	-0.376561	0.157746	2.64448e-06	0.466173	0.03782	0.447609	0.158412	0.0244146	-0.261453	-0.106686	-0.0406987	-0.696011	-0.602842	0.0310939	0.480744	-0.240903	0.289902	0.0805296	0.229623	0.072441	0.263271	-0.101989	-0.0607417	-0.225592	0.191973	-0.170786	0.0677216
212	0.977658	3.29917	0	0	0	0	0	0	-0.0801451	2.22967	-0.761382	0.479852	0.596433	0.0474689	0.327511	0.27716	0.537602	-0.110563	-0.338086	0.866139	-0.60044	-0.306223	-0.35775	0.444374	0.472286	-0.322037	-0.00466763	-0.550272	-0.610002	1.01082	-0.65379	-0.371472	0.0675111	-0.352924	0.0280255	0.21603	-0.103203	-0.0809533	-0.0313413	0.555505	-0.0268823	0.061695	-0.0241776	-0.384752	0.275374	0.198268	0.355274	0.159969	-0.154652
213	0.901353	-2.54296	0	0	0	0	0	0	-0.179686	0.963979	4.26832	-0.496951	0.491372	-0.317687	0.300624	-0.600659	-0.58357	0.550868	0.189651	-0.237609	0.635656	0.290941	-0.561455	0.33109	0.959872	0.879152	-0.0580388	-0.292744	-0.340356	0.372117	-0.447629	-0.306108	-0.294351	-0.160163	-0.0581415	0.0301717	-0.997207	-0.345722	0.557999	-0.252747	0.441523	0.139413	-0.296646	0.0229458	-0.0183942	-0.025067	-0.166859	0.275706	0.113104
214	0.950665	3.31601	0	0	0	0	0	0	-0.0714321	-0.221359	1.07321	0.532374	0.871289	-0.535891	-0.481813	-0.777913	-0.507649	1.98062	-0.352691	-0.0766247	0.0524648	0.195138	0.281309	0.0843239	0.618694	-0.060948	0.383136	-0.0544493	-0.0872997	0.124792	-0.154461	-0.648515	0.0141289	-0.0482855	0.451413	0.520611	-0.0181829	0.223301	0.0726469	0.416366	0.0724397	0.132853	-0.236752	-0.0800191	-0.0363153	0.0330692	-0.117943	0.156366	-0.490207
215	0.953685	2.88836	0	0	0	0	0	0	0.0295155	0.538928	-1.48723	-1.05881	-1.39721	-0.276625	-2.25328	-0.0327431	0.251211	-0.654729	-0.0835398	-2.10213	0.0700847	-0.265142	0.229516	0.66538	-0.243903	-0.227321	-0.182211	0.110644	0.424895	-0.163482	-0.442359	0.100942	0.249916	-0.139791	-0.164718	0.0645195	0.233017	0.137042	-0.522435	-0.15175	-0.102476	-0.073836	-0.31416	-0.16833	-0.137084	-0.0948146	-0.0516671	0.00262346	0.130197
216	0.947185	2.76492	0	0	0	0	0	0	0.0817266	0.00576677	2.81051	0.793821	-0.635616	-0.390575	-0.466438	0.863465	0.012282	0.485084	-1.40625	-0.36321	-1.24573	-0.103321	1.44983	0.193409	-0.248215	0.0775398	-0.161648	-0.259626	-0.0217645	0.339369	0.13741	0.3985	-0.124189	0.132064	-0.361364	-0.199621	-0.446921	-0.111272	0.0148661	-0.222681	0.506474	-0.0909081	0.0461994	0.263745	-0.0908471	0.0750048	-0.454748	0.0901482	-0.00517602
217	0.934973	2.97702	0	0	0	0	0	0	-0.0222554	1.61034	-0.64828	-0.293788	-1.73295	0.547618	1.15038	-1.18634	-1.15054	0.468454	0.252755	0.615859	0.419579	0.234792	-0.428435	-0.276415	0.418992	0.190972	0.352865	0.120171	-0.142396	0.00649896	-0.233159	0.156862	-0.010145	-0.403133	-0.276342	0.227628	0.015409	-0.5124	0.25852	0.205206	-0.221337	0.183018	-0.00357674	-0.0636328	0.240328	0.149321	-0.112618	0.177223	-0.335975
218	0.938521	2.82185	0	0	0	0	0	0	0.0729699	2.00361	0.012066	1.91054	-2.00643	0.583018	2.29233	-0.0288426	-0.292661	-0.671818	-0.136343	0.0474633	1.01612	-0.597208	-0.0810857	0.0761526	-0.0853029	-0.197563	-0.587947	-0.044721	-0.14312	0.273492	0.255693	0.209891	0.184544	-0.099217	-0.315002	0.287335	-0.00586152	-0.254019	0.173094	0.128107	0.0373902	-0.000748646	0.0489872	0.0582725	0.772862	0.398854	0.337565	-0.173367	0.0141881
219	0.931407	-2.82987	0	0	0	0	0	0	0.00693066	2.7075	0.265419	0.106676	-1.26858	0.271704	0.0363465	-0.00867203	1.0676	-0.231221	-0.293533	-0.219049	-0.236615	-0.311296	0.438134	-0.265794	0.285778	0.0906165	0.370017	-0.240324	0.0221403	-0.111236	-0.221861	0.105463	-0.355257	-0.038629	0.244911	0.0433487	-0.0767335	-0.0421637	0.360668	0.0293841	0.562752	0.514666	-0.131553	0.431616	0.412007	0.254611	-0.453223	0.104216	0.141439
220	0.969843	3.05286	0	0	0	0	0	0	-0.0855548	0.401524	-3.94032	0.866407	1.40781	-1.05185	0.325119	-0.454749	-0.662652	0.801824	-0.502344	-0.353389	0.324969	0.18887	-0.790607	0.02554	0.411697	0.587257	-0.104143	-0.235842	-0.287953	-0.142155	0.137506	0.336508	-0.118593	-0.180873	-0.28452	0.804727	-0.0781767	0.693292	-0.110817	0.557463	-0.114376	-0.153551	-0.000196159	0.0320402	0.319104	0.241088	0.0234345	-0.0933108	0.172255
221	0.905086	-2.86661	0	0	0	0	0	0	0.00953552	-3.20208	-0.862011	-0.897291	-0.465642	-0.431582	-0.148968	-0.182027	0.085639	-0.485472	-0.351908	-0.0807289	-0.660089	-0.369541	0.806769	-0.565774	0.437646	0.624017	0.157606	-0.45941	-0.0864592	-0.378955	-0.0809353	-0.0978027	0.0687186	-0.147181	-0.304397	0.572363	-0.0118486	0.43659	0.287664	-0.230838	-0.453735	-0.151045	0.0576756	0.0593844	-0.430655	-0.284541	-0.0869639	0.00881409	-0.112153
222	0.967376	3.04134	0	0	0	0	0	0	-0.0662969	2.52123	-0.0823063	-1.56528	0.486675	-1.12704	0.035561	0.984862	0.134139	-1.76995	0.488703	-1.04568	-0.19215	-0.747143	0.604117	0.0103942	-0.336002	-0.0933229	0.472703	-0.186041	-0.0168385	0.238769	-0.417795	0.171037	0.261392	-0.123271	-0.191528	0.316123	-0.0639621	-0.154715	0.261012	-0.0925835	0.370935	-0.239855	-0.164349	-0.0976931	0.464253	0.306567	-0.378278	-0.285088	0.0318975
223	0.904707	2.81841	0	0	0	0	0	0	-0.00980568	3.65363	0.488816	0.331143	-0.0789597	0.463877	-0.0411682	0.897002	0.349237	0.192266	-0.800053	0.0761267	-0.1121	-0.55564	0.690649	-0.191617	0.123651	-0.293966	-0.184138	0.143108	-0.422054	0.567723	-0.247635	-0.374389	0.023901	0.275229	0.107318	0.415262	-0.216686	0.0282021	-0.15381	-0.0662628	0.115931	-0.0262422	-0.151949	0.0325061	0.191883	-0.0535534	0.0706932	-0.124394	-0.188903
224	0.992583	3.22777	0	0	0	0	0	0	-0.023827	-0.0318746	2.03793	-0.322339	0.727908	-1.45212	0.41644	0.741168	-0.371185	1.27377	1.22506	0.292352	0.0161321	-0.391991	-0.120935	0.698561	-0.642838	0.288485	-0.568814	-0.25753	0.226099	0.481657	0.514398	-0.706774	-0.200737	-0.209377	0.276936	0.249183	-0.299224	0.610062	0.00201084	0.0105996	0.207622	-0.0804476	0.0839565	-0.239153	-0.439233	-0.0410624	-0.170249	-0.432264	0.0492504
225	0.976392	2.65902	0	0	0	0	0	0	-0.0550195	0.720341	-1.34776	2.31591	0.0936656	-0.304211	1.35095	0.158764	0.462284	-0.129859	0.640015	0.955673	-0.642221	0.468258	-1.06467	-0.672267	-0.166157	0.545107	-0.679828	-0.36954	0.091567	0.047994	0.1799	0.0033191	0.125849	0.536731	-0.182135	0.424026	-0.140018	0.291262	-0.0080004	-0.117983	-0.063635	0.0731074	0.297986	0.130424	0.401282	0.127429	0.0282802	0.013745	-0.214204
226	0.992148	3.41417	0	0	0	0	0	0	-0.0491269	-0.633997	0.150635	-0.555953	-0.03427	-0.22114	-1.12018	-0.166551	0.28866	0.361762	-1.29138	0.253017	0.468881	-0.0746519	-0.549667	-0.0895057	0.614102	-0.476886	0.288837	-0.0476085	0.431983	-0.289061	0.0957833	-0.197891	-0.0787384	0.246751	-0.0887524	0.116004	0.614657	0.260458	0.318988	0.165109	0.0995105	0.0936205	0.250708	-0.270309	-0.281586	-0.40346	0.276574	-0.0824051	-0.312045
227	0.980981	-3.8354	0	0	0	0	0	0	-0.0219695	-1.61348	1.0662	-2.07263	-0.485249	0.320013	-1.37887	-0.248088	-0.509114	-1.46237	0.788408	0.59923	-0.290084	0.245495	-0.708878	-0.65138	-0.156468	-0.693899	0.105679	-0.830458	0.0848595	0.269282	-0.17996	-0.126905	-0.468826	-0.510814	0.126216	0.509747	0.168285	0.157685	0.220238	-0.419078	-0.0501808	0.0752619	-0.188656	-0.191778	-0.518967	-0.372742	-0.24242	-0.0847117	-0.38052
228	0.914489	2.80638	0	0	0	0	0	0	0.00710652	0.156905	-0.113392	1.39881	1.226	0.82792	-0.921312	-0.168006	-0.329734	-0.201368	0.307671	0.255589	0.0499498	0.774119	0.391602	0.0228125	0.435396	0.886389	0.682072	0.26994	0.828746	-0.862566	1.27272	0.381111	0.124061	-0.313296	0.194522	0.0609558	0.239456	0.237361	-0.257318	0.176287	0.314759	0.00496655	0.353509	-0.217447	-0.301384	-0.265008	0.313462	-0.16532	0.230213
229	0.917725	-2.71947	0	0	0	0	0	0	-0.0416053	-0.598271	0.735279	-1.02873	0.0335949	0.509616	-0.494505	-0.0258187	-0.297504	-1.28493	-0.213596	-0.639937	-0.135484	-0.601411	-0.462379	-0.0180081	0.0856045	-0.32108	0.201658	-0.0097487	-0.0917102	-0.114302	-0.0425909	0.339555	0.00151458	-0.0223079	-0.272284	-0.377825	0.159763	-0.19895	-0.481407	0.0830607	0.274081	0.085271	0.0573517	-0.0300102	-0.405842	-0.626303	0.188836	-0.265985	0.143529
230	0.975514	2.836	0	0	0	0	0	0	-0.0193948	0.115148	-1.32611	-1.99536	0.13057	0.00335764	-0.126812	0.265225	1.06094	0.679905	-0.793918	-0.326352	-0.1571	0.588222	-0.0784311	-0.282548	0.0835059	0.0107755	0.257737	-0.388647	0.536832	-0.240484	0.359054	0.167411	0.555984	0.132629	0.202167	0.469595	-0.0897606	0.442945	-0.687116	-0.0285409	-0.101671	0.372757	-0.0274981	0.0961074	-0.0920382	0.101956	0.318591	0.156517	-0.751214
231	0.9654	3.36348	0	0	0	0	0	0	0.0471546	-0.786362	1.78588	-0.791874	-0.433179	-0.652844	-1.80524	-0.0769166	-0.198696	0.0647056	-0.0597078	-0.920723	0.57855	0.309663	-0.387562	-0.486968	-0.526128	-0.380099	-0.0557657	0.175887	0.668646	0.00869238	0.0985242	0.0967124	0.0973902	0.437445	-0.554841	0.241154	0.519489	-0.0938159	0.122115	0.0798689	0.133259	-0.074495	0.240432	-0.00677633	-0.394126	-0.318015	0.0800176	-0.409952	-0.255623
232	0.971859	2.69757	0	0	0	0	0	0	-0.00406047	-2.5411	-0.328889	-0.411431	0.179332	0.289078	-1.84557	-1.11437	0.0863498	-0.622481	0.0763283	0.182848	0.221924	0.875421	0.413523	0.729203	0.465764	0.0291746	-0.288659	-1.10256	0.209618	-0.367496	0.149293	-0.090998	-0.306873	-0.140366	-0.321131	0.133315	0.403412	0.266647	-0.232611	0.0131068	-0.184167	0.354955	0.0855908	-0.161159	-0.315492	-0.370261	0.187817	-0.0449905	-0.0921912
233	0.904587	2.80458	0	0	0	0	0	0	0.0116335	-0.146721	-2.7799	-0.745957	-1.08345	-0.0102206	0.425663	0.211594	1.09066	-0.602801	0.382704	0.265414	0.643075	-0.851828	-0.757802	-0.670015	-0.179589	-0.357761	0.745859	-0.0953612	-0.653637	0.380763	-0.706099	-0.0955264	0.0769292	0.260343	-0.243135	0.330761	0.29998	0.218419	-0.075791	-0.227665	-0.306943	0.129166	-0.21273	-0.231192	0.0169466	0.298529	0.129695	-0.00268117	0.136538
234	0.902212	2.98717	0	0	0	0	0	0	-0.0823737	0.288533	-0.548975	0.218094	-1.79667	-1.27283	-0.349135	-1.13947	0.183946	-0.100488	-0.223806	0.392867	-0.094345	-0.559261	-0.34056	-0.358089	0.46735	0.230764	0.384294	-0.197543	0.42799	0.11109	0.248016	0.376485	-0.50713	-0.16152	0.315181	0.26933	0.060301	0.0688749	-0.0507694	0.697493	-0.359572	0.179629	-0.187038	0.178709	-0.0425656	0.237425	0.135022	0.26017	-0.148468
235	0.940568	2.94196	0	0	0	0	0	0	0.211247	-0.635328	-2.11423	2.884	0.271271	2.10022	1.3311	0.0385198	0.94201	-0.860038	-0.857067	-0.212152	0.65116	-0.321272	0.773713	0.0799897	-1.20818	-0.276106	-0.358214	0.441619	0.291016	-0.340849	0.652205	0.323525	0.344951	-0.362171	-0.151672	0.272824	0.409291	-0.259335	-0.0266387	0.0459474	-0.225436	-0.108934	0.00757423	0.267682	0.356711	0.577089	-0.0657672	0.167983	-0.195306
236	0.943508	3.09556	0	0	0	0	0	0	-0.015781	-0.443904	-1.80338	0.182497	0.568999	0.191532	-0.770654	0.208429	-0.618366	-0.262853	-0.0808218	-0.44481	-0.686535	-0.662028	0.399297	0.902811	0.348187	-0.649132	0.569421	0.490813	-0.923873	0.446679	-0.81418	-0.291188	-0.223454	0.14688	0.339345	0.0484178	0.197655	0.210615	-0.299314	-0.199228	-0.143764	-0.200738	-0.255159	-0.335413	0.290372	0.403727	-0.104365	0.33106	-0.127697
237	0.910479	-2.56074	0	0	0	0	0	0	0.036362	-4.11745	-1.06981	0.102397	0.529829	0.329909	-0.0764147	0.0298597	-0.915933	-0.450994	1.2371	0.157902	-0.674919	0.611266	0.266258	1.28033	0.217882	0.0883467	0.420912	0.127038	0.257912	-0.782766	0.0152456	-0.0566854	-0.280347	0.481885	0.105354	0.205893	0.115635	0.078127	-0.16094	-0.110787	-0.0234911	0.0348621	0.180285	-0.556285	0.0421481	-0.27989	-0.0131137	0.219613	-0.145785
238	0.973743	3.03048	0	0	0	0	0	0	0.0437488	2.31101	-1.84227	-1.19404	-0.182718	0.410552	-1.71354	-0.822367	0.279063	0.118506	0.293341	-1.32205	0.672551	0.314039	-0.669335	-0.302012	0.337595	-0.516256	0.878084	0.34948	0.270403	0.0798378	0.00472056	-0.284988	-0.439658	0.211698	-0.00505387	-0.280477	-0.089699	0.156085	-0.472261	0.236737	-0.0663146	0.97261	0.119497	-0.190004	-0.133376	0.0279269	0.1127	0.500183	-0.237737
239	1.00474	4.17606	0	0	0	0	0	0	-0.0623312	-0.161357	1.6925	-0.886927	1.11162	1.41035	-0.85926	-2.18998	-1.17113	-0.694539	0.210936	-0.252458	-0.265158	-0.202659	0.10836	0.118223	0.48354	-0.337032	7.59191e-05	-0.218937	0.640264	-0.817334	0.574052	0.42374	-0.264036	0.253435	0.161232	0.0144843	-0.000850229	0.269835	0.467309	-0.0235938	0.166071	0.466539	0.114623	-0.397151	-0.228811	-0.26556	0.0465307	0.0787581	0.121006
240	0.998238	4.31918	0	0	0	0	0	0	-0.0696368	-1.57188	0.805617	-0.282813	-2.18841	-0.775615	-0.117268	-0.326775	0.139865	-0.336309	0.258141	-0.161404	-0.425933	0.0219348	-0.298271	0.352277	0.108832	0.0149856	0.250727	-0.00946853	-0.33643	0.181037	-0.571588	-0.290333	-0.0329971	0.165154	0.507123	-0.206271	-0.254062	-0.25014	0.230581	-0.31338	-0.229371	-0.00483919	-0.015864	0.401582	-0.440831	0.233681	-0.192963	0.255572	0.0245692
241	0.896074	3.29913	0	0	0	0	0	0	0.126474	1.30458	0.846523	2.95182	-0.478337	-0.205699	0.258117	1.23682	1.19384	0.696334	1.6139	-0.766034	-0.148001	-0.76183	0.143419	1.11701	0.117001	-0.503979	0.342881	-0.216522	-0.129529	0.756674	-0.635947	-0.603592	0.0617374	-0.0917039	0.398032	-0.0978024	-0.172761	0.234431	-0.0371762	-0.11836	-0.0853036	0.0837932	0.341848	-0.0209609	0.59781	0.362873	0.0461042	-0.0119245	-0.0208511
242	0.855253	-2.81132	0	0	0	0	0	0	-0.153573	-0.441054	2.02242	0.1862	0.250932	-0.316726	-0.136497	-1.24625	0.853927	0.592923	-0.49529	0.188596	-0.337965	-0.644973	-0.771425	0.43997	-0.204862	0.999132	-0.326854	0.10734	-0.173923	-0.228555	0.543936	0.236891	0.266306	0.283046	0.458152	-0.04133	0.11174	-0.653301	-0.222647	-0.028437	0.423102	-0.421174	-0.335555	-0.167113	-0.70354	-0.125068	0.0620924	0.160687	-0.00780314
243	0.828988	2.81433	0	0	0	0	0	0	0.0930947	-1.61702	-2.41214	1.84985	1.14613	-0.329978	0.650027	1.77129	-0.859371	0.186754	-0.657499	0.292578	0.765538	-0.143781	0.278388	0.828307	-0.415898	0.249193	0.0849996	0.210988	0.0651589	0.0154968	-0.149218	0.0733941	0.0371094	-0.131285	0.0611644	0.303874	-0.0419992	0.820505	-0.138864	-0.271059	-0.747492	-0.0330311	0.647231	-0.102777	0.321843	-0.108766	-0.244127	0.02117	-0.0131346
244	0.888299	2.74606	0	0	0	0	0	0	0.0166184	2.3301	-0.795804	1.0822	1.14716	2.3861	0.669292	-1.2293	-0.043458	-0.0221662	-0.0374506	-0.398957	-1.3647	-1.34899	0.258637	0.4875	0.71849	0.158041	0.307587	0.0351932	-0.393448	0.467613	-0.436321	-0.206313	-0.234078	-0.113091	0.241224	0.118163	0.0993142	0.239095	-0.194281	0.387153	0.341488	-0.0287415	0.132546	-0.157404	0.942405	0.354421	-0.0493951	-0.382513	0.14623
245	0.909509	2.71932	0	0	0	0	0	0	-0.106371	2.68842	1.66377	-2.11499	-0.0791269	-0.890479	0.415634	1.34666	-0.392955	0.367903	-0.0809971	0.683185	-0.712284	-0.0176354	-0.271731	-0.0663669	-0.586393	0.27278	0.163429	-0.498978	0.202475	-0.0921481	0.583612	-0.286362	-0.450431	0.496545	-0.117717	-0.229958	-0.186553	-0.181147	0.114293	0.0469352	0.307648	0.0865408	-0.0125245	-0.242367	0.0600919	0.322999	-0.087595	-0.0150717	0.107587
246	0.982886	3.63237	0	0	0	0	0	0	-0.00461424	0.500772	-2.33498	-0.412949	-1.19328	2.47665	0.835111	-0.21559	0.380157	1.07263	0.662786	1.16551	0.298249	0.612643	0.397075	-0.717499	1.10761	-0.343166	0.0657486	0.118169	-0.305141	0.393935	-0.00335334	-0.506475	-0.0744383	-0.104468	0.095054	-0.203091	0.265191	-0.394228	-0.197964	0.0956818	-0.394219	-0.350467	0.525901	-0.0834261	0.742064	0.0205982	-0.047032	-0.122207	0.312335
247	0.913011	2.67646	0	0	0	0	0	0	-0.00738603	1.24966	0.00719699	1.72229	-0.114207	0.383691	-0.0341856	-1.67869	-1.75101	-0.515608	-0.923215	-0.381325	0.0714097	-0.53452	-0.384544	-0.233323	-0.418928	-0.0673561	-0.0754853	-0.00911054	-0.361326	-0.0316316	-0.087806	-0.254674	0.374533	0.0268814	-0.263754	0.012497	-0.468502	-0.073879	0.291103	0.357448	0.485441	0.0899394	0.147897	-0.164777	0.0826058	0.100721	0.393979	-0.0313793	-0.014188
248	0.94698	2.78125	0	0	0	0	0	0	-0.0589837	1.3953	-0.222527	-2.35813	-0.0837081	1.44807	-0.546608	0.800635	0.413037	0.275168	0.384732	-0.232261	0.122208	-0.571009	-0.366984	-0.164443	-0.921562	0.413403	-0.0357479	-0.7744	0.483444	0.154899	-0.0488056	0.0437407	0.0432179	0.228506	0.176473	-0.183229	0.346437	-0.223576	-0.106595	-0.247519	0.267527	0.309536	-0.251229	-0.0541676	-0.228333	0.215392	-0.594186	-0.0874324	-0.0489301
249	0.968978	3.02006	0	0	0	0	0	0	0.117655	-3.54055	-2.64465	1.22531	1.21273	-1.23486	0.62229	-0.0732807	0.449079	-0.293594	0.205082	-0.0133367	-0.75071	0.593619	-0.78756	0.0474504	-0.0234589	-0.342034	-0.433346	-0.107026	0.148782	-0.597133	0.3562	-0.270559	0.591241	-0.196707	-0.238936	-0.0227015	0.585756	0.580843	-0.00954213	0.287053	-0.389067	0.11447	-0.0677772	0.362203	0.246665	0.390108	0.310073	0.287938	-0.100327
250	0.978014	3.15158	0	0	0	0	0	0	-0.0595233	-0.467817	4.64941	1.60721	-0.0546076	1.01671	-0.047297	0.620054	0.337401	1.40059	1.42313	0.441935	0.142412	0.152415	0.0888477	0.0206004	0.237851	0.581547	-0.618677	0.204177	-0.0411104	-0.14923	-0.360192	0.21448	0.57399	-0.168253	0.262234	-0.229829	-0.80427	-0.355088	-0.0582845	-0.153227	0.473773	0.110147	0.226673	0.0497774	-0.135814	-0.155483	0.260603	0.0134793	-0.205057
251	0.9426	2.89569	0	0	0	0	0	0	-0.11954	-0.335127	-1.22287	-1.44516	-0.336112	1.12367	1.77535	-1.0311	-1.18041	0.274083	0.0308914	-0.939628	0.00719581	0.00979895	-0.433636	-0.00855663	0.757598	0.9403	0.557302	0.101578	-0.162353	-0.19382	0.0551229	0.300679	0.073285	0.349887	-0.276812	-0.139986	0.281928	0.125164	-0.36401	0.409313	-0.486753	0.134313	0.369459	-0.28213	0.317232	-0.227371	-0.131688	0.0221156	-0.0912483
252	0.978633	2.68817	0	0	0	0	0	0	-0.0352256	-0.00326738	-0.938575	0.276263	-1.37481	-0.622498	1.35923	0.298563	-1.542	-0.0354822	0.413987	-0.0878343	-0.444673	0.299202	0.0517383	-0.259639	-0.223489	-0.345526	0.650116	0.658313	-0.0462883	-0.382335	0.551802	0.572466	-0.125615	-0.0771663	-0.292761	0.101075	0.302491	-0.274001	0.219445	-0.00815329	0.107749	0.21757	0.285247	-0.50838	0.248032	0.181703	-0.00683322	-0.326637	0.00660523
253	0.970619	-3.12392	0	0	0	0	0	0	0.112531	-0.451325	-0.0623303	1.52564	-0.730873	0.428458	1.41753	-0.56526	0.100716	0.419455	0.690975	0.616044	0.343808	0.697061	0.918972	0.061533	-0.0236348	0.199884	0.121505	-0.34844	0.0967913	0.116828	0.0206798	0.215478	-0.0760191	-0.207061	-0.104646	-0.404177	0.468974	-0.00929809	0.341306	0.234081	0.0579351	-0.191389	0.20853	-0.213298	0.316948	0.0460642	-0.553278	-0.442364	0.0727523
254	0.921641	2.47204	0	0	0	0	0	0	-0.0323446	0.966856	1.1707	-2.13845	0.555125	-0.656746	0.557848	0.340327	-0.481799	-0.41716	-0.662082	-0.569488	0.761449	-0.0432758	0.0859119	-0.653532	-0.838514	-0.612033	0.163226	-0.283653	0.182501	-0.387926	0.454863	0.105611	0.0416054	0.296504	-0.166376	-0.386643	0.0557117	-0.143909	0.14752	-0.0865702	-0.0321386	-0.0357517	-0.0462304	-0.505474	0.0684719	0.0255177	-0.245281	0.0281523	-0.0714635
255	0.90097	3.0094	0	0	0	0	0	0	-0.0918972	2.41316	3.08447	-0.534234	-1.43454	1.89042	-0.0892078	0.594099	-0.334373	-1.51787	-0.536161	-1.68622	-0.0580961	-0.711447	0.104084	0.49325	-1.17405	0.319543	-0.263111	0.679266	-0.0542199	-0.161027	-0.356098	0.228058	-0.769239	0.316907	0.168217	-0.292566	-0.30363	-0.223714	0.268923	-0.517531	0.522672	0.133364	-0.164688	0.188082	-0.332857	0.110853	-0.434991	0.0476792	-0.00627628
256	0.983718	2.82829	0	0	0	0	0	0	0.0723452	-1.1246	0.373867	-0.15159	-0.202411	-0.293645	-1.44282	-0.711556	-0.0926799	-0.0759864	0.902483	0.0250041	0.813725	0.494643	-0.36796	0.660016	-0.615631	-0.119291	0.265639	1.15262	0.314142	-0.460162	-0.0665424	-0.105386	-0.147344	0.341867	0.155702	-0.0706983	0.302905	-0.0135868	0.11183	-0.161289	0.116498	0.188427	-0.0947814	0.0179724	-0.319757	0.145235	0.100933	0.274525	-0.0425566
257	0.973387	2.66785	0	0	0	0	0	0	-0.0347524	0.858333	0.690597	2.59841	-2.04501	-0.607679	-0.534754	-1.59047	1.12093	-0.459144	-0.416132	0.962835	-0.726188	-0.247862	-0.217697	0.249332	-0.696337	0.996882	-0.785596	0.309495	-0.0618283	0.402412	-0.262125	-0.576397	0.520858	-0.273173	-0.643611	-0.135389	0.000484534	-0.223743	0.349901	-0.0873579	0.122996	-0.0238174	-0.416854	0.419281	-0.30714	0.522052	0.188548	0.000164693	-0.100331
258	0.976767	2.66798	0	0	0	0	0	0	0.0457834	1.72339	1.55874	2.02609	2.05075	1.86114	0.549889	1.19207	-0.548872	1.7181	0.807899	0.809544	0.405693	-0.864373	0.628427	0.220947	0.57406	0.207323	0.0492866	1.00425	0.0589036	-0.320262	0.236582	-0.0491655	-0.38193	0.218118	-0.0554422	-0.133587	-0.754016	-0.236898	-0.333884	0.105022	0.270384	-0.0273402	0.0515552	-0.184432	0.0535578	-0.279019	-0.101083	-0.0823299	0.221216
259	0.924319	3.99202	0	0	0	0	0	0	-0.0210745	-0.605585	0.238658	-0.268805	-0.038348	1.76187	-0.0966491	-0.746488	-0.888322	-0.5315	0.283233	0.148033	0.13303	-0.552313	-0.031256	0.178651	-0.0141526	-0.193628	-0.0853152	-0.906381	0.147111	0.170644	-0.525581	-0.251952	0.266294	-0.239386	0.540439	0.251136	-0.00505821	0.37429	-0.240864	-0.0534639	0.0385959	0.370261	0.17742	0.11276	0.0293658	-0.122383	-0.573563	0.145068	-0.0872724
260	0.959706	3.35501	0	0	0	0	0	0	-0.0931372	-2.02979	-2.3593	-1.67398	-0.859922	0.619956	0.467047	-0.895749	-0.501104	-1.01924	-0.53034	-1.69237	-0.0357315	0.0391564	-0.771488	0.0356537	0.709623	-0.00124312	0.242928	0.247578	0.0024992	-0.275683	0.156883	0.343579	0.149687	-0.249088	-0.107047	0.0481256	-0.173694	0.132671	-0.296648	-0.112543	-0.37536	-0.0261454	-0.112317	0.0818067	-0.178179	-0.352556	-0.0491777	-0.0323997	0.311642
261	0.943737	2.50199	0	0	0	0	0	0	0.0683635	-0.135271	0.579096	-0.806189	-1.72159	0.330539	-0.00458781	-1.50578	0.819916	-0.294909	-0.371765	0.883352	-0.533931	-0.135479	0.764594	0.442628	0.976502	-0.572128	0.116335	-0.160486	0.456268	-0.0502404	-0.186646	0.090587	-0.0977136	-0.111569	-0.211775	-0.347531	-0.0168864	-0.362123	0.203837	-0.114663	0.15307	-0.0574439	-0.365406	-0.0508906	0.0576582	-0.113824	-0.45165	-0.23671	0.0902669
262	0.946976	2.76046	0	0	0	0	0	0	-0.038519	0.92114	-1.73342	-1.38473	1.79002	1.43412	-0.533192	-1.1652	-1.03391	-1.31431	-0.0211978	0.00631007	-0.508243	-0.604352	0.276478	0.00358454	0.0974454	-0.215532	0.254331	0.197216	-0.0136762	0.348441	0.46532	-0.168505	0.111182	0.459732	0.155637	0.52787	0.149221	0.0808373	-0.336001	-0.357159	-0.401528	0.217445	-0.0163929	-0.162716	0.0498665	-0.0378762	-0.342232	0.161507	-0.0118985
263	0.970297	2.8607	0	0	0	0	0	0	-0.000607481	1.88853	0.323216	-0.844616	0.362522	1.89563	0.888659	-0.0711436	1.22121	0.514264	-0.171531	-0.196108	0.258346	0.00606322	-0.178749	-0.647999	-0.777145	-0.119428	-0.188998	-0.260544	-0.209835	-0.147087	0.815727	0.30042	0.214696	-0.0980099	-0.122686	-0.52973	-0.197138	-0.159443	-0.263809	-0.236762	0.252652	0.436925	-0.0295567	-0.417343	-0.032597	0.200928	0.431134	0.00876064	-0.214796
264	0.936188	3.50191	0	0	0	0	0	0	-0.104949	0.893448	-0.709587	-1.28807	0.657339	-0.837033	-0.551636	0.265463	0.250478	0.44219	-0.176946	-0.146328	0.494194	-0.33794	-0.721158	0.22772	1.03366	-0.0705466	0.132062	-0.067121	-0.440003	0.297526	0.0966208	-0.0929588	0.354263	-0.498262	0.339558	0.054019	0.393039	-0.127753	0.348572	0.205115	-0.178864	0.0611765	-0.524843	0.198122	0.0504956	-0.0569254	-0.093824	-0.184702	-0.0517666
265	0.99316	3.07373	0	0	0	0	0	0	-0.0169633	2.36127	-1.81458	-0.404307	-0.819933	-0.294584	0.195432	0.193636	0.888929	0.452066	0.590533	0.531095	0.395953	0.0247658	-1.22033	-1.13391	-0.24706	0.0421367	-0.168594	0.787553	-0.192456	-0.146689	0.00641379	-0.342328	0.447323	0.00334924	0.369881	-0.087268	-0.371505	0.136011	0.167675	-0.200142	-0.21139	-0.0326131	-0.432185	0.295324	0.252574	0.40992	0.5337	-0.134149	-0.101614
266	0.991903	3.50684	0	0	0	0	0	0	-0.091905	2.21497	2.81396	-1.72367	-1.74327	-0.582509	-0.995151	1.01171	0.695958	0.675256	0.170595	1.38558	-0.0493464	0.386341	0.158774	-0.0781291	-0.605583	-0.109454	-0.0592475	-1.05957	0.0301212	0.438776	-0.497747	0.333008	-0.176893	0.0591699	-0.469073	0.0794749	-0.532268	-0.26271	0.675883	-0.156858	-0.0311904	0.0921153	0.207521	0.0902025	0.0975705	0.0849968	-0.176496	0.218194	0.0788165
267	0.888586	-3.01878	0	0	0	0	0	0	0.11893	-0.136101	2.75005	1.70499	0.919597	0.673099	0.613228	-0.376557	0.174642	-0.291119	-0.0183163	0.649613	-0.387835	-0.356007	1.05966	0.124871	-0.456905	0.181315	0.267648	0.347552	0.87375	-0.467336	0.224396	0.0320268	0.336428	0.00857722	0.00349636	0.0557703	-0.647025	0.332999	-0.116731	-0.428824	-0.102669	0.137265	-0.132038	-0.0554926	-0.203782	-0.364984	0.214872	0.233359	0.380073
268	0.93793	3.25082	0	0	0	0	0	0	-0.0344202	-0.00773141	-0.375101	1.8732	-0.234446	-1.27605	0.819919	1.25035	0.652433	-1.55577	-1.38991	0.07556	1.09306	-0.947547	0.389495	0.281448	0.221355	0.448124	0.151572	0.346671	0.0259727	0.252059	0.153524	-0.282693	0.232086	0.102338	0.0423184	0.0931721	0.434918	-0.484171	0.390684	0.554273	0.0377008	-0.372725	-0.182053	0.368169	0.00436212	0.110108	0.106354	-0.134885	0.475602
269	0.917099	3.01355	0	0	0	0	0	0	-0.0876149	2.39015	-1.22455	-0.355398	-2.65888	-0.947905	-0.861267	0.241535	-0.689894	-0.566427	0.286659	-0.979663	-0.0296361	-0.682394	0.0158505	-1.01909	0.183386	-0.331304	-0.357173	-0.134504	-0.254602	0.363914	0.247153	-0.065802	0.0637782	0.189307	0.297796	0.162344	0.0332873	-0.372277	0.210283	0.0206279	-0.377023	-0.252227	-0.355033	-0.409863	-0.0296219	0.200048	-0.034094	-0.309491	0.251333
270	0.927328	2.58264	0	0	0	0	0	0	-0.116491	1.59748	-0.700593	-0.656922	-1.3537	-0.26984	0.0238844	0.181654	-0.131824	0.00821722	-0.625794	-0.115839	0.10803	-0.585905	0.40473	0.263995	-0.0101185	0.347211	0.157622	-0.593427	-0.309464	0.252781	-0.0338665	-0.805006	-0.379877	0.229014	-0.166949	-0.116803	0.0944392	-0.441353	-0.317817	0.185787	0.419042	-0.439703	0.0766354	-0.0639477	0.404763	0.379321	-0.0632791	-0.300188	0.182761
271	0.945519	2.85935	0	0	0	0	0	0	-0.0494533	-0.0376742	1.12668	-0.56647	-1.40869	-1.29494	0.314749	-0.610166	0.130464	0.919969	0.0944264	0.385499	-0.116515	-0.541309	-0.0626446	-0.572913	0.705429	-0.0869521	-0.306407	0.269568	0.417181	-0.12993	0.108193	0.448227	0.200462	0.329451	-0.076539	0.0245387	-0.0238914	0.0692768	0.320378	0.370649	-0.0359541	0.398432	-0.252554	-0.156437	0.0851188	-0.00179816	0.0970482	-0.230516	0.0156019
272	1.02213	2.84369	0	0	0	0	0	0	-0.0682687	4.06164	-0.437253	1.7026	0.10827	0.0260353	0.703124	-0.401398	-0.579472	0.796849	0.271782	0.754035	-0.788592	0.865674	0.114219	0.752159	-0.0272677	1.05681	0.0316206	1.15371	-0.212848	0.0788473	0.449176	-0.314228	-0.303488	0.341269	0.289093	-0.285707	-0.2239	-0.43972	-0.14239	-0.0654326	0.49651	0.415042	-0.222877	0.0699564	0.233637	0.359241	0.0483861	0.250548	0.193277
273	0.951388	2.72432	0	0	0	0	0	0	-0.106729	1.0586	2.48936	-1.48245	-0.399451	0.656168	-1.19932	1.0261	0.192848	-0.41962	-0.899548	-0.0322516	0.108991	0.512344	0.00538937	-0.198653	-0.327859	-0.152905	0.200092	-0.0606933	-0.00447075	0.25141	-0.349668	-0.0816158	0.0377632	-0.222492	-0.120111	-0.374227	-0.00848163	-0.832362	0.102447	-0.378189	0.313561	0.365961	-0.122984	-0.0164253	-0.560923	-0.220505	0.200441	0.322071	-0.246527
274	0.924385	2.69835	0	0	0	0	0	0	-0.000734794	-0.913266	1.69399	1.44727	0.542561	0.126166	0.50689	-0.0570863	0.481124	1.40388	-0.526522	0.535569	0.123907	-0.338123	0.975381	0.129699	-0.08831	0.146264	-0.0781125	-0.304501	-0.353321	0.702797	-0.0362414	-0.493294	0.0499089	-0.0372406	-0.26729	-0.221823	0.0921301	-0.0550381	0.314127	0.394289	-0.139679	-0.331793	0.168585	0.150866	0.00500566	0.113392	-0.087831	-0.16514	0.114811
275	0.895708	2.94008	0	0	0	0	0	0	-0.00857893	1.25395	0.741637	1.47652	0.61231	-0.210027	-1.46124	-0.287211	-0.561898	-0.655991	-0.236757	0.419326	0.571548	-0.0103683	1.43066	-0.179224	-0.575088	0.328731	0.257612	0.132009	-0.301804	0.122219	0.486506	-0.526685	0.139448	-0.537459	-0.687799	0.166445	-0.334512	-0.312775	0.553258	-0.0840819	-0.0096192	0.441072	0.252836	-0.0649674	-0.210061	-0.0338464	0.0456763	0.249459	0.191904
276	0.910689	-3.20814	0	0	0	0	0	0	-0.0466888	0.030058	-1.59709	1.48045	0.0829835	2.06668	-0.281243	-0.0530148	-0.149286	0.488274	0.690676	0.597659	-0.23114	0.341026	-0.0130591	0.50906	0.446399	-0.0730996	-0.339406	-0.831599	0.0914529	-0.22098	-0.194465	0.568572	0.111207	0.358294	0.0628221	-0.00538336	0.00161172	-0.0626273	0.0395475	0.16053	-0.137758	0.292217	0.613772	0.16037	0.309159	-0.18648	-0.062855	-0.146538	-0.0534883
277	0.891185	-2.30031	0	0	0	0	0	0	0.0543064	0.270937	-1.60266	0.797694	-0.275204	-1.02602	-0.252107	-1.36314	0.879632	-1.52901	-0.422692	0.409882	0.444422	-0.218952	-0.655744	0.202096	-0.026896	-0.0613547	0.498581	0.120563	0.482637	-0.254626	0.353888	0.112375	-0.735186	-0.0944761	-0.416115	-0.0543368	-0.139283	0.0737817	-0.0137274	-0.33142	0.0137617	0.108755	-0.228519	-0.179106	0.0217269	0.189221	0.195544	0.436647	-0.200973
278	0.989405	2.96411	0	0	0	0	0	0	-0.100072	-0.209946	3.29698	-0.282463	-0.390687	2.22609	-1.06903	-0.931534	0.123607	-0.907293	-1.38073	0.11437	-0.574621	-0.920775	0.26647	0.112489	0.357644	1.0255	-0.443524	-0.368043	0.444783	-0.464452	-0.105271	0.0803153	0.357056	-0.0238694	0.0522637	0.121789	-0.443974	-0.148599	-0.0979061	-0.0617799	0.85904	0.0324212	0.184136	-0.218102	-0.402679	-0.403702	0.419371	0.161469	-0.395883
279	0.929995	2.76507	0	0	0	0	0	0	0.0102282	-2.5777	2.06722	-0.994524	1.75215	1.24923	0.686816	-0.722555	-0.563436	-0.646939	-0.430202	-0.687867	0.913244	0.195366	1.18327	0.0239473	0.305342	-0.3368	0.798968	-0.139353	-0.412264	-0.611393	-0.0362377	-0.233252	0.48002	0.0516461	0.6149	-0.364059	0.246856	0.134613	-0.555798	-0.556408	-0.0463104	0.185489	-0.0784373	-0.490163	-0.556685	-0.453579	-0.173452	0.105782	0.142046
280	0.959898	3.11562	0	0	0	0	0	0	0.0537494	0.875662	0.847072	0.0763019	0.601745	1.57369	-0.414572	-0.000518442	0.769558	-0.778126	0.925906	0.540405	-0.112302	0.642809	-0.62518	0.430031	-0.164145	0.199579	-0.630296	-0.0597827	0.175567	-0.654481	0.331556	-0.146667	-0.0206948	0.0613059	-0.0551995	-0.525692	-0.128066	0.0716534	-0.146264	-0.46867	0.355625	0.239012	-0.220838	0.197669	0.0591878	0.0280516	-0.230869	0.0264528	-0.163907
281	0.940981	3.23547	0	0	0	0	0	0	-0.149427	0.903485	2.16424	-3.20313	2.03837	-0.165293	-0.392813	0.237973	-0.526545	0.265807	-0.144478	-0.740659	0.646826	-0.203609	0.679509	-0.658265	-0.328896	-0.0244667	-0.0175257	-0.606329	0.0138122	0.290804	0.500056	0.118853	-0.468825	0.11009	0.313087	-0.290146	-0.119095	0.331062	0.132454	-0.351745	0.026517	-0.211479	0.155998	-0.316213	0.0657691	0.0613527	-0.289482	-0.205862	-0.111779
282	0.953106	2.86967	0	0	0	0	0	0	-0.190448	0.0893011	0.292468	-1.09739	1.3792	-1.12896	0.686186	0.00549401	0.000775353	0.841829	0.0323842	0.991376	-1.66411	-0.107635	-0.0181	0.256472	0.710948	0.429239	-0.223142	-0.0782052	-0.0105688	-0.109345	0.114358	-0.0684093	0.0414448	-0.100063	0.680691	-0.214272	-0.0298953	0.136887	-0.34284	0.511035	0.342719	-0.348145	0.346523	-0.653806	0.098944	-0.0349147	-0.1822	0.169197	0.418905
283	0.902874	2.71484	0	0	0	0	0	0	0.0200546	-0.26607	0.353564	2.51574	-0.936205	-0.487159	1.68163	-0.265808	-1.11155	-0.340097	0.45062	-0.918939	0.150115	-0.153605	-0.357417	0.229448	-0.322302	0.867131	-0.136429	0.582086	0.064965	-0.0118167	-0.356299	0.0586766	0.244618	-0.0284073	0.324506	0.0733634	-0.259927	0.113821	-0.00422294	-0.276773	0.0925593	0.0149368	0.100148	0.359868	0.0457475	0.141235	0.312245	-0.0999893	-0.0227026
284	0.933909	2.60485	0	0	0	0	0	0	0.0579583	1.21669	0.621209	0.412348	-0.235788	-0.898807	-0.744506	0.348783	-0.146084	-0.917846	-0.49324	0.811433	-0.0289291	-0.212214	-0.285431	1.05065	-0.230598	-0.565267	0.645805	0.324119	-0.439823	0.618112	-0.203038	-0.313659	-0.257745	-0.714935	-0.157932	-0.429108	-0.0980657	-0.223507	0.18676	-0.351683	0.345122	-0.0283126	-0.0474211	-0.0884632	-0.0733733	0.11607	-0.320423	0.00338285	0.161093
285	0.978606	3.49745	0	0	0	0	0	0	0.0414318	-1.71205	-0.0972442	3.22475	-0.226814	-0.969044	-0.417999	-0.258904	-1.43106	0.285243	0.243639	0.139725	0.207602	-0.236891	-0.143568	0.572143	-0.273351	0.664399	-0.324904	-0.899074	-0.249751	0.336163	-0.356807	0.0572414	0.305896	-0.244486	0.305756	0.091622	0.245516	-0.306728	0.0351833	-0.00654969	-0.313791	-0.468562	0.00818179	0.233253	0.169992	0.154215	0.289035	-0.337703	0.254721
286	0.952922	3.15904	0	0	0	0	0	0	-0.0265561	-0.150452	1.56508	-0.705293	-0.742091	-0.918035	0.731945	-0.153245	-0.654095	0.488607	0.798936	-0.224433	0.10623	-0.454462	-0.187873	-0.39711	0.380275	0.134155	0.609876	0.477594	0.253293	-0.16234	-0.172133	0.205087	0.230038	-0.240291	0.45823	0.456507	0.253025	-0.409888	-0.368333	0.221191	-0.158416	0.0907458	-0.643421	0.390408	-0.540011	-0.369415	0.321572	-0.163836	-0.0661308
287	0.930666	2.61606	0	0	0	0	0	0	0.0502962	0.481736	-0.803552	1.79184	-0.563385	-0.216081	-0.982458	-0.902845	-1.8216	-0.612971	-0.112893	1.17786	-0.410638	-0.286002	0.337132	0.09251	-0.297298	-0.0566695	-0.0132555	-0.223398	0.250109	-0.146731	0.231985	-1.08382	0.158283	-0.154148	-0.412168	0.172826	-0.0720296	-0.13706	0.099973	-0.0150563	-0.45391	-0.225769	0.000572253	-0.0283928	-0.0834026	-0.0492745	0.0138808	-0.320307	0.120631
288	0.954581	-3.42089	0	0	0	0	0	0	-0.0038914	2.60688	-3.01149	0.604426	0.0450632	-0.491182	0.14266	-0.43123	-1.55663	-0.484143	0.0967553	-0.0440538	-0.517084	0.0681024	-0.258441	-0.0469872	-0.914799	-0.308877	0.436993	0.463542	0.541478	-0.648397	0.474167	-0.322538	0.141243	-0.268788	-0.206157	0.31831	0.39552	-0.330546	0.123358	-0.293035	0.0286235	0.0876996	0.137483	-0.180636	0.109513	0.372228	-0.0654116	-0.0344529	-0.0583649
289	0.953929	3.16188	0	0	0	0	0	0	-0.156789	1.78749	-0.286173	-0.227142	0.119083	-1.19889	0.578237	0.534359	-0.40947	-1.42381	0.305085	1.51297	-0.0643485	0.168085	-0.860301	-0.690535	0.384478	0.321517	0.00956638	-0.122	-0.202141	0.47575	-0.275165	-0.60188	-0.213571	-0.00892549	0.0972113	0.408207	-0.154252	-0.184679	0.373992	-0.530593	-0.341827	0.0749767	-0.0679669	0.0447715	0.612878	0.157297	0.0404812	-0.271044	-0.336151
290	0.868697	-2.89556	0	0	0	0	0	0	-0.0503208	-0.558683	-0.348144	-1.3294	-0.61709	-0.988549	0.0110586	-0.402473	-0.508614	-0.304146	-0.231324	-0.792771	-0.953999	-0.209489	-0.518383	-0.380721	0.269591	0.149477	0.044563	-0.152424	0.194233	0.27292	-0.0730478	-0.417157	-0.0683202	0.0258825	-0.305419	0.0121731	0.244842	-0.222186	0.374673	0.0959508	0.0337658	-0.113263	0.177928	-0.0379368	-0.00520896	0.0243132	0.204575	0.0926756	0.0755834
291	0.923553	2.62983	0	0	0	0	0	0	0.0252915	-1.58969	-0.140538	0.464288	-0.407217	0.973389	-0.568561	0.268835	1.27283	-1.20989	0.436718	0.596827	-0.391563	0.130272	-0.26578	0.134419	-0.637391	-0.219157	0.177027	1.19688	0.202919	-0.411282	0.716758	0.103065	-0.173727	0.262842	0.216463	-0.0867923	0.226237	0.138641	-0.31546	-0.488553	-0.226732	0.104393	-0.157224	-0.122691	-0.202296	-0.0371286	0.164224	-0.171751	-0.408956
292	0.878845	2.52255	0	0	0	0	0	0	0.0395648	1.80663	-1.95206	-0.694794	-1.7492	-0.90467	1.11599	-0.396919	-0.900817	-1.62583	0.299801	-0.390138	-0.392108	-0.911422	0.0234426	0.684388	-0.741554	-0.459945	0.370241	0.46603	0.100912	0.0363915	0.185407	0.16153	-0.352612	-0.00767258	-0.694827	-0.381962	0.193137	-0.791162	0.0932323	-0.112159	-0.0881493	-0.0112404	0.0968966	-0.10575	0.146182	0.290597	-0.196903	0.281794	0.535806
293	0.924175	2.53157	0	0	0	0	0	0	0.0998448	-0.125802	0.743809	2.03608	1.13488	0.565027	-0.47369	-0.368306	0.499267	0.302343	0.413214	1.15802	0.13008	0.387657	0.687801	0.11869	0.0816889	0.244493	0.0818151	-0.346801	-0.306031	0.736907	-0.167338	-0.301172	0.69678	-0.125097	-0.269683	0.247198	0.106902	-0.127298	-0.158294	-0.11992	0.194733	-0.363958	-0.135125	0.502291	0.0518183	-0.152736	-0.0700206	-0.122911	-0.0272438
294	0.980576	-2.98915	0	0	0	0	0	0	-0.0928358	0.656209	0.203274	-1.70774	0.580031	-2.61848	0.463789	0.817872	0.161768	-0.20944	-0.689245	0.523074	0.287693	0.384611	-0.535472	-0.372784	-0.353068	-0.197336	-0.0880259	0.247495	0.2812	0.0358731	0.0826688	-0.510014	-0.37903	-0.411191	0.345949	0.438347	0.0893908	0.540578	-0.131239	-0.139219	0.182162	-0.394798	-0.0882496	-0.0988851	0.260584	0.620949	0.116574	-0.279276	-0.222323
295	0.912876	2.90035	0	0	0	0	0	0	-0.141909	0.408464	2.0142	-1.96273	0.781043	0.0163554	0.759188	-1.17356	0.193002	-0.969351	-0.774918	-0.62836	-0.158361	-0.28907	-0.193205	-0.59923	-0.257325	-0.400405	-0.185158	-0.202287	-0.419068	0.240912	-0.700087	0.294414	-0.123932	0.489253	0.351475	0.36633	-0.196849	0.0934892	0.00331891	-0.192278	0.110545	0.134029	0.29175	-0.145815	-0.167823	-0.17581	0.162967	-0.0928023	-0.22577
296	0.877626	2.90828	0	0	0	0	0	0	-0.0685888	1.96733	-0.499713	-0.334397	0.581838	0.839899	0.929783	0.907441	-0.188616	-0.808969	0.231082	0.198841	-1.03579	0.0960736	0.27268	-1.13035	0.759478	0.0551961	-0.715694	0.232908	0.333638	0.0642717	0.0678093	-0.0131557	-0.234067	0.0297633	0.202296	0.697808	-0.569321	0.25125	0.0470188	-0.210154	-0.0950665	0.19447	0.481308	0.0458199	0.283548	0.0177753	-0.28395	0.114938	-0.549174
297	0.954144	3.9482	0	0	0	0	0	0	-0.0345094	-1.90765	-0.464041	2.41607	0.516934	0.355521	-1.45616	-0.125659	0.25585	-0.203001	0.741996	0.137443	-0.00766159	0.136959	-0.296762	0.748701	-0.196846	0.824854	-0.166098	0.0185766	0.100103	-0.647529	-0.0581044	0.217751	0.00721209	0.0471457	0.189904	0.0099133	-0.190612	0.457532	0.0890268	-0.532513	-0.288402	0.365892	-0.00192845	-0.303049	-0.27842	-0.000383902	0.381107	-0.118474	-0.435897
298	0.928694	2.72037	0	0	0	0	0	0	0.0438248	-0.571367	-0.991737	1.4978	0.107659	1.0943	-1.1356	0.104484	-0.447883	0.573269	-0.597575	-0.0598129	-0.0121125	0.504618	0.311533	0.354369	0.650691	0.0477881	0.636198	-0.293416	0.431535	-0.817293	0.344611	-0.166989	0.0727203	0.290185	-0.539016	-0.0207909	0.193425	-0.225743	0.0203855	-0.0561097	-0.336992	0.219322	0.113826	0.0488149	-0.101026	-0.450243	-0.0720903	0.419899	-0.309175
299	0.882187	3.08748	0	0	0	0	0	0	0.128973	0.728244	0.871525	1.51266	1.6643	-0.125992	1.05763	1.23903	0.947916	-1.0439	0.282131	-0.0735454	0.185879	0.513201	0.509524	1.04692	-0.017861	-0.127035	0.969251	0.548368	-0.233027	0.570718	-0.158769	0.0915064	0.336332	-0.303526	0.519779	0.27063	-0.135153	-0.101376	0.250155	-0.304949	0.427029	-0.0322126	0.0570739	0.0977901	0.158183	0.117545	-0.104899	0.249545	-0.136215
300	0.853589	-2.62977	0	0	0	0	0	0	0.0415357	0.95009	-0.0786826	0.12806	-0.652839	0.00818819	0.120263	1.29189	-1.29526	0.350997	-0.706225	-0.0427916	-0.434628	-0.206063	0.628324	-0.011531	-0.115469	0.0745339	-0.0901996	0.0499541	0.0164163	0.589094	-0.580971	-0.0274805	-0.152749	0.0892515	-0.19361	-0.258123	0.123213	-0.361739	0.423365	0.024543	0.168572	-0.253207	-0.00906635	-0.0620079	0.561736	0.616598	-0.234574	0.100756	-0.333028
301	0.969022	3.10642	0	0	0	0	0	0	0.0873351	-1.26827	-1.83474	1.63391	-0.0106895	-0.823093	-1.12518	-0.68035	-0.873971	-0.64856	-0.372681	1.13556	-0.0842771	0.0779207	-0.0121197	0.270329	0.188677	-0.377668	0.57544	-0.583209	-0.178561	-0.344806	-0.105979	-0.265623	-0.105988	0.255506	-0.181793	0.615149	-0.14187	0.538502	-0.0794993	0.184941	-0.39683	0.315196	0.0181942	0.0958276	-0.268867	-0.187413	0.172417	0.00780308	-0.0716301
302	0.869182	2.7757	0	0	0	0	0	0	-0.0332808	0.293645	3.09992	-0.264196	-0.8244	-1.20189	0.449383	0.767163	-0.185167	0.636096	-2.05608	-0.219506	-0.170023	-0.593471	0.462911	0.436486	0.00225648	0.23945	-0.019957	0.0799105	0.00227951	0.263724	-0.249062	0.178622	-0.625964	-0.195231	-0.00370383	-0.898993	-0.0148204	-0.223002	0.00607142	0.0443815	-0.11325	-0.121488	0.16318	0.313419	-0.149064	-0.0751306	-0.129311	0.344641	0.25752
303	0.9452	3.19801	0	0	0	0	0	0	-0.00359086	-2.17496	-0.506384	1.27753	0.23093	-0.828465	0.291837	0.30938	0.69979	0.992161	0.629467	-0.767219	0.814517	-0.907405	-0.596195	0.505334	-0.18337	0.0219586	-0.0365767	0.383572	-0.175452	0.160563	-0.507401	0.174247	0.418669	0.00748359	-0.42194	0.336909	0.155378	0.0642625	-0.119346	0.0663143	-0.499731	-0.549207	0.421686	-0.0708329	0.448661	0.283792	0.250881	-0.333784	-0.135183
304	0.965687	3.24729	0	0	0	0	0	0	0.00728834	1.45895	-1.64658	-0.439535	-0.00435124	-0.402454	0.0563226	-0.337981	2.27703	-0.382934	1.01304	0.23961	-0.613053	-0.627653	-1.19584	-0.450327	-0.450603	-0.0570113	0.20264	0.38594	0.387199	-0.163518	-0.124354	-0.178174	-0.137959	-0.255554	-0.00605752	-0.0379669	-0.209186	-0.393906	-0.480151	0.139696	0.0427524	-0.0991087	-0.0251058	0.196228	-0.133935	-0.0519209	0.188584	-0.00785983	0.210377
305	0.851695	3.08836	0	0	0	0	0	0	-0.00918187	-2.11289	-3.58203	0.230749	-1.87984	1.62502	2.22924	1.12657	1.8448	0.168588	-1.20091	-0.286749	-0.01978	-0.626559	0.352419	1.12771	-0.158813	0.82812	-0.391863	0.0565324	0.439374	-0.301774	0.267172	-0.098108	0.0422416	0.676664	-0.0907182	0.219803	0.497631	0.550221	-0.45097	-0.171277	-0.483487	-0.269125	0.160472	0.378339	0.228191	0.460764	-0.396377	-0.0186061	-0.131624
306	0.992631	2.69484	0	0	0	0	0	0	0.0813709	-2.62476	-0.383862	-1.22012	-1.06982	-0.895084	-0.886244	-0.348733	0.952731	-0.935876	0.875729	-2.10491	-0.351059	0.276441	0.662579	0.374043	0.0565807	-0.291161	-0.275553	0.572014	0.412252	-0.247603	0.161897	0.645587	0.11635	0.265654	0.0342487	0.104254	0.685619	0.178115	-0.110114	-0.00683216	-0.14128	0.166934	-0.170798	-0.144642	0.0934954	0.178796	-0.143962	0.0675969	0.0784795
307	1.04704	4.07423	0	0	0	0	0	0	-0.0551725	-2.34861	1.88218	-1.90094	0.431824	0.00244486	0.65214	0.447281	1.45434	0.0749035	0.818013	0.217444	0.801466	-0.223355	-0.219596	0.117388	0.736688	-0.0616003	-0.179431	-0.230631	-0.199778	0.424485	0.0713384	-0.536479	0.314352	0.167551	0.662238	0.362358	-0.220537	0.438896	-0.426924	-0.235844	-0.249991	-0.11473	-0.373955	0.0115838	-0.465728	-0.42825	0.0282047	-0.0890859	-0.228985
308	0.963965	2.94593	0	0	0	0	0	0	-0.0454147	1.19502	0.67087	-0.599134	-0.609537	0.0785955	-0.107139	-0.0956022	-0.182227	-0.675116	-0.0368557	0.161423	0.126552	-0.407392	-0.361723	-0.203477	-0.145953	0.801401	-0.639673	0.141879	-0.749031	0.797066	-0.713609	-0.0725085	0.0770687	0.35771	-0.0348172	0.122336	0.235098	-0.21936	-0.0543862	0.246599	0.0660181	0.192677	0.18355	0.429129	0.103316	0.338457	-0.0359944	-0.00952393	-0.0951671
309	0.998496	2.93515	0	0	0	0	0	0	-0.180437	3.14797	-1.14066	-1.80626	-2.03951	-1.69349	-0.516011	-0.392781	-0.423861	-0.678628	0.0275346	0.696317	0.179057	-0.0457685	-0.376253	-0.0193318	-0.0462225	0.142281	0.545698	-0.350841	-0.520157	0.329814	-0.622685	-0.00364516	-0.0666881	-0.306244	-0.152357	-0.171731	0.231103	-0.457149	0.43563	0.117493	0.140465	-0.0834537	0.0424617	-0.104222	0.368478	0.18623	0.152693	-0.178779	0.322982
310	0.910578	3.06905	0	0	0	0	0	0	-0.0285705	-2.20076	1.93548	0.250243	0.993072	-0.23525	0.705618	-0.615383	-1.21886	0.262945	-1.25507	0.28348	0.727112	-1.37506	-0.235578	-0.105518	0.184458	-0.148819	0.0400534	0.451047	0.626834	-0.681009	0.309594	-0.0769703	0.184241	-0.0926934	0.575633	0.333993	-0.657651	-0.076976	-0.227292	-0.0195652	0.31245	-0.454898	-0.180119	0.425812	-0.574233	-0.226252	-0.0553712	0.276638	0.0966892
311	0.894862	2.85412	0	0	0	0	0	0	-0.147542	0.0691273	-1.58026	-2.67284	-0.642946	-0.957907	0.186767	-0.0564545	0.387135	0.580724	0.151821	-0.482596	-0.0552498	0.981041	0.760307	-0.623279	0.726442	0.209368	0.0459178	-0.365746	0.275533	0.0164173	0.133972	0.0571806	0.367796	0.0569937	-0.43124	-0.103079	0.689211	0.0398687	0.477811	0.214337	-0.122636	0.389854	0.0814312	-0.014307	0.27909	0.326846	-0.331589	0.00372296	-0.273032
312	1.03089	3.52216	0	0	0	0	0	0	-0.00382024	-1.99391	0.873628	-0.734218	1.07802	0.651519	-1.55544	-0.197276	-0.496327	-0.528725	0.909534	0.0442301	-0.626239	-0.212994	-0.666327	0.628779	0.764692	-0.346616	-0.121894	-0.0855521	0.594226	-0.108782	0.0242334	0.368041	-0.197314	-0.00553153	0.24263	0.128315	-0.286058	-0.260873	0.0814311	-0.523874	-0.281677	0.415229	-0.0878747	-0.227554	-0.594399	-0.64453	0.104982	0.0562698	-0.370466
313	0.9772	2.74695	0	0	0	0	0	0	-0.0390737	-2.3419	2.01735	1.63721	-0.423522	0.768117	0.611601	-0.986207	0.659447	0.688388	0.343815	-0.297508	0.533147	-0.573049	-0.28461	-0.241228	0.510653	0.270508	-0.188721	-0.18656	-0.0685231	-0.246428	-0.0539646	-0.301823	-0.0437343	0.449266	-0.0086597	-0.237693	-0.38123	0.273246	-0.37636	0.259127	0.0377271	0.285133	0.0494315	0.374591	-0.332567	-0.28686	0.159255	0.467321	0.15195
314	0.919084	-2.83819	0	0	0	0	0	0	-0.100404	-1.60781	0.106479	-0.586981	0.293957	0.456491	1.86192	0.641976	0.203222	0.775625	0.404404	1.0169	0.595089	-0.226164	-0.729731	-0.468384	0.683457	-0.504879	-0.836862	0.259953	-0.361413	-0.114768	-0.107868	0.0136122	-0.126382	0.304705	-0.449575	0.010008	-0.166986	0.0901836	0.238443	0.310159	0.192123	0.0474002	-0.593688	-0.460741	0.341385	0.0800745	-0.136981	-0.395321	0.38237
315	0.947905	2.75234	0	0	0	0	0	0	0.0586019	-1.47899	-1.00156	0.202387	-0.961243	0.699716	1.55277	-0.719716	0.328586	-0.664446	-0.779476	-0.755998	-0.282597	0.575131	-0.192072	-0.255038	-0.902478	-0.719692	-0.00480551	0.474762	0.109955	-0.404461	0.371531	0.611754	-0.0894769	0.0467848	0.0256553	-0.366076	0.8879	0.239557	-0.535416	0.0531499	-0.0102756	-0.148445	-0.100933	-0.0310016	0.0990018	0.0309904	0.252433	-0.107667	-0.240522
316	0.981161	3.88048	0	0	0	0	0	0	-0.0126231	-1.7226	3.03135	0.0181296	-2.29342	0.604272	-0.314974	-1.30587	-0.690206	-1.54601	-0.351119	-0.660815	0.401311	-0.896571	0.594917	0.717734	0.464722	-0.719011	-0.186024	-0.201371	-0.0144805	0.334577	-0.181806	0.115269	0.351061	0.395421	0.0831724	0.27254	-0.388327	-0.296246	0.326604	-0.292751	0.252947	0.281314	-0.317497	0.0692829	-0.527915	-0.46279	-0.48191	0.302827	0.225665
317	0.840483	3.2487	0	0	0	0	0	0	-0.0834079	1.10836	-0.126751	-0.649128	0.521909	-1.0136	-0.693819	0.392189	-0.704544	-0.659193	-0.0488743	0.455528	-0.33906	0.266234	-0.396599	-0.391111	0.244866	0.717872	0.284638	0.531991	0.022003	-0.124122	-0.48613	0.214733	0.136512	0.0178112	0.0967747	0.0225928	-0.181898	0.0823542	0.219487	-0.638619	-0.194169	0.158157	0.234167	-0.0365333	-0.43479	-0.391204	0.46987	0.00826541	-0.253585
318	0.941686	-2.77268	0	0	0	0	0	0	-0.0162334	-0.924072	-0.935236	1.62592	0.0883946	1.16001	0.490041	0.159127	-0.249855	0.260639	0.735794	0.804386	0.721557	0.423798	0.220087	0.548372	-0.35171	0.433153	0.620431	1.04041	0.333293	-0.665314	0.65699	0.364804	0.629066	0.0933368	0.716124	-0.231319	0.421339	0.0659719	-0.129431	-0.410765	-0.298201	0.228803	0.198508	-0.430074	0.00457676	-0.0300459	-0.188565	0.040942	-0.267762
319	0.912409	2.75489	0	0	0	0	0	0	0.00362745	-1.07435	-0.321682	0.949137	-1.26812	-0.100514	-0.493425	-0.726769	-0.368425	0.639759	0.38155	-0.701445	-0.87988	-0.97901	-0.438534	-0.815179	0.869604	-0.232632	-0.419494	0.0221048	-0.289032	0.430022	0.0060386	0.355789	-0.202728	0.0842447	0.181145	-0.057173	-0.246372	0.883148	-0.175125	0.230699	-0.0237636	0.720008	-0.231277	0.279787	0.00409603	0.202912	-0.103209	-0.114403	0.0510951
320	0.929987	2.69346	0	0	0	0	0	0	-0.022109	4.43204	-1.51926	0.992138	1.37617	1.25551	1.34698	0.0514928	1.10913	-0.581761	0.998185	0.385055	-0.16399	0.21521	0.0359038	-0.480113	-0.388963	0.0575872	-0.748955	0.044536	-0.997925	0.315936	-0.270487	0.259964	0.175005	0.0584093	0.410968	0.230132	-0.140095	0.316302	-0.291032	-0.022906	-0.237182	-0.0642603	-0.106029	-0.0243894	0.777686	0.403309	-0.0841827	0.302232	0.166494
321	0.884632	-3.28594	0	0	0	0	0	0	0.0100398	-1.30635	0.784122	-0.168592	0.259809	-0.111015	1.00377	-0.529985	0.356243	0.134512	-0.265799	0.359979	0.416339	-0.517986	-0.473552	0.0600908	0.708761	-0.408882	0.219265	-0.575098	0.252226	0.125598	0.228333	0.0454499	0.0915661	-0.0303172	0.39923	0.454787	0.120405	-0.102663	0.0629989	0.570098	0.590946	-0.119838	0.454172	0.0442503	-0.423724	-0.450847	0.303711	-0.184375	-0.222827
322	1.00079	2.87304	0	0	0	0	0	0	-0.0784938	0.539296	-0.795914	-0.663097	2.40382	-0.885093	-1.33337	1.59122	-1.16303	0.173127	-0.538483	0.337886	-0.124798	0.751979	-0.318957	0.363897	-0.284602	-0.446707	0.485591	-0.389507	-0.226748	0.101402	0.181316	0.350506	0.197159	-0.272888	-0.205042	0.279326	0.148268	-0.032652	0.0572723	0.0385099	0.381747	-0.0447358	0.0501403	-0.164655	0.0405341	-0.17543	-0.182424	-0.227959	-0.200656
323	0.996873	3.10299	0	0	0	0	0	0	0.00227249	-0.261883	1.01106	1.01527	0.543357	1.46142	0.259606	1.00316	-1.82757	0.455043	-0.588247	2.12165	-0.100307	-0.175451	0.00259937	-0.34783	0.27709	0.168261	0.725688	-0.0822181	0.547988	-0.514052	0.328471	0.0233697	0.188653	0.0289869	0.255348	0.0918862	0.262747	0.192426	0.0444731	0.1301	0.114564	-0.113189	0.603633	-0.411833	-0.0549194	-0.630402	-0.0976104	-0.0181628	-0.379675
324	0.943391	3.02666	0	0	0	0	0	0	0.0596511	1.01138	-2.62293	0.338054	-0.889023	-0.608064	-1.02536	1.58905	-0.690236	-0.0127815	0.449367	-1.26256	0.556516	-0.386672	-0.346395	0.772343	-0.898634	-0.381909	0.226479	0.451165	-0.177326	0.130629	0.439316	0.00396035	0.103872	-0.210451	-0.381763	0.252665	-0.207427	0.073023	0.454867	-0.433026	-0.584401	0.0733955	0.427183	-0.145477	-0.202286	0.222825	-0.0855186	-0.0736786	0.00658401
325	1.01694	2.81415	0	0	0	0	0	0	0.102137	1.32084	1.11173	1.68433	0.549711	0.356478	-0.275815	-1.09799	0.0762208	-0.22979	1.13311	-0.422965	0.590272	-1.35456	0.566189	-0.0286412	-0.064721	-0.511755	-0.443389	0.959381	0.691893	-0.278818	0.125939	0.26608	0.408741	-0.137514	-0.0651958	0.417133	-1.16625	0.25491	0.249051	0.109759	0.233967	0.16298	0.288692	-0.335921	-0.0538896	-0.2713	-0.243071	0.00557735	0.198108
326	0.946628	2.73771	0	0	0	0	0	0	0.0549652	-0.266709	-0.362558	1.08602	1.02451	-0.873542	-1.19382	0.698762	0.950579	0.29527	-0.776238	0.205484	-0.47559	-0.284216	-0.0387017	0.59757	0.271417	-0.864884	0.916335	0.534242	0.0765381	-0.0144844	-0.161232	0.570319	-0.332027	0.295628	-0.10782	0.0923479	-0.0288736	-0.156407	-0.0132937	0.258562	-0.148329	-0.310917	-0.152956	0.148891	0.0958022	-0.271683	0.128943	-0.0163385	-0.0253648
327	1.01356	3.73158	0	0	0	0	0	0	-0.192259	-0.584247	2.75995	-0.87363	0.579097	-0.10453	1.05246	1.07343	-0.189038	-1.35922	0.559997	0.692566	0.117865	-0.143626	-0.274576	-0.330381	0.391795	0.50645	1.84265	-0.961145	0.708412	-0.52844	-0.202178	0.298142	0.50264	0.123081	-0.00478154	0.426025	-0.386952	-0.0473724	0.109357	-0.314938	0.327845	-0.0355609	0.32273	-0.095955	-0.190477	-0.394635	-0.316326	-0.477479	0.359068
328	0.940599	2.79815	0	0	0	0	0	0	0.183596	-3.64794	2.27005	1.86975	-0.457958	-0.0447225	0.174127	0.0648139	0.0249579	-0.691702	-0.809406	0.373889	0.540098	0.0669225	0.0475161	0.19245	-0.233526	-0.599	-0.0489268	0.441501	0.288135	0.0836566	-0.0239781	0.0949202	0.301145	-0.253545	0.110375	-0.0682135	0.219822	-0.268225	-0.0218458	0.0215578	0.272694	-0.0807157	0.376328	-0.273044	-0.265668	-0.43331	-0.110604	-0.00211007	-0.0544735
329	0.983529	2.99534	0	0	0	0	0	0	0.00192913	1.03911	2.13148	1.14409	2.60905	-0.0710262	1.11798	-1.16185	0.547661	-1.58792	-0.80699	0.028202	0.19521	-0.461471	-0.478911	-0.137599	-0.710221	0.303592	0.419712	-0.229925	0.122821	0.0367705	-0.412765	-0.868165	0.0996175	-0.13028	0.085869	0.0493169	-0.800599	0.165281	-0.310313	0.0639716	0.200621	-0.143804	-0.160916	-0.136764	-0.0242259	0.130042	0.313016	0.136385	-0.0419755
330	0.855752	-2.71438	0	0	0	0	0	0	-0.0508731	-0.754754	0.241311	-0.722777	0.048198	0.788563	-0.884092	0.0566341	-0.91263	-0.141897	0.288337	0.635507	0.482205	0.190901	-0.703018	0.0662459	-0.112236	-0.714797	-0.448979	-0.630962	-0.525359	0.435821	-0.331727	-0.0490406	-0.161062	-0.25397	-0.201045	-0.0939336	0.0704972	-0.281308	0.0274326	0.114945	-0.0101958	-0.0442998	-0.231653	0.110167	-0.0670911	-0.122979	0.079004	-0.120309	0.155509
331	0.997378	2.70481	0	0	0	0	0	0	0.0583993	-3.20876	-0.874844	1.50535	-1.25281	1.13019	0.164332	0.689554	0.790137	-0.480127	-0.656914	-0.169019	0.355604	1.24636	-0.303598	0.661195	0.348944	-0.817593	-0.290536	0.297819	-0.272817	0.0216376	-0.0394348	0.173864	0.237375	0.245464	-0.50142	-0.0706789	0.482884	0.217677	0.00580795	-0.530061	-0.330222	-0.0890534	0.171713	-0.019579	0.2852	-0.679571	-0.161634	-0.0894595	-0.134792
332	0.914735	2.70796	0	0	0	0	0	0	0.00194402	0.513471	1.74129	-0.0723352	-0.509714	-0.369333	-2.47688	-0.193426	1.25993	-0.798101	0.803819	0.0262488	0.162227	-0.445968	0.451117	-0.219699	-0.0471872	0.426015	0.175794	-0.0865154	0.111152	-0.0471902	0.16956	-0.28533	-0.127406	0.118076	0.00691075	0.347963	0.120068	-0.186564	0.0665071	0.000375801	0.249956	-0.0220402	-0.0198299	0.460315	-0.756479	-0.448109	-0.244442	0.0429639	-0.074923
333	0.95827	3.25332	0	0	0	0	0	0	0.0573419	-2.84825	0.406924	0.314192	0.27843	0.332228	0.172463	-0.691853	-0.0500554	0.831947	-1.50707	-0.23496	0.637228	-0.21209	-0.132776	0.594025	0.36434	0.0493898	-0.509634	0.380596	-0.175186	0.113803	-0.437616	-0.185241	-0.428863	0.36045	0.0758437	-0.010969	0.32856	-0.0749432	0.083927	0.819988	0.0406104	-0.412092	0.142174	0.171316	-0.256849	-0.219174	-0.0982639	0.137012	0.33227
334	0.931561	-2.73334	0	0	0	0	0	0	0.0343819	1.28405	-1.03784	0.176977	-0.662114	0.521496	-0.644054	-0.543412	0.395531	0.550214	0.688854	0.313779	1.27164	0.623121	-0.243731	-0.0477701	0.0644261	-0.183202	-0.168781	0.665805	0.315335	-0.615543	0.193201	0.0178351	0.333569	0.108385	-0.273908	0.432144	0.364729	-0.418244	0.434699	0.145116	-0.114541	0.00125769	0.110575	0.152439	0.226439	-0.327543	0.446955	-0.360827	-0.336637
335	0.912081	2.98403	0	0	0	0	0	0	0.108725	-1.14544	-0.585126	-0.452486	-1.32413	0.131307	0.145963	0.554814	0.54749	0.272381	-0.518349	-0.372857	-0.912496	0.215365	0.4468	0.396976	0.456356	0.262221	-0.269671	-0.164016	0.0580233	0.0417293	0.137647	0.181131	-0.143114	-0.553074	-0.500648	-0.373377	0.132832	-0.00925338	0.254952	-0.0023697	-0.273772	-0.126561	-0.211054	0.0965778	0.227137	0.186298	-0.0274831	-0.138032	-0.326402
336	0.912107	3.25008	0	0	0	0	0	0	-0.00243724	-0.4849	-0.817247	-0.18973	0.852941	0.10713	-0.904224	0.70249	0.993465	-0.253508	-1.71512	0.285646	-0.184983	0.849198	-0.0785496	-0.267706	0.715602	-0.00194923	-0.214276	-0.416686	-0.135256	-0.042936	-0.40461	0.168837	-0.263679	-0.366003	-0.561264	-0.0378959	0.0331306	-0.0560499	-0.451329	-0.114687	-0.000931487	-0.165391	0.0309718	0.0631733	-0.0643298	-0.317514	0.147021	0.280012	0.111424
337	0.96953	2.78994	0	0	0	0	0	0	0.0668403	-1.98773	-0.692734	1.21451	-0.329658	0.709118	0.253358	0.0549753	-0.519847	1.19398	0.703308	0.24002	1.08473	-0.279766	-0.461298	0.705313	-0.0294267	-0.188584	-0.132752	0.12363	-0.410528	0.235403	-0.845448	0.36581	0.0300438	-0.0381156	-0.0286328	-0.174535	0.107113	-0.378751	-0.157562	0.469128	-0.516375	-0.107745	0.0887897	-0.107814	0.210722	0.257346	0.450769	0.234191	-0.417117
338	0.97294	2.79099	0	0	0	0	0	0	0.0981358	-2.05594	2.19835	0.925289	0.672858	-0.5634	1.56948	0.426239	0.844538	0.574528	-0.440147	0.141286	-0.642211	-0.868747	0.459149	0.774296	-0.344505	-0.451737	0.30296	-0.785219	-0.495007	0.030329	-0.157166	-0.106176	0.0863257	0.655363	-0.127412	0.0297006	-0.450721	0.491953	-0.117242	0.161586	0.368737	-0.0965354	0.151405	0.0526154	-0.115993	-0.0825425	0.336262	-0.258089	-0.00619292
339	0.961037	2.86284	0	0	0	0	0	0	-0.1073	2.12088	0.126589	-1.00402	-1.12871	-0.215149	-0.725761	-0.205503	0.700323	0.0128933	-0.44545	0.020844	0.908617	0.162683	-0.22813	0.48798	0.084171	0.198997	0.0984891	-0.281918	0.0162815	-0.238727	0.145399	0.0708804	-0.885492	0.780792	-0.597238	0.202141	-0.101793	-0.281207	0.153598	0.227074	0.390865	0.174959	-0.153904	-0.0529311	-0.160892	0.112209	-0.0200487	0.0611099	-0.0700471
340	0.878815	-2.51973	0	0	0	0	0	0	-0.149911	2.25369	0.321633	-0.191911	0.063806	1.38608	-0.322153	0.15562	0.0790386	-0.321264	0.577411	1.21446	0.602108	1.03883	-0.302545	-0.00136538	0.293745	0.972596	0.657867	-0.225536	-0.204096	0.677423	-0.28762	-0.14991	-0.388342	0.0760148	-0.548613	-0.608219	-0.333981	-0.644521	0.374929	-0.416141	0.187087	0.101895	0.101228	-0.101397	-0.0407651	-0.420868	-0.370442	-0.19789	0.0449251
341	0.854314	-2.45335	0	0	0	0	0	0	-0.0606991	-0.545819	-0.316682	0.223475	-1.06417	0.101615	0.977641	-0.506631	-0.20206	-0.045174	0.829291	0.607679	-0.16929	-0.43203	0.704817	0.643101	0.247862	0.464661	0.498756	0.100875	-0.158666	-0.518161	0.223745	0.332125	0.114135	-0.131726	0.410588	0.0374388	0.28514	-0.3647	-0.390896	0.360559	0.0425717	0.227547	0.00780879	-0.627222	-0.112803	-0.0362643	-0.202588	0.513959	0.548186
342	0.989376	2.79429	0	0	0	0	0	0	-0.049983	-0.458769	2.30425	-1.05422	-0.296561	0.449141	0.0506231	-0.287369	-0.263623	-0.579915	0.374851	-0.172092	-0.648875	-0.0353154	-0.52515	0.41404	-0.198258	-0.162869	0.940149	-0.14007	-0.0238378	-0.297086	-0.295152	-0.00977964	-0.136099	-0.138692	0.0868484	-0.101965	-0.309923	-0.0323049	0.01366	-0.174579	0.791038	0.856119	0.158557	-0.119957	-0.455817	-0.403588	0.347411	0.0589305	-0.236199
343	0.935911	3.05573	0	0	0	0	0	0	0.0891879	-1.06148	0.537151	-0.763292	-1.24837	0.202255	-0.917055	-0.81849	-0.311612	-0.630978	0.118097	-0.481356	-0.446319	0.380839	0.661237	0.473557	-0.177481	-0.260798	0.01417	0.0775504	-0.551845	-0.270758	-0.245417	0.0444247	0.459825	-0.104842	0.0419835	-0.273778	0.00298721	0.0880163	-0.190843	-0.202085	-0.142655	-0.0248649	-0.264076	0.351115	0.0891166	-0.106445	-0.174907	-0.327473	0.215718
344	0.935283	2.94361	0	0	0	0	0	0	-0.0823767	-0.682902	-2.53822	-2.68175	-1.9502	0.858927	0.112472	1.29144	-0.902412	-0.266036	0.819859	-0.388378	0.0905767	0.082854	-0.464569	-0.648817	-0.188359	-0.199616	0.599987	-0.29877	0.0643021	0.128007	-0.48057	0.132169	0.185388	0.156679	-0.278621	0.209068	0.556643	0.515779	0.0990374	0.0521564	-0.87092	0.807001	0.459894	-0.0404536	0.107293	-0.0606811	-0.0692414	0.304267	-0.25256
345	0.894662	2.61605	0	0	0	0	0	0	0.151438	-2.57212	-0.94456	2.04769	-1.38517	0.181127	-0.823772	-0.314474	1.11218	0.940967	0.0903475	-0.128382	0.770652	-0.715936	-0.469202	0.319636	-0.53991	-0.41296	0.194128	0.915427	-0.122564	0.0519962	-0.099375	-0.528653	-0.0996063	-0.151987	0.0218439	-0.205651	0.575597	0.221084	-0.411579	0.0371486	-0.0327069	0.220675	0.264997	-0.0315449	-0.409272	0.133729	0.37529	-0.113256	-0.0928769
346	0.96522	3.73808	0	0	0	0	0	0	0.023455	0.0388508	-1.14126	3.16837	-0.0690451	-0.875379	-1.63452	-0.123174	-0.464049	0.46656	1.42691	-0.241578	-0.246212	0.333871	-0.608601	0.406535	-0.0980331	0.513259	-0.306235	0.128111	-0.555063	-0.0772796	-0.053662	0.350659	0.864661	-0.483687	-0.0185383	-0.169681	0.012623	-0.520574	0.461783	0.288764	-0.256249	-0.00987141	0.251191	0.0885276	0.106721	0.147807	0.0768953	0.298607	-0.171511
347	0.939311	2.75822	0	0	0	0	0	0	-0.0348494	-0.634518	2.08803	0.0254584	0.370256	-0.132262	-1.67857	1.28728	-0.357248	0.147591	0.123856	1.0135	-0.741431	-0.318959	-0.538288	-0.509428	-0.80391	-0.376449	-0.673696	0.130317	-0.0589894	-0.110487	-0.252231	-0.401495	0.404407	0.34413	0.199026	0.159461	-0.412717	-0.0166884	0.239558	-0.202361	-0.485529	-0.0597427	-0.00657847	-0.571267	0.0231374	-0.151721	0.141694	0.196906	-0.134881
348	0.940842	2.56452	0	0	0	0	0	0	0.0874495	-1.97909	-0.635643	0.979548	-1.36916	0.504456	-1.24937	-1.0842	0.829354	-0.656074	-0.605901	0.112195	-0.0468483	-0.020069	-0.0177069	-1.4	-0.404654	-0.148674	0.197733	-1.30378	-0.037666	0.00855723	-0.594335	-0.0648427	-0.146441	0.176693	-0.696917	0.124529	0.266038	-0.384521	-0.498393	-0.138934	-0.0131042	-0.319191	0.606915	0.259955	0.200799	-0.388127	-0.068696	0.00327809	-0.0377623
349	0.995094	2.9065	0	0	0	0	0	0	-0.0389405	2.21803	-0.229869	-0.576579	1.41232	1.44538	-0.6018	0.303564	0.172888	0.162358	0.673833	-0.311342	-0.370614	0.296424	0.108465	-0.723976	0.299024	-0.663955	-0.861183	0.0440602	-0.148798	-0.30954	0.53834	0.1583	-0.170377	0.380981	-0.271244	0.0273361	-0.624114	-0.393016	-0.0821187	-0.162545	0.00964548	0.0165247	0.169165	-0.183201	0.121516	-0.322708	0.278312	-0.0134786	-0.0232281
350	0.930003	2.83886	0	0	0	0	0	0	0.0267749	-0.705405	-3.4338	0.461439	1.24673	0.054075	-0.679994	0.560008	0.22306	0.838165	0.101524	-0.0908957	0.802378	0.674535	-0.0339297	0.246518	0.40776	-0.0426153	0.322372	-0.364243	-0.448296	-0.14912	0.448586	0.0507968	-0.037106	-0.0492927	-0.199753	-0.377761	0.14168	0.190318	-0.217143	-0.261545	-0.210941	0.0197409	0.178808	0.312532	-0.213341	-0.173402	-0.0603876	0.0250087	-0.457804
351	0.974392	3.18264	0	0	0	0	0	0	0.103089	-2.21492	-1.23227	-0.12248	1.22076	-2.56685	0.13347	-0.725943	-0.83669	-0.0247978	0.782824	0.255273	0.798323	-0.0230064	-0.113916	-0.377822	0.713502	-0.658225	-0.136755	-0.715082	-0.218062	0.145521	-0.597697	-0.0420311	0.0763323	-0.263947	-0.195162	0.580805	0.0955819	0.551069	0.186007	0.269305	-0.505634	0.211237	-0.158631	0.248803	-0.0541716	-0.195839	0.0215614	0.053499	-0.0440818
352	0.878502	-3.16504	0	0	0	0	0	0	0.106783	-0.469234	-1.39664	-0.660914	0.285425	1.41374	-0.624809	0.577628	0.272785	1.06259	-0.807293	-0.411732	1.25308	-0.11643	-0.414118	0.209802	-0.894642	-0.504704	0.0432903	-0.606416	0.342971	-0.58966	0.624797	0.31749	-0.419901	-0.528501	0.0234271	0.320823	0.368806	-0.122776	0.278777	-0.0365836	0.36117	-0.00772755	-0.176968	0.0478688	-0.516516	0.230541	-0.052731	-0.017046	-0.17234
353	0.944468	2.77971	0	0	0	0	0	0	0.0425595	-1.74634	1.5073	1.39721	-0.0645017	-0.745502	0.0500039	-0.00646838	0.0085765	-0.125679	-1.15005	0.0896739	-0.38583	-0.437273	0.49021	0.700914	0.311982	-0.0764971	0.293714	-0.427253	-0.167061	0.398497	-0.065483	-0.138677	0.0962008	-0.0217452	0.318044	0.294361	-0.302241	0.28818	-0.354645	0.0573817	0.412195	-0.0193015	-0.022726	0.0878011	-0.411183	-0.345899	0.00975653	0.0638506	-0.178603
354	0.90227	-3.01851	0	0	0	0	0	0	-0.0399015	0.522866	3.00727	-1.54082	-0.616441	-0.178582	-0.899763	-0.987283	-2.83449	-0.895514	-0.694991	-0.287158	-0.577593	0.529323	0.0458639	0.493173	-0.135805	-0.128924	0.159089	0.201786	0.0460009	-0.0342423	0.0381761	0.20635	-0.213295	0.324714	0.0610626	0.190346	0.190426	-0.312032	0.38316	-0.0793642	0.37501	0.096514	-0.226779	-0.144249	-0.507503	-0.490929	-0.185111	-0.238862	0.00612782
355	0.953972	2.83528	0	0	0	0	0	0	0.13533	0.128519	0.168061	0.649765	-2.10575	-0.868689	-1.47451	-0.132448	-0.187457	0.926655	0.267125	0.719044	-1.31333	-0.182758	0.0139943	0.0693281	-0.88653	0.195866	0.0134712	-0.610811	-0.0155053	0.127561	-0.372737	0.055724	0.212897	0.275874	-0.132174	-0.141223	0.191229	-0.541897	0.000335039	0.0928631	-0.455572	0.285911	-0.015814	0.502119	-0.0703534	0.0364879	0.18446	0.278358	-0.163531
356	0.918345	3.02797	0	0	0	0	0	0	-0.00871305	0.44222	-0.152167	0.91479	-0.915649	-1.71035	0.532418	2.09589	0.771244	0.210605	-0.38725	0.136265	-1.66039	0.0673507	-0.804013	-0.00796493	-0.813244	-0.241424	-0.423577	-0.883973	-0.247956	0.704983	-0.719552	-0.105096	-0.0526125	-0.35701	-0.380464	-0.314311	0.00784799	-0.0116379	-0.0819431	-0.0121345	-0.277754	-0.380191	-0.161821	0.503382	0.466991	0.281349	0.197692	-0.455592	-0.261614
357	0.91944	-2.58514	0	0	0	0	0	0	0.0301732	-0.375188	-1.31557	0.204086	0.609295	0.0660746	1.31279	-0.627745	1.35389	-0.580687	0.779945	0.3682	-0.0329245	0.107617	-0.0508788	0.428016	0.459001	-0.0992775	0.077253	0.222991	-0.157656	-0.227863	0.501245	0.416132	0.186007	0.0253036	0.30971	0.0859636	0.121521	0.171941	-0.36751	-0.269531	-0.138377	-0.0838769	-0.591728	-0.0769205	-0.0153425	0.0381113	0.209419	-0.127688	-0.16413
358	0.923996	-2.93914	0	0	0	0	0	0	0.0651935	-1.59755	0.477052	2.58664	-0.561367	-0.588676	1.54703	0.742855	1.52517	-0.118115	-0.0160526	-0.0164796	-0.748154	-0.59518	0.106398	1.03549	-0.187508	-0.168102	-0.65534	-0.413829	-0.510085	0.323374	-0.239596	-0.509016	0.0200682	-0.18247	0.156829	-0.0499128	-0.340707	0.172706	-0.022752	0.108086	0.464877	0.0286615	-0.0554538	0.477714	0.0485664	0.288517	0.177257	0.14028	0.00199554
359	0.848263	2.54398	0	0	0	0	0	0	0.00583856	0.895826	-0.963688	0.47755	0.857484	-0.479439	0.643456	0.730748	0.37887	0.514701	-0.452975	-0.513472	0.553843	0.131349	0.33498	0.703253	-0.500111	-0.0945908	0.17022	0.494607	-0.292025	0.434702	-0.295194	0.428706	0.341021	0.211077	-0.191865	-0.0158299	0.406158	0.174158	-0.176173	0.162738	-0.094546	-0.485494	-0.147003	0.0701875	-0.0110766	0.121769	-0.357678	-0.0224767	0.236551
360	0.942376	2.86593	0	0	0	0	0	0	-0.123132	3.24992	1.70534	-3.22858	0.868199	-1.27073	-0.955218	0.289361	1.52176	-0.301453	0.0355844	-0.0752801	-0.28144	1.05583	-0.161862	0.333901	-0.0204452	0.726657	-0.878724	-0.229351	0.29253	0.107974	-0.164174	-0.121352	-0.495454	0.0757625	0.442249	0.383286	-0.320155	0.262627	-0.112255	-0.0213927	0.80624	0.01426	-0.403921	0.0631644	0.0835839	0.466181	0.282148	-0.0512924	-0.219184
361	0.964591	2.9808	0	0	0	0	0	0	0.269763	-2.36414	-0.530852	0.914499	0.409764	2.10959	0.617655	-0.183329	-0.172544	1.33204	0.748256	0.240415	0.319993	0.686471	-0.231082	-0.551453	0.303946	-0.924198	0.143067	0.118663	-0.0211158	0.0254765	0.0200485	-0.0834066	0.372369	-0.130883	-0.174653	-0.190282	0.0471652	-0.0914565	-0.254815	0.216677	0.163512	-0.238283	0.559536	-0.128736	0.0880295	-0.195996	-0.0916363	-0.0693681	-0.288172
362	1.00229	3.03878	0	0	0	0	0	0	0.0721528	-0.266257	-2.98665	0.759619	-0.387847	-0.511929	1.78328	0.116954	0.352305	-0.217961	0.284036	0.40854	0.00111935	-0.0864819	-0.012577	-0.506615	0.487802	-0.152106	0.645258	-0.593406	-0.571933	0.120139	-0.333371	-0.228867	0.152963	0.372124	-0.387982	-0.226873	-0.0561529	0.216062	-0.253286	-0.196353	-0.459339	0.0224368	-0.236112	0.439308	0.382783	0.252445	-0.100338	0.0171104	0.275555
363	0.906526	3.50782	0	0	0	0	0	0	0.00382167	-0.15449	2.15013	-1.48729	1.21793	1.71201	1.44153	-0.587144	-0.245433	1.20404	0.153347	0.521019	1.14291	1.26358	0.370328	-0.287481	-0.342871	0.488966	0.532562	-1.09484	-0.0548147	0.190924	-0.469003	-0.466369	-0.139335	0.156299	-0.248869	-0.389523	0.111107	-0.135715	-0.158266	-0.0470718	0.648547	0.473122	-0.0276872	-0.0595236	-0.299771	0.328113	-0.0975408	0.0200801	-0.0685307
364	0.929519	3.11133	0	0	0	0	0	0	0.0761314	0.771667	-0.419253	-1.78925	-0.054748	1.25058	0.508055	1.57262	-1.11599	0.579115	0.677728	0.195953	-0.145196	-0.457871	0.114675	-0.503272	-0.420332	-0.0907883	-0.446951	-0.0278027	0.135934	0.20533	-0.305864	0.0295135	0.0657953	-0.304088	-0.00900684	-0.343265	0.0742759	-0.0529825	-0.028784	0.0927391	0.0502933	0.448933	0.15141	0.316649	0.359592	0.381601	-0.00699713	0.0434461	-0.486939
365	1.01257	3.18939	0	0	0	0	0	0	0.0308288	-1.65787	0.336381	3.01459	1.66367	-0.94195	0.679213	-0.661222	1.19722	-0.598341	-0.312222	0.619643	0.07993	0.7026	-0.920332	0.912752	-0.294125	0.0980833	0.114637	0.328975	-0.389153	0.275659	0.139648	-0.0168524	0.509567	-0.163949	-0.255063	-0.123702	0.341143	-0.164004	0.169785	-0.345503	0.143571	-0.258555	0.146852	0.176924	-0.00498503	-0.0638007	-0.0978283	0.00200508	-0.376941
366	0.952222	3.4852	0	0	0	0	0	0	-0.0639803	0.375132	-0.357741	-1.97582	-0.153974	0.743281	1.5685	-0.806918	-0.691332	-0.690268	-0.00130537	-0.465652	0.324745	-1.41303	0.155532	-0.705459	0.46473	-0.277138	0.260885	0.549646	0.232051	-0.168606	-0.0227342	-0.214906	0.0269435	0.0543763	0.257861	0.677912	-0.164875	0.248272	0.117372	-0.311407	0.121776	0.430349	-0.25685	0.137093	-0.099038	0.358864	-0.342133	-0.0731306	-0.271865
367	0.920601	2.99524	0	0	0	0	0	0	-0.104214	0.222476	-0.159953	0.241247	-1.34484	-1.66265	0.470475	0.648963	-0.119734	-0.634536	-0.752193	0.373497	-0.0472947	0.0722363	-0.859645	-0.00127537	0.0886663	-0.0260204	0.0912892	0.134424	0.00406061	0.0191334	-0.153669	0.0248787	-0.278288	0.170656	0.297201	-0.117241	0.169885	-0.0506716	0.231336	-0.0678865	-0.569677	-0.0210752	-0.00080145	0.158875	0.271138	-0.112854	0.329143	0.0350687	-0.149707
368	0.982565	2.82993	0	0	0	0	0	0	-0.0507063	0.390048	-0.362864	-1.7087	-0.373475	-1.59146	-1.55004	-0.980577	-0.196766	-0.43346	-0.00936092	-0.110584	-0.977556	0.0381819	0.182654	-0.470694	-0.589242	-0.199953	-0.067726	-0.221793	0.0128559	-0.311107	0.673385	0.132137	0.399998	-0.0326334	-0.164489	0.0378166	0.253511	0.06336	0.437179	0.379763	-0.158618	-0.0396027	0.284011	-0.122783	0.0354589	-0.14802	0.093985	0.0549092	0.0266447
369	0.971818	4.1477	0	0	0	0	0	0	-0.0331833	-0.308366	2.27087	-0.703215	0.0994726	0.10504	-1.39119	0.421198	-0.0280161	-0.229908	1.50866	-0.291475	-0.264221	-0.26277	-0.261226	0.167681	-0.257564	0.371551	0.202501	0.59367	0.24168	-0.226827	-0.26609	0.378286	0.443586	0.0134579	0.62497	-0.336212	-0.287012	0.48407	-0.0118772	-0.271888	0.0345653	0.419616	-0.154054	-0.142169	-0.831821	-0.277561	0.119689	0.0873898	-0.051901
370	0.979945	3.0574	0	0	0	0	0	0	-0.051433	2.03129	-0.927086	-2.25649	0.921036	-1.44002	-0.576901	-0.115205	-0.344442	0.18662	0.150298	-0.806029	0.696573	0.0756496	-0.447913	0.415931	0.746569	-0.419366	0.108671	-0.0604665	0.372096	-0.493639	0.690438	0.18203	0.112492	-0.160852	-0.304532	0.248113	0.0792456	-0.418707	0.109722	0.167042	0.112668	-0.172226	-0.297896	0.281686	0.435628	0.0268604	-0.366946	0.0347277	0.208059
371	0.991208	2.74991	0	0	0	0	0	0	0.125913	1.89769	0.185193	0.831676	-2.21454	-0.778337	0.67724	0.477429	-0.560561	-0.748664	-0.552737	-0.0257475	-0.321472	0.296835	0.711186	-0.0261227	-0.0220849	-0.528559	-0.0629489	0.123127	-0.309998	0.228715	-0.199912	0.0344804	-0.332613	-0.274069	-0.221282	-0.152378	-0.262771	-0.910812	0.178192	-0.12546	0.185552	-0.350034	-0.387384	-0.0457719	0.284559	0.0991229	-0.152493	-0.165265	0.220932
372	0.888022	2.50496	0	0	0	0	0	0	0.0795187	-0.0075314	-1.80874	1.21012	-0.465171	-0.0416729	2.21354	-1.33303	0.468429	-2.33144	-0.593281	-0.0548688	-0.311483	-0.874695	0.546369	0.114644	0.337805	-1.04927	0.132423	0.302874	0.301871	-0.216263	0.174552	-0.343771	0.234224	-0.639398	-0.195318	0.510999	0.0227494	-0.0412896	0.112108	-0.508883	-0.334383	-0.279944	-0.139238	-0.0252532	0.620065	0.140101	-0.313304	-0.185238	-0.453896
373	0.947573	2.83645	0	0	0	0	0	0	-0.14501	-2.34208	2.27062	0.845179	0.500371	-1.30927	-0.574034	-0.127964	0.192567	-1.03191	-0.83446	0.6731	0.327437	0.489966	0.616303	-0.313706	0.0829663	0.801061	-0.452859	1.05998	0.353742	-0.520149	0.220491	-0.119032	0.344385	0.13847	0.113563	0.0885968	0.213158	-0.0448214	0.227154	-0.198649	-0.04323	-0.381648	0.256709	-0.17455	-0.48694	-0.376561	-0.337198	0.0729549	0.333968
374	0.969987	-3.22689	0	0	0	0	0	0	-0.0705003	0.988117	0.0743001	-0.378162	-0.841594	-1.39656	0.455173	0.876767	-1.15775	0.0784647	1.21812	-0.594815	-0.0195627	0.366084	-0.417401	-0.216453	-0.390411	-0.00635437	0.179355	-0.359419	0.00251683	0.368648	-0.218881	-0.163347	0.141647	0.158612	0.418311	-0.00263149	0.253201	0.119436	0.49188	-0.0849558	0.108497	0.355145	-0.0279699	-0.279506	0.245276	0.336401	-0.0022967	-0.00251683	-0.350907
375	0.914278	2.87839	0	0	0	0	0	0	0.0641876	-0.270461	0.938066	-0.381921	-0.230121	-0.889236	0.607064	-0.430476	0.654468	0.647362	-0.0112736	-0.104174	0.165803	-0.53951	0.0302953	0.0305075	-0.221684	-0.0537664	0.595399	0.778828	0.295248	-0.345636	0.144816	0.55816	0.571855	0.248389	0.184943	0.00255717	0.23219	0.0133032	-0.0602192	0.087	0.112114	0.0689358	0.241734	0.233358	-0.512882	-0.280372	0.0959885	-0.175266	-0.142939
376	0.990499	2.81519	0	0	0	0	0	0	0.183543	1.3715	-1.8726	1.29906	-0.929835	-1.23723	-0.751097	-1.13755	1.24665	1.26572	-0.117129	0.0649533	0.788371	-0.145153	-0.316017	-0.219176	-0.549454	-0.225868	0.304447	0.35166	-0.221153	0.438411	-0.202739	-0.202997	-0.344706	0.536508	-0.152556	0.0579518	-0.0969298	0.0521418	0.178134	0.276176	-0.0886128	-0.288727	-0.0350693	0.164843	0.354727	0.436525	-0.185835	-0.0104521	0.155909
377	0.960272	2.89444	0	0	0	0	0	0	-0.057365	2.24922	1.66578	0.120286	-1.11592	-0.437598	-0.0957789	-0.789267	-0.057304	-0.654426	-0.633408	-1.6716	0.291637	0.449601	0.527134	-0.308369	-0.116939	0.234881	0.632789	0.124388	-0.104707	0.379139	-0.498933	0.531064	0.362105	0.163773	0.00492771	-0.440306	0.138638	0.17371	0.683411	-0.171944	0.111546	0.164828	0.0734153	-0.031274	-0.0630063	-0.259441	0.0828986	-0.575207	0.0694265
378	0.931963	3.33102	0	0	0	0	0	0	-0.0445853	2.68177	-0.218551	0.700916	3.11888	-0.118796	0.76041	0.8254	-0.658086	0.0066236	-0.716904	0.315738	0.208782	0.42045	0.717521	-0.458309	0.966079	0.22817	0.281665	0.341134	0.577288	-0.674428	0.595041	0.114103	-0.140786	-0.634764	-0.101374	0.763259	-0.719399	-0.0348326	0.285903	0.094408	-0.395801	-0.40034	-0.0586429	0.296021	1.04227	0.153287	-0.239063	0.128477	0.258352
379	0.901402	-2.44589	0	0	0	0	0	0	0.0592501	2.83542	2.65777	0.856237	2.13457	-0.16205	0.553343	1.12308	1.3262	0.643472	-1.00041	1.14895	1.30163	0.147304	0.283207	0.124324	-0.0632999	-0.815958	0.519267	0.0379176	-0.171798	0.119812	0.0794524	-0.156954	-0.168978	0.157154	-0.151584	0.0120923	-0.171025	-0.146306	0.185436	0.16574	0.309147	-0.107883	-0.507068	0.0976663	0.312666	-0.0283973	0.275318	0.099984	0.0456157
380	0.893571	-2.84787	0	0	0	0	0	0	0.0559258	-5.21591	0.319216	-0.782031	0.40096	1.4156	-0.727852	-1.25368	0.716411	1.04662	-1.11291	0.223091	-0.821012	0.78809	0.550261	0.16595	-0.305004	0.210265	-0.44232	0.00587663	0.44523	-0.626707	0.143305	-0.112698	0.42676	0.369037	0.246272	-0.0365228	0.612959	0.522297	-0.664108	-0.254193	-0.111554	0.0149537	0.411021	-0.220591	-1.02428	-0.80797	-0.00513013	0.127012	0.24296
381	0.906709	3.15577	0	0	0	0	0	0	-0.10499	0.0469279	-0.725481	-1.76049	1.08833	-0.225074	-0.482164	-1.14741	-1.70919	0.591746	0.599289	-0.719712	-0.0425041	-0.127593	0.362501	-0.659623	0.638299	-0.250679	0.248245	-0.0920616	0.373747	0.387696	-0.0825691	-0.451427	-0.332712	0.260724	0.320793	-0.0490028	-0.281901	0.054742	0.144507	-0.0408053	-0.304746	0.355726	0.374308	-0.128262	-0.357819	-0.163242	-0.0517329	-0.25597	0.135895
382	0.992285	3.0761	0	0	0	0	0	0	-0.0632985	-0.754485	-1.19182	-0.646149	0.620134	0.878691	-1.02728	-0.946548	0.121266	-0.539113	1.09031	1.00053	-0.935045	0.269872	0.219005	0.258181	0.29613	0.00375921	0.417785	-0.195308	-0.606436	-0.0954646	-0.227373	-0.325799	0.519817	0.395567	-0.049821	0.239135	0.0394608	0.271239	0.131158	-0.483132	-0.0128984	0.485555	0.299616	-0.291318	-0.338629	-0.323266	0.135013	-0.131321	-0.130993
383	0.930195	2.95582	0	0	0	0	0	0	0.0596418	-0.562961	-0.540009	0.246655	0.484575	0.536802	-1.67992	0.569748	0.0267542	0.981799	0.221251	-1.40552	0.23002	0.987934	0.408495	-0.443691	0.449102	-0.276319	0.289556	-0.215152	0.0957895	-0.205749	0.207564	0.282167	-0.320667	0.359683	0.121339	-0.385221	0.308853	-0.171321	0.0191663	-0.20224	-0.0896823	0.122269	0.208663	0.483801	0.113255	-0.344127	0.000425582	-0.0536295	-0.183176
384	0.961166	3.20084	0	0	0	0	0	0	0.0616112	-1.58886	-0.166276	0.25742	-0.125221	0.0048981	0.517714	1.02089	0.0716775	-0.453839	-0.141514	-0.669384	0.221116	0.220363	0.459678	0.840732	-0.316497	-0.195149	-0.059788	-0.153517	0.0669489	-0.0648534	0.377768	-0.00234827	0.325818	0.0205277	-0.0131498	0.00637708	-0.149935	0.036228	-0.414024	-0.201506	0.112381	-0.214159	0.74278	-0.160785	0.00274565	-0.277107	-0.0519099	-0.184263	-0.167118
385	0.984189	3.17214	0	0	0	0	0	0	0.197104	-0.431944	-2.5541	0.27177	0.599778	1.304	-0.5894	-1.0001	-0.686416	-0.653779	-0.541026	-0.175902	-0.640197	-0.557735	1.25154	0.127825	0.402111	0.244241	0.280958	-0.0915498	-0.205153	0.336162	-0.0123103	-0.124197	0.316492	0.166076	-0.151086	0.370311	-0.289434	0.585811	-0.0320497	-0.251398	-0.0964818	0.0226211	0.549857	0.0875645	-0.0546934	-0.0902059	-0.342577	0.0193326	-0.104563
386	0.974282	3.02528	0	0	0	0	0	0	0.111347	0.905234	-0.0424331	-0.545552	-0.627005	-1.01625	0.201799	-1.40517	1.39657	1.62449	-0.439589	0.570852	-0.261333	0.169043	-0.540735	-1.05886	-0.694859	-0.73277	0.182523	0.191336	0.368404	-0.38248	0.427224	0.115766	0.00463966	-0.181043	0.129134	0.158381	0.248874	0.0931996	0.0116069	0.458793	-0.169903	-0.108936	0.122806	0.0868212	0.0531431	-0.0422662	0.0027458	-0.227951	0.467256
387	0.950867	2.89389	0	0	0	0	0	0	-0.00135794	-0.885944	-0.344518	1.0901	0.292325	0.664803	-0.195979	-0.0139087	-0.392736	1.06782	1.57411	-0.560204	0.587603	0.183416	0.291963	-0.524004	-1.19628	0.468779	0.169896	-0.543392	0.554709	-0.707597	-0.154824	0.619575	0.070561	0.0501435	-0.389924	-0.441334	0.188476	0.255327	-0.357408	0.406977	0.381304	-0.0980036	0.395126	-0.154519	-0.0351791	0.257037	0.373979	-0.227523	0.279981
388	0.872481	-2.84808	0	0	0	0	0	0	0.0676468	-2.12164	-0.225896	0.826576	1.03953	-0.134404	1.60639	0.411864	0.162397	0.424723	-0.373247	0.273555	-0.489252	0.187594	0.68949	0.255554	-0.443926	0.476679	-0.493102	0.141604	0.0035107	0.318097	-0.375657	0.18876	0.474315	-0.0990184	0.35317	-0.278831	0.0227092	0.55528	-0.399261	-0.0316299	-0.287822	-0.141602	-0.145018	0.154329	0.041876	0.295031	0.0586848	0.407693	-0.0800012
389	0.981878	4.04947	0	0	0	0	0	0	-0.0557055	-0.467243	0.671703	-1.32724	1.11617	0.375299	1.64048	0.587043	0.01108	-0.161063	0.377945	0.340468	-0.72383	-0.273414	-0.310571	-1.06046	0.239877	0.526919	0.300747	-0.205343	0.301273	-1.13957	0.453479	0.215231	0.217609	0.0867057	0.473623	-0.321966	-0.0529693	0.397625	-0.393609	-0.607617	0.281187	0.182932	0.134392	-0.249684	-0.109466	0.104724	0.0369644	-0.114902	-0.234905
390	0.886694	-2.69813	0	0	0	0	0	0	0.168313	0.0318439	-0.155888	0.900143	-1.7761	-0.827454	0.834515	0.265735	-0.268478	0.350423	0.319583	0.279846	-0.239779	0.795602	1.21721	0.440914	-0.669459	0.00625077	0.364724	-1.09124	0.108787	-0.166667	0.486396	0.0790444	-0.0348225	-0.0794886	-0.297738	-0.554017	-0.0134318	-0.316129	-0.18971	-0.0627404	-0.414381	-0.108966	-0.297654	0.197645	0.159342	0.19569	0.0408336	0.0168441	0.472505
391	1.0014	3.14193	0	0	0	0	0	0	0.0381089	1.56952	1.1155	1.30431	-1.20105	0.131851	0.174089	-1.33415	-0.165715	-1.31083	-0.36862	-1.28909	0.511713	-0.0575386	0.380536	0.30869	-0.414426	0.11103	0.0784834	0.142006	0.345239	-0.318883	0.038441	-0.030643	0.013453	0.502211	-0.494169	0.416579	-0.0916126	-0.111747	0.427324	-0.0238377	0.174862	0.213538	-0.383603	0.228156	0.0919597	-0.132066	-0.0647736	-0.165643	0.170543
392	0.871185	2.70269	0	0	0	0	0	0	-0.0878813	-2.65159	-2.09314	0.634057	1.41997	0.588273	-0.800367	1.07689	-0.156841	-0.541801	0.38887	-0.133481	-1.1132	0.273109	0.498207	-0.00205923	-0.0587209	0.5283	-0.0194559	-0.374465	-0.316374	0.0637001	-0.326525	0.243127	-0.277768	-0.103128	-0.0526782	0.130087	0.203646	0.900814	-0.558767	-0.0774237	-0.901403	-0.169187	0.241482	-0.407427	0.477548	0.244889	0.106511	-0.146774	-0.152765
393	0.883251	2.57086	0	0	0	0	0	0	0.0745461	-0.770595	-0.67447	2.02867	0.617261	-0.367969	0.2562	-0.929431	-0.752225	-0.108662	-0.377308	-0.110001	0.517286	0.338185	0.297835	0.0331445	0.243542	-1.01344	0.274034	0.290197	-0.0119798	0.0976636	-0.0692143	-0.114119	-0.404801	0.115291	-0.00643639	0.115832	0.146151	0.277481	-0.10335	0.370074	-0.164082	0.0585325	-0.114678	-0.0940113	-0.200521	-0.43956	0.183881	0.0056906	0.449272
394	0.975588	2.92256	0	0	0	0	0	0	0.0725186	2.83392	-0.618923	1.96795	-1.49538	-0.916304	0.058751	0.638338	0.460371	0.0441917	0.0805485	-0.38879	0.375729	0.0439173	-1.18761	-0.0399945	0.363772	-0.625465	-0.254009	0.258778	-0.279419	0.367117	-0.29137	0.176649	-0.00206575	-0.163431	-0.178426	-0.00597339	-0.0392666	-0.788922	0.435138	0.461161	0.157304	0.0151198	-0.160203	0.0140171	0.487041	0.256618	0.461756	-0.247513	-0.106331
395	0.90367	-2.85245	0	0	0	0	0	0	-0.113578	-0.73862	1.45726	-1.48317	-2.10886	-0.491853	-1.0069	0.733907	0.0547603	-1.26051	0.279374	0.945663	-0.548754	-0.973597	-0.642244	0.184113	0.304592	0.171473	0.410774	-0.460889	0.549087	0.0277389	0.196548	0.0625436	-0.297213	0.641253	0.103119	0.291356	0.0013492	-0.192054	-0.216436	-0.0690466	-0.135926	0.0504016	-0.127816	-0.217646	-0.262672	-0.544892	0.119511	0.0932225	-0.267659
396	0.944596	3.01728	0	0	0	0	0	0	0.0762096	0.0303465	-3.1444	2.15187	-0.306775	-0.791002	1.05759	-0.151776	0.215621	1.08673	-0.498964	1.78107	-0.457487	-0.248237	-1.26647	0.62981	-0.250849	-0.211831	0.423614	0.0207602	0.543974	-0.257369	0.157058	0.223847	0.0379713	0.381406	0.0199573	0.408742	0.0122281	0.116754	-0.0369148	-0.0325584	-0.289918	-0.361115	0.0563093	0.290377	0.351897	0.152239	-0.0407271	-0.45221	-0.307225
397	0.893745	3.06399	0	0	0	0	0	0	-0.0572701	0.361487	1.7169	-2.43492	-1.0143	0.499737	-0.315392	0.141679	0.09218	0.645846	1.10384	0.65869	-0.315842	-0.0486516	0.389023	-0.228619	-0.40053	0.429321	-0.587341	-0.571488	-0.674692	0.615003	-0.896623	-0.215728	0.175072	-0.41809	0.430278	-0.746506	0.576453	0.300373	0.158784	-0.159994	-0.236905	0.314569	-0.153667	-0.0724095	0.0870163	0.475199	-0.353632	0.146295	-0.231418
398	0.959719	3.53762	0	0	0	0	0	0	0.0777014	-1.11639	-3.15359	1.87932	0.247788	0.317755	-0.552533	-0.200054	-0.359723	-0.0108809	-1.27225	0.797326	0.589031	0.239504	-0.178429	-0.284518	0.883067	-0.562385	0.309319	0.283665	-0.203354	0.00461692	-0.25816	0.118979	0.0193148	-0.145732	-0.0471678	0.439364	0.134992	0.152412	-0.18243	0.0967601	-0.0160631	-0.221534	0.216456	-0.123295	0.105426	-0.186501	0.0490322	-0.37568	0.201859
399	1.00233	3.50955	0	0	0	0	0	0	0.0121405	1.68113	-0.0720128	-0.432797	1.21516	-0.897596	-0.935543	0.315434	0.259821	-0.386831	-0.275901	-0.640626	-0.775428	0.249233	0.316243	-0.181236	0.0491176	0.612789	-0.041504	0.429451	0.108518	0.135645	-0.402338	-0.0695937	0.504793	-0.0170227	0.232756	0.593538	-0.638918	0.146659	0.291464	-0.139411	-0.0515245	-0.256408	-0.391163	-0.127144	0.403123	0.424252	-0.200228	-0.022202	0.0967655
400	0.973778	2.99124	0	0	0	0	0	0	0.031044	0.395842	3.39167	0.109193	-0.483702	0.883323	-0.260761	-0.737199	0.146401	-0.536402	-0.728038	1.2414	0.785038	1.03115	0.363552	-0.11603	0.0899575	0.240313	0.452661	-0.683331	0.457979	-1.2236	0.528252	-0.494112	-0.187358	0.107399	-0.1878	-0.218109	-0.0700383	0.0673353	0.58693	-0.289246	0.665105	0.124914	-0.147446	-0.10522	-0.493343	-0.39254	-0.00253367	-0.0244566	0.224995
401	0.974591	2.94616	0	0	0	0	0	0	-0.0472954	0.0755936	-1.12278	-0.317821	0.454228	-0.569633	-1.22113	-0.113302	1.23098	0.542502	0.937385	-0.479215	-0.587373	0.36501	0.366101	-0.388653	0.0765698	-0.630967	0.219224	0.356704	-0.174514	-0.058085	0.515392	-0.166967	0.188893	-0.239855	0.357079	0.307474	0.142382	-0.144322	-0.514598	-0.227739	-0.686764	-0.119214	-0.0397228	0.27809	-0.216512	-0.497957	-0.00476958	0.391439	0.00252763
402	0.94067	2.82882	0	0	0	0	0	0	0.197649	0.263284	0.821841	0.979743	-0.53468	-0.474125	0.227686	1.43084	-0.131807	-0.509055	0.0996196	0.236013	1.41365	-0.585407	0.379503	0.231307	-0.293037	-1.12529	-0.153291	-0.761577	-0.712209	0.640471	-0.90074	-0.184953	0.0874055	-0.151381	0.093193	0.382291	-0.305233	-0.241562	0.484852	-0.255381	-0.274012	-0.00259827	-0.220401	-0.157207	0.0789096	-0.117474	-0.337929	0.124103	0.142339
403	0.942945	2.96527	0	0	0	0	0	0	-0.0148035	-1.52285	-2.44869	-0.245825	-1.53923	0.471374	0.462202	0.883464	-0.512396	-0.217361	0.432452	0.36694	-0.702267	0.939972	-0.123845	0.811576	0.340089	-0.103089	0.583271	-0.533797	0.453986	-0.511018	0.0727479	0.540086	-0.539693	0.1043	-0.174531	-0.31187	0.266854	0.0396858	-0.23475	0.0103195	-0.417914	0.421422	0.0633632	-0.264867	-0.0422033	-0.0948439	0.446977	0.0946228	0.0652056
[truncated: 203 more rows]
[truncated: 221 more columns]

## Sheet: 195K-Normal_Modes
Structure-Nr.	δ / mm s-1	ΔEQ / mm s-1	1	2	3	4	5	6	7	8	9	10	11	12	13	14	15	16	17	18	19	20	21	22	23	24	25	26	27	28	29	30	31	32	33	34	35	36	37	38	39	40	41	42	43	44	45	46	47
[truncated: 606 more rows]
[truncated: 221 more columns]

## Sheet: 300K-Normal_Modes
Structure-Nr.	δ / mm s-1	ΔEQ / mm s-1	1	2	3	4	5	6	7	8	9	10	11	12	13	14	15	16	17	18	19	20	21	22	23	24	25	26	27	28	29	30	31	32	33	34	35	36	37	38	39	40	41	42	43	44	45	46	47
[truncated: 606 more rows]
[truncated: 221 more columns]
